# Supplementary material
Source: PubMed Central journal article supplement (PMC3966280)
Supplement: NIHMS56160-supplement-Supplement1.pdf [file NIHMS56160-supplement-Supplement1.pdf]

## Supplementary Appendix

This appendix has been provided by the authors to give readers additional information about their work.

Supplement to: Nangalia J, Massie CE, Baxter EJ, et al. Somatic *CALR* mutations in myeloproliferative neoplasms with nonmutated *JAK2*. *N Engl J Med* 2013;369:2391-405. DOI: 10.1056/NEJMoa1312542

## SUPPLEMENTARY APPENDIX

### Table of Contents

| <b>Section</b>        | <b>Page</b> |
|-----------------------|-------------|
| Supplementary methods | 2           |
| Primer sequences      | 7           |
| References            | 8           |
| Figures S1-S9         | 9           |
| Tables S1-S6          | 17          |

## Supplementary Methods

### Patient samples

Samples were obtained from patients with myeloproliferative neoplasms and other cancers following written informed consent and local ethics committee approval. The study was conducted from 2010 to 2013. Tumor samples were obtained by isolating granulocytes from peripheral blood. Constitutional samples were obtained from either buccal swabs, T-cell or cultured T-cell DNA. Empirical testing identified cultured T-cells as having the lowest contamination with known myeloproliferative neoplasm driver mutations eg *JAK2*<sup>V617F</sup>, particularly, in patients with myelofibrosis (MF) or high clonal burden (Figure S1). All constitutional samples were screened by qPCR for the presence of *JAK2*<sup>V617F</sup> and/or *MPL*<sup>W515L/K</sup> mutations known to be present in matched tumor samples, and patients with contaminated buccal or T-cell DNA were prioritized for T-cell cultures. In addition, T-cell cultures were prioritised for patients with high-burden disease to minimise contamination of constitutional material with neoplastic cells. Overall, 88% of constitutional DNA samples for patients with MF were derived from T-cell cultures. CD3-positive T-cells were isolated from MPN patients (CD3 MicroBead kit, Miltenyi Biotec) and stimulated using CD2, CD3 and CD28-coated beads for 72 hours in RPMI supplemented with 10% human albumin solution (HAS) and grown in the same media supplemented with IL-2 for up to 14 days. If further expansions of cell numbers were required this stimulation protocol was repeated. Where constitutional DNA was limited, whole genome amplification (WGA) was performed to supplement unamplified constitutional DNA (Figure S2).

### Sequencing and genomic alignment

Matched pairs of constitutional and tumor DNA from each MPN patient were used to generate genomic libraries enriched for protein-coding exons using Agilent SureSelect All Exome 50Mb RNA probe sets, as previously described<sup>1-3</sup>. These Illumina sequencing libraries containing an average insert size of 200-300bp were subjected to 75bp paired-end sequencing on the Illumina HiSeq platform. Sequencing data were mapped to the hg19 reference genome using the BWA algorithm on default settings.

### Somatic variant calling

Somatic variants were called by pairwise comparison of tumor and constitutional sequence reads using previously described methods for substitutions (CaVEMan) and insertions or deletions (Pindel)<sup>1-3</sup>. Targeted searches of unfiltered calls were undertaken for genes commonly affected by insertions or deletions (*CALR*, *TET2*, *ASXL1*) to ensure that variants were not missed due to data filtering. In addition, due to poor coverage of exon 9 *CALR*, unmapped mutant reads were recovered by mapping reads to reference mutant *CALR* alleles.

### Somatic Variant Validation

Somatic variants were validated using an Agilent SureSelect custom bait-set with tiling coverage of 125bp around the original exome mutation calls. Fresh DNA aliquots were whole genome amplified for bait-capture and sequencing as described above. Mutations were marked as 'confirmed somatic' if they were identified in tumor samples from both exome and validation experiments and if they were absent or  $\geq 3$ -fold lower in constitutional samples in

both exome and validation experiments. It was not possible to design capture probes for all regions and at a small proportion of sites sequencing depth was too low to confidently validate somatic mutations, therefore we report manually curated variants with convincing evidence for the mutation based on exome data (high coverage, good quality sequencing, high fraction of reads reporting the variants in the tumor and no reads reporting the variant in matched germline sequencing data).

#### Testing for enrichment, dependency and mutual exclusivity of mutations

To determine whether the frequency of missense, nonsense and splice site mutations was higher than expected by chance for each gene, we adapted a previously described method<sup>4</sup>. Briefly, the rate of mutations is modeled as a Poisson process, with a rate given by a product of the mutation rate and the impact of selection. In particular, we use 12 parameters to describe the different rates of the 12 possible single nucleotide substitutions, 2 parameters to better account for the CpG effect on C>T transitions in each strand, and 3 selection parameters to measure the observed-over-expected ratio of missense (wMIS), nonsense (wNON) and essential splice site (wSPL) mutations. For example, the expected number of A>C missense mutations is modeled as:  $\text{rate}_{\text{misA>C}} = (t) \cdot (\text{AtoC}) \cdot (\text{wMIS}) \cdot (L_{\text{misA>C}})$ ,  $L_{\text{misA>C}}$  being the number of sites that can suffer a missense A>C mutation (which is calculated for any particular sequence). "t" refers to the overall mutation rate or the density of mutations. The likelihood of observing  $n_{\text{misA>C}}$  missense A>C mutations given the expected rate  $\text{rate}_{\text{misA>C}}$  is then calculated as  $\text{Lik} = \text{Pois}(n_{\text{misA>C}} | \text{rate}_{\text{misA>C}})$ . The likelihood of the entire model is the product of all individual likelihoods. This allows us to quantify the strength of selection while avoiding the confounding effect of gene length, sequence composition and different rates of each substitution type. To obtain accurate estimates of the relative rates of each substitution type, the 14 rate parameters were estimated from the entire collection of mutations. These rates are shared by all genes and maximum-likelihood estimates for "wMIS", "wNON" and "wSPLICE" are obtained for each gene. Likelihood Ratio Tests are then used to test deviations from neutrality (wMIS = 1, wNON = 1 or wSPL = 1). Owing to the limited number of mutations, mutation rates were assumed constant among genes but an additional Likelihood Ratio Test was performed for each gene to detect violations of this assumption (comparing the observed number of synonymous mutations to the assumed mutation rate). No gene was found to deviate significantly from its estimated mutation rate in this dataset ( $q > 0.05$  for all genes). For Indels we test for significant enrichment of indel recurrence within gene coding sequences compared to the expected background rate, under a uniform distribution model. Interactions between mutations were assessed to determine any co-dependence or mutual exclusivity using previously described methods<sup>1</sup>.

#### Clonal analysis of mutations identified by exome sequencing

Plots in Figure S9 were produced using a previously developed Bayesian Dirichlet process to model clusters of clonal and subclonal point mutations, allowing inference of the number of subclones, the fraction of cells within each subclone and the number of mutations present within each subclonal population<sup>5</sup>. Within this model, the number of reads bearing the  $i$ th mutation,  $y_i$ , is drawn from a binomial distribution

$$y_i \sim \text{Bin}(N_i, \zeta_i \pi_i), \text{ with } \pi_i \sim \text{DP}(\alpha P_0)$$

where  $N_i$  is the total number of reads at the mutated base and  $\zeta_i$  is the expected fraction of reads that would report a mutation present in 100% of cells at that locus.  $\pi_i \in (0, 1)$ , the fraction of cells carrying the  $i$ th mutation, is modelled as coming from a Dirichlet process. We use the stick-breaking representation of the Dirichlet process:

$$\omega_h = V_h \prod_{l < h} (1 - V_l), \text{ with } V_h \sim \text{Beta}(1, \alpha)$$

where  $\omega_h$  is the weight of the  $h$ th mutation cluster, i.e. the proportion of all somatic mutations specific to that cluster.

Gibbs sampling was used to estimate the posterior distribution of the parameters of interest, implemented in R, version 2.11.1. The Markov chain was run for 10,000 iterations, of which the first 2,000 were discarded. The median of the density was estimated from  $\pi_h$ , each weighted by the associated value of  $\omega_h$ , using a Gaussian kernel, implemented in the R libraries *stats*. In Figure S9 the median values are plotted as a purple line and the 95% confidence intervals as a pale blue region. The grey histogram shows the observed frequency density of mutations as a function of the fraction of cells bearing the mutation.

#### CALR targeted sequencing

Sanger sequencing was used to validate exome calls for *CALR* (in addition to validation of exome sequencing *CALR* variants by custom bait capture and resequencing), test constitutional material and to genotype DNA samples from additional patient samples and normal controls as detailed in Table 1. Sequence trace analysis was performed using Mutation Surveyor (SoftGenetics, State College, Warrington, United Kingdom). Sensitivity of Sanger sequencing was established by testing a mixture of plasmids (pGEM-T Easy vector (Promega)) containing either *CALR* exon 9 wildtype or mutant (L367fs\*46) in varying proportions. In addition, we mined publicly available whole genome and exome sequencing data sets of multiple malignancies and a panel of controls for the presence of *CALR* mutations. Germline variants in *CALR* were infrequently found (9 and 12 base pair deletions in exon 9) and were confirmed using data from the 1000-Genomes project, panels of healthy blood exome sequencing data and targeted sequencing of *CALR* mutations in matched constitutional samples (T-cells).

#### Cell line cultures and transfection

HEK293T and 32D cells were cultured in RPMI supplemented with 10% fetal calf serum, L-glutamine, penicillin/streptomycin as well as IL-3 for 32D cells.

#### Plasmid construction

*CALR*-FLAG plasmid constructs were made using PCR fragments amplified from cDNAs derived from patients with either *CALR* insertion or deletion. The common forward primer for the PCR was 5'-ATCGAAGCTTATGCTGCTATCCGTGCCGC-3' and the reverse primers were as follows:

Wildtype: 5'-ATCGCTCGAGCAGCTCGTCCTTGGCCTGGC-3'  
 L367fs\*46: 5'-ATCGCTCGAGGGCCTCAGTCCAGCCCTGGAG-3'  
 K385fs\*47: 5'-ATCGCTCGAGGGCCTCAGTCCAGCCCTGGA-3'

The PCR fragments were cloned into the HindIII/XhoI sites in pCDNA5\_FRT\_3XFLAG-c-term (UK918, David Ron). Similarly, PCR fragments were amplified from cDNAs derived from patients with either *CALR*<sup>K385fs\*47</sup> (common insertion) or *CALR*<sup>L367fs\*46</sup> (common deletion) with the following primers:

Forward primer 5'-ATTATCTAGAGGAGGGTCGTTTTAAAGGGC-3'

Reverse primer 5'-ATTAAGATCTGAGTGGAGGAGGGGAACAAA-3'

PCR fragments were cloned into XbaI/BglII sites of pCDF1-MSC2-EF2-copGFP (System Biosciences).

#### Immunofluorescence and confocal microscopy

COS-7 cells grown on cover glass were transiently cotransfected with vectors encoding for wildtype or mutant CALR-FLAG and either a Golgi reporter Galt-YFP ( $\beta$ 1,3-galactosyltransferase fused to Yellow Fluorescent Protein (YFP)<sup>6</sup> or CALR-GFP<sup>7</sup>. Cells were fixed with 2% paraformaldehyde followed by permeabilization in 1% Triton X100. Cells were then stained with a primary mouse anti-FLAG (Sigma, diluted 1:200) and goat anti-mouse DyLight543 conjugated IgG secondary antibody (1:200, Jackson ImmunoResearch Laboratories). Cytospin slides were prepared from myeloid cells of normal or mutant CFU-GM colonies derived from two *CALR*-mutated patients with essential thrombocythemia (ET) - one patient with *CALR*<sup>K385fs\*47</sup> (common insertion) and one patient with *CALR*<sup>L367fs\*46</sup> (common deletion). The cells were fixed in methanol/acetone (1:1) and then co-stained with primary rabbit anti N-term CALR (ab39897, Abcam) and mouse anti PDI (Assay Design). Goat anti rabbit AlexaFluor 555 and anti mouse AlexaFluor 488 conjugated IgG secondary antibodies were used (1:500, Invitrogen). CALR localization was visualized by immunofluorescence using a Zeiss 510 Meta laser scanning confocal system with Plan-Apochromat x63 oil immersion lens (NA = 1.6) to acquire fluorescence microscopy images as described. Experiments were repeated three times and samples were tested in triplicate during each experiment. Representative images are shown.

#### Protein analysis and immunoblotting

Cells were lysed in SDS-sample buffer and samples run on a SDS polyacrylamide gel. Western blot analyses were performed using the following antibodies: CALR (ab39897, Abcam), Flag (F1804, Sigma), B-Actin (sc47778, Santa Cruz).

#### Flow cytometric analysis of cell surface calreticulin

Whole peripheral blood lysed for red blood cells and 32D cells were analysed for cell surface CALR by a Becton Dickinson (BD) Fortessa LSR II and data were analysed in Flowjo (Treestar, USA). Antibodies used were as follows: CALR-PE (abcam83220, FMC-75, Abcam), CD15- FITC (BD), CD19 Alexa647 (BD), CD4 APC (BD). White blood cells were gated by forward and side scatter, and for viability (DAPI-negative) prior to assessment of CALR positive cells in viable, granulocytic (CD15 positive) or lymphocytic (CD647 or CD4 positive) compartments. 32D cells were gated on GFP positive and negative populations. Mean fluorescence intensity and percentage positive calreticulin cells were calculated in relation to an IgG1 PE control (BD).

### Hematopoietic stem and progenitor cell isolation

Peripheral blood mononuclear cells were depleted of differentiated hematopoietic cells using the EasySep Human Hematopoietic Progenitor enrichment kit (#19056 STEMCELL Technologies) and stained with anti-CD34 Per-CpCy5.5 (clone 581 Biolegend), anti-CD38 FITC (clone HIT2, BD), anti-CD90 APC (clone 5E10, BD), anti-FLK2 PE (clone BV10A4H2, Biolegend), anti-CD10 APC-Cy7 (clone HI10a, Biolegend), and anti-CD45RA Horizon V450 (HI100, BD). HSCs were isolated as  $\text{lin}^{-}\text{CD34}^{+}\text{CD38}^{-}\text{CD45RA}^{-}\text{CD90}^{+}$ , CMPs as  $\text{lin}^{-}\text{CD34}^{+}\text{CD38}^{+}\text{CD90}^{-}\text{CD10-FLK2}^{+}\text{CD45RA}^{-}$ , GMPs as  $\text{lin}^{-}\text{CD34}^{+}\text{CD38}^{+}\text{CD90}^{-}\text{CD10-FLK2}^{+}\text{CD45RA}^{+}$  and MEPs as  $\text{lin}^{-}\text{CD34}^{+}\text{CD38}^{+}\text{CD90}^{-}\text{CD10-FLK2}^{-}\text{CD45RA}^{-}$ . The CMP, MEP and GMP fractions were placed directly into colony forming assays (Methocult 04435; STEMCELL) as described by the manufacturer. Day 10 colonies were picked and genotyped for *CALR* exon 9 was by PCR and Sanger sequencing.

### Clonal analysis

Erythroid colonies were grown from patients harbouring *CALR* mutations and clones were genotyped for all mutations identified by exome sequencing to empirically determine the underlying clonal hierarchy. Briefly, peripheral blood mononuclear cells were isolated from fresh patient blood samples, cultured for 10 days in MethoCult (04034; STEMCELL) and single erythroid (BFU-E) or granulocyte-monocyte (CFU-GM) colonies were plucked into separate aliquots of RLT lysis buffer (Qiagen) to allow subsequent DNA extraction. Using Sanger sequencing, we genotyped each colony DNA for all coding mutations identified by exome sequencing and integrated these genotyping results to empirically determine the clonal hierarchy for individual patients.

### Statistical analysis

Differences between patients with *CALR* mutations versus *JAK2* mutations were analyzed by *t* test (hemoglobin) where data were normally distributed, Wilcoxon rank-sum test (platelets, white cell count, age at diagnosis) where data distribution were skewed, and Fisher's exact test for categorical data. Comparison of number of somatic mutations between MPN subtypes was performed using a one-way analysis of variance and pairwise *t* tests with multiple hypotheses correction.

## PCR and sequencing primers

| Sample | Gene            | Forward Primer (5'→3')   | Reverse Primer (5'→3')         |
|--------|-----------------|--------------------------|--------------------------------|
|        | <i>CALR</i>     | CCTGCAGGCAGCAGAGAAAC     | ACAGAGACATTATTTGGCGCG          |
| PD4063 | <i>FAT2</i>     | GGTGTGGAGAATTGGGGTAT     | GACCCCTATCTTGGGGACAT           |
| PD4063 | <i>EIF5B</i>    | GGGAGAAAGTGAAGGCAGTG     | CCTCCGTTTTGCTTTGTCAT           |
| PD4063 | <i>KIAA1244</i> | TGCTTTTTGGTTCCAGGTC      | AGGCAGACACCTGCAGAAAT           |
| PD4063 | <i>ZNF561</i>   | CCAAAAGGCATTTAGGACAAA    | GCGAACTCATACCGGAGAGA           |
| PD8632 | <i>COL1A1</i>   | CTCCGGATGTTCTCGATCTG     | CCCCACTCTCTTCCCTCTCT           |
| PD8632 | <i>COL4A2</i>   | GCTGGTTGGCTGATTCTCTC     | GCTCCCCCAGGTTATAAAGG           |
| PD8632 | <i>LRTM1</i>    | GCCATGGCACTGACCTAAAT     | TGCTCCTGTTTTCCAGTGTG           |
| PD8632 | <i>OR52I2</i>   | GTGGGGGTTATGGCTTTGTA     | TCATGAACCCAGGTTGGAAT           |
| PD6563 | <i>KNTC1</i>    | TTGTCTTTTGCAGAGAGTGGTT   | AATGGAGCGAGACCCTGTCT           |
| PD6563 | <i>ABCC9</i>    | CACCAGGAACTTACTCCAGTTGTG | GCAGATCATCCAAATCGGACTCCA       |
| PD6563 | <i>DIP2C</i>    | CCGAAACCATATGCTTGAT      | GGCTCCGATCAGTGAATACC           |
| PD6563 | <i>ARHGAP32</i> | AGGCCCTTGACGACTGCTATCTTT | TGCATGGTTTGCTACTCCTCTGGA       |
| PD6563 | <i>B4GALNT2</i> | TGCTACTGGGCAAGCGACTATGAT | TTGCTGGAACAGAGTGAGAATGGG       |
| PD6563 | <i>IFNAR1</i>   | TCCCTGTGCTGGGAGCAATCATT  | CAGGTCATTCTGACAAATCAGTAAGTAGAG |
| PD6563 | <i>GTPBP2</i>   | AAACGCTATCAATGGCCTGCCAAG | TGCCTCCTGTTTGGACTGTCTTCA       |
| PD6563 | <i>STX11</i>    | CGTACACGAGCTCTTCTTGCAAT  | AAGACTGAGTTCCGGAAAGGGTTG       |
| PD6561 | <i>CELF5</i>    | TAGGAACAAGCCGAGGACAC     | GCCATGCCTACAGCCTCAG            |
| PD6561 | <i>CRYGN</i>    | CCTCCAGCAGGAAGACTCAG     | GGGCTTTATGAACCGAGTGA           |
| PD6561 | <i>GK5</i>      | TTCTATGGGGAAGGGGAAGT     | AACGTGGCTATGTTGTTGTTG          |
| PD6561 | <i>OR4C6</i>    | AGACACCCTCTCCAAGAGCA     | CCTCCTACCATTAGGCAGCA           |
| PD6561 | <i>PDE4B</i>    | ACCCAAGGTGTTAGCAACTGA    | TGTTCACTTAGTTTGGTTTGG          |
| PD6561 | <i>KIAA0802</i> | TACCTCACCTTCGGTGACT      | GCTGACTTCAGCTCCTCCTG           |
| PD6561 | <i>KIAA0802</i> | TACCTCACCTTCGGTGACT      | GCTGACTTCAGCTCCTCCTG           |
| PD7442 | <i>CPA4</i>     | CCCTTCAGCTCAATTTCTGG     | CTTGCAAATCACTCCGGTCT           |



1. Papaemmanuil E, Cazzola M, Boulton J, et al. Somatic SF3B1 mutation in myelodysplasia with ring sideroblasts. *N Engl J Med* 2011;365(15):1384–95.
2. Varela I, Tarpey P, Raine K, et al. Exome sequencing identifies frequent mutation of the SWI/SNF complex gene PBRM1 in renal carcinoma. *Nature* 2011;469(7331):539–42.
3. Stephens PJ, Tarpey PS, Davies H, et al. The landscape of cancer genes and mutational processes in breast cancer. *Nature* 2012;486(7403):400–4.
4. Greenman C, Wooster R, Futreal PA, Stratton MR, Easton DF. Statistical analysis of pathogenicity of somatic mutations in cancer. *Genetics* 2006;173(4):2187–98.
5. Nik-Zainal S, Van Loo P, Wedge DC, et al. The life history of 21 breast cancers. *Cell* 2012;149(5):994–1007.
6. Avezov E, Frenkel Z, Ehrlich M, Herscovics A, Lederkremer GZ. Endoplasmic reticulum (ER) mannosidase I is compartmentalized and required for N-glycan trimming to Man5-6GlcNAc2 in glycoprotein ER-associated degradation. *Mol Biol Cell* 2008;19(1):216–25.
7. Shaffer KL, Sharma A, Snapp EL, Hegde RS. Regulation of protein compartmentalization expands the diversity of protein function. *Dev Cell* 2005;9(4):545–54.

Figure S1

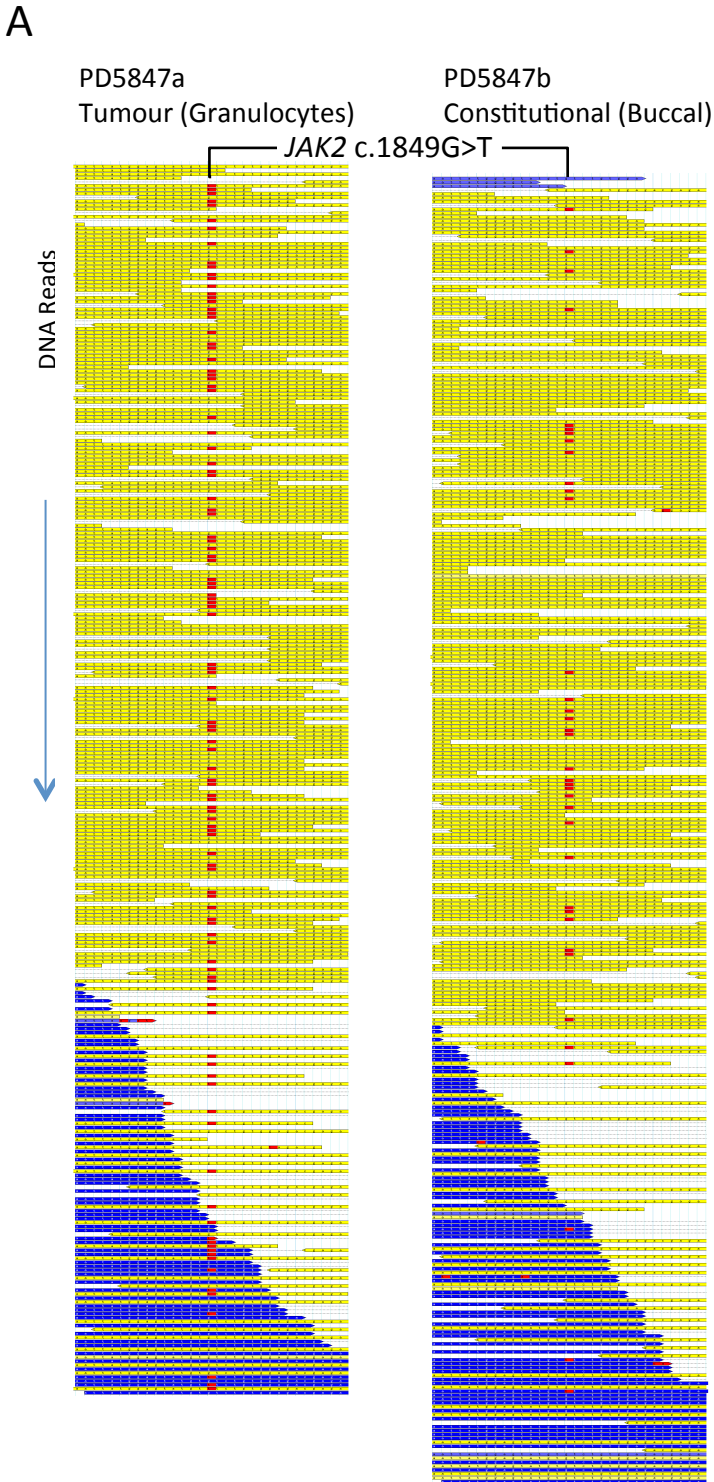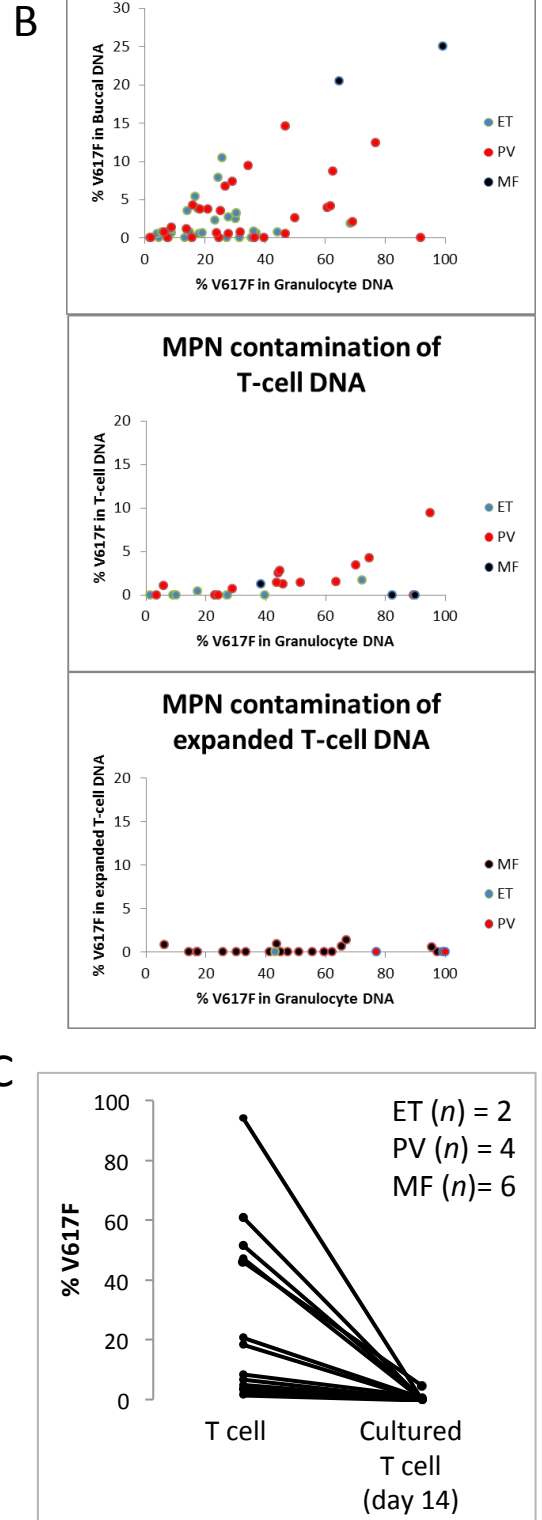

Figure S1 MPN patients with high burden disease frequently show contamination of buccal and T cell DNAs with the  $JAK2^{V617F}$  mutation. (A) Exome sequencing reads showing the  $JAK2^{V617F}$  mutation in 47% of reads in a granulocyte DNA sample and 14.6% of reads in the matched constitutional contaminated buccal DNA. Mismatched bases are highlighted in red, forward and reverse sequence reads are shown in blue and yellow, respectively. (B) Scatter plots showing the relationship between  $JAK2^{V617F}$  allele burden in DNAs isolated from granulocyte versus DNAs from buccal swabs, isolated T-cells or T-cell cultures (assessed by qPCR); ET (blue), PV (red), MF (black) (C) Paired analysis of  $JAK2^{V617F}$  contamination in T-cell isolates and T-cells following 14 days of culture *in vitro*.

Figure S2

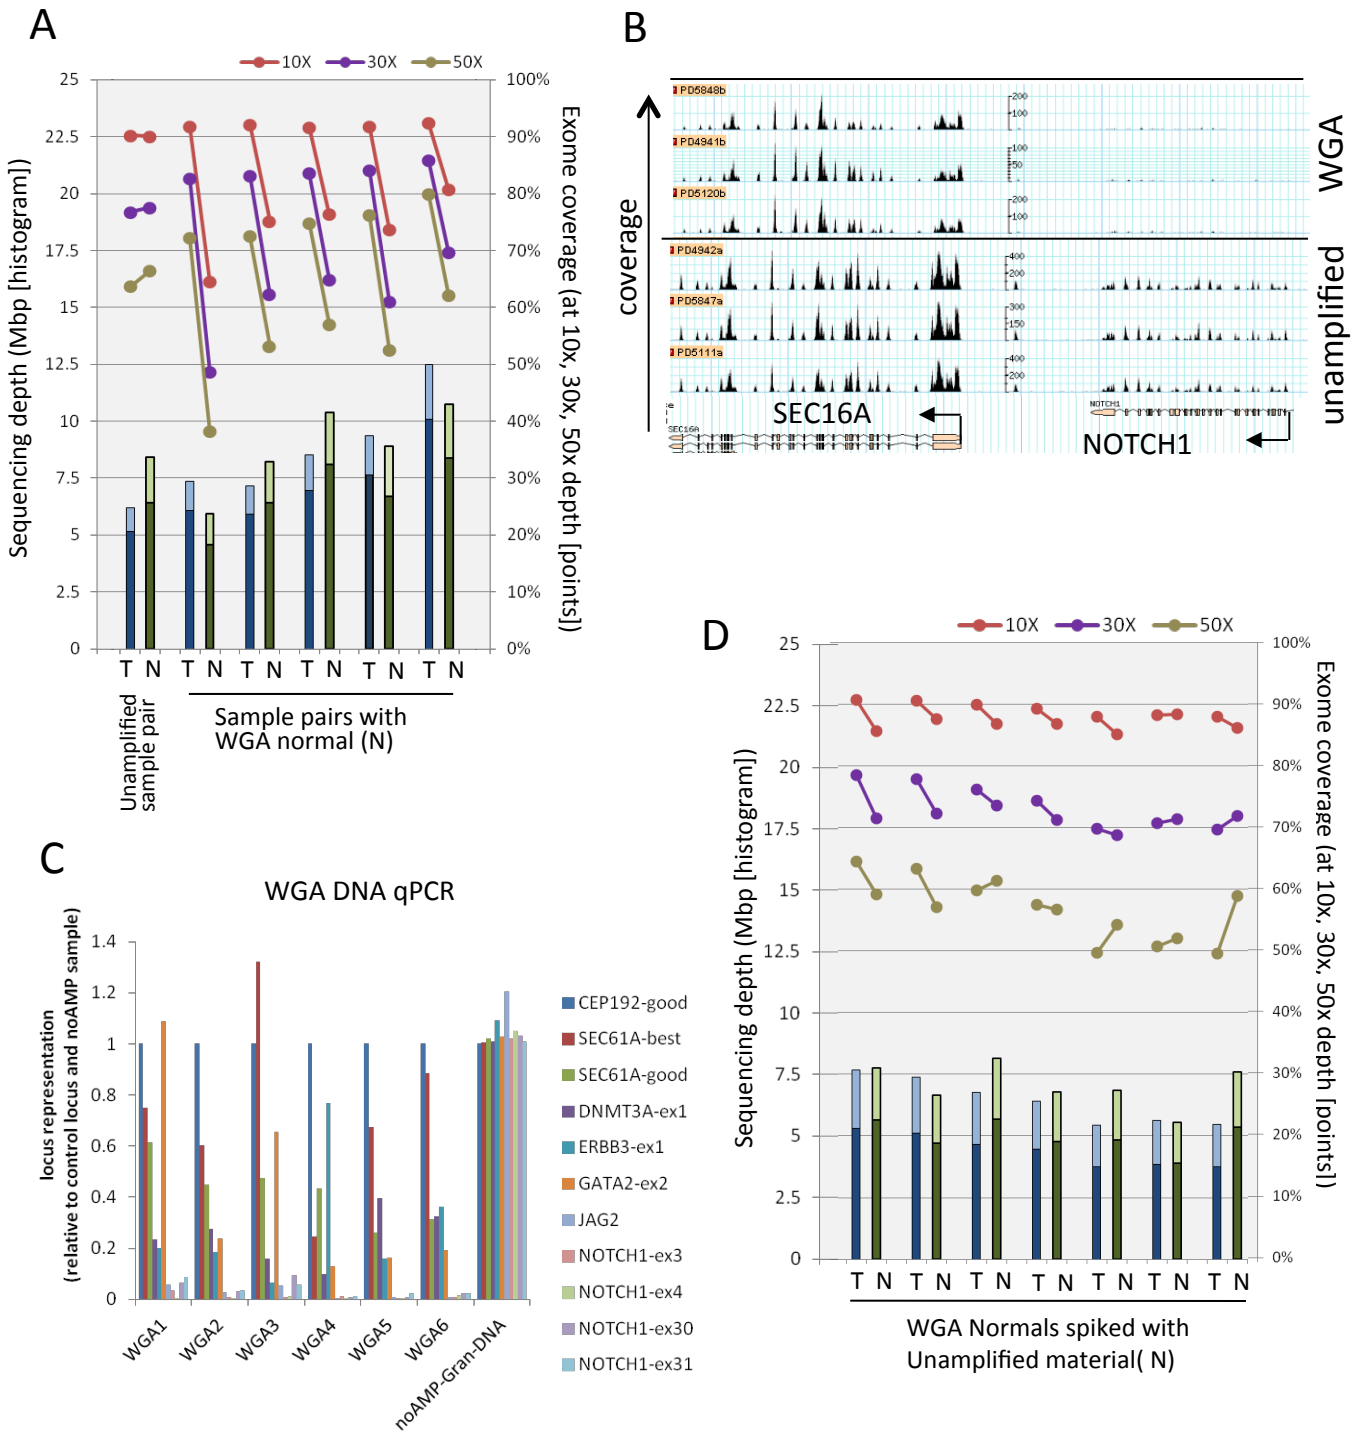

Figure S2 Whole genome amplification (WGA) of DNA prior to exome sequencing consistently results in loss of coverage at specific genomic regions which can be rescued by ‘spiking’ with unamplified DNA. (A) Summary of exome sequencing depth (Mbp, mapped reads) and percentage exome coverage (at 10x, 30x and 50x, as indicated) for one unamplified sample pair and five representative sample pairs with WGA normal samples. Note the consistent loss of coverage in WGA normal samples, which is unrelated to depth of sequencing. (B) Genome browser view of exome sequencing depth for whole genome amplified constitutional DNA samples, compared to unamplified tumour DNAs shows specific regions of lost coverage. (C) Realtime qPCR quantification of loci commonly under-represented in WGA exomes. WGA was performed in 6 independent experiments on the same sample (WGA1-6). Subsequent qPCR highlights regions which are lost stochastically (eg. *GATA2*) and regions always underrepresented by WGA (eg. *JAG2*). (D) Exome sequencing depth and percentage exome coverage for 7 sample pairs with 5-30% unamplified DNA added to normal into WGA normal samples, showing no loss of coverage.

Figure S3

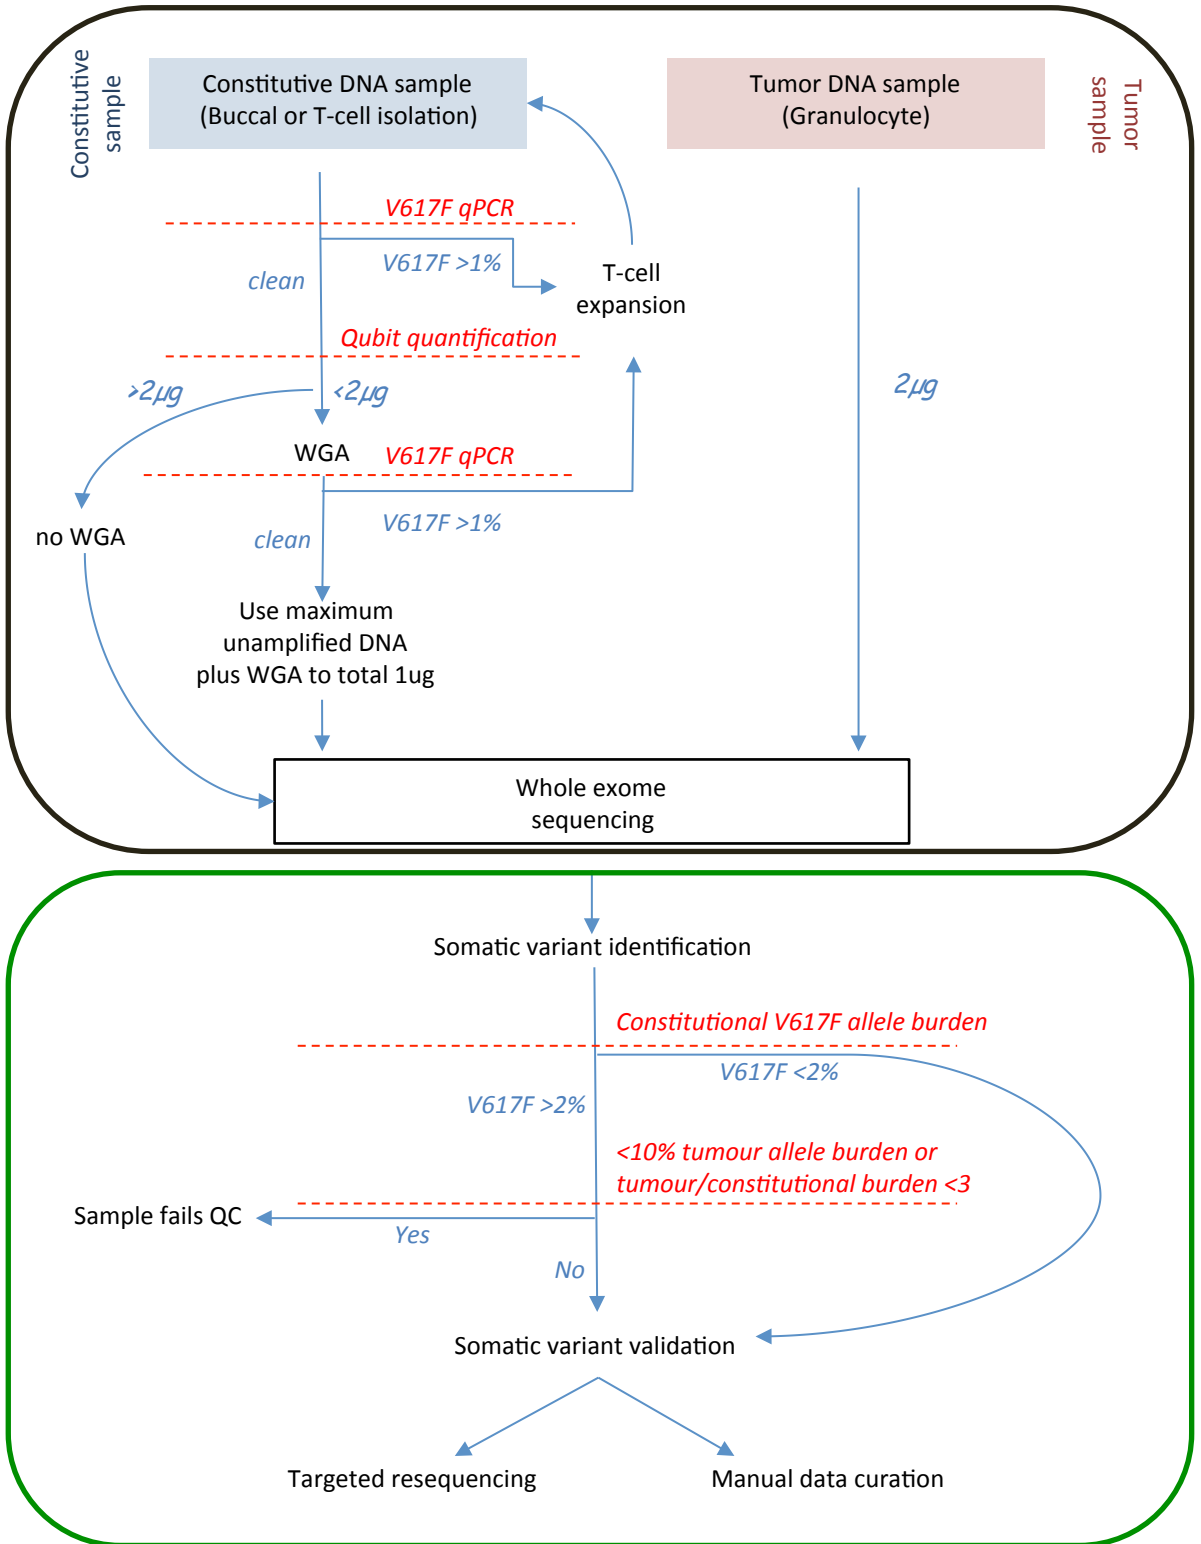

Figure S3 Quality assurance and bioinformatic workflow for all MPN samples prior to submission for exome sequencing (black panel) and following variant identification (green panel) to enable compilation of a high confidence mutation catalogue of MPNs. Tumor DNAs (2ug) were prepared for exome sequencing. For matched constitutional material, buccal, T-cell or cultured T-cell DNAs were prepared. *V617F* allele burden was measured by qPCR at various stages and if levels were >1%, cultured T-cells were prepared. Where constitutional material was limited, whole-genome amplification (WGA) was performed. The maximum amount of unamplified DNA was used and supplemented with WGA DNA to total 2ug. Following exome sequencing and variant identification, further bioinformatic criteria (green panel) as detailed above were applied to ensure only samples where somatic variants could be detected robustly were taken forward for analysis. All variants were validated by either custom bait capture and resequencing, and/or manual curation of the variants.

Figure S4

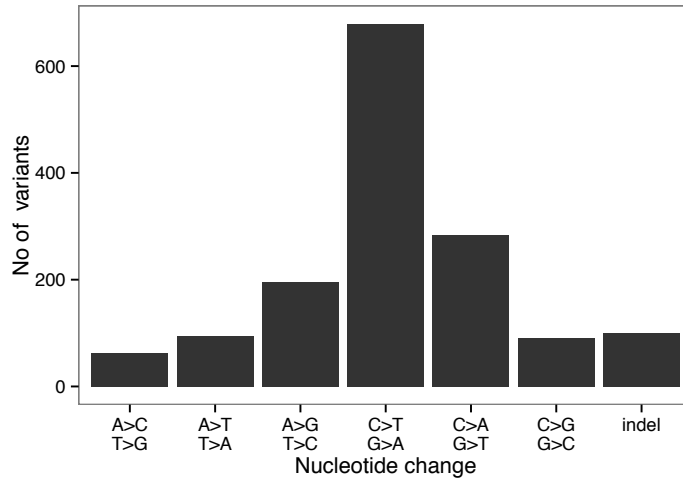

Figure S4 Somatic mutation spectrum in 151 MPN samples. Bar chart showing the nucleotide changes of somatic variants identified by exome sequencing. Indel = insertions or deletions.

Figure S5

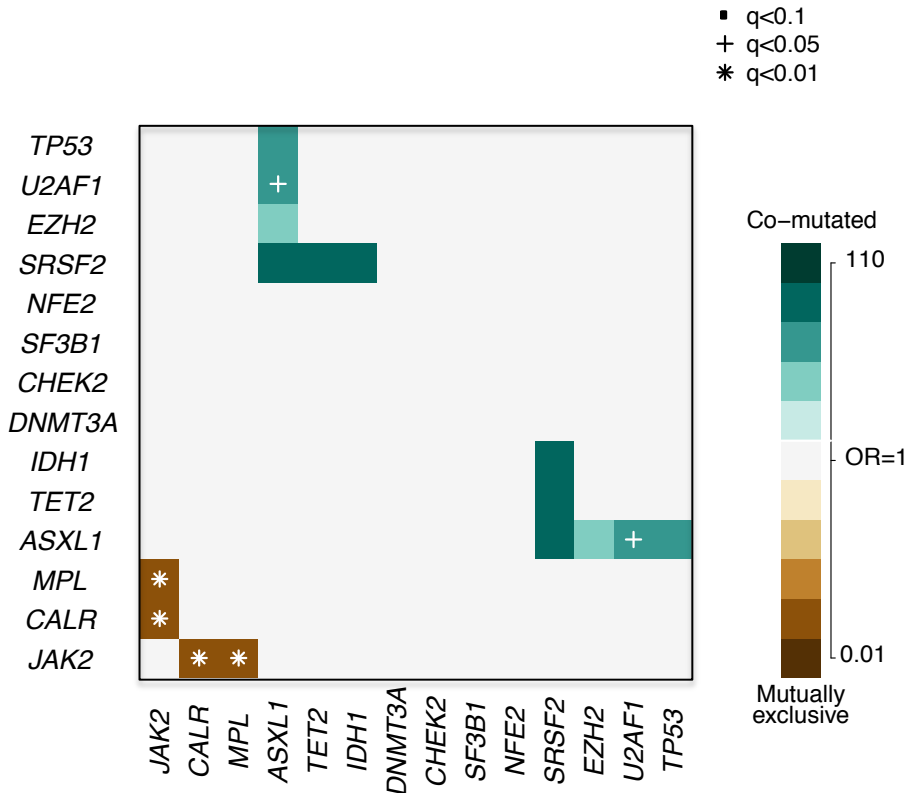

Figure S5 Pairwise associations among MPN cancer genes. Only associations with a p value < 0.05 are shown, and those that have a false discovery rate of less than 0.1 are marked by a white character. Associations are colored by odds ratio. Brown colors depict mutually exclusive gene pairs (one or other mutated, but rarely both together) and blue-green colors gene pairs that are co-mutated more than expected by chance.

Figure S6

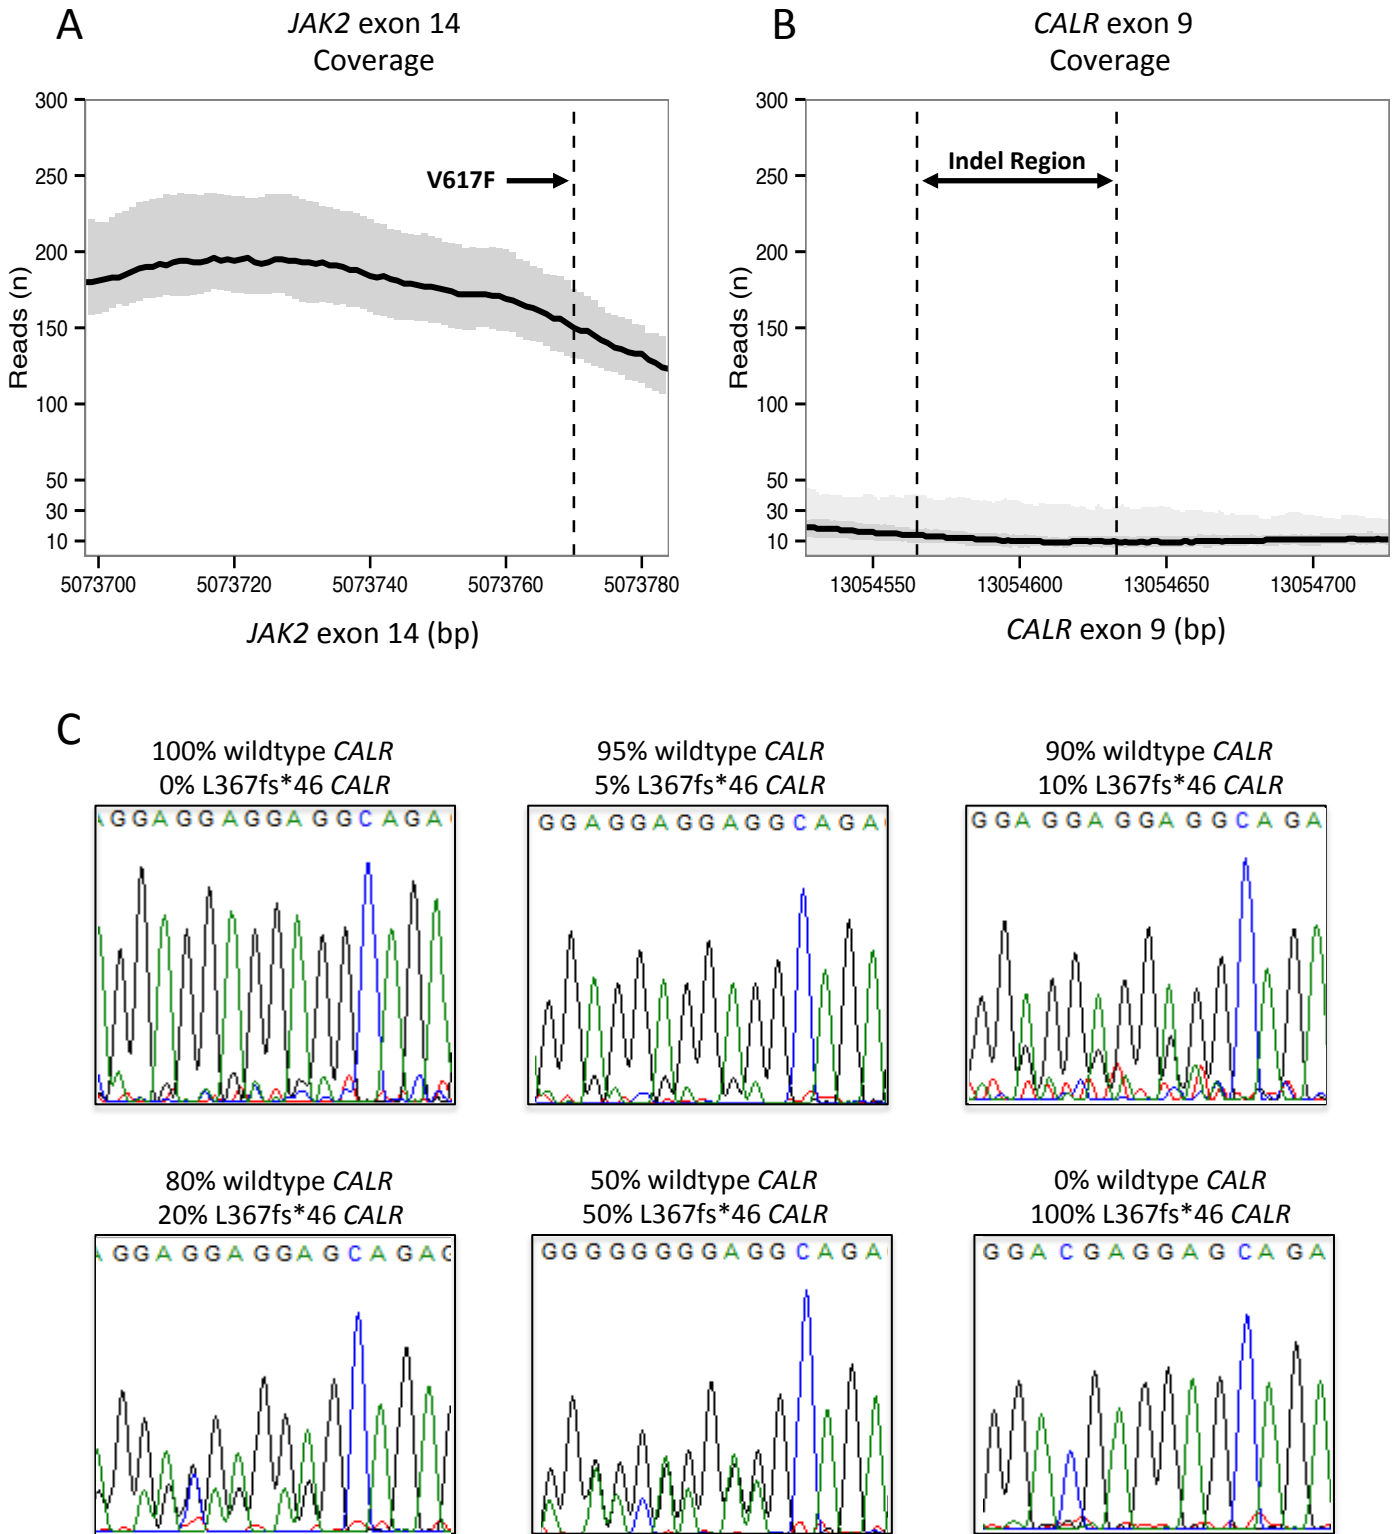

Figure S6 Identification of somatic variants in *CALR*. (a) Exome sequencing coverage across *JAK2*<sup>V617F</sup> in 151 MPN constitutional samples showing read depth at genomic positions across *JAK2* exon 14. Black line shows median coverage, shaded region shows the interquartile range. Position of *JAK2*<sup>V617F</sup> is indicated. (b) Exome sequencing coverage across *CALR* exon 9 in 151 MPN constitutional samples, showing low coverage at this locus. (c) Titration analysis to determine the sensitivity of *CALR* mutation screening using PCR and capillary sequencing. Indicated proportions of *CALR* exon 9 plasmids (wildtype and mutant (L367fs\*46)), were mixed and genotyped. Traces of capillary sequencing show that the mixed sequence (wildtype and mutant) can be seen clearly down to levels of 10% mutant allele fraction.

Figure S7

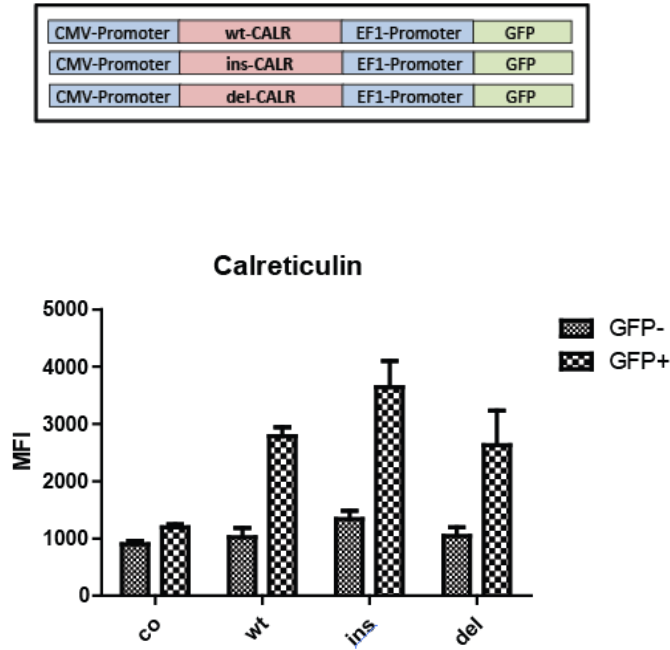

Figure S7. Calreticulin cell surface levels in 32D hematopoietic cells. CALR expression constructs are shown above (co, empty vector; wt, wildtype; ins, CALR K385fs\*47; del, CALR L347fs\*46). Graph shows flow cytometry analysis for CALR cell surface expression in 32D cells transiently transfected with CALR variants (MFI, mean fluorescent intensity; GFP-, untransfected cells; GFP+, transfected cells). 48h after transfection GFP- and GFP+ cells were detected in each sample. GFP- cells from transfected samples had cell surface CALR levels at similar levels to the empty vector control. Transient expression of CALR variants caused an increase in cell surface CALR with no significant differences between wildtype and mutant CALR proteins. Data shows mean + SEMs of three independent experiments.

Figure S8

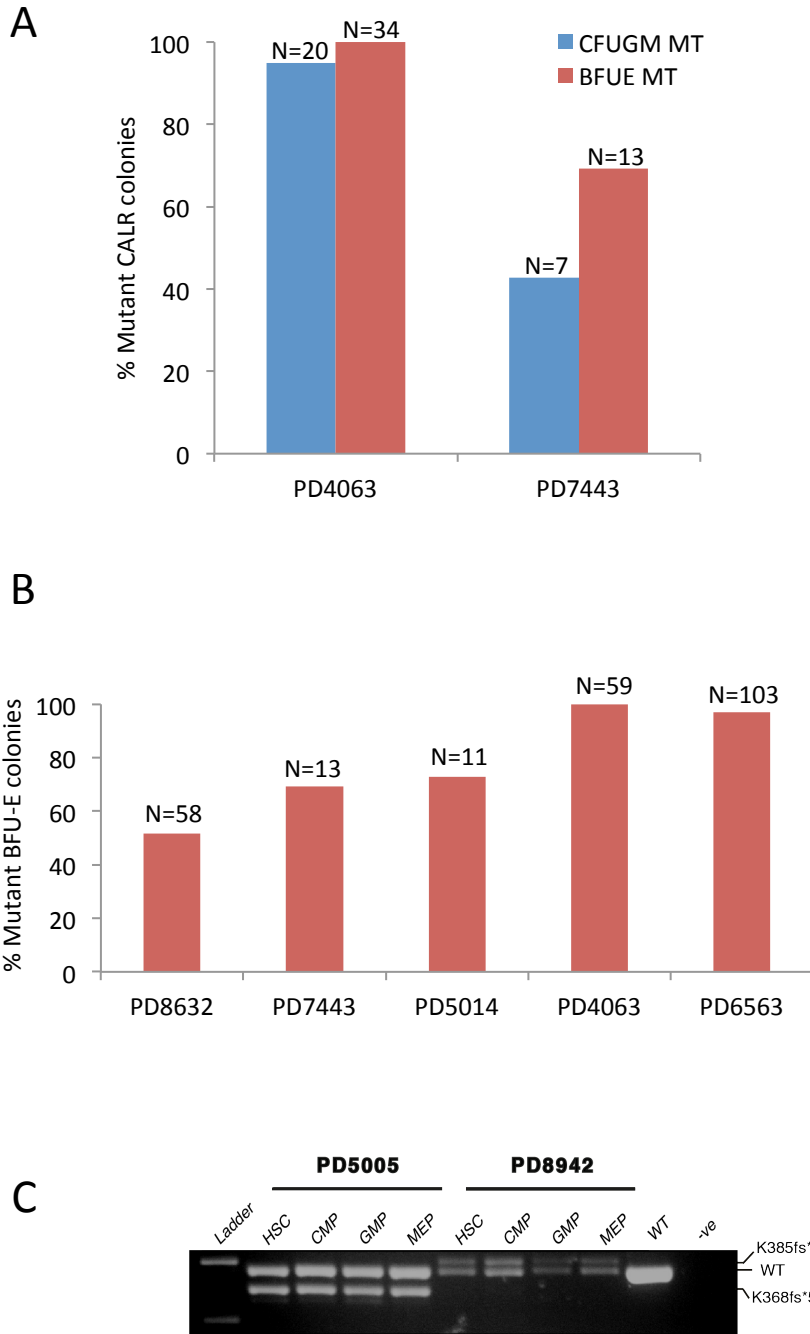

Figure S8 Exome sequencing of granulocytes and hematopoietic colonies *CALR* mutations in multiple lineages. (A) Erythroid (BFU-E) and granulocytic (CFU-GM) colonies were grown from peripheral blood MNCs of two *CALR* mutated patients and discrete clones were plucked at day-10. Data show *CALR* mutated CFU-GM and BFU-Es in both patients. (B) For 5 *CALR* mutated patients identified by exome sequencing of granulocytes, BFU-E clones were grown and genotyped for *CALR*. Together these data show presence of the mutation in granulocyte and erythroid compartments. (C) PCR analysis of *CALR*-mutated hematopoietic colonies grown from the indicated flow sorted hematopoietic stem and progenitor cell fractions obtained from two patients with *CALR* mutations; PD5005 with a 34bp deletion (K368fs\*51); PD8942 with a 5bp insertion (K385fs\*47). Colonies from each cell fraction were pooled and genotyped for *CALR* exon 9. HSC, hematopoietic stem cell; CMP, common myeloid progenitor; GMP, granulocytic-macrophage progenitor; MEP, megakaryocyte-erythroid progenitor; WT, wildtype; -ve, no template control



Figure S9

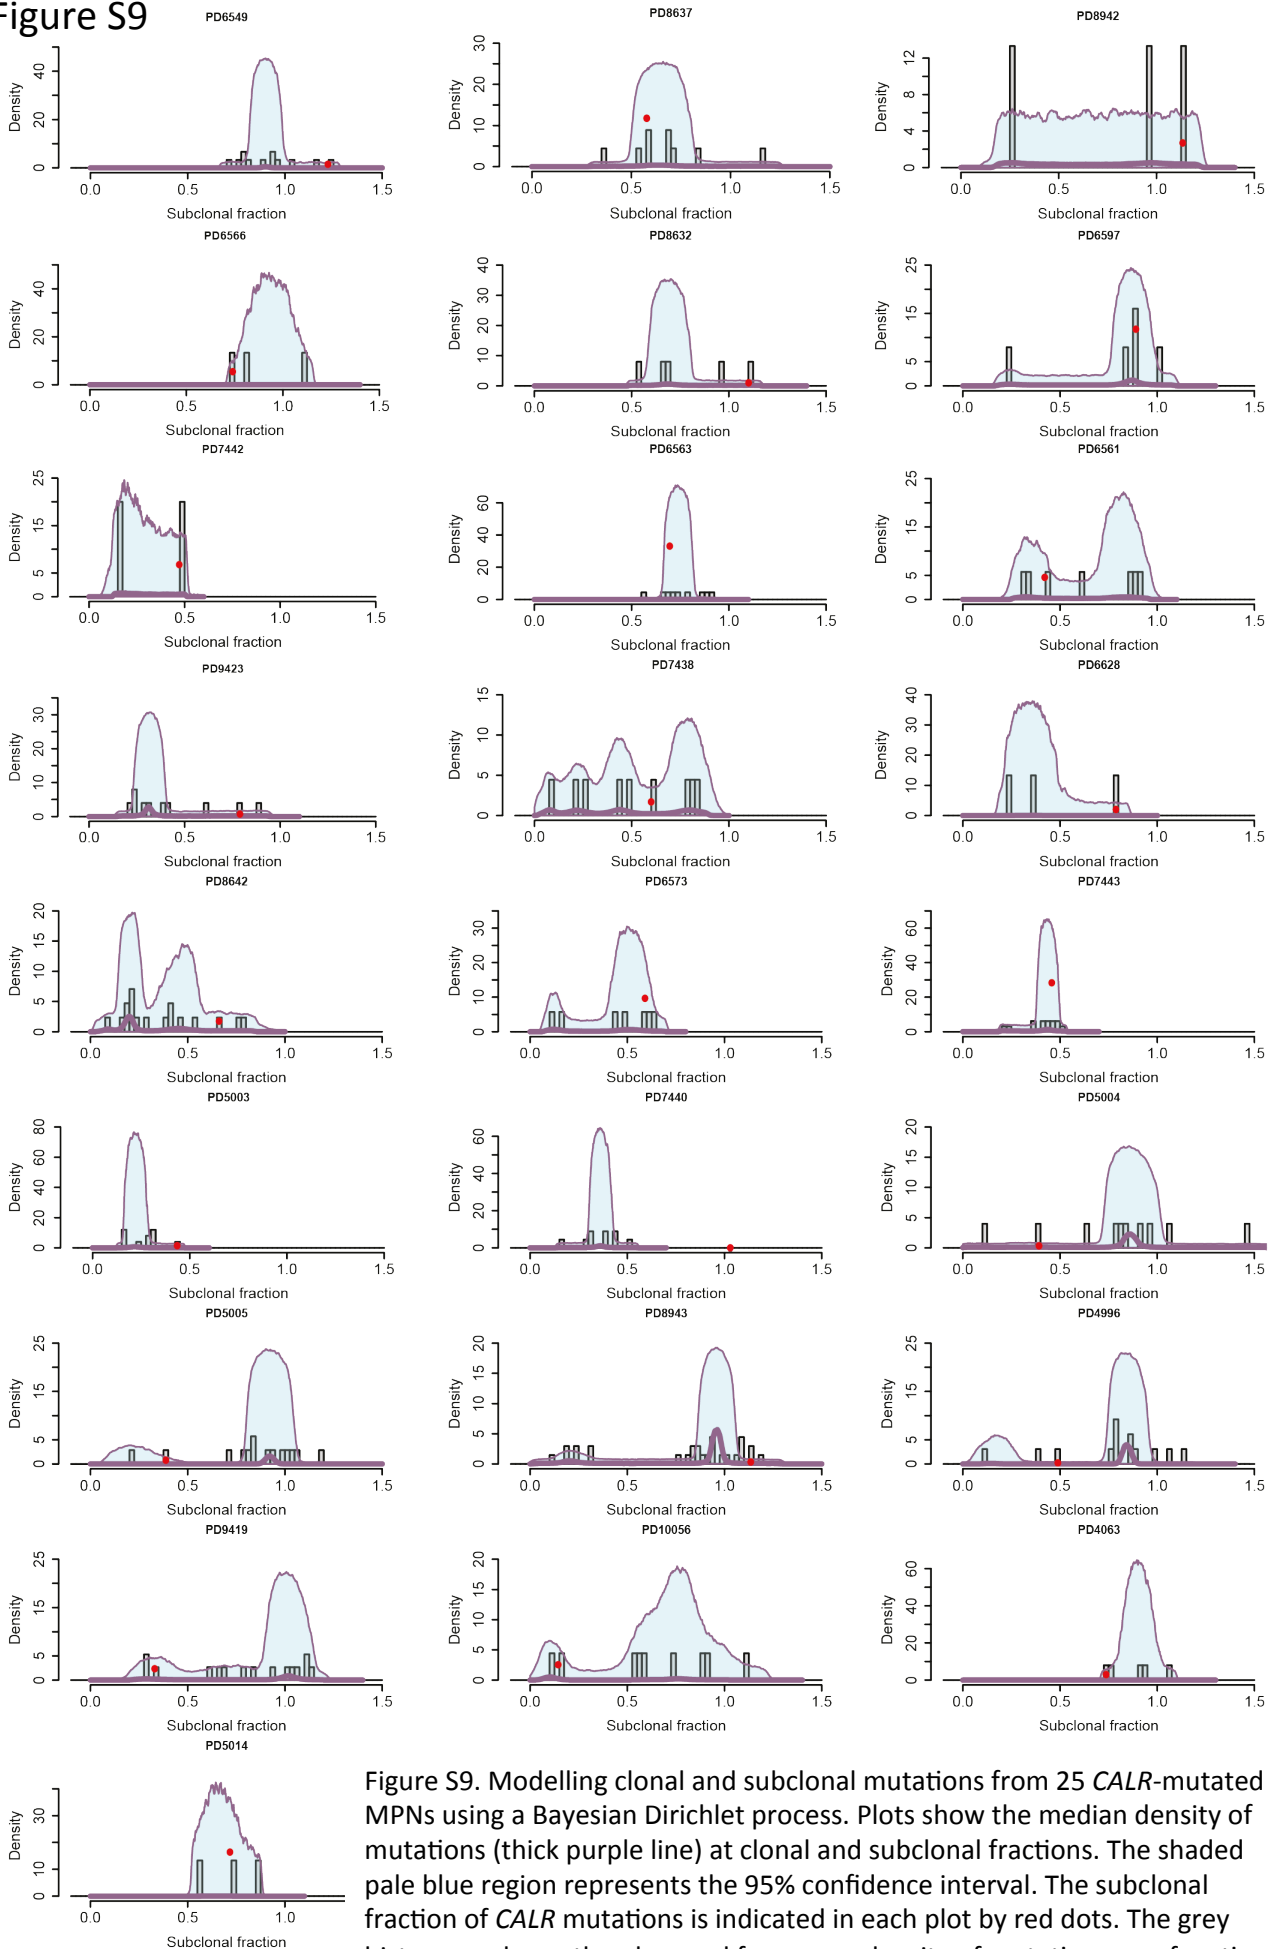

Figure S9. Modelling clonal and subclonal mutations from 25 *CALR*-mutated MPNs using a Bayesian Dirichlet process. Plots show the median density of mutations (thick purple line) at clonal and subclonal fractions. The shaded pale blue region represents the 95% confidence interval. The subclonal fraction of *CALR* mutations is indicated in each plot by red dots. The grey histogram shows the observed frequency density of mutations as a function of the fraction of cells bearing the mutation.

**Table S1. Myeloproliferative neoplasm subtype and mutation status of samples for exome sequencing.**

| <b>Myeloproliferative Neoplasm</b>                | <b>JAK2<br/>mutated</b> | <b>MPL<br/>mutated</b> | <b>JAK2/MPL<br/>unmutated</b> | <b>Total</b> |
|---------------------------------------------------|-------------------------|------------------------|-------------------------------|--------------|
| <i>Polycythemia Vera (PV)</i>                     | 48                      | 0                      | 0                             | 48           |
| <i>Essential Thombocytomia (ET)</i>               | 35                      | 5                      | 22                            | 62           |
| <i>Myelofibrosis (MF)</i>                         | 28                      | 2                      | 9                             | 39           |
| Primary MF                                        | 20                      | 1                      | 5                             | 27           |
| Post ET - MF                                      | 1                       | 1                      | 4                             | 6            |
| Post PV - MF                                      | 7                       | 0                      | 0                             | 6            |
| <i>Myeloproliferative neoplasm_unclassifiable</i> | 2                       | 0                      | 0                             | 2            |
| <b>Total</b>                                      | 113                     | 7                      | 31                            | 151          |

Data show number of patients. JAK2 and MPL status obtained from source information was confirmed by exome sequencing.

**Table S2 Somatic mutations identified by exome sequencing of 151 Myeloproliferative neoplasm samples**

| Variant No | PDID    | MPN Subtype | JAK2/MPL mutation | Chr | Position  | Ref base | Mut base | Germline reads | Germline allele burden (%) | Tumour reads | Tumour allele burden (%) | Gene     | CCDS            | DNA Change        | Protein Change | Type of Change   | Validation Method |
|------------|---------|-------------|-------------------|-----|-----------|----------|----------|----------------|----------------------------|--------------|--------------------------|----------|-----------------|-------------------|----------------|------------------|-------------------|
| 1          | PD10051 | PMF         | JAK2              | 9   | 5073770   | G        | T        | 179            | 0.6                        | 114          | 95.6                     | JAK2     | CCDS6457.1      | c.1849G>T         | p.V617F        | missense         | M                 |
| 2          | PD10051 | PMF         | JAK2              | 5   | 49963910  | A        | C        | 102            | 0.0                        | 74           | 52.7                     | PARP8    | CCDS3954.1      | c.97A>C           | p.R33R         | silent           | M                 |
| 3          | PD10051 | PMF         | JAK2              | 7   | 156555827 | T        | C        | 89             | 0.0                        | 73           | 49.3                     | LMBR1    | CCDS5945.1      | c.594A>G          | p.S198S        | silent           | M                 |
| 4          | PD10051 | PMF         | JAK2              | 18  | 13826416  | C        | T        | 144            | 0.0                        | 255          | 48.2                     | MCSR     | CCDS11868.1     | c.652C>T          | p.R218W        | missense         | M                 |
| 5          | PD10051 | PMF         | JAK2              | 11  | 56058390  | C        | T        | 266            | 1.1                        | 187          | 48.1                     | OR8H1    | CCDS31526.1     | c.149G>A          | p.R50H         | missense         | M                 |
| 6          | PD10051 | PMF         | JAK2              | 4   | 186272630 | G        | T        | 188            | 0.0                        | 144          | 46.5                     | SNX25    | CCDS34116.1     | c.1841G>T         | p.S614I        | missense         | M                 |
| 7          | PD10051 | PMF         | JAK2              | 14  | 76118164  | T        | C        | 127            | 0.0                        | 66           | 45.5                     | C14orf1  | CCDS9845.1      | c.293A>G          | p.Y98C         | missense         | M                 |
| 8          | PD10051 | PMF         | JAK2              | 1   | 167095146 | G        | T        | 37             | 0.0                        | 58           | 43.1                     | DUSP27   | CCDS30932.1     | c.778G>T          | p.A260S        | missense         | M                 |
| 9          | PD10051 | PMF         | JAK2              | 7   | 124511095 | T        | A        | 98             | 0.0                        | 87           | 41.4                     | POT1     | CCDS5793.1      | c.125A>T          | p.D42V         | missense         | M                 |
| 10         | PD10051 | PMF         | JAK2              | 4   | 65275036  | G        | A        | 190            | 0.0                        | 73           | 37.0                     | TECRL    | CCDS33990.1     | c.34C>T           | p.R12C         | missense         | M                 |
| 11         | PD10051 | PMF         | JAK2              | 4   | 126373660 | G        | A        | 43             | 0.0                        | 43           | 30.2                     | FAT4     | CCDS3732.3      | c.11489G>A        | p.R3830H       | missense         | M                 |
| 12         | PD10051 | PMF         | JAK2              | 9   | 125282040 | -        | delTACTC | 58             | 0.0                        | 40           | 20.0                     | OR1J4    | CCDS35122.1     | c.621_625delTACTC | p.L209fs*22    | frameshift       | M                 |
| 13         | PD10051 | PMF         | JAK2              | 7   | 43917086  | G        | A        | 29             | 0.0                        | 27           | 18.5                     | URGCP    | CCDS47578.1     | c.1976C>T         | p.P659L        | missense         | M                 |
| 14         | PD10051 | PMF         | JAK2              | 18  | 29867420  | G        | C        | 58             | 0.0                        | 75           | 12.0                     | FAM59A   | CCDS11905.1     | c.1140C>G         | p.T380T        | silent           | M                 |
| 15         | PD10051 | PMF         | JAK2              | 8   | 21996292  | C        | G        | 33             | 0.0                        | 42           | 9.5                      | REEP4    | CCDS6024.1      | c.568G>C          | p.G190R        | missense         | M                 |
| 16         | PD10052 | PPV-MF      | JAK2              | 9   | 5073770   | G        | T        | 134            | 0.0                        | 125          | 82.4                     | JAK2     | CCDS6457.1      | c.1849G>T         | p.V617F        | missense         | T                 |
| 17         | PD10052 | PPV-MF      | JAK2              | 19  | 39913981  | T        | A        | 20             | 0.0                        | 20           | 50.0                     | PLEKHG2  | CCDS33022.2     | c.2287T>A         | p.S763T        | missense         | M                 |
| 18         | PD10052 | PPV-MF      | JAK2              | 8   | 143763518 | G        | A        | 17             | 0.0                        | 6            | 50.0                     | PSCA     | CCDS47925.1     | c.340G>A          | p.G114S        | missense         | M                 |
| 19         | PD10052 | PPV-MF      | JAK2              | 16  | 23079452  | C        | T        | 105            | 1.0                        | 83           | 48.2                     | USP31    | CCDS10607.1     | c.3974G>A         | p.G1325D       | missense         | M                 |
| 20         | PD10052 | PPV-MF      | JAK2              | 17  | 5114200   | T        | G        | 81             | 0.0                        | 69           | 47.8                     | C17orf87 | CCDS42242.1     | c.334A>C          | p.K112Q        | missense         | M                 |
| 21         | PD10052 | PPV-MF      | JAK2              | 20  | 50715032  | C        | T        | 57             | 0.0                        | 35           | 45.7                     | ZFP64    | CCDS13439.1     | c.858G>A          | p.E286E        | silent           | M                 |
| 22         | PD10052 | PPV-MF      | JAK2              | 17  | 8395641   | T        | A        | 118            | 0.0                        | 83           | 38.6                     | MYH10    | CCDS11144.1     | c.4552A>T         | p.S1518C       | missense         | M                 |
| 23         | PD10052 | PPV-MF      | JAK2              | 16  | 56686927  | C        | G        | 234            | 0.0                        | 132          | 37.1                     | MT1B     | CCDS10765.1     | c.136C>G          | p.Q46E         | missense         | M                 |
| 24         | PD10052 | PPV-MF      | JAK2              | 4   | 165981237 | A        | T        | 195            | 1.0                        | 192          | 37.0                     | TRIM75   | CCDS47160.1     | c.938A>T          | p.K313I        | missense         | M                 |
| 25         | PD10052 | PPV-MF      | JAK2              | 6   | 33631514  | G        | A        | 20             | 0.0                        | 19           | 36.8                     | ITPR3    | CCDS4783.1      | c.1006-1G>A       | p.?            | essential splice | M                 |
| 26         | PD10052 | PPV-MF      | JAK2              | 13  | 99582427  | -        | insA     | 111            | 0.0                        | 74           | 27.0                     | DOCK9    | CCDS45062.1     | c.327_328insT     | p.T110fs*8     | frameshift       | M                 |
| 27         | PD10052 | PPV-MF      | JAK2              | 2   | 97285424  | -        | delIGC   | 33             | 0.0                        | 31           | 25.8                     | KIAA1310 | CCDS46361.1     | c.461_462delIGC   | p.R154fs*8     | frameshift       | M                 |
| 28         | PD10053 | PET-MF      | JAK2              | 2   | 25457242  | C        | T        | 45             | 0.0                        | 51           | 56.9                     | DNMT3A   | CCDS33157.1     | c.2645G>A         | p.R882H        | missense         | T                 |
| 29         | PD10053 | PET-MF      | JAK2              | 17  | 57139957  | C        | G        | 72             | 0.0                        | 50           | 52.0                     | TRIM37   | CCDS32694.1     | c.913G>C          | p.G305R        | missense         | M                 |
| 30         | PD10053 | PET-MF      | JAK2              | 6   | 96651060  | G        | A        | 164            | 0.0                        | 107          | 50.5                     | FUT9     | CCDS5033.1      | c.29G>A           | p.R10H         | missense         | M                 |
| 31         | PD10053 | PET-MF      | JAK2              | 2   | 198266834 | T        | C        | 91             | 1.1                        | 83           | 49.4                     | SF3B1    | CCDS33356.1     | c.2098A>G         | p.K700E        | missense         | M                 |
| 32         | PD10053 | PET-MF      | JAK2              | 5   | 76932764  | C        | G        | 56             | 0.0                        | 78           | 47.4                     | OTP      | CCDS4039.1      | c.329G>C          | p.R110P        | missense         | M                 |
| 33         | PD10053 | PET-MF      | JAK2              | 14  | 64518414  | T        | C        | 55             | 0.0                        | 58           | 46.6                     | SYNE2    | CCDS9761.2      | c.7783T>C         | p.L2595L       | silent           | M                 |
| 34         | PD10053 | PET-MF      | JAK2              | 4   | 106155749 | -        | delC     | 91             | 0.0                        | 43           | 46.5                     | TET2     | CCDS47120.1     | c.650delC         | p.V218fs*32    | frameshift       | M                 |
| 35         | PD10053 | PET-MF      | JAK2              | 1   | 226564918 | A        | G        | 450            | 0.0                        | 292          | 43.2                     | PARP1    | CCDS1554.1      | c.1832T>C         | p.I611T        | missense         | M                 |
| 36         | PD10053 | PET-MF      | JAK2              | 9   | 5073770   | G        | T        | 146            | 0.0                        | 102          | 43.1                     | JAK2     | CCDS6457.1      | c.1849G>T         | p.V617F        | missense         | T                 |
| 37         | PD10053 | PET-MF      | JAK2              | 14  | 73718405  | A        | G        | 28             | 0.0                        | 72           | 41.7                     | PAPLN    | CCDS32114.1     | c.623A>G          | p.N208S        | missense         | M                 |
| 38         | PD10053 | PET-MF      | JAK2              | 17  | 66267152  | C        | T        | 71             | 0.0                        | 86           | 38.4                     | SLC16A6  | CCDS11675.1     | c.1149G>A         | p.W383*        | nonsense         | M                 |
| 39         | PD10053 | PET-MF      | JAK2              | 12  | 40830429  | A        | T        | 140            | 0.0                        | 100          | 37.0                     | MUC19    | ENST00000425730 | c.2039A>T         | p.K680I        | missense         | M                 |
| 40         | PD10053 | PET-MF      | JAK2              | 1   | 181689358 | C        | T        | 71             | 0.0                        | 88           | 11.4                     | CACNA1E  | ENST00000367573 | c.1768C>T         | p.R590W        | missense         | M                 |
| 41         | PD10053 | PET-MF      | JAK2              | 11  | 128333408 | T        | C        | 69             | 1.5                        | 49           | 10.2                     | ETS1     | CCDS44767.1     | c.1238A>G         | p.D413G        | missense         | M                 |
| 42         | PD10053 | PET-MF      | JAK2              | 1   | 248097640 | A        | G        | 93             | 0.0                        | 76           | 9.2                      | OR2A1    | ENST00000318244 | c.570A>G          | p.A190A        | silent           | M                 |
| 43         | PD10053 | PET-MF      | JAK2              | 5   | 140589856 | C        | T        | 139            | 0.0                        | 215          | 7.4                      | PCDHB12  | CCDS4254.1      | c.1377C>T         | p.F459F        | silent           | M                 |
| 44         | PD10053 | PET-MF      | JAK2              | 5   | 149792295 | G        | C        | 134            | 0.0                        | 193          | 6.7                      | CD74     | CCDS47309.1     | c.18C>G           | p.S6R          | missense         | M                 |
| 45         | PD10054 | ET          | JAK2              | 9   | 5073770   | G        | T        | 163            | 0.6                        | 130          | 65.4                     | JAK2     | CCDS6457.1      | c.1849G>T         | p.V617F        | missense         | T                 |
| 46         | PD10054 | ET          | JAK2              | X   | 37534942  | C        | T        | 47             | 0.0                        | 26           | 61.5                     | LANCL3   | CCDS14240.1     | Non-coding        | r.1524c>u      | UTR              | M                 |
| 47         | PD10054 | ET          | JAK2              | 11  | 62285353  | -        | delIT    | 132            | 0.0                        | 160          | 36.9                     | AHNAK    | CCDS31584.1     | c.16536delA       | p.K5512fs*16   | frameshift       | M                 |
| 48         | PD10054 | ET          | JAK2              | 17  | 18541950  | T        | C        | 76             | 0.0                        | 93           | 35.5                     | TBC1D28  | CCDS42273.1     | c.263A>G          | p.Y88C         | missense         | M                 |
| 49         | PD10054 | ET          | JAK2              | 12  | 119588938 | C        | T        | 137            | 0.0                        | 126          | 34.1                     | SRRM4    | CCDS44994.1     | c.1193C>T         | p.T398I        | missense         | M                 |
| 50         | PD10054 | ET          | JAK2              | 2   | 228148555 | G        | A        | 67             | 0.0                        | 77           | 33.8                     | COL4A3   | CCDS42829.1     | c.2729G>A         | p.G910D        | missense         | M                 |

| Variant No | PDID    | MPN Subtype | JAK2/MPL mutation | Chr | Position  | Ref base | Mut base          | Germline reads | Germline allele burden (%) | Tumour reads | Tumour allele burden (%) | Gene            | CCDS            | DNA Change       | Protein Change | Type of Change   | Validation Method |
|------------|---------|-------------|-------------------|-----|-----------|----------|-------------------|----------------|----------------------------|--------------|--------------------------|-----------------|-----------------|------------------|----------------|------------------|-------------------|
| 51         | PD10054 | ET          | JAK2              | 2   | 232458152 | G        | A                 | 40             | 0.0                        | 51           | 33.3                     | C2orf57         | CCDS2487.1      | c.490G>A         | p.A164T        | missense         | M                 |
| 52         | PD10054 | ET          | JAK2              | 9   | 88967850  | _        | delA              | 133            | 0.0                        | 159          | 28.3                     | ZCCHC6          | CCDS35057.1     | c.265delT        | p.W89fs*2      | frameshift       | M                 |
| 53         | PD10054 | ET          | JAK2              | 17  | 79991385  | C        | T                 | 19             | 0.0                        | 35           | 25.7                     | RAC3            | CCDS11798.1     | c.358C>T         | p.R120C        | missense         | M                 |
| 54         | PD10054 | ET          | JAK2              | 10  | 37508043  | G        | A                 | 252            | 0.0                        | 140          | 24.3                     | ANKRD30A        | CCDS7193.1      | c.3235G>A        | p.D1079N       | missense         | M                 |
| 55         | PD10054 | ET          | JAK2              | 12  | 85674055  | _        | insAGA            | 66             | 0.0                        | 63           | 23.8                     | ALX1            | CCDS9028.1      | c.16_17insAGA    | p.K7_F8insK    | inframe          | M                 |
| 56         | PD10054 | ET          | JAK2              | 1   | 38339763  | T        | C                 | 59             | 1.7                        | 51           | 23.5                     | INPP5B          | CCDS41306.1     | c.1853A>G        | p.Q618R        | missense         | M                 |
| 57         | PD10054 | ET          | JAK2              | 8   | 101011507 | C        | T                 | 47             | 0.0                        | 78           | 23.1                     | RGS22           | CCDS43758.1     | c.2932G>A        | p.A978T        | missense         | M                 |
| 58         | PD10054 | ET          | JAK2              | 11  | 49032223  | C        | T                 | 35             | 0.0                        | 45           | 20.0                     | ENSG00000205044 | ENST00000341343 | c.459G>A         | p.A153A        | silent           | M                 |
| 59         | PD10054 | ET          | JAK2              | 15  | 65962151  | C        | T                 | 174            | 0.0                        | 190          | 19.5                     | DENND4A         | CCDS45285.1     | c.4621G>A        | p.A1541T       | missense         | M                 |
| 60         | PD10055 | PPV-MF      | JAK2              | 9   | 5073770   | G        | T                 | 126            | 0.0                        | 110          | 55.5                     | JAK2            | CCDS6457.1      | c.1849G>T        | p.V617F        | missense         | T                 |
| 61         | PD10055 | PPV-MF      | JAK2              | 6   | 65612122  | C        | T                 | 58             | 0.0                        | 54           | 50.0                     | EYS             | CCDS47445.1     | c.2739-9G>A      | p.?            | splice           | M                 |
| 62         | PD10055 | PPV-MF      | JAK2              | X   | 133551230 | C        | A                 | 52             | 0.0                        | 57           | 47.4                     | PHF6            | CCDS14639.1     | c.866C>A         | p.T289N        | missense         | M                 |
| 63         | PD10055 | PPV-MF      | JAK2              | 4   | 106196705 | C        | T                 | 126            | 2.4                        | 196          | 44.9                     | TET2            | CCDS47120.1     | c.5038C>T        | p.Q1680*       | nonsense         | M                 |
| 64         | PD10055 | PPV-MF      | JAK2              | X   | 70514084  | G        | A                 | 73             | 2.7                        | 43           | 44.2                     | NONO            | CCDS14410.1     | c.356G>A         | p.R119Q        | missense         | M                 |
| 65         | PD10055 | PPV-MF      | JAK2              | 14  | 95590575  | A        | C                 | 46             | 0.0                        | 66           | 42.4                     | DICER1          | CCDS9931.1      | c.1334T>G        | p.I445S        | missense         | M                 |
| 66         | PD10055 | PPV-MF      | JAK2              | 4   | 106164775 | G        | T                 | 11             | 0.0                        | 10           | 40.0                     | TET2            | CCDS47120.1     | c.3643G>T        | p.E1215*       | nonsense         | M                 |
| 67         | PD10055 | PPV-MF      | JAK2              | 19  | 10305546  | C        | A                 | 17             | 0.0                        | 10           | 40.0                     | DNMT1           | CCDS45958.1     | c.30G>T          | p.V10V         | silent           | M                 |
| 68         | PD10055 | PPV-MF      | JAK2              | 1   | 158622296 | _        | insT              | 146            | 0.0                        | 106          | 39.6                     | SPTA1           | CCDS41423.1     | c.3335_3336insA  | p.D1112fs*10   | frameshift       | M                 |
| 69         | PD10055 | PPV-MF      | JAK2              | 6   | 63921761  | C        | T                 | 63             | 0.0                        | 51           | 39.2                     | FKBP1C          | ENST00000370659 | c.300C>T         | p.F100F        | silent           | M                 |
| 70         | PD10055 | PPV-MF      | JAK2              | 8   | 3245147   | C        | T                 | 27             | 0.0                        | 45           | 37.8                     | CSMD1           | ENST00000318252 | c.1838G>A        | p.R613H        | missense         | M                 |
| 71         | PD10055 | PPV-MF      | JAK2              | 1   | 115256535 | G        | T                 | 102            | 2.0                        | 112          | 33.0                     | NRAS            | CCDS877.1       | c.176C>A         | p.A59D         | missense         | M                 |
| 72         | PD10056 | PET-MF      | unmutated         | 2   | 29449779  | C        | G                 | 67             | 0.0                        | 84           | 56.0                     | ALK             | CCDS33172.1     | c.3067+9G>C      | p.?            | splice           | M                 |
| 73         | PD10056 | PET-MF      | unmutated         | 21  | 45994307  | _        | delC              | 122            | 0.0                        | 138          | 45.7                     | KRTAP10-4       | CCDS42957.1     | c.672delC        | p.Q225fs*102   | frameshift       | M                 |
| 74         | PD10056 | PET-MF      | unmutated         | X   | 32862919  | C        | T                 | 45             | 0.0                        | 40           | 45.0                     | DMD             | CCDS14233.1     | c.245G>A         | p.R82Q         | missense         | M                 |
| 75         | PD10056 | PET-MF      | unmutated         | 1   | 32201977  | C        | T                 | 160            | 0.0                        | 95           | 36.8                     | BAI2            | CCDS346.2       | c.3145G>A        | p.V1049M       | missense         | M                 |
| 76         | PD10056 | PET-MF      | unmutated         | 16  | 66434681  | G        | A                 | 92             | 0.0                        | 90           | 28.9                     | CDH5            | CCDS10804.1     | c.1599G>A        | p.T533T        | silent           | M                 |
| 77         | PD10056 | PET-MF      | unmutated         | 21  | 36252849  | C        | A                 | 63             | 0.0                        | 49           | 28.6                     | RUNX1           | CCDS13639.1     | c.508+5G>T       | p.?            | essential splice | M                 |
| 78         | PD10056 | PET-MF      | unmutated         | 12  | 69042539  | G        | A                 | 145            | 0.0                        | 91           | 27.5                     | RAP1B           | CCDS8984.1      | c.35G>A          | p.G12E         | missense         | M                 |
| 79         | PD10056 | PET-MF      | unmutated         | 3   | 164758870 | C        | A                 | 182            | 0.6                        | 129          | 5.4                      | SI              | CCDS3196.1      | c.2017G>T        | p.A673S        | missense         | M                 |
| 80         | PD10056 | PET-MF      | unmutated         | 19  | 13054565  | _        | delGCAGA<42>AGGAG | 13             | 15.4                       | 13           | 7.7                      | CALR            | CCDS12288.1     | c.1092_1143del52 | p.L367fs*46    | frameshift       | M C               |
| 81         | PD10057 | PMF         | JAK2              | 9   | 5073770   | G        | T                 | 155            | 0.0                        | 125          | 25.6                     | JAK2            | CCDS6457.1      | c.1849G>T        | p.V617F        | missense         | T                 |
| 82         | PD10057 | PMF         | JAK2              | 1   | 236882190 | A        | T                 | 40             | 0.0                        | 52           | 21.2                     | ACTN2           | CCDS1613.1      | c.242-4A>T       | p.?            | splice           | M                 |
| 83         | PD10057 | PMF         | JAK2              | 5   | 170834699 | A        | C                 | 62             | 0.0                        | 49           | 20.4                     | NPM1            | CCDS4376.1      | c.772-5A>C       | p.?            | splice           | M                 |
| 84         | PD10058 | PMF         | JAK2              | 9   | 5073770   | G        | T                 | 116            | 0.0                        | 111          | 97.3                     | JAK2            | CCDS6457.1      | c.1849G>T        | p.V617F        | missense         | T                 |
| 85         | PD10058 | PMF         | JAK2              | 7   | 30963734  | C        | A                 | 12             | 0.0                        | 11           | 54.6                     | AQP1            | CCDS5431.1      | Non-coding       | r.1355c>a      | UTR              | M                 |
| 86         | PD10058 | PMF         | JAK2              | 1   | 207263650 | C        | T                 | 39             | 0.0                        | 36           | 52.8                     | C4BPB           | CCDS1476.1      | c.59-3C>T        | p.?            | splice           | M                 |
| 87         | PD10058 | PMF         | JAK2              | 8   | 41166638  | _        | delGCT            | 6              | 0.0                        | 9            | 33.3                     | SFRP1           | CCDS34886.1     | c.39_41delAGC    | p.A14delA      | inframe          | M                 |
| 88         | PD10058 | PMF         | JAK2              | 12  | 45410053  | G        | A                 | 85             | 0.0                        | 77           | 27.3                     | DBX2            | CCDS31781.1     | Non-coding       | r.1208c>u      | UTR              | M                 |
| 89         | PD10058 | PMF         | JAK2              | 19  | 57890074  | T        | C                 | 141            | 0.7                        | 76           | 26.3                     | ZNF547          | CCDS33131.1     | Non-coding       | r.1923u>c      | UTR              | M                 |
| 90         | PD10058 | PMF         | JAK2              | 9   | 79634805  | G        | T                 | 30             | 0.0                        | 44           | 22.7                     | FOXB2           | CCDS35045.1     | c.235G>T         | p.D79Y         | missense         | M                 |
| 91         | PD10058 | PMF         | JAK2              | 17  | 21825984  | G        | A                 | 50             | 0.0                        | 32           | 21.9                     | FAM27L          | ENST00000426869 | c.4G>A           | p.V2I          | missense         | M                 |
| 92         | PD10058 | PMF         | JAK2              | 17  | 40874827  | A        | T                 | 49             | 0.0                        | 49           | 18.4                     | EZH1            | CCDS32659.1     | c.473T>A         | p.V158D        | missense         | M                 |
| 93         | PD10058 | PMF         | JAK2              | 2   | 238285995 | G        | C                 | 54             | 0.0                        | 56           | 17.9                     | COL6A3          | CCDS33412.1     | c.2498-8C>G      | p.?            | splice           | M                 |
| 94         | PD10058 | PMF         | JAK2              | 13  | 23930028  | A        | T                 | 60             | 0.0                        | 59           | 17.0                     | SACS            | CCDS9300.2      | c.723T>A         | p.S241R        | missense         | M                 |
| 95         | PD10058 | PMF         | JAK2              | 4   | 104032115 | C        | T                 | 177            | 0.0                        | 142          | 16.9                     | CENPE           | CCDS34042.1     | c.7594G>A        | p.G2532S       | missense         | M                 |
| 96         | PD10058 | PMF         | JAK2              | 4   | 106158463 | _        | insCT             | 143            | 0.0                        | 114          | 16.7                     | TET2            | CCDS47120.1     | c.3364_3365insCT | p.P1123fs*15   | frameshift       | M                 |
| 97         | PD10058 | PMF         | JAK2              | 1   | 17314721  | C        | T                 | 50             | 0.0                        | 76           | 15.8                     | ATP13A2         | CCDS175.1       | c.2771G>A        | p.R924H        | missense         | M                 |
| 98         | PD10058 | PMF         | JAK2              | 17  | 29231299  | T        | C                 | 77             | 0.0                        | 59           | 15.3                     | C17orf42        | CCDS42291.1     | c.280A>G         | p.R94G         | missense         | M                 |
| 99         | PD10058 | PMF         | JAK2              | 1   | 10412688  | G        | A                 | 123            | 0.0                        | 75           | 14.7                     | KIF1B           | CCDS111.1       | c.3812-1G>A      | p.?            | essential splice | M                 |
| 100        | PD10058 | PMF         | JAK2              | 10  | 47087574  | A        | G                 | 65             | 0.0                        | 60           | 8.3                      | PPYR1           | CCDS31193.1     | c.791A>G         | p.N264S        | missense         | M                 |
| 101        | PD10059 | PMF         | JAK2              | 19  | 45649503  | _        | insGTAA           | 1              | 0.0                        | 6            | 66.7                     | LRR68           | ENST00000422370 | c.770_771insGTAA | p.259fs*50     | frameshift       | M                 |
| 102        | PD10059 | PMF         | JAK2              | 15  | 52476780  | G        | A                 | 62             | 0.0                        | 69           | 56.5                     | GNB5            | CCDS10149.1     | c.94C>T          | p.Q32*         | nonsense         | M                 |

| Variant No | PDID    | MPN Subtype | JAK2/MPL mutation | Chr | Position  | Ref base | Mut base          | Germline reads | Germline allele burden (%) | Tumour reads | Tumour allele burden (%) | Gene     | CCDS            | DNA Change            | Protein Change       | Type of Change | Validation Method |
|------------|---------|-------------|-------------------|-----|-----------|----------|-------------------|----------------|----------------------------|--------------|--------------------------|----------|-----------------|-----------------------|----------------------|----------------|-------------------|
| 103        | PD10059 | PMF         | JAK2              | 2   | 18745146  | A        | C                 | 80             | 0.0                        | 84           | 53.6                     | NT5C1B   | CCDS33150.1     | c.1749T>G             | p.F583L              | missense       | M                 |
| 104        | PD10059 | PMF         | JAK2              | 9   | 71679928  | A        | G                 | 44             | 2.3                        | 56           | 51.8                     | FXN      | CCDS6626.1      | c.459A>G              | p.Q153Q              | silent         | M                 |
| 105        | PD10059 | PMF         | JAK2              | 5   | 127674688 | T        | C                 | 82             | 1.2                        | 73           | 49.3                     | FBN2     | CCDS34222.1     | c.3409A>G             | p.S1137G             | missense       | M                 |
| 106        | PD10059 | PMF         | JAK2              | 8   | 104897565 | A        | G                 | 71             | 1.4                        | 45           | 46.7                     | RIMS2    | ENST00000436393 | c.72A>G               | p.R24R               | silent         | M                 |
| 107        | PD10059 | PMF         | JAK2              | 3   | 182756815 | T        | C                 | 49             | 0.0                        | 35           | 45.7                     | MCCC1    | CCDS3241.1      | c.1376A>G             | p.N459S              | missense       | M                 |
| 108        | PD10059 | PMF         | JAK2              | 19  | 41095087  | -        | delGAGGA<16>GGAGG | 2              | 0.0                        | 9            | 44.4                     | SHKBP1   | CCDS12560.1     | c.1589+3_1589+28del26 | p.?                  | frameshift     | M                 |
| 109        | PD10059 | PMF         | JAK2              | 7   | 98805086  | G        | A                 | 162            | 0.0                        | 108          | 42.6                     | KPNA7    | CCDS47651.1     | c.4C>T                | p.P2S                | missense       | M                 |
| 110        | PD10059 | PMF         | JAK2              | 7   | 45717813  | C        | T                 | 134            | 0.0                        | 127          | 42.5                     | ADCY1    | CCDS34631.1     | c.1849C>T             | p.L617F              | missense       | M                 |
| 111        | PD10059 | PMF         | JAK2              | 12  | 111779646 | C        | T                 | 68             | 0.0                        | 52           | 42.3                     | CUX2     | CCDS41837.1     | c.3448C>T             | p.R1150C             | missense       | M                 |
| 112        | PD10059 | PMF         | JAK2              | 9   | 114180255 | C        | T                 | 56             | 0.0                        | 59           | 39.0                     | KIAA0368 | CCDS48006.1     | c.2125G>A             | p.V709I              | missense       | M                 |
| 113        | PD10059 | PMF         | JAK2              | 12  | 114261086 | G        | A                 | 39             | 0.0                        | 36           | 36.1                     | RBM19    | CCDS9172.1      | c.2826C>T             | p.I942I              | silent         | M                 |
| 114        | PD10059 | PMF         | JAK2              | 22  | 29924417  | T        | C                 | 107            | 0.0                        | 185          | 35.1                     | THOC5    | CCDS13859.1     | c.964A>G              | p.T322A              | missense       | M                 |
| 115        | PD10059 | PMF         | JAK2              | 10  | 106974205 | G        | A                 | 147            | 0.0                        | 81           | 34.6                     | SORCS3   | CCDS7558.1      | c.2381G>A             | p.R794Q              | missense       | M                 |
| 116        | PD10059 | PMF         | JAK2              | 21  | 44524456  | G        | T                 | 40             | 0.0                        | 50           | 34.0                     | U2AF1    | CCDS13694.1     | c.101C>A              | p.S34Y               | missense       | M                 |
| 117        | PD10059 | PMF         | JAK2              | 9   | 5073770   | G        | T                 | 135            | 0.0                        | 96           | 33.3                     | JAK2     | CCDS6457.1      | c.1849G>T             | p.V617F              | missense       | T                 |
| 118        | PD10059 | PMF         | JAK2              | 1   | 27215489  | A        | G                 | 180            | 0.0                        | 271          | 5.2                      | GPN2     | CCDS289.1       | c.539T>C              | p.M180T              | missense       | M                 |
| 119        | PD10060 | PMF         | JAK2              | 9   | 5073770   | G        | T                 | 146            | 0.0                        | 185          | 59.5                     | JAK2     | CCDS6457.1      | c.1849G>T             | p.V617F              | missense       | T                 |
| 120        | PD10060 | PMF         | JAK2              | 5   | 22078546  | C        | T                 | 41             | 0.0                        | 50           | 48.0                     | CDH12    | CCDS3890.1      | c.231+9G>A            | p.?                  | splice         | M                 |
| 121        | PD10060 | PMF         | JAK2              | 1   | 46497255  | C        | T                 | 33             | 0.0                        | 20           | 45.0                     | MAST2    | CCDS41326.1     | c.3185C>T             | p.S1062L             | missense       | M                 |
| 122        | PD10060 | PMF         | JAK2              | 4   | 185646105 | C        | A                 | 64             | 0.0                        | 49           | 42.9                     | MLF1P    | CCDS3838.1      | c.320+6G>T            | p.?                  | splice         | M                 |
| 123        | PD10060 | PMF         | JAK2              | 11  | 17448654  | G        | T                 | 39             | 0.0                        | 42           | 40.5                     | ABCC8    | CCDS31437.1     | c.2164C>A             | p.L722I              | missense       | M                 |
| 124        | PD10060 | PMF         | JAK2              | 16  | 70531195  | C        | T                 | 86             | 0.0                        | 106          | 33.0                     | COG4     | CCDS10892.2     | c.1410G>A             | p.L470L              | silent         | M                 |
| 125        | PD10060 | PMF         | JAK2              | 2   | 110881429 | G        | T                 | 35             | 2.9                        | 48           | 29.2                     | NPHP1    | CCDS2086.1      | c.2141C>A             | p.P714H              | missense       | M                 |
| 126        | PD10060 | PMF         | JAK2              | 10  | 73053163  | C        | T                 | 45             | 0.0                        | 44           | 27.3                     | UNC5B    | CCDS7309.1      | c.1774C>T             | p.P592S              | missense       | M                 |
| 127        | PD10060 | PMF         | JAK2              | 11  | 61094359  | G        | A                 | 193            | 0.0                        | 119          | 13.5                     | DDB1     | CCDS31576.1     | c.556C>T              | p.Q186*              | nonsense       | M                 |
| 128        | PD10061 | PMF         | JAK2              | X   | 69498364  | G        | A                 | 22             | 0.0                        | 18           | 77.8                     | ARR3     | CCDS14399.1     | c.778G>A              | p.A260T              | missense       | M                 |
| 129        | PD10061 | PMF         | JAK2              | 9   | 5073770   | G        | T                 | 147            | 1.4                        | 115          | 67.0                     | JAK2     | CCDS6457.1      | c.1849G>T             | p.V617F              | missense       | T                 |
| 130        | PD10061 | PMF         | JAK2              | 4   | 106164913 | C        | T                 | 36             | 2.8                        | 19           | 63.2                     | TET2     | CCDS47120.1     | c.3781C>T             | p.R1261C             | missense       | M                 |
| 131        | PD10061 | PMF         | JAK2              | 22  | 24177101  | C        | G                 | 21             | 0.0                        | 24           | 62.5                     | DERL3    | CCDS46672.1     | c.633G>C              | p.K211N              | missense       | M                 |
| 132        | PD10061 | PMF         | JAK2              | 3   | 156763572 | G        | A                 | 76             | 0.0                        | 40           | 47.5                     | LEKR1    | CCDS33883.1     | Non-coding            | r.2535g>a            | UTR            | M                 |
| 133        | PD10061 | PMF         | JAK2              | 4   | 186065924 | C        | G                 | 57             | 0.0                        | 69           | 44.9                     | SLC25A4  | CCDS34114.1     | c.118C>G              | p.H40D               | missense       | M                 |
| 134        | PD10061 | PMF         | JAK2              | 6   | 110763614 | G        | A                 | 84             | 0.0                        | 74           | 43.2                     | SLC22A16 | CCDS5084.1      | c.1016C>T             | p.T339I              | missense       | M                 |
| 135        | PD10061 | PMF         | JAK2              | 8   | 17601285  | G        | A                 | 67             | 0.0                        | 63           | 41.3                     | MTUS1    | CCDS43717.1     | c.2115C>T             | p.T705T              | silent         | M                 |
| 136        | PD10061 | PMF         | JAK2              | 19  | 33288793  | G        | C                 | 60             | 0.0                        | 44           | 40.9                     | TDRD12   | ENST00000444215 | c.1626G>C             | p.R542S              | missense       | M                 |
| 137        | PD10061 | PMF         | JAK2              | 20  | 31021439  | G        | T                 | 167            | 0.6                        | 173          | 38.7                     | ASXL1    | CCDS13201.1     | c.1438G>T             | p.E480*              | nonsense       | M                 |
| 138        | PD10061 | PMF         | JAK2              | 5   | 140531475 | G        | A                 | 78             | 0.0                        | 71           | 38.0                     | PCDHB6   | CCDS4248.1      | c.1637G>A             | p.R546H              | missense       | M                 |
| 139        | PD10061 | PMF         | JAK2              | 19  | 50550234  | A        | T                 | 69             | 4.4                        | 56           | 35.7                     | ZNF473   | CCDS33077.1     | c.2534A>T             | p.Q845L              | missense       | M                 |
| 140        | PD10061 | PMF         | JAK2              | 10  | 114181736 | C        | T                 | 74             | 0.0                        | 77           | 33.8                     | ACSL5    | CCDS7572.1      | c.1587C>T             | p.Y529Y              | silent         | M                 |
| 141        | PD10061 | PMF         | JAK2              | 7   | 123594038 | C        | A                 | 131            | 1.5                        | 96           | 32.3                     | SPAM1    | CCDS5790.1      | c.414C>A              | p.D138E              | missense       | M                 |
| 142        | PD10061 | PMF         | JAK2              | 17  | 74732959  | G        | A                 | 16             | 0.0                        | 21           | 28.6                     | SFRS2    | CCDS11749.1     | c.284C>T              | p.P95L               | missense       | M                 |
| 143        | PD10061 | PMF         | JAK2              | 2   | 209104604 | G        | A                 | 77             | 0.0                        | 64           | 14.1                     | IDH1     | CCDS2381.1      | c.974C>T              | p.T325M              | missense       | M                 |
| 144        | PD10061 | PMF         | JAK2              | 4   | 106180784 | G        | A                 | 130            | 0.0                        | 102          | 9.8                      | TET2     | CCDS47120.1     | c.3812G>A             | p.C1271Y             | missense       | M                 |
| 145        | PD10062 | PMF         | JAK2              | 9   | 5073770   | G        | T                 | 151            | 1.3                        | 146          | 38.4                     | JAK2     | CCDS6457.1      | c.1849G>T             | p.V617F              | missense       | T                 |
| 146        | PD10062 | PMF         | JAK2              | 17  | 27425877  | T        | C                 | 27             | 0.0                        | 45           | 20.0                     | MYO18A   | CCDS45642.1     | c.3747A>G             | p.V1249V             | silent         | M                 |
| 147        | PD10062 | PMF         | JAK2              | 19  | 33202719  | G        | A                 | 56             | 0.0                        | 63           | 19.1                     | NUDT19   | CCDS42543.1     | c.984G>A              | p.K328K              | silent         | M                 |
| 148        | PD10062 | PMF         | JAK2              | 20  | 37214676  | A        | C                 | 54             | 0.0                        | 57           | 17.5                     | ADIG     | ENST00000416116 | c.74A>C               | p.S25S               | silent         | M                 |
| 149        | PD10062 | PMF         | JAK2              | 2   | 180810389 | T        | C                 | 277            | 0.0                        | 229          | 17.5                     | CWC22    | CCDS46465.1     | c.2194A>G             | p.K732E              | missense       | M                 |
| 150        | PD10062 | PMF         | JAK2              | 1   | 175372505 | C        | T                 | 43             | 0.0                        | 36           | 13.9                     | TNR      | CCDS1318.1      | c.747G>A              | p.E249E              | silent         | M                 |
| 151        | PD10062 | PMF         | JAK2              | 12  | 54686430  | G        | A                 | 47             | 0.0                        | 54           | 13.0                     | NFE2     | CCDS8876.1      | c.850C>T              | p.R284C              | missense       | M                 |
| 152        | PD10062 | PMF         | JAK2              | 1   | 43650825  | T        | C                 | 142            | 0.7                        | 119          | 8.4                      | WDR65    | CCDS479.1       | c.767T>C              | p.I256T              | missense       | M                 |
| 153        | PD10062 | PMF         | JAK2              | 10  | 124594414 | A        | T                 | 64             | 0.0                        | 102          | 6.9                      | CUZD1    | CCDS7631.1      | c.1190T>A             | p.M397K              | missense       | M                 |
| 154        | PD10063 | PMF         | JAK2              | 6   | 45390488  | -        | delIGCGGC<8>CTGCG | 6              | 0.0                        | 18           | 22.2                     | RUNX2    | CCDS43467.1     | c.421_438del18        | p.A141_A146delIAAAAA | frameshift     | M                 |

| Variant No | PDID    | MPN Subtype | JAK2/MPL mutation | Chr | Position  | Ref base | Mut base           | Germline reads | Germline allele burden (%) | Tumour reads | Tumour allele burden (%) | Gene            | CCDS            | DNA Change       | Protein Change | Type of Change | Validation Method |
|------------|---------|-------------|-------------------|-----|-----------|----------|--------------------|----------------|----------------------------|--------------|--------------------------|-----------------|-----------------|------------------|----------------|----------------|-------------------|
| 155        | PD10063 | PMF         | JAK2              | 16  | 30721267  | _        | delA               | 71             | 0.0                        | 44           | 20.5                     | SRCAP           | CCDS10689.2     | c.952delA        | p.R318fs*62    | frameshift     | M                 |
| 156        | PD10063 | PMF         | JAK2              | 9   | 5073770   | G        | T                  | 133            | 0.0                        | 116          | 17.2                     | JAK2            | CCDS6457.1      | c.1849G>T        | p.V617F        | missense       | T                 |
| 157        | PD10063 | PMF         | JAK2              | 9   | 130911771 | C        | G                  | 27             | 0.0                        | 60           | 16.7                     | LCN2            | CCDS6892.1      | Non-coding       | r.204c>g       | UTR            | M                 |
| 158        | PD10063 | PMF         | JAK2              | 14  | 58718925  | A        | T                  | 87             | 0.0                        | 61           | 16.4                     | PSMA3           | CCDS9731.1      | c.193A>T         | p.K65*         | nonsense       | M                 |
| 159        | PD10063 | PMF         | JAK2              | 13  | 52593243  | G        | A                  | 62             | 0.0                        | 52           | 15.4                     | UTP14C          | CCDS31977.1     | c.239G>A         | p.R80K         | missense       | M                 |
| 160        | PD10063 | PMF         | JAK2              | 12  | 3728528   | C        | T                  | 25             | 0.0                        | 66           | 15.2                     | EFCAB4B         | CCDS44803.1     | c.1943G>A        | p.G648E        | missense       | M                 |
| 161        | PD10063 | PMF         | JAK2              | 9   | 85615130  | C        | T                  | 86             | 1.2                        | 113          | 15.0                     | RASEF           | CCDS6662.1      | c.1677G>A        | p.M559I        | missense       | M                 |
| 162        | PD10063 | PMF         | JAK2              | 9   | 109688207 | G        | A                  | 500            | 0.2                        | 468          | 13.7                     | ZNF462          | CCDS35096.1     | c.2014G>A        | p.V672I        | missense       | M                 |
| 163        | PD10063 | PMF         | JAK2              | 19  | 47856679  | C        | T                  | 40             | 0.0                        | 60           | 13.3                     | DHX34           | CCDS12700.1     | c.392C>T         | p.A131V        | missense       | M                 |
| 164        | PD10063 | PMF         | JAK2              | 5   | 80508237  | G        | A                  | 15             | 0.0                        | 32           | 12.5                     | RASGRF2         | CCDS4052.1      | c.3209G>A        | p.R1070H       | missense       | M                 |
| 165        | PD10063 | PMF         | JAK2              | 9   | 139358931 | C        | T                  | 53             | 0.0                        | 131          | 12.2                     | SEC16A          | ENST00000313050 | c.3853G>A        | p.V1285M       | missense       | M                 |
| 166        | PD10063 | PMF         | JAK2              | 5   | 140249351 | G        | A                  | 58             | 0.0                        | 212          | 11.3                     | PCDHA11         | CCDS47284.1     | c.663G>A         | p.E221E        | silent         | M                 |
| 167        | PD10063 | PMF         | JAK2              | X   | 106793394 | C        | G                  | 98             | 0.0                        | 143          | 10.5                     | FRMPD3          | ENST00000276185 | c.609+8C>G       | p.?            | splice         | M                 |
| 168        | PD10063 | PMF         | JAK2              | 4   | 139980293 | T        | C                  | 146            | 0.0                        | 204          | 10.3                     | ELF2            | CCDS3744.1      | c.1590A>G        | p.K530K        | silent         | M                 |
| 169        | PD10063 | PMF         | JAK2              | 19  | 1399170   | _        | delA               | 18             | 0.0                        | 78           | 10.3                     | GAMT            | CCDS45897.1     | c.416delT        | p.L139fs*22    | frameshift     | M                 |
| 170        | PD10063 | PMF         | JAK2              | X   | 130219590 | C        | T                  | 421            | 0.0                        | 429          | 9.6                      | ARHGAP36        | CCDS14628.1     | c.984C>T         | p.A328A        | silent         | M                 |
| 171        | PD10063 | PMF         | JAK2              | 2   | 20838338  | _        | delCTGT            | 20             | 0.0                        | 53           | 9.4                      | HS1BP3          | CCDS1700.1      | c.478_481delACAG | p.T160fs*26    | frameshift     | M                 |
| 172        | PD10063 | PMF         | JAK2              | 16  | 51174212  | C        | T                  | 28             | 0.0                        | 58           | 8.6                      | SALL1           | CCDS10747.1     | c.1921G>A        | p.V641I        | missense       | M                 |
| 173        | PD10063 | PMF         | JAK2              | X   | 151908806 | G        | A                  | 278            | 0.0                        | 204          | 7.8                      | CSAG1           | CCDS14711.1     | c.45G>A          | p.G15G         | silent         | M                 |
| 174        | PD10063 | PMF         | JAK2              | 2   | 102626297 | C        | G                  | 73             | 0.0                        | 87           | 6.9                      | IL1R2           | CCDS2054.1      | c.332+9C>G       | p.?            | splice         | M                 |
| 175        | PD4060  | PPV-MF      | JAK2              | 9   | 5073770   | G        | T                  | 142            | 0.0                        | 30           | 100.0                    | JAK2            | CCDS6457.1      | c.1849G>T        | p.V617F        | missense       | T C               |
| 176        | PD4060  | PPV-MF      | JAK2              | 8   | 8234772   | C        | T                  | 19             | 0.0                        | 27           | 59.3                     | ENSG00000182319 | CCDS43706.1     | c.1147G>A        | p.V383M        | missense       | T                 |
| 177        | PD4060  | PPV-MF      | JAK2              | 2   | 98828414  | C        | A                  | 96             | 0.0                        | 66           | 50.0                     | VWA3B           | CCDS42718.1     | c.1759C>A        | p.L587M        | missense       | T                 |
| 178        | PD4060  | PPV-MF      | JAK2              | 12  | 111885596 | T        | C                  | 57             | 0.0                        | 101          | 49.5                     | SH2B3           | CCDS9153.1      | c.1373T>C        | p.L458P        | missense       | T                 |
| 179        | PD4060  | PPV-MF      | JAK2              | 1   | 52981650  | A        | T                  | 90             | 0.0                        | 97           | 49.5                     | ZCCHC11         | CCDS30715.1     | c.795T>A         | p.D265E        | missense       | T                 |
| 180        | PD4060  | PPV-MF      | JAK2              | 4   | 106164860 | A        | G                  | 25             | 0.0                        | 64           | 48.4                     | TET2            | CCDS47120.1     | c.3728A>G        | p.K1243R       | missense       | T C               |
| 181        | PD4060  | PPV-MF      | JAK2              | 8   | 133895139 | G        | C                  | 40             | 0.0                        | 87           | 48.3                     | TG              | CCDS34944.1     | c.970G>C         | p.D324H        | missense       | T                 |
| 182        | PD4060  | PPV-MF      | JAK2              | 7   | 5355647   | C        | G                  | 37             | 0.0                        | 25           | 48.0                     | TNRC18          | CCDS47534.1     | c.6802G>C        | p.D2268H       | missense       | T                 |
| 183        | PD4060  | PPV-MF      | JAK2              | 19  | 44536240  | T        | A                  | 213            | 0.0                        | 225          | 46.7                     | ZNF222          | CCDS46098.1     | c.533T>A         | p.L178*        | nonsense       | T                 |
| 184        | PD4060  | PPV-MF      | JAK2              | 5   | 94991892  | G        | A                  | 113            | 0.9                        | 137          | 44.5                     | RFESD           | CCDS47248.1     | c.512G>A         | p.R171K        | missense       | T                 |
| 185        | PD4060  | PPV-MF      | JAK2              | 1   | 120462033 | G        | A                  | 48             | 0.0                        | 108          | 44.4                     | NOTCH2          | CCDS908.1       | c.5683C>T        | p.R1895C       | missense       | T                 |
| 186        | PD4060  | PPV-MF      | JAK2              | 19  | 12246376  | _        | insC               | 143            | 0.0                        | 81           | 38.3                     | ZNF20           | CCDS45986.1     | c.140_141insG    | p.T49fs*8      | frameshift     | T                 |
| 187        | PD4060  | PPV-MF      | JAK2              | 4   | 84352921  | C        | T                  | 76             | 0.0                        | 55           | 27.3                     | HELQ            | CCDS3603.1      | c.2191G>A        | p.V731I        | missense       | T                 |
| 188        | PD4060  | PPV-MF      | JAK2              | 10  | 38740351  | G        | A                  | 16             | 0.0                        | 23           | 17.4                     | ENSG00000215153 | ENST00000399699 | c.394G>A         | p.V132I        | missense       | T                 |
| 189        | PD4060  | PPV-MF      | JAK2              | 9   | 123906255 | C        | T                  | 83             | 0.0                        | 58           | 10.3                     | CEP110          | CCDS35118.1     | c.2946C>T        | p.A982A        | silent         | T                 |
| 190        | PD4060  | PPV-MF      | JAK2              | 3   | 124485118 | C        | T                  | 74             | 0.0                        | 110          | 10.0                     | ITGB5           | CCDS3030.1      | c.2092G>A        | p.E698K        | missense       | T                 |
| 191        | PD4063  | PET-MF      | unmutated         | 5   | 150924251 | C        | T                  | 282            | 0.0                        | 197          | 53.3                     | FAT2            | CCDS4317.1      | c.6437G>A        | p.R2146Q       | missense       | T                 |
| 192        | PD4063  | PET-MF      | unmutated         | 6   | 138638505 | C        | T                  | 206            | 0.0                        | 161          | 47.2                     | KIAA1244        | CCDS5189.2      | c.4463C>T        | p.T1488M       | missense       | T                 |
| 193        | PD4063  | PET-MF      | unmutated         | 19  | 9720950   | G        | A                  | 211            | 0.0                        | 166          | 45.2                     | ZNF561          | CCDS12216.1     | c.1387C>T        | p.R463C        | missense       | T                 |
| 194        | PD4063  | PET-MF      | unmutated         | 2   | 99993053  | G        | A                  | 312            | 0.0                        | 247          | 38.5                     | EIF5B           | CCDS42721.1     | c.1796G>A        | p.R599Q        | missense       | T                 |
| 195        | PD4063  | PET-MF      | unmutated         | 19  | 13054565  | _        | delIGCAGA<42>AGGAG | 7              | 0.0                        | 43           | 37.2                     | CALR            | CCDS12288.1     | c.1092_1143del52 | p.L367fs*46    | frameshift     | M C               |
| 196        | PD4177  | PMF         | JAK2              | 2   | 38298008  | G        | C                  | 27             | 0.0                        | 95           | 50.5                     | CYP1B1          | CCDS1793.1      | c.1489C>G        | p.P497A        | missense       | M                 |
| 197        | PD4177  | PMF         | JAK2              | 17  | 46804413  | G        | A                  | 40             | 2.5                        | 36           | 50.0                     | HOXB13          | CCDS11536.1     | c.602-8C>T       | p.?            | splice         | M                 |
| 198        | PD4177  | PMF         | JAK2              | 4   | 119234411 | G        | A                  | 41             | 2.4                        | 47           | 44.7                     | PRSS12          | CCDS3709.1      | c.1434C>T        | p.R478R        | silent         | T                 |
| 199        | PD4177  | PMF         | JAK2              | 4   | 68606291  | G        | A                  | 500            | 0.2                        | 237          | 43.9                     | GNRHR           | CCDS3517.1      | c.894C>T         | p.N298N        | silent         | M                 |
| 200        | PD4177  | PMF         | JAK2              | 1   | 84663455  | G        | C                  | 224            | 0.9                        | 173          | 43.4                     | PRKACB          | CCDS693.1       | c.731G>C         | p.W244S        | missense       | M                 |
| 201        | PD4177  | PMF         | JAK2              | 16  | 21698920  | A        | G                  | 25             | 0.0                        | 49           | 38.8                     | OTOA            | CCDS10600.2     | c.586A>G         | p.I196V        | missense       | M                 |
| 202        | PD4177  | PMF         | JAK2              | 1   | 146687379 | T        | C                  | 111            | 1.8                        | 88           | 38.6                     | FMO5            | CCDS926.1       | c.269A>G         | p.E90G         | missense       | T                 |
| 203        | PD4177  | PMF         | JAK2              | 2   | 102490556 | G        | A                  | 137            | 0.7                        | 168          | 37.5                     | MAP4K4          | ENST00000324219 | c.2891G>A        | p.C964Y        | missense       | M                 |
| 204        | PD4177  | PMF         | JAK2              | 9   | 5073770   | G        | T                  | 99             | 4.0                        | 106          | 34.9                     | JAK2            | CCDS6457.1      | c.1849G>T        | p.V617F        | missense       | M                 |
| 205        | PD4177  | PMF         | JAK2              | 15  | 55967796  | A        | G                  | 48             | 0.0                        | 75           | 33.3                     | PRTG            | CCDS42040.1     | c.1467T>C        | p.Y489Y        | silent         | T                 |
| 206        | PD4177  | PMF         | JAK2              | 10  | 73990160  | G        | A                  | 34             | 0.0                        | 52           | 28.9                     | C10orf104       | CCDS7314.1      | c.179G>A         | p.S60N         | missense       | M                 |

| Variant No | PDID   | MPN Subtype | JAK2/MPL mutation | Chr | Position  | Ref base | Mut base | Germline reads | Germline allele burden (%) | Tumour reads | Tumour allele burden (%) | Gene     | CCDS            | DNA Change        | Protein Change | Type of Change   | Validation Method |
|------------|--------|-------------|-------------------|-----|-----------|----------|----------|----------------|----------------------------|--------------|--------------------------|----------|-----------------|-------------------|----------------|------------------|-------------------|
| 207        | PD4177 | PMF         | JAK2              | X   | 96203967  | C        | T        | 67             | 0.0                        | 38           | 23.7                     | DIAPH2   | CCDS14467.1     | c.1543C>T         | p.Q515*        | nonsense         | M                 |
| 208        | PD4177 | PMF         | JAK2              | 2   | 189876477 | G        | A        | 55             | 0.0                        | 72           | 23.6                     | COL3A1   | CCDS2297.1      | c.4378G>A         | p.V1460I       | missense         | M                 |
| 209        | PD4177 | PMF         | JAK2              | 3   | 195512081 | C        | A        | 11             | 0.0                        | 500          | 19.8                     | MUC4     | ENST00000475231 | c.6370G>T         | p.G2124W       | missense         | M                 |
| 210        | PD4177 | PMF         | JAK2              | 18  | 47803329  | G        | T        | 25             | 0.0                        | 87           | 19.5                     | MBD1     | CCDS11943.1     | c.265C>A          | p.P89T         | missense         | M                 |
| 211        | PD4177 | PMF         | JAK2              | 13  | 79951583  | C        | T        | 46             | 0.0                        | 58           | 17.2                     | RBM26    | CCDS9462.1      | c.258G>A          | p.E86E         | silent           | M                 |
| 212        | PD4177 | PMF         | JAK2              | 22  | 45281760  | T        | C        | 17             | 0.0                        | 121          | 7.4                      | PHF21B   | CCDS14061.1     | c.1256A>G         | p.Y419C        | missense         | M                 |
| 213        | PD4178 | PPV-MF      | JAK2              | 9   | 5073770   | G        | T        | 122            | 18.9                       | 93           | 98.9                     | JAK2     | CCDS6457.1      | c.1849G>T         | p.V617F        | missense         | M                 |
| 214        | PD4178 | PPV-MF      | JAK2              | 6   | 72806830  | C        | T        | 134            | 6.7                        | 125          | 44.0                     | RIMS1    | CCDS47449.1     | c.424C>T          | p.R142C        | missense         | M                 |
| 215        | PD4178 | PPV-MF      | JAK2              | 15  | 41862902  | G        | A        | 31             | 6.5                        | 53           | 43.4                     | TYRO3    | CCDS10080.1     | c.1579+5G>A       | p.?            | essential splice | M                 |
| 216        | PD4178 | PPV-MF      | JAK2              | 6   | 32803121  | C        | T        | 66             | 4.6                        | 65           | 41.5                     | TAP2     | CCDS4755.1      | c.755G>A          | p.R252Q        | missense         | M                 |
| 217        | PD4178 | PPV-MF      | JAK2              | X   | 55042088  | A        | C        | 86             | 4.7                        | 59           | 39.0                     | ALAS2    | CCDS14366.1     | c.1091T>G         | p.L364R        | missense         | M                 |
| 218        | PD4178 | PPV-MF      | JAK2              | 5   | 112889465 | T        | C        | 42             | 4.8                        | 60           | 38.3                     | YTHDC2   | CCDS4113.1      | c.1966T>C         | p.Y656H        | missense         | M                 |
| 219        | PD4178 | PPV-MF      | JAK2              | 4   | 106158455 | T        | G        | 147            | 5.4                        | 112          | 37.5                     | TET2     | CCDS47120.1     | c.3356T>G         | p.L1119*       | nonsense         | M                 |
| 220        | PD4178 | PPV-MF      | JAK2              | 12  | 96180979  | G        | C        | 40             | 0.0                        | 55           | 12.7                     | NTN4     | CCDS9054.1      | c.323C>G          | p.S108C        | missense         | M                 |
| 221        | PD4178 | PPV-MF      | JAK2              | 7   | 140045012 | G        | A        | 44             | 0.0                        | 34           | 11.8                     | SLC37A3  | CCDS5859.1      | c.1174+4C>T       | p.?            | splice           | M                 |
| 222        | PD4178 | PPV-MF      | JAK2              | 4   | 3133019   | C        | T        | 42             | 0.0                        | 51           | 9.8                      | HTT      | CCDS43206.1     | c.1993C>T         | p.R665C        | missense         | M                 |
| 223        | PD4178 | PPV-MF      | JAK2              | 9   | 16215760  | T        | C        | 125            | 0.0                        | 119          | 7.6                      | C9orf92  | ENST00000380683 | c.190+10A>G       | p.?            | splice           | M                 |
| 224        | PD4178 | PPV-MF      | JAK2              | 17  | 78796006  | C        | G        | 156            | 0.6                        | 254          | 7.5                      | RPTOR    | CCDS11773.1     | c.896C>G          | p.P299R        | missense         | M                 |
| 225        | PD4178 | PPV-MF      | JAK2              | 10  | 24822125  | -        | delGAA   | 71             | 0.0                        | 90           | 5.6                      | KIAA1217 | CCDS31165.1     | c.3373_3375delGAA | p.E1125delE    | inframe          | M                 |
| 226        | PD4772 | PET-PV      | JAK2              | 9   | 5073770   | G        | T        | 191            | 0.5                        | 162          | 46.9                     | JAK2     | CCDS6457.1      | c.1849G>T         | p.V617F        | missense         | T C               |
| 227        | PD4772 | PET-PV      | JAK2              | 22  | 38437084  | G        | T        | 31             | 0.0                        | 500          | 23.6                     | POLR2F   | ENST00000407936 | c.462G>T          | p.R154R        | silent           | T C               |
| 228        | PD4772 | PET-PV      | JAK2              | 2   | 26437358  | C        | T        | 139            | 0.0                        | 149          | 21.5                     | HADHA    | CCDS1721.1      | c.872G>A          | p.R291Q        | missense         | T C               |
| 229        | PD4772 | PET-PV      | JAK2              | 3   | 194062558 | C        | A        | 12             | 0.0                        | 80           | 21.3                     | CPN2     | CCDS33920.1     | c.874G>T          | p.V292F        | missense         | T C               |
| 230        | PD4772 | PET-PV      | JAK2              | 12  | 117914262 | C        | A        | 17             | 0.0                        | 39           | 20.5                     | KSR2     | ENST00000339824 | c.2582+7G>T       | p.?            | splice           | T C               |
| 231        | PD4772 | PET-PV      | JAK2              | 18  | 5290980   | G        | A        | 26             | 0.0                        | 149          | 18.8                     | ZFP161   | CCDS11837.1     | c.1227C>T         | p.N409N        | silent           | T C               |
| 232        | PD4772 | PET-PV      | JAK2              | 12  | 70964834  | C        | T        | 214            | 0.0                        | 274          | 17.2                     | PTPRB    | CCDS44943.1     | c.3342G>A         | p.Q1114Q       | silent           | T                 |
| 233        | PD4772 | PET-PV      | JAK2              | 6   | 70071337  | A        | T        | 209            | 0.0                        | 155          | 16.1                     | BAI3     | CCDS4968.1      | c.4172A>T         | p.E1391V       | missense         | T C               |
| 234        | PD4772 | PET-PV      | JAK2              | 22  | 29120993  | T        | A        | 108            | 0.9                        | 143          | 16.1                     | CHEK2    | CCDS33629.1     | c.693A>T          | p.E231D        | missense         | T C               |
| 235        | PD4772 | PET-PV      | JAK2              | 16  | 30976208  | A        | G        | 36             | 0.0                        | 237          | 14.8                     | SETD1A   | CCDS32435.1     | c.1145A>G         | p.Y382C        | missense         | T C               |
| 236        | PD4772 | PET-PV      | JAK2              | 15  | 65917894  | G        | A        | 24             | 0.0                        | 109          | 14.7                     | SLC24A1  | CCDS45284.1     | c.1476G>A         | p.E492E        | silent           | T C               |
| 237        | PD4772 | PET-PV      | JAK2              | 1   | 33404025  | A        | C        | 132            | 0.0                        | 151          | 13.3                     | RNF19B   | CCDS372.2       | c.1718T>G         | p.I573R        | missense         | T C               |
| 238        | PD4772 | PET-PV      | JAK2              | 10  | 12043738  | T        | C        | 210            | 0.5                        | 92           | 13.0                     | UPF2     | CCDS7086.1      | c.1591A>G         | p.T531A        | missense         | T C               |
| 239        | PD4772 | PET-PV      | JAK2              | 5   | 11364981  | C        | T        | 36             | 0.0                        | 102          | 10.8                     | CTNND2   | CCDS3881.1      | c.1199G>A         | p.S400N        | missense         | T C               |
| 240        | PD4772 | PET-PV      | JAK2              | 10  | 78944618  | G        | C        | 262            | 0.0                        | 197          | 10.7                     | KCNMA1   | CCDS7352.1      | c.659C>G          | p.A220G        | missense         | T C               |
| 241        | PD4772 | PET-PV      | JAK2              | 8   | 67900698  | C        | T        | 46             | 0.0                        | 57           | 10.5                     | LRRC67   | CCDS34902.1     | c.607G>A          | p.G203R        | missense         | T C               |
| 242        | PD4772 | PET-PV      | JAK2              | 21  | 38538413  | T        | C        | 104            | 0.0                        | 170          | 7.1                      | TTC3L    | CCDS13651.1     | c.3897T>C         | p.V1299V       | silent           | T C               |
| 243        | PD4772 | PET-PV      | JAK2              | 17  | 33496956  | G        | T        | 24             | 0.0                        | 93           | 5.4                      | UNC45B   | CCDS11292.1     | c.1547+6G>T       | p.?            | splice           | T C               |
| 244        | PD4773 | PV          | JAK2              | 9   | 5073770   | G        | T        | 136            | 1.5                        | 174          | 51.7                     | JAK2     | CCDS6457.1      | c.1849G>T         | p.V617F        | missense         | T C               |
| 245        | PD4773 | PV          | JAK2              | 5   | 147889325 | G        | T        | 97             | 6.2                        | 73           | 39.7                     | HTR4     | CCDS34272.1     | c.770C>A          | p.A257E        | missense         | T C               |
| 246        | PD4773 | PV          | JAK2              | X   | 18911669  | G        | T        | 221            | 2.7                        | 212          | 39.6                     | PHKA2    | CCDS14190.1     | c.3642C>A         | p.Y1214*       | nonsense         | T C               |
| 247        | PD4773 | PV          | JAK2              | 1   | 203468918 | A        | T        | 95             | 2.1                        | 95           | 37.9                     | OPTC     | CCDS1439.1      | c.671A>T          | p.E224V        | missense         | T                 |
| 248        | PD4773 | PV          | JAK2              | 11  | 61570286  | C        | T        | 65             | 0.0                        | 44           | 34.1                     | FADS1    | CCDS8011.2      | c.1441G>A         | p.A481T        | missense         | T C               |
| 249        | PD4773 | PV          | JAK2              | 14  | 20216077  | T        | A        | 72             | 1.4                        | 58           | 32.8                     | OR4Q3    | CCDS32020.1     | c.491T>A          | p.V164D        | missense         | T C               |
| 250        | PD4773 | PV          | JAK2              | 15  | 86205632  | C        | G        | 163            | 0.6                        | 112          | 28.6                     | AKAP13   | CCDS32320.1     | c.4759C>G         | p.P1587A       | missense         | T                 |
| 251        | PD4773 | PV          | JAK2              | X   | 123554168 | C        | T        | 152            | 2.6                        | 122          | 27.9                     | ODZ1     | CCDS14609.1     | c.4954G>A         | p.V1652I       | missense         | T C               |
| 252        | PD4773 | PV          | JAK2              | 15  | 74964100  | C        | T        | 81             | 2.5                        | 76           | 27.6                     | EDC3     | CCDS10267.1     | c.180G>A          | p.T60T         | silent           | T                 |
| 253        | PD4773 | PV          | JAK2              | 5   | 55178962  | C        | T        | 91             | 0.0                        | 88           | 18.2                     | IL31RA   | CCDS3970.2      | c.545C>T          | p.A182V        | missense         | T C               |
| 254        | PD4773 | PV          | JAK2              | 2   | 10264927  | T        | C        | 105            | 0.0                        | 123          | 16.3                     | RRM2     | CCDS1669.1      | c.519T>C          | p.S173S        | silent           | T                 |
| 255        | PD4773 | PV          | JAK2              | 22  | 46677555  | G        | T        | 94             | 2.1                        | 68           | 13.2                     | TTC38    | CCDS43030.1     | c.675G>T          | p.E225D        | missense         | T C               |
| 256        | PD4773 | PV          | JAK2              | 10  | 67862990  | C        | T        | 50             | 0.0                        | 50           | 10.0                     | CTNNA3   | CCDS7269.1      | c.1902G>A         | p.E634E        | silent           | T                 |
| 257        | PD4773 | PV          | JAK2              | 2   | 198266584 | C        | A        | 177            | 0.0                        | 141          | 5.7                      | SF3B1    | CCDS33356.1     | c.2252G>T         | p.G751V        | missense         | T                 |
| 258        | PD4774 | PV          | JAK2              | 9   | 5073770   | G        | T        | 144            | 3.5                        | 200          | 70.0                     | JAK2     | CCDS6457.1      | c.1849G>T         | p.V617F        | missense         | T                 |

| Variant No | PDID   | MPN Subtype | JAK2/MPL mutation | Chr | Position  | Ref base | Mut base | Germline reads | Germline allele burden (%) | Tumour reads | Tumour allele burden (%) | Gene      | CCDS            | DNA Change  | Protein Change | Type of Change | Validation Method |
|------------|--------|-------------|-------------------|-----|-----------|----------|----------|----------------|----------------------------|--------------|--------------------------|-----------|-----------------|-------------|----------------|----------------|-------------------|
| 259        | PD4774 | PV          | JAK2              | 11  | 55890395  | C        | T        | 430            | 1.9                        | 399          | 35.6                     | OR8H3     | CCDS31519.1     | c.547C>T    | p.P183S        | missense       | T                 |
| 260        | PD4774 | PV          | JAK2              | 6   | 5404914   | T        | A        | 124            | 0.8                        | 76           | 32.9                     | FARS2     | CCDS4494.1      | c.752T>A    | p.M251K        | missense       | T                 |
| 261        | PD4774 | PV          | JAK2              | 1   | 12837518  | C        | T        | 198            | 0.5                        | 266          | 27.4                     | PRAMEF12  | CCDS41254.1     | c.1228C>T   | p.L410L        | silent         | T                 |
| 262        | PD4774 | PV          | JAK2              | 8   | 17823896  | T        | C        | 500            | 0.2                        | 500          | 24.6                     | PCM1      | CCDS47812.1     | c.3135T>C   | p.N1045N       | silent         | T                 |
| 263        | PD4774 | PV          | JAK2              | 20  | 56185321  | G        | A        | 108            | 0.0                        | 213          | 23.0                     | ZBP1      | CCDS13461.1     | c.977C>T    | p.S326L        | missense       | T                 |
| 264        | PD4774 | PV          | JAK2              | 1   | 214818100 | C        | T        | 58             | 3.5                        | 99           | 21.2                     | CENPF     | CCDS31023.1     | c.5187C>T   | p.T1729T       | silent         | T                 |
| 265        | PD4774 | PV          | JAK2              | 7   | 91603160  | T        | A        | 224            | 0.5                        | 144          | 19.4                     | AKAP9     | CCDS5622.1      | c.184T>A    | p.C62S         | missense       | T                 |
| 266        | PD4774 | PV          | JAK2              | 19  | 53989928  | G        | A        | 500            | 0.0                        | 500          | 19.4                     | ZNF813    | CCDS46172.1     | c.58G>A     | p.E20K         | missense       | T                 |
| 267        | PD4774 | PV          | JAK2              | 1   | 205385414 | G        | T        | 178            | 0.6                        | 130          | 16.2                     | LEMD1     | ENST00000367153 | c.216C>A    | p.I72I         | silent         | T                 |
| 268        | PD4774 | PV          | JAK2              | 2   | 220342434 | G        | A        | 15             | 0.0                        | 39           | 15.4                     | SPEG      | CCDS42824.1     | c.4753G>A   | p.G1585R       | missense       | T                 |
| 269        | PD4774 | PV          | JAK2              | 18  | 52896228  | C        | T        | 73             | 0.0                        | 115          | 13.9                     | TCF4      | CCDS42438.1     | c.1729G>A   | p.E577K        | missense       | T                 |
| 270        | PD4774 | PV          | JAK2              | 17  | 63221498  | T        | C        | 47             | 0.0                        | 46           | 13.0                     | RGS9      | CCDS42373.1     | c.1786T>C   | p.F596L        | missense       | T                 |
| 271        | PD4774 | PV          | JAK2              | 11  | 47506081  | A        | G        | 107            | 0.0                        | 129          | 10.9                     | CELF1     | CCDS31482.1     | c.311-6T>C  | p.?            | splice         | T                 |
| 272        | PD4774 | PV          | JAK2              | 3   | 47165976  | A        | T        | 183            | 0.6                        | 188          | 10.6                     | SETD2     | CCDS2749.2      | c.150T>A    | p.A50A         | silent         | T                 |
| 273        | PD4774 | PV          | JAK2              | 19  | 55241196  | G        | A        | 500            | 0.0                        | 216          | 9.3                      | KIR3DL3   | CCDS12903.1     | c.893G>A    | p.R298H        | missense       | T                 |
| 274        | PD4774 | PV          | JAK2              | 2   | 286212    | C        | T        | 155            | 1.3                        | 231          | 9.1                      | FAM150B   | CCDS46218.1     | c.308-9G>A  | p.?            | splice         | T                 |
| 275        | PD4774 | PV          | JAK2              | 18  | 31319793  | G        | A        | 124            | 0.0                        | 240          | 8.8                      | ASXL3     | CCDS45847.1     | c.2425G>A   | p.E809K        | missense       | T                 |
| 276        | PD4774 | PV          | JAK2              | 17  | 20149313  | C        | T        | 78             | 0.0                        | 92           | 8.7                      | CYTSB     | CCDS32590.1     | c.2426C>T   | p.T809I        | missense       | T                 |
| 277        | PD4774 | PV          | JAK2              | 10  | 90512427  | C        | T        | 224            | 0.0                        | 313          | 8.6                      | LIPK      | CCDS44455.1     | c.1114C>T   | p.H372Y        | missense       | T                 |
| 278        | PD4774 | PV          | JAK2              | 11  | 118502727 | G        | A        | 54             | 0.0                        | 71           | 8.5                      | PHLDB1    | CCDS8401.1      | c.2198G>A   | p.R733H        | missense       | T                 |
| 279        | PD4774 | PV          | JAK2              | 12  | 7805341   | G        | T        | 65             | 0.0                        | 94           | 7.5                      | APOBEC1   | CCDS8579.1      | c.135C>A    | p.G45G         | silent         | T                 |
| 280        | PD4774 | PV          | JAK2              | 13  | 36445403  | C        | G        | 169            | 0.0                        | 147          | 6.1                      | DCLK1     | CCDS9354.1      | c.898G>C    | p.G300R        | missense       | T                 |
| 281        | PD4775 | PPV-MF      | JAK2              | 9   | 5073770   | G        | T        | 76             | 25.0                       | 129          | 99.2                     | JAK2      | CCDS6457.1      | c.1849G>T   | p.V617F        | missense       | T                 |
| 282        | PD4775 | PPV-MF      | JAK2              | 4   | 106180838 | -        | delG     | 145            | 3.5                        | 117          | 77.8                     | TET2      | CCDS47120.1     | c.3866delG  | p.C1289fs*74   | frameshift     | M                 |
| 283        | PD4775 | PPV-MF      | JAK2              | 13  | 96242650  | T        | C        | 147            | 3.4                        | 145          | 50.3                     | DZIP1     | CCDS9478.1      | c.1726A>G   | p.S576G        | missense       | M                 |
| 284        | PD4775 | PPV-MF      | JAK2              | 1   | 205589093 | C        | A        | 60             | 6.7                        | 67           | 49.3                     | ELK4      | CCDS1456.1      | c.1080+1G>T | p.?            | missense       | M                 |
| 285        | PD4775 | PPV-MF      | JAK2              | 5   | 174868910 | G        | A        | 34             | 2.9                        | 61           | 47.5                     | DRD1      | CCDS4393.1      | c.1193C>T   | p.S398F        | missense       | M                 |
| 286        | PD4775 | PPV-MF      | JAK2              | 7   | 127014483 | T        | C        | 279            | 3.2                        | 153          | 47.1                     | ZNF800    | CCDS5795.1      | c.907A>G    | p.R303G        | missense       | M                 |
| 287        | PD4775 | PPV-MF      | JAK2              | 2   | 186665453 | G        | C        | 365            | 2.2                        | 281          | 44.1                     | FSIP2     | ENST00000424728 | c.11420G>C  | p.G3807A       | missense       | M                 |
| 288        | PD4775 | PPV-MF      | JAK2              | 13  | 39587196  | G        | A        | 271            | 2.6                        | 133          | 40.6                     | C13orf23  | CCDS9368.2      | c.2193C>T   | p.T731T        | missense       | M                 |
| 289        | PD4775 | PPV-MF      | JAK2              | 20  | 37270390  | G        | A        | 32             | 0.0                        | 73           | 27.4                     | C20orf95  | ENST00000373345 | c.1142G>A   | p.R381H        | missense       | M                 |
| 290        | PD4775 | PPV-MF      | JAK2              | 9   | 105767103 | C        | T        | 249            | 1.2                        | 87           | 25.3                     | CYLC2     | CCDS35085.1     | c.307C>T    | p.R103C        | missense       | M                 |
| 291        | PD4775 | PPV-MF      | JAK2              | 14  | 62204896  | T        | A        | 59             | 0.0                        | 85           | 7.1                      | HIF1A     | CCDS9753.1      | c.1341T>A   | p.N447K        | missense       | M                 |
| 292        | PD4775 | PPV-MF      | JAK2              | 1   | 35907930  | G        | A        | 165            | 1.8                        | 140          | 5.7                      | KIAA0319L | CCDS390.1       | c.2787C>T   | p.S929S        | missense       | M                 |
| 293        | PD4776 | PV          | JAK2              | 9   | 5073770   | G        | T        | 199            | 4.0                        | 193          | 60.1                     | JAK2      | CCDS6457.1      | c.1849G>T   | p.V617F        | missense       | T                 |
| 294        | PD4776 | PV          | JAK2              | 7   | 130365837 | G        | A        | 106            | 0.0                        | 141          | 41.8                     | TSGA13    | CCDS5824.1      | c.121C>T    | p.Q41*         | nonsense       | T                 |
| 295        | PD4776 | PV          | JAK2              | 15  | 49034218  | T        | C        | 268            | 0.4                        | 211          | 40.3                     | CEP152    | CCDS42033.1     | c.3747A>G   | p.Q1249Q       | silent         | T                 |
| 296        | PD4776 | PV          | JAK2              | 12  | 64819669  | T        | C        | 238            | 2.1                        | 358          | 40.2                     | XPOT      | CCDS31852.1     | c.1647T>C   | p.S549S        | silent         | T                 |
| 297        | PD4776 | PV          | JAK2              | 17  | 38635928  | C        | T        | 19             | 0.0                        | 75           | 40.0                     | TNS4      | CCDS11368.1     | c.1908G>A   | p.R636R        | silent         | T                 |
| 298        | PD4777 | PV          | JAK2              | 9   | 5073770   | G        | T        | 164            | 0.0                        | 238          | 40.3                     | JAK2      | CCDS6457.1      | c.1849G>T   | p.V617F        | missense       | T                 |
| 299        | PD4777 | PV          | JAK2              | 12  | 120152131 | G        | C        | 19             | 0.0                        | 69           | 30.4                     | CIT       | CCDS9192.1      | c.4051C>G   | p.R1351G       | missense       | T                 |
| 300        | PD4777 | PV          | JAK2              | 3   | 164750405 | G        | T        | 157            | 0.0                        | 165          | 24.2                     | SI        | CCDS3196.1      | c.2641C>A   | p.L881I        | missense       | T                 |
| 301        | PD4777 | PV          | JAK2              | 13  | 25910402  | T        | A        | 124            | 0.0                        | 219          | 23.3                     | NUPL1     | ENST00000381745 | c.1487T>A   | p.L496H        | missense       | T                 |
| 302        | PD4777 | PV          | JAK2              | 4   | 114824524 | T        | A        | 284            | 0.0                        | 295          | 22.4                     | ARSJ      | CCDS43264.1     | c.706A>T    | p.I236L        | missense       | T                 |
| 303        | PD4777 | PV          | JAK2              | 6   | 24667050  | G        | A        | 30             | 0.0                        | 156          | 20.5                     | TTRAP     | CCDS4557.1      | c.41C>T     | p.A14V         | missense       | T                 |
| 304        | PD4777 | PV          | JAK2              | 2   | 209113112 | C        | T        | 97             | 0.0                        | 90           | 16.7                     | IDH1      | CCDS2381.1      | c.395G>A    | p.R132H        | missense       | T                 |
| 305        | PD4777 | PV          | JAK2              | 5   | 32239127  | G        | A        | 19             | 0.0                        | 85           | 11.8                     | MTMR12    | CCDS34138.1     | c.1324C>T   | p.R442C        | missense       | T                 |
| 306        | PD4777 | PV          | JAK2              | X   | 36329024  | G        | A        | 18             | 0.0                        | 52           | 11.5                     | CxorF30   | ENST00000378653 | c.1457G>A   | p.R486H        | missense       | T                 |
| 307        | PD4777 | PV          | JAK2              | 5   | 110411672 | G        | A        | 28             | 0.0                        | 108          | 9.3                      | TSLP      | CCDS4101.1      | c.380G>A    | p.R127K        | missense       | T                 |
| 308        | PD4777 | PV          | JAK2              | 2   | 179427553 | G        | A        | 57             | 0.0                        | 109          | 8.3                      | TTN       | ENST00000356127 | c.75596C>T  | p.A25199V      | missense       | T                 |
| 309        | PD4777 | PV          | JAK2              | 4   | 88767549  | G        | A        | 164            | 0.0                        | 393          | 4.6                      | MEPE      | CCDS3625.1      | c.1529G>A   | p.S510N        | missense       | T                 |
| 310        | PD4778 | PV          | JAK2              | 9   | 5073770   | G        | T        | 168            | 4.2                        | 139          | 61.9                     | JAK2      | CCDS6457.1      | c.1849G>T   | p.V617F        | missense       | T                 |



| Variant No | PDID   | MPN Subtype | JAK2/MPL mutation | Chr | Position  | Ref base | Mut base | Germline reads | Germline allele burden (%) | Tumour reads | Tumour allele burden (%) | Gene            | CCDS            | DNA Change          | Protein Change | Type of Change | Validation Method |
|------------|--------|-------------|-------------------|-----|-----------|----------|----------|----------------|----------------------------|--------------|--------------------------|-----------------|-----------------|---------------------|----------------|----------------|-------------------|
| 311        | PD4778 | PV          | JAK2              | 8   | 113303924 | A        | G        | 126            | 0.0                        | 159          | 32.1                     | CSMD3           | CCDS6315.1      | c.8789T>C           | p.V2930A       | missense       | T                 |
| 312        | PD4778 | PV          | JAK2              | 17  | 65185786  | C        | A        | 66             | 1.5                        | 112          | 27.7                     | HELZ            | CCDS42374.1     | c.783G>T            | p.K261N        | missense       | T                 |
| 313        | PD4778 | PV          | JAK2              | 1   | 42880441  | C        | T        | 84             | 1.2                        | 87           | 27.6                     | RIMKLA          | CCDS466.2       | c.972C>T            | p.N324N        | silent         | T                 |
| 314        | PD4778 | PV          | JAK2              | 18  | 12814309  | T        | C        | 27             | 0.0                        | 49           | 26.5                     | PTPN2           | CCDS11865.1     | c.751A>G            | p.M251V        | missense       | T                 |
| 315        | PD4778 | PV          | JAK2              | 1   | 214625308 | A        | G        | 48             | 2.1                        | 64           | 25.0                     | PTPN14          | CCDS1514.1      | c.184T>C            | p.F62L         | missense       | T                 |
| 316        | PD4778 | PV          | JAK2              | 7   | 21584775  | T        | A        | 154            | 2.0                        | 223          | 23.3                     | DNAH11          | ENST00000424253 | c.495+8T>A          | p.?            | splice         | T                 |
| 317        | PD4778 | PV          | JAK2              | X   | 23411329  | _        | delA     | 107            | 0.0                        | 238          | 23.1                     | PTCHD1          | CCDS35215.2     | c.1694delA          | p.E565fs*12    | frameshift     | T                 |
| 318        | PD4778 | PV          | JAK2              | 17  | 27005085  | C        | A        | 65             | 6.2                        | 139          | 23.0                     | SUPT6H          | CCDS32596.1     | c.1000-9C>A         | p.?            | splice         | T                 |
| 319        | PD4778 | PV          | JAK2              | 2   | 234072457 | A        | G        | 174            | 0.0                        | 192          | 16.7                     | INPP5D          | ENST00000359570 | c.1345A>G           | p.I449V        | missense       | T                 |
| 320        | PD4778 | PV          | JAK2              | 4   | 36118699  | C        | A        | 45             | 0.0                        | 48           | 10.4                     | ARAP2           | CCDS3441.1      | c.4022G>T           | p.C1341F       | missense       | T                 |
| 321        | PD4780 | PMF         | JAK2              | 9   | 5073770   | G        | T        | 380            | 20.5                       | 159          | 64.8                     | JAK2            | CCDS6457.1      | c.1849G>T           | p.V617F        | missense       | T C               |
| 322        | PD4780 | PMF         | JAK2              | 2   | 25457242  | C        | T        | 19             | 10.5                       | 61           | 45.9                     | DNMT3A          | CCDS33157.1     | c.2645G>A           | p.R882H        | missense       | T C               |
| 323        | PD4780 | PMF         | JAK2              | 11  | 94730931  | A        | T        | 250            | 3.2                        | 190          | 11.6                     | KDM4D           | CCDS8302.1      | c.395A>T            | p.N132I        | missense       | T C               |
| 324        | PD4780 | PMF         | JAK2              | 19  | 47935366  | G        | C        | 148            | 2.0                        | 142          | 5.6                      | SLC8A2          | ENST00000391903 | c.1931C>G           | p.T644R        | missense       | T C               |
| 325        | PD4780 | PMF         | JAK2              | 16  | 71113806  | A        | T        | 163            | 1.2                        | 160          | 5.0                      | HYDIN2          | CCDS42189.1     | c.1720T>A           | p.F574I        | missense       | T C               |
| 326        | PD4781 | PV          | JAK2              | 9   | 5073770   | G        | T        | 176            | 0.0                        | 185          | 91.9                     | JAK2            | CCDS6457.1      | c.1849G>T           | p.V617F        | missense       | T                 |
| 327        | PD4781 | PV          | JAK2              | 2   | 160086905 | C        | G        | 23             | 0.0                        | 72           | 51.4                     | TANC1           | CCDS42766.1     | c.4968C>G           | p.H1656Q       | missense       | T                 |
| 328        | PD4781 | PV          | JAK2              | 4   | 106196561 | C        | T        | 421            | 0.0                        | 174          | 47.1                     | TET2            | CCDS47120.1     | c.4894C>T           | p.Q1632*       | nonsense       | T                 |
| 329        | PD4781 | PV          | JAK2              | 1   | 237632393 | G        | A        | 218            | 0.0                        | 303          | 45.2                     | RYR2            | ENST00000366574 | c.1608G>A           | p.A536A        | silent         | T                 |
| 330        | PD4781 | PV          | JAK2              | 6   | 128150732 | C        | T        | 224            | 0.0                        | 229          | 44.5                     | THEMIS          | CCDS34534.1     | c.598G>A            | p.V200I        | missense       | T                 |
| 331        | PD4781 | PV          | JAK2              | 11  | 47498982  | A        | G        | 32             | 0.0                        | 80           | 43.8                     | CELF1           | CCDS31482.1     | c.764-5T>C          | p.?            | splice         | T                 |
| 332        | PD4781 | PV          | JAK2              | 3   | 153840279 | T        | G        | 18             | 0.0                        | 32           | 43.8                     | ENSG00000114790 | CCDS46938.1     | c.498T>G            | p.T166T        | silent         | T                 |
| 333        | PD4781 | PV          | JAK2              | 13  | 27847423  | T        | C        | 28             | 0.0                        | 56           | 41.1                     | RASL11A         | CCDS9321.1      | c.521T>C            | p.L174P        | missense       | T                 |
| 334        | PD4781 | PV          | JAK2              | 6   | 80718118  | T        | A        | 136            | 0.0                        | 108          | 39.8                     | TRK             | CCDS4993.1      | c.378T>A            | p.D126E        | missense       | T                 |
| 335        | PD4781 | PV          | JAK2              | 4   | 48592819  | A        | G        | 500            | 0.0                        | 219          | 37.9                     | FRYL            | CCDS43227.1     | c.1364T>C           | p.L455P        | missense       | T                 |
| 336        | PD4781 | PV          | JAK2              | 3   | 42956783  | C        | A        | 90             | 2.2                        | 124          | 37.9                     | ZNF662          | CCDS46807.1     | c.1296C>A           | p.H432Q        | missense       | T                 |
| 337        | PD4781 | PV          | JAK2              | 11  | 47331140  | A        | G        | 96             | 0.0                        | 136          | 37.5                     | MADD            | CCDS7930.1      | c.4135A>G           | p.I1379V       | missense       | T                 |
| 338        | PD4781 | PV          | JAK2              | 15  | 29346853  | C        | T        | 52             | 0.0                        | 48           | 37.5                     | APBA2           | CCDS10022.1     | c.766C>T            | p.P256S        | missense       | T                 |
| 339        | PD4781 | PV          | JAK2              | 10  | 112541459 | C        | T        | 12             | 0.0                        | 108          | 37.0                     | RBM20           | CCDS44477.1     | c.1092C>T           | p.F364F        | silent         | T                 |
| 340        | PD4781 | PV          | JAK2              | 10  | 133748027 | G        | A        | 198            | 1.0                        | 500          | 36.8                     | PPP2R2D         | ENST00000455566 | c.73G>A             | p.G25S         | missense       | T                 |
| 341        | PD4781 | PV          | JAK2              | 10  | 37488720  | C        | T        | 211            | 0.0                        | 83           | 25.3                     | ANKRD30A        | CCDS7193.1      | c.2610+4C>T         | p.?            | splice         | T                 |
| 342        | PD4781 | PV          | JAK2              | 8   | 146107097 | _        | delCAAT  | 12             | 0.0                        | 42           | 14.3                     | ZNF250          | CCDS34972.1     | c.1483_1486delATTG  | p.I495fs*3     | frameshift     | T                 |
| 343        | PD4781 | PV          | JAK2              | 7   | 540862    | G        | A        | 19             | 0.0                        | 275          | 6.9                      | PDGFA           | CCDS34578.1     | c.471C>T            | p.Y157Y        | silent         | T                 |
| 344        | PD4781 | PV          | JAK2              | 17  | 58740749  | C        | T        | 72             | 0.0                        | 163          | 5.5                      | PPM1D           | CCDS11625.1     | c.1654C>T           | p.R552*        | nonsense       | T                 |
| 345        | PD4781 | PV          | JAK2              | 8   | 30916726  | T        | A        | 500            | 0.0                        | 343          | 3.5                      | WRN             | CCDS6082.1      | c.154T>A            | p.S52T         | missense       | T                 |
| 346        | PD4940 | PV          | JAK2              | 7   | 129666132 | G        | A        | 84             | 1.2                        | 167          | 31.7                     | ZC3HC1          | CCDS34753.1     | c.642C>T            | p.I214I        | silent         | M                 |
| 347        | PD4940 | PV          | JAK2              | 14  | 64532156  | G        | T        | 188            | 7.5                        | 119          | 28.6                     | SYNE2           | CCDS9761.2      | c.10219G>T          | p.V3407L       | missense       | M                 |
| 348        | PD4940 | PV          | JAK2              | 9   | 5073770   | G        | T        | 442            | 6.8                        | 245          | 26.5                     | JAK2            | CCDS6457.1      | c.1849G>T           | p.V617F        | missense       | M                 |
| 349        | PD4940 | PV          | JAK2              | 2   | 27015025  | C        | T        | 107            | 3.7                        | 99           | 25.3                     | CENPA           | CCDS1729.1      | c.127C>T            | p.R43W         | missense       | M                 |
| 350        | PD4941 | PV          | JAK2              | 9   | 5073770   | G        | T        | 157            | 1.2                        | 153          | 13.7                     | JAK2            | CCDS6457.1      | c.1849G>T           | p.V617F        | missense       | T                 |
| 351        | PD4941 | PV          | JAK2              | 1   | 109742543 | _        | insGCCAA | 44             | 0.0                        | 44           | 6.8                      | KIAA1324        | CCDS794.1       | c.2569_2570insGCCAA | p.P857fs*8     | frameshift     | T                 |
| 352        | PD4941 | PV          | JAK2              | 3   | 14974221  | T        | A        | 207            | 0.0                        | 268          | 6.0                      | FGD5            | CCDS46767.1     | c.4335T>A           | p.D1445E       | missense       | T                 |
| 353        | PD4941 | PV          | JAK2              | 10  | 20568746  | T        | A        | 121            | 0.0                        | 149          | 4.7                      | PLXDC2          | CCDS7132.1      | c.1588T>A           | p.*530K        | nonstop        | T                 |
| 354        | PD4944 | PV          | JAK2              | 7   | 72892410  | G        | A        | 125            | 0.8                        | 160          | 31.9                     | BAZ1B           | CCDS5549.1      | c.1381C>T           | p.P461S        | missense       | T                 |
| 355        | PD4944 | PV          | JAK2              | 9   | 5073770   | G        | T        | 126            | 0.8                        | 270          | 28.9                     | JAK2            | CCDS6457.1      | c.1849G>T           | p.V617F        | missense       | T                 |
| 356        | PD4944 | PV          | JAK2              | 12  | 95914938  | C        | T        | 65             | 0.0                        | 174          | 27.6                     | USP44           | CCDS9053.1      | c.1774G>A           | p.V592I        | missense       | T                 |
| 357        | PD4944 | PV          | JAK2              | 10  | 55582162  | G        | A        | 46             | 0.0                        | 91           | 27.5                     | PCDH15          | CCDS44404.1     | c.5330C>T           | p.S1777F       | missense       | T                 |
| 358        | PD4944 | PV          | JAK2              | 9   | 84606792  | _        | delT     | 266            | 0.4                        | 448          | 24.3                     | ENSG00000214929 | ENSG00000214929 | c.1407delT          | p.W471fs*7     | frameshift     | T                 |
| 359        | PD4944 | PV          | JAK2              | 8   | 134144057 | C        | T        | 60             | 0.0                        | 91           | 14.3                     | TG              | CCDS34944.1     | c.7864C>T           | p.L2622L       | silent         | T                 |
| 360        | PD4947 | PPV-MF      | JAK2              | 9   | 5073770   | G        | T        | 178            | 0.0                        | 156          | 76.9                     | JAK2            | CCDS6457.1      | c.1849G>T           | p.V617F        | missense       | T                 |
| 361        | PD4947 | PPV-MF      | JAK2              | X   | 18276358  | T        | C        | 44             | 0.0                        | 42           | 64.3                     | SCML2           | CCDS14185.1     | c.1079A>G           | p.Y360C        | missense       | M                 |
| 362        | PD4947 | PPV-MF      | JAK2              | X   | 34150174  | G        | A        | 73             | 0.0                        | 48           | 56.3                     | FAM47A          | CCDS43926.1     | c.222C>T            | p.D74D         | silent         | M                 |

| Variant No | PDID   | MPN Subtype | JAK2/MPL mutation | Chr | Position  | Ref base | Mut base | Germline reads | Germline allele burden (%) | Tumour reads | Tumour allele burden (%) | Gene            | CCDS            | DNA Change        | Protein Change | Type of Change | Validation Method |
|------------|--------|-------------|-------------------|-----|-----------|----------|----------|----------------|----------------------------|--------------|--------------------------|-----------------|-----------------|-------------------|----------------|----------------|-------------------|
| 363        | PD4947 | PPV-MF      | JAK2              | 9   | 139277995 | -        | delGCT   | 1              | 0.0                        | 10           | 50.0                     | SNAPC4          | CCDS6998.1      | c.1624_1626delAGC | p.S542delS     | inframe        | M                 |
| 364        | PD4947 | PPV-MF      | JAK2              | 2   | 20201812  | C        | T        | 77             | 0.0                        | 124          | 34.7                     | MATN3           | CCDS46226.1     | c.946G>A          | p.G316R        | missense       | M                 |
| 365        | PD4947 | PPV-MF      | JAK2              | 4   | 104080185 | C        | T        | 93             | 0.0                        | 90           | 34.4                     | CENPE           | CCDS34042.1     | c.2583G>A         | p.L861L        | silent         | M                 |
| 366        | PD4947 | PPV-MF      | JAK2              | 12  | 121618196 | A        | G        | 75             | 0.0                        | 60           | 31.7                     | P2RX7           | CCDS9213.1      | c.1228A>G         | p.R410G        | missense       | M                 |
| 367        | PD4947 | PPV-MF      | JAK2              | 5   | 7897263   | G        | A        | 61             | 0.0                        | 94           | 30.9                     | MTRR            | CCDS3874.1      | c.1936G>A         | p.E646K        | missense       | M                 |
| 368        | PD4947 | PPV-MF      | JAK2              | 12  | 112673344 | G        | A        | 49             | 0.0                        | 102          | 30.4                     | C12orf51        | CCDS44978.1     | c.4423C>T         | p.L1475L       | silent         | M                 |
| 369        | PD4947 | PPV-MF      | JAK2              | 1   | 62380259  | G        | T        | 192            | 0.0                        | 189          | 30.2                     | INADL           | CCDS617.2       | c.3493G>T         | p.V1165F       | missense       | M                 |
| 370        | PD4947 | PPV-MF      | JAK2              | 17  | 49281241  | C        | T        | 148            | 0.0                        | 245          | 27.8                     | MBTD1           | CCDS11581.2     | c.650G>A          | p.G217D        | missense       | M                 |
| 371        | PD4947 | PPV-MF      | JAK2              | 1   | 111893999 | A        | G        | 47             | 2.1                        | 36           | 25.0                     | C1orf88         | CCDS833.1       | Non-coding        | r.991a>g       | UTR            | M                 |
| 372        | PD4947 | PPV-MF      | JAK2              | 20  | 31022287  | -        | insA     | 51             | 0.0                        | 104          | 22.1                     | ASXL1           | CCDS13201.1     | c.1772_1773insA   | p.Y591fs*1     | frameshift     | M                 |
| 373        | PD4947 | PPV-MF      | JAK2              | 2   | 24484025  | C        | G        | 73             | 0.0                        | 64           | 21.9                     | ITSN2           | CCDS1710.2      | c.2632G>C         | p.A878P        | missense       | M                 |
| 374        | PD4947 | PPV-MF      | JAK2              | 3   | 186760924 | C        | T        | 36             | 0.0                        | 67           | 19.4                     | ST6GAL1         | CCDS3285.1      | c.433C>T          | p.R145W        | missense       | M                 |
| 375        | PD4947 | PPV-MF      | JAK2              | 7   | 757535    | C        | T        | 29             | 0.0                        | 99           | 19.2                     | HEATR2          | CCDS34580.1     | c.1328C>T         | p.T443M        | missense       | M                 |
| 376        | PD4947 | PPV-MF      | JAK2              | 1   | 181549728 | C        | A        | 229            | 0.0                        | 208          | 16.4                     | CACNA1E         | ENST00000367573 | c.770-3C>A        | p.?            | splice         | M                 |
| 377        | PD4947 | PPV-MF      | JAK2              | 19  | 33608878  | G        | T        | 39             | 0.0                        | 50           | 14.0                     | GPATCH1         | CCDS12428.1     | c.2344G>T         | p.G782C        | missense       | M                 |
| 378        | PD4947 | PPV-MF      | JAK2              | 17  | 757535    | C        | A        | 67             | 0.0                        | 31           | 12.9                     | TP53            | CCDS11118.1     | c.746G>T          | p.R249M        | missense       | M                 |
| 379        | PD4947 | PPV-MF      | JAK2              | X   | 13626530  | A        | G        | 81             | 0.0                        | 58           | 12.1                     | EGFL6           | CCDS14155.1     | c.743A>G          | p.K248R        | missense       | M                 |
| 380        | PD4947 | PPV-MF      | JAK2              | 20  | 31022656  | -        | delC     | 23             | 0.0                        | 38           | 10.5                     | ASXL1           | CCDS13201.1     | c.2141delC        | p.R715fs*10    | frameshift     | M                 |
| 381        | PD4947 | PPV-MF      | JAK2              | 11  | 114400913 | T        | C        | 141            | 0.0                        | 97           | 10.3                     | FAM55A          | CCDS8372.1      | c.391A>G          | p.N131D        | missense       | M                 |
| 382        | PD4947 | PPV-MF      | JAK2              | 11  | 33108653  | G        | A        | 226            | 0.0                        | 318          | 9.4                      | CSTF3           | CCDS7883.1      | c.1676C>T         | p.P559L        | missense       | M                 |
| 383        | PD4947 | PPV-MF      | JAK2              | 4   | 106158248 | C        | A        | 92             | 0.0                        | 77           | 9.1                      | TET2            | CCDS47120.1     | c.3149C>A         | p.S1050*       | nonsense       | M                 |
| 384        | PD4947 | PPV-MF      | JAK2              | 5   | 33643529  | G        | A        | 164            | 0.0                        | 108          | 8.3                      | ADAMTS12        | ENST00000504830 | c.1526C>T         | p.S509F        | missense       | M                 |
| 385        | PD4947 | PPV-MF      | JAK2              | 4   | 70361595  | T        | A        | 307            | 0.0                        | 240          | 8.3                      | UGT2B4          | CCDS43234.1     | Non-coding        | r.32a>u        | UTR            | M                 |
| 386        | PD4947 | PPV-MF      | JAK2              | 18  | 55287857  | C        | T        | 59             | 0.0                        | 94           | 7.5                      | NARS            | CCDS32837.1     | c.37G>A           | p.G13R         | missense       | M                 |
| 387        | PD4947 | PPV-MF      | JAK2              | 12  | 81528768  | C        | A        | 78             | 0.0                        | 69           | 7.3                      | ACSS3           | CCDS9022.1      | c.630C>A          | p.R210R        | silent         | M                 |
| 388        | PD4990 | PMF         | JAK2              | 9   | 133779655 | G        | A        | 51             | 0.0                        | 72           | 31.9                     | FIBCD1          | CCDS6937.1      | c.1182C>T         | p.S394S        | silent         | T                 |
| 389        | PD4990 | PMF         | JAK2              | 3   | 48664359  | G        | C        | 55             | 0.0                        | 55           | 30.9                     | SLC26A6         | CCDS43087.1     | c.2023C>G         | p.L675V        | missense       | T C               |
| 390        | PD4990 | PMF         | JAK2              | 19  | 56720317  | G        | T        | 102            | 0.0                        | 72           | 29.2                     | ZSCAN5C         | ENST00000376267 | c.1239G>T         | p.T413T        | silent         | T                 |
| 391        | PD4990 | PMF         | JAK2              | 9   | 35957932  | C        | T        | 56             | 0.0                        | 44           | 25.0                     | OR2S2           | CCDS6596.2      | c.164G>A          | p.R55H         | missense       | T                 |
| 392        | PD4990 | PMF         | JAK2              | 10  | 50531367  | G        | A        | 97             | 0.0                        | 94           | 20.2                     | C10orf71        | CCDS44387.1     | c.777G>A          | p.T259T        | silent         | T                 |
| 393        | PD4990 | PMF         | JAK2              | 11  | 118184577 | G        | A        | 28             | 0.0                        | 30           | 20.0                     | CD3E            | CCDS31685.1     | c.508G>A          | p.G170S        | missense       | T                 |
| 394        | PD4990 | PMF         | JAK2              | 2   | 15493788  | T        | A        | 228            | 0.0                        | 209          | 18.2                     | NBAS            | CCDS1685.1      | c.3978A>T         | p.E1326D       | missense       | T                 |
| 395        | PD4990 | PMF         | JAK2              | 1   | 74797193  | C        | T        | 40             | 0.0                        | 33           | 18.2                     | TNNI3K          | CCDS44161.1     | c.807C>T          | p.F269F        | silent         | T C               |
| 396        | PD4990 | PMF         | JAK2              | 16  | 53706849  | C        | T        | 69             | 0.0                        | 62           | 17.7                     | RPGRIP1L        | CCDS32447.1     | c.962G>A          | p.R321H        | missense       | T                 |
| 397        | PD4990 | PMF         | JAK2              | 2   | 21363871  | C        | T        | 161            | 0.6                        | 130          | 16.9                     | ENSG00000218819 | ENST00000405799 | c.3532C>T         | p.R1178C       | missense       | T                 |
| 398        | PD4990 | PMF         | JAK2              | 10  | 87362144  | G        | A        | 31             | 0.0                        | 25           | 16.0                     | GRID1           | CCDS31236.1     | c.2916C>T         | p.N972M        | silent         | T C               |
| 399        | PD4990 | PMF         | JAK2              | X   | 71804146  | C        | T        | 74             | 0.0                        | 71           | 15.5                     | PHKA1           | CCDS14421.1     | c.3250G>A         | p.G1084R       | missense       | T                 |
| 400        | PD4990 | PMF         | JAK2              | 14  | 24528165  | T        | C        | 26             | 0.0                        | 40           | 15.0                     | LRRC16B         | CCDS32054.1     | c.1541T>C         | p.F514S        | missense       | T                 |
| 401        | PD4990 | PMF         | JAK2              | 8   | 2855593   | C        | T        | 201            | 0.5                        | 181          | 14.9                     | CSMD1           | ENST00000318252 | c.7504G>A         | p.V2502M       | missense       | T                 |
| 402        | PD4990 | PMF         | JAK2              | 3   | 38591839  | C        | T        | 71             | 0.0                        | 68           | 14.7                     | SCN5A           | CCDS46796.1     | c.6024G>A         | p.P2008P       | silent         | T                 |
| 403        | PD4990 | PMF         | JAK2              | 9   | 5073770   | G        | T        | 159            | 0.0                        | 112          | 14.3                     | JAK2            | CCDS6457.1      | c.1849G>T         | p.V617F        | missense       | T C               |
| 404        | PD4990 | PMF         | JAK2              | 4   | 88295868  | C        | T        | 153            | 0.0                        | 140          | 14.3                     | HSD17B11        | CCDS3619.1      | c.433G>A          | p.V145I        | missense       | T C               |
| 405        | PD4990 | PMF         | JAK2              | 2   | 25463184  | G        | A        | 73             | 2.7                        | 92           | 14.1                     | DNMT3A          | CCDS33157.1     | c.2309C>T         | p.S770L        | missense       | T C               |
| 406        | PD4990 | PMF         | JAK2              | 2   | 25457242  | C        | T        | 22             | 0.0                        | 48           | 6.3                      | DNMT3A          | CCDS33157.1     | c.2645G>A         | p.R882H        | missense       | T C               |
| 407        | PD4994 | PMF         | MPL               | X   | 30269088  | G        | A        | 11             | 0.0                        | 10           | 100.0                    | MAGEB1          | CCDS14222.1     | c.478G>A          | p.V160I        | missense       | T                 |
| 408        | PD4994 | PMF         | MPL               | 5   | 163395    | C        | T        | 24             | 0.0                        | 61           | 59.0                     | PLEKHG4B        | CCDS34124.1     | c.2140C>T         | p.R714C        | missense       | T                 |
| 409        | PD4994 | PMF         | MPL               | 5   | 163382    | G        | T        | 19             | 0.0                        | 48           | 56.3                     | PLEKHG4B        | CCDS34124.1     | c.2127G>T         | p.Q709H        | missense       | T                 |
| 410        | PD4994 | PMF         | MPL               | 1   | 43815009  | G        | T        | 40             | 2.5                        | 54           | 55.6                     | MPL             | CCDS483.1       | c.1544G>T         | p.W515L        | missense       | T                 |
| 411        | PD4994 | PMF         | MPL               | 12  | 117968764 | G        | A        | 126            | 1.6                        | 149          | 53.0                     | KSR2            | ENST00000339824 | c.1784C>T         | p.P595L        | missense       | T                 |
| 412        | PD4994 | PMF         | MPL               | 17  | 45364547  | G        | A        | 53             | 0.0                        | 56           | 50.0                     | ITGB3           | CCDS11511.1     | c.889G>A          | p.G297R        | missense       | T                 |
| 413        | PD4994 | PMF         | MPL               | 9   | 35092523  | C        | G        | 110            | 0.9                        | 94           | 48.9                     | PIGO            | CCDS6575.1      | c.1361G>C         | p.G454A        | missense       | T                 |
| 414        | PD4994 | PMF         | MPL               | 1   | 84663454  | T        | G        | 147            | 2.7                        | 134          | 47.8                     | PRKACB          | CCDS693.1       | c.730T>G          | p.W244G        | missense       | T                 |

| Variant No | PDID   | MPN Subtype | JAK2/MPL mutation | Chr | Position  | Ref base | Mut base          | Germline reads | Germline allele burden (%) | Tumour reads | Tumour allele burden (%) | Gene            | CCDS            | DNA Change        | Protein Change | Type of Change | Validation Method |
|------------|--------|-------------|-------------------|-----|-----------|----------|-------------------|----------------|----------------------------|--------------|--------------------------|-----------------|-----------------|-------------------|----------------|----------------|-------------------|
| 415        | PD4994 | PMF         | MPL               | 12  | 13716667  | C        | G                 | 25             | 0.0                        | 44           | 45.5                     | GRIN2B          | CCDS8662.1      | c.3505G>C         | p.G1169R       | missense       | T                 |
| 416        | PD4994 | PMF         | MPL               | 20  | 2969091   | G        | A                 | 108            | 1.9                        | 82           | 45.1                     | PTPRA           | CCDS13038.1     | c.709G>A          | p.D237N        | missense       | T                 |
| 417        | PD4994 | PMF         | MPL               | 12  | 53681865  | G        | T                 | 14             | 0.0                        | 28           | 42.9                     | ESPL1           | CCDS8852.1      | c.4286G>T         | p.R1429M       | missense       | T                 |
| 418        | PD4994 | PMF         | MPL               | 15  | 57565358  | C        | T                 | 68             | 1.5                        | 74           | 41.9                     | TCF12           | CCDS10160.1     | c.1876C>T         | p.R626*        | nonsense       | T                 |
| 419        | PD4994 | PMF         | MPL               | 3   | 73438996  | G        | A                 | 40             | 0.0                        | 46           | 41.3                     | PDZRN3          | CCDS33789.1     | c.1387C>T         | p.R463C        | missense       | T                 |
| 420        | PD4994 | PMF         | MPL               | 15  | 99670821  | C        | A                 | 29             | 0.0                        | 53           | 37.7                     | SYNM            | ENST00000336292 | c.2253C>A         | p.P751P        | silent         | T                 |
| 421        | PD4994 | PMF         | MPL               | 4   | 106180824 | _        | delCTT            | 104            | 0.0                        | 77           | 29.9                     | TET2            | CCDS47120.1     | c.3852_3854delCTT | p.F1285delF    | inframe        | T                 |
| 422        | PD4994 | PMF         | MPL               | 18  | 8806981   | C        | T                 | 11             | 0.0                        | 17           | 29.4                     | KIAA0802        | CCDS11841.1     | c.2527C>T         | p.R843W        | missense       | T                 |
| 423        | PD4994 | PMF         | MPL               | 16  | 75513433  | G        | A                 | 24             | 0.0                        | 28           | 28.6                     | CHST6           | CCDS10918.1     | c.294C>T          | p.S98S         | silent         | T                 |
| 424        | PD4994 | PMF         | MPL               | 4   | 76715234  | T        | C                 | 17             | 0.0                        | 34           | 11.8                     | RGPD2           | CCDS42710.1     | Non-coding        | r.S3a>g        | UTR            | T                 |
| 425        | PD4996 | PET-MF      | unmutated         | 9   | 91617201  | C        | T                 | 30             | 0.0                        | 44           | 56.8                     | S1PR3           | CCDS6680.1      | c.1086C>T         | p.S362S        | silent         | T                 |
| 426        | PD4996 | PET-MF      | unmutated         | 3   | 47278102  | G        | A                 | 20             | 0.0                        | 30           | 53.3                     | KIF9            | CCDS2752.1      | c.1932C>T         | p.Y644Y        | silent         | T                 |
| 427        | PD4996 | PET-MF      | unmutated         | 4   | 76714946  | G        | T                 | 118            | 0.0                        | 104          | 49.0                     | USO1            | ENST00000264904 | c.1128G>T         | p.L376F        | missense       | T                 |
| 428        | PD4996 | PET-MF      | unmutated         | 1   | 27480515  | T        | C                 | 42             | 0.0                        | 59           | 44.1                     | SLC9A1          | CCDS295.1       | c.311A>G          | p.E104G        | missense       | T                 |
| 429        | PD4996 | PET-MF      | unmutated         | 3   | 54913060  | G        | A                 | 328            | 0.3                        | 231          | 43.7                     | CACNA2D3        | ENST00000474759 | c.1726G>A         | p.V576M        | missense       | T                 |
| 430        | PD4996 | PET-MF      | unmutated         | 3   | 121575935 | A        | G                 | 69             | 0.0                        | 55           | 43.6                     | EAF2            | CCDS3006.1      | c.416A>G          | p.N139S        | missense       | T                 |
| 431        | PD4996 | PET-MF      | unmutated         | 4   | 123663666 | G        | A                 | 83             | 0.0                        | 76           | 39.5                     | BBS12           | CCDS3728.1      | c.619G>A          | p.E207K        | missense       | T                 |
| 432        | PD4996 | PET-MF      | unmutated         | 21  | 45504088  | T        | C                 | 12             | 0.0                        | 18           | 38.9                     | TRAPPC10        | CCDS13704.1     | c.2324T>C         | p.I775T        | missense       | T                 |
| 433        | PD4996 | PET-MF      | unmutated         | 8   | 139732990 | C        | T                 | 311            | 0.0                        | 289          | 38.8                     | COL22A1         | CCDS6376.1      | c.2347G>A         | p.G783S        | missense       | T                 |
| 434        | PD4996 | PET-MF      | unmutated         | 5   | 140482394 | T        | G                 | 72             | 0.0                        | 70           | 38.6                     | PCDHB3          | CCDS4245.1      | c.2161T>G         | p.S721A        | missense       | T                 |
| 435        | PD4996 | PET-MF      | unmutated         | 20  | 40730778  | C        | A                 | 50             | 0.0                        | 52           | 19.2                     | PTPRT           | CCDS42874.1     | c.3700G>T         | p.A1234S       | missense       | T                 |
| 436        | PD4996 | PET-MF      | unmutated         | 1   | 152383006 | _        | delIT             | 216            | 0.0                        | 141          | 5.7                      | CRNN            | CCDS1010.1      | c.552delA         | p.Q184fs*23    | frameshift     | T                 |
| 437        | PD4996 | PET-MF      | unmutated         | 19  | 13054565  | _        | delGCAGA<42>AGGAG | 21             | 4.8                        | 8            | 25.0                     | CALR            | CCDS12288.1     | c.1092_1143del52  | p.L367fs*46    | frameshift     | M T C             |
| 438        | PD5003 | ET          | unmutated         | 10  | 44104735  | C        | A                 | 34             | 0.0                        | 31           | 16.1                     | ZNF485          | CCDS7205.2      | c.184C>A          | p.Q62K         | missense       | M                 |
| 439        | PD5003 | ET          | unmutated         | 8   | 134050936 | C        | A                 | 21             | 0.0                        | 31           | 16.1                     | SLA             | CCDS47923.1     | c.784G>T          | p.E262*        | nonsense       | M                 |
| 440        | PD5003 | ET          | unmutated         | 19  | 12297505  | C        | A                 | 45             | 0.0                        | 33           | 15.2                     | ZNF136          | CCDS32916.1     | c.312C>A          | p.S104R        | missense       | M                 |
| 441        | PD5003 | ET          | unmutated         | 1   | 67519621  | C        | A                 | 44             | 0.0                        | 43           | 14.0                     | SLC35D1         | CCDS6636.1      | c.76G>T           | p.E26*         | nonsense       | M                 |
| 442        | PD5003 | ET          | unmutated         | 12  | 57843673  | C        | A                 | 83             | 0.0                        | 36           | 13.9                     | INHCB           | CCDS8938.1      | c.927C>A          | p.G309G        | silent         | M                 |
| 443        | PD5003 | ET          | unmutated         | 15  | 101566186 | C        | A                 | 19             | 0.0                        | 52           | 11.5                     | LRRK1           | CCDS42086.1     | c.2249C>A         | p.A750D        | missense       | M                 |
| 444        | PD5003 | ET          | unmutated         | 5   | 156811442 | C        | A                 | 101            | 0.0                        | 82           | 8.5                      | ENSG00000204823 | ENST00000377571 | c.366C>A          | p.L122L        | silent         | M                 |
| 445        | PD5003 | ET          | unmutated         | 15  | 42742663  | C        | A                 | 215            | 0.0                        | 103          | 7.8                      | ZFP106          | CCDS32208.1     | c.1738G>T         | p.E580*        | nonsense       | M                 |
| 446        | PD5003 | ET          | unmutated         | 11  | 46742363  | C        | A                 | 35             | 0.0                        | 104          | 7.7                      | F2              | CCDS31476.1     | c.289C>A          | p.R97R         | silent         | M                 |
| 447        | PD5003 | ET          | unmutated         | 19  | 13054565  | _        | delGCAGA<42>AGGAG | 19             | 5.3                        | 18           | 22.2                     | CALR            | CCDS12288.1     | c.1092_1143del52  | p.L367fs*46    | frameshift     | M T C             |
| 448        | PD5004 | PMF         | unmutated         | 11  | 64084957  | C        | T                 | 13             | 0.0                        | 11           | 72.7                     | TRMT112         | CCDS8068.1      | c.42G>A           | p.R14R         | silent         | T                 |
| 449        | PD5004 | PMF         | unmutated         | 11  | 48286217  | G        | A                 | 66             | 0.0                        | 91           | 52.8                     | OR4X1           | CCDS31487.1     | c.805G>A          | p.V269I        | missense       | T                 |
| 450        | PD5004 | PMF         | unmutated         | 19  | 9088357   | A        | T                 | 105            | 0.0                        | 128          | 48.4                     | MUC16           | ENST00000397910 | c.3458T>A         | p.I1153N       | missense       | T                 |
| 451        | PD5004 | PMF         | unmutated         | 12  | 69107542  | A        | G                 | 187            | 0.0                        | 79           | 45.6                     | NUP107          | CCDS8985.1      | c.923A>G          | p.Q308R        | missense       | T                 |
| 452        | PD5004 | PMF         | unmutated         | 2   | 189406042 | G        | C                 | 130            | 0.0                        | 81           | 42.0                     | GULP1           | CCDS2295.1      | c.396G>C          | p.K132N        | missense       | T                 |
| 453        | PD5004 | PMF         | unmutated         | 4   | 37448315  | C        | T                 | 106            | 0.0                        | 98           | 40.8                     | KIAA1239        | CCDS47040.1     | c.4705C>T         | p.R1569W       | missense       | T                 |
| 454        | PD5004 | PMF         | unmutated         | 21  | 44514777  | T        | G                 | 48             | 0.0                        | 38           | 39.5                     | U2AF1           | CCDS13694.1     | c.470A>C          | p.Q157P        | missense       | T                 |
| 455        | PD5004 | PMF         | unmutated         | 5   | 150908881 | C        | T                 | 54             | 0.0                        | 54           | 31.5                     | FAT2            | CCDS4317.1      | c.9884G>A         | p.R3295Q       | missense       | T                 |
| 456        | PD5004 | PMF         | unmutated         | 20  | 31022662  | _        | delC              | 37             | 0.0                        | 17           | 5.9                      | ASXL1           | CCDS13201.1     | c.2147delC        | p.A716fs*9     | frameshift     | T                 |
| 457        | PD5004 | PMF         | unmutated         | 19  | 13054565  | _        | delGCAGA<42>AGGAG | 37             | 0.0                        | 50           | 20.0                     | CALR            | CCDS12288.1     | c.1092_1143del52  | p.L367fs*46    | frameshift     | M C               |
| 458        | PD5005 | PMF         | unmutated         | 16  | 30393447  | G        | A                 | 23             | 0.0                        | 10           | 60.0                     | SEPT1           | CCDS10678.1     | c.148C>T          | p.L50F         | missense       | T                 |
| 459        | PD5005 | PMF         | unmutated         | 11  | 124007722 | C        | T                 | 72             | 1.4                        | 64           | 53.1                     | VWASA           | CCDS8444.1      | c.1626C>T         | p.N542N        | silent         | T                 |
| 460        | PD5005 | PMF         | unmutated         | 22  | 30163410  | C        | T                 | 46             | 0.0                        | 74           | 51.4                     | UQCR10          | CCDS46680.1     | c.23C>T           | p.S8L          | missense       | T                 |
| 461        | PD5005 | PMF         | unmutated         | 3   | 128344793 | T        | C                 | 53             | 1.9                        | 49           | 51.0                     | RPN1            | CCDS3051.1      | c.1199A>G         | p.Y400C        | missense       | T                 |
| 462        | PD5005 | PMF         | unmutated         | 18  | 32374119  | T        | A                 | 77             | 1.3                        | 70           | 50.0                     | DTNA            | CCDS42425.1     | c.267T>A          | p.F89L         | missense       | T                 |
| 463        | PD5005 | PMF         | unmutated         | 14  | 63784482  | C        | T                 | 62             | 0.0                        | 36           | 47.2                     | GPHB5           | ENST00000314140 | c.82G>A           | p.G28R         | missense       | T                 |
| 464        | PD5005 | PMF         | unmutated         | 20  | 9561377   | G        | A                 | 166            | 1.8                        | 106          | 46.2                     | PAK7            | CCDS13107.1     | c.405C>T          | p.S135S        | silent         | T                 |
| 465        | PD5005 | PMF         | unmutated         | 14  | 32034248  | C        | T                 | 109            | 1.8                        | 26           | 42.3                     | NUBPL           | CCDS41940.1     | c.285C>T          | p.N95N         | silent         | T                 |
| 466        | PD5005 | PMF         | unmutated         | 4   | 106196347 | _        | delIT             | 238            | 3.8                        | 123          | 42.3                     | TET2            | CCDS47120.1     | c.4680delT        | p.S1561fs*10   | frameshift     | T C               |

| Variant No | PDID   | MPN Subtype | JAK2/MPL mutation | Chr | Position  | Ref base | Mut base          | Germline reads | Germline allele burden (%) | Tumour reads | Tumour allele burden (%) | Gene            | CCDS            | DNA Change       | Protein Change | Type of Change | Validation Method |
|------------|--------|-------------|-------------------|-----|-----------|----------|-------------------|----------------|----------------------------|--------------|--------------------------|-----------------|-----------------|------------------|----------------|----------------|-------------------|
| 467        | PD5005 | PMF         | unmutated         | 19  | 39234790  | C        | T                 | 48             | 2.1                        | 37           | 40.5                     | CAPN12          | CCDS12519.1     | c.16G>A          | p.G6R          | missense       | T                 |
| 468        | PD5005 | PMF         | unmutated         | 6   | 107390423 | G        | A                 | 17             | 0.0                        | 23           | 39.1                     | BEND3           | CCDS34507.1     | c.1972C>T        | p.R658C        | missense       | T                 |
| 469        | PD5005 | PMF         | unmutated         | 10  | 26856423  | G        | A                 | 19             | 0.0                        | 28           | 35.7                     | APBB1P          | CCDS31167.1     | Non-coding       | r.2462g>a      | UTR            | T                 |
| 470        | PD5005 | PMF         | unmutated         | 7   | 99711538  | G        | T                 | 52             | 0.0                        | 49           | 10.2                     | TAF6            | CCDS5686.1      | c.196C>A         | p.L66I         | missense       | T                 |
| 471        | PD5005 | PMF         | unmutated         | 19  | 13054575  | _        | delAAGGA<24>AGAGG | 6              | 0.0                        | 15           | 20.0                     | CALR            | CCDS12288.1     | c.1102_1135del34 | p.K368fs*51    | frameshift     | M T C             |
| 472        | PD5008 | PMF         | JAK2              | 9   | 5073770   | G        | T                 | 131            | 0.0                        | 80           | 90.0                     | JAK2            | CCDS6457.1      | c.1849G>T        | p.V617F        | missense       | T                 |
| 473        | PD5008 | PMF         | JAK2              | 1   | 240656623 | C        | T                 | 25             | 0.0                        | 38           | 57.9                     | GREM2           | CCDS31070.1     | c.153G>A         | p.E51E         | silent         | T                 |
| 474        | PD5008 | PMF         | JAK2              | X   | 53565939  | T        | C                 | 17             | 0.0                        | 14           | 57.1                     | HUWE1           | CCDS35301.1     | c.11735A>G       | p.K3912R       | missense       | T                 |
| 475        | PD5008 | PMF         | JAK2              | 17  | 51900732  | C        | T                 | 103            | 1.0                        | 104          | 47.1                     | KIF2B           | CCDS32685.1     | c.338C>T         | p.T113M        | missense       | T                 |
| 476        | PD5008 | PMF         | JAK2              | 2   | 113785532 | T        | G                 | 69             | 0.0                        | 49           | 46.9                     | IL1F8           | CCDS2110.1      | c.422A>C         | p.K141T        | missense       | T                 |
| 477        | PD5008 | PMF         | JAK2              | 15  | 56207723  | T        | C                 | 106            | 0.0                        | 61           | 45.9                     | NEDD4           | CCDS10156.1     | c.1307A>G        | p.N436S        | missense       | T                 |
| 478        | PD5008 | PMF         | JAK2              | X   | 153594943 | G        | T                 | 39             | 0.0                        | 62           | 45.2                     | FLNA            | CCDS48194.1     | c.1052C>A        | p.T351K        | missense       | T                 |
| 479        | PD5008 | PMF         | JAK2              | 11  | 26569053  | C        | T                 | 193            | 0.5                        | 122          | 45.1                     | ANO3            | CCDS31447.1     | c.1245C>T        | p.C415C        | silent         | T                 |
| 480        | PD5008 | PMF         | JAK2              | 6   | 117861907 | G        | A                 | 103            | 1.0                        | 95           | 43.2                     | DCBLD1          | CCDS34522.1     | c.1178G>A        | p.R393Q        | missense       | T                 |
| 481        | PD5008 | PMF         | JAK2              | 3   | 183029486 | G        | A                 | 90             | 0.0                        | 65           | 38.5                     | MCF2L2          | CCDS3243.1      | c.828C>T         | p.P276P        | silent         | T                 |
| 482        | PD5008 | PMF         | JAK2              | 19  | 9071537   | C        | T                 | 98             | 0.0                        | 77           | 37.7                     | MUC16           | ENST00000397910 | c.15909G>A       | p.Q5303Q       | silent         | T                 |
| 483        | PD5008 | PMF         | JAK2              | 7   | 141884901 | A        | G                 | 53             | 0.0                        | 48           | 37.5                     | ENSG00000204987 | ENST00000477922 | c.3853A>G        | p.I1285V       | missense       | T                 |
| 484        | PD5008 | PMF         | JAK2              | 1   | 43680991  | G        | C                 | 183            | 0.0                        | 159          | 35.2                     | ENSG00000164012 | ENST00000372492 | c.103G>C         | p.W35C         | missense       | T                 |
| 485        | PD5008 | PMF         | JAK2              | 4   | 154624391 | A        | G                 | 70             | 0.0                        | 47           | 27.7                     | TLR2            | CCDS3784.1      | c.332A>G         | p.Y111C        | missense       | T                 |
| 486        | PD5008 | PMF         | JAK2              | 22  | 17956638  | A        | C                 | 114            | 0.0                        | 104          | 26.9                     | CECR2           | ENST00000262608 | c.12A>C          | p.E4D          | missense       | T                 |
| 487        | PD5008 | PMF         | JAK2              | 14  | 50472497  | G        | T                 | 156            | 0.6                        | 150          | 26.0                     | C14orf182       | CCDS41949.1     | c.21C>A          | p.T7T          | silent         | T                 |
| 488        | PD5008 | PMF         | JAK2              | 1   | 198665855 | A        | G                 | 109            | 0.0                        | 87           | 25.3                     | PTPRC           | CCDS1397.1      | c.109A>G         | p.K37E         | missense       | T                 |
| 489        | PD5008 | PMF         | JAK2              | 7   | 131194320 | G        | A                 | 54             | 0.0                        | 81           | 24.7                     | PODXL           | CCDS34755.1     | c.827C>T         | p.T276I        | missense       | T                 |
| 490        | PD5008 | PMF         | JAK2              | 12  | 118298169 | T        | C                 | 17             | 0.0                        | 20           | 20.0                     | KSR2            | ENST00000339824 | c.248A>G         | p.N83S         | missense       | T                 |
| 491        | PD5008 | PMF         | JAK2              | 9   | 111617084 | C        | T                 | 61             | 0.0                        | 62           | 16.1                     | ACTL7B          | CCDS6771.1      | c.1127G>A        | p.R376K        | missense       | T                 |
| 492        | PD5008 | PMF         | JAK2              | 11  | 134126530 | G        | A                 | 48             | 0.0                        | 66           | 15.2                     | ACAD8           | CCDS8498.1      | c.198G>A         | p.E66E         | silent         | T                 |
| 493        | PD5008 | PMF         | JAK2              | 7   | 143826291 | T        | A                 | 82             | 1.2                        | 56           | 12.5                     | OR2A14          | CCDS43672.1     | c.86T>A          | p.L29H         | missense       | T                 |
| 494        | PD5008 | PMF         | JAK2              | 4   | 106164862 | indel    | delCT             | 29             | 0.0                        | 27           | 3.7                      | TET2            | CCDS47120.1     | c.3730_3731delCT | p.Y1245fs*22   | frameshift     | T                 |
| 495        | PD5014 | PMF         | unmutated         | 12  | 56087082  | G        | A                 | 12             | 0.0                        | 47           | 42.6                     | ITGA7           | CCDS8888.1      | c.2555C>T        | p.S852L        | missense       | T                 |
| 496        | PD5014 | PMF         | unmutated         | 1   | 233190215 | T        | G                 | 68             | 1.5                        | 87           | 27.6                     | PCNXL2          | CCDS44335.1     | c.4150A>C        | p.N1384H       | missense       | T                 |
| 497        | PD5014 | PMF         | unmutated         | 19  | 13054565  | _        | delGCAGA<42>AGGAG | 18             | 0.0                        | 22           | 36.4                     | CALR            | CCDS12288.1     | c.1092_1143del52 | p.L367fs*46    | frameshift     | M T C             |
| 498        | PD5027 | PMF         | JAK2              | X   | 106066631 | A        | T                 | 64             | 1.6                        | 47           | 100.0                    | TBC1D8B         | CCDS14522.1     | c.762A>T         | p.R254S        | missense       | T                 |
| 499        | PD5027 | PMF         | JAK2              | 3   | 88040034  | _        | delC              | 135            | 1.0                        | 128          | 72.0                     | HTR1F           | CCDS2920.1      | c.135delC        | p.I45fs*6      | frameshift     | T                 |
| 500        | PD5027 | PMF         | JAK2              | 11  | 7723322   | C        | T                 | 22             | 0.0                        | 27           | 55.6                     | OVC2            | ENST00000331572 | c.500G>A         | p.R167Q        | missense       | T                 |
| 501        | PD5027 | PMF         | JAK2              | 9   | 115421926 | G        | A                 | 28             | 0.0                        | 11           | 54.6                     | KIAA1958        | CCDS35108.1     | c.1728G>A        | p.A576A        | silent         | T                 |
| 502        | PD5027 | PMF         | JAK2              | 14  | 64408426  | C        | T                 | 55             | 0.0                        | 101          | 50.5                     | SYNE2           | CCDS9761.2      | c.155C>T         | p.S52L         | missense       | T                 |
| 503        | PD5027 | PMF         | JAK2              | 1   | 152280503 | C        | T                 | 62             | 1.6                        | 301          | 49.2                     | FLG             | CCDS30860.1     | c.6859G>A        | p.E2287K       | missense       | T                 |
| 504        | PD5027 | PMF         | JAK2              | 5   | 153406840 | C        | T                 | 41             | 0.0                        | 49           | 49.0                     | FAM114A2        | CCDS4323.1      | c.685G>A         | p.V229M        | missense       | T                 |
| 505        | PD5027 | PMF         | JAK2              | 14  | 62547699  | G        | A                 | 38             | 0.0                        | 66           | 48.5                     | SYT16           | CCDS45121.1     | c.1141G>A        | p.D381N        | missense       | T                 |
| 506        | PD5027 | PMF         | JAK2              | 22  | 29095854  | T        | C                 | 157            | 1.3                        | 155          | 47.7                     | CHEK2           | CCDS33629.1     | c.1109A>G        | p.Y370C        | missense       | T                 |
| 507        | PD5027 | PMF         | JAK2              | 21  | 31066267  | G        | A                 | 69             | 0.0                        | 76           | 47.4                     | GRIK1           | CCDS42913.1     | c.234C>T         | p.T78T         | silent         | T                 |
| 508        | PD5027 | PMF         | JAK2              | 5   | 64510649  | C        | T                 | 116            | 0.0                        | 66           | 47.0                     | ADAMT56         | CCDS3983.2      | c.2547G>A        | p.W849*        | nonsense       | T                 |
| 509        | PD5027 | PMF         | JAK2              | 18  | 56001092  | G        | A                 | 88             | 0.0                        | 114          | 46.5                     | NEDD4L          | CCDS45872.1     | c.1033G>A        | p.D345N        | missense       | T                 |
| 510        | PD5027 | PMF         | JAK2              | 16  | 61854953  | G        | A                 | 60             | 0.0                        | 39           | 46.2                     | CDH8            | CCDS10802.1     | c.900C>T         | p.A300A        | silent         | T                 |
| 511        | PD5027 | PMF         | JAK2              | 12  | 111159955 | T        | C                 | 41             | 0.0                        | 49           | 44.9                     | PPP1CC          | CCDS9150.1      | c.867A>G         | p.L289L        | silent         | T                 |
| 512        | PD5027 | PMF         | JAK2              | 2   | 71366958  | T        | C                 | 120            | 0.0                        | 129          | 44.2                     | MPHOSPH10       | CCDS1916.1      | c.1274T>C        | p.L425P        | missense       | T                 |
| 513        | PD5027 | PMF         | JAK2              | 2   | 71366959  | G        | T                 | 119            | 0.0                        | 125          | 44.0                     | MPHOSPH10       | CCDS1916.1      | c.1275G>T        | p.L425L        | silent         | T                 |
| 514        | PD5027 | PMF         | JAK2              | 2   | 71366960  | G        | T                 | 119            | 0.0                        | 125          | 44.0                     | MPHOSPH10       | CCDS1916.1      | c.1276G>T        | p.E426*        | nonsense       | T                 |
| 515        | PD5027 | PMF         | JAK2              | 9   | 5073770   | G        | T                 | 112            | 0.9                        | 94           | 43.6                     | JAK2            | CCDS6457.1      | c.1849G>T        | p.V617F        | missense       | T                 |
| 516        | PD5027 | PMF         | JAK2              | 21  | 44514777  | T        | G                 | 44             | 0.0                        | 53           | 43.4                     | U2AF1           | CCDS13694.1     | c.470A>C         | p.Q157P        | missense       | T                 |
| 517        | PD5027 | PMF         | JAK2              | 6   | 31896514  | C        | T                 | 37             | 0.0                        | 33           | 42.4                     | C2              | CCDS4728.1      | c.262C>T         | p.R88C         | missense       | T                 |
| 518        | PD5027 | PMF         | JAK2              | 8   | 55539545  | A        | C                 | 158            | 0.0                        | 203          | 42.4                     | RP1             | CCDS6160.1      | c.3103A>C        | p.N1035H       | missense       | T                 |

| Variant No | PDID   | MPN Subtype | JAK2/MPL mutation | Chr | Position  | Ref base | Mut base | Germline reads | Germline allele burden (%) | Tumour reads | Tumour allele burden (%) | Gene            | CCDS            | DNA Change       | Protein Change | Type of Change   | Validation Method |
|------------|--------|-------------|-------------------|-----|-----------|----------|----------|----------------|----------------------------|--------------|--------------------------|-----------------|-----------------|------------------|----------------|------------------|-------------------|
| 519        | PD5027 | PMF         | JAK2              | 13  | 24861007  | G        | A        | 23             | 0.0                        | 48           | 41.7                     | SPATA13         | CCDS9305.1      | c.711G>A         | p.K237K        | silent           | T                 |
| 520        | PD5027 | PMF         | JAK2              | 2   | 160964243 | G        | T        | 70             | 1.4                        | 68           | 39.7                     | ITGB6           | CCDS2212.1      | c.2215C>A        | p.R739S        | missense         | T                 |
| 521        | PD5027 | PMF         | JAK2              | 3   | 186002449 | C        | T        | 63             | 1.6                        | 76           | 38.2                     | DGKG            | CCDS3274.1      | c.594G>A         | p.A198A        | silent           | T                 |
| 522        | PD5027 | PMF         | JAK2              | 20  | 31022937  | _        | delC     | 44             | 0.0                        | 69           | 31.0                     | ASXL1           | CCDS13201.1     | c.2422delC       | p.P808fs*10    | frameshift       | T                 |
| 523        | PD5029 | PPV-MF      | JAK2              | 9   | 5073770   | G        | T        | 134            | 0.0                        | 135          | 47.4                     | JAK2            | CCDS6457.1      | c.1849G>T        | p.V617F        | missense         | T                 |
| 524        | PD5029 | PPV-MF      | JAK2              | 2   | 121995385 | C        | T        | 13             | 0.0                        | 18           | 27.8                     | TFCP2L1         | CCDS2134.1      | c.902G>A         | p.G301D        | missense         | T                 |
| 525        | PD5029 | PPV-MF      | JAK2              | 6   | 117631363 | G        | A        | 133            | 0.8                        | 121          | 25.6                     | ROS1            | CCDS5116.1      | c.6315C>T        | p.L2105L       | silent           | T                 |
| 526        | PD5029 | PPV-MF      | JAK2              | 6   | 159653545 | G        | A        | 17             | 0.0                        | 40           | 25.0                     | FNDC1           | CCDS47512.1     | c.2001G>A        | p.R667R        | silent           | T                 |
| 527        | PD5029 | PPV-MF      | JAK2              | 7   | 31016113  | G        | T        | 12             | 0.0                        | 21           | 23.8                     | GHRHR           | CCDS5432.1      | c.1044G>T        | p.L348L        | silent           | T                 |
| 528        | PD5029 | PPV-MF      | JAK2              | 12  | 7586183   | T        | C        | 162            | 0.6                        | 234          | 22.2                     | CD163L1         | CCDS8577.1      | c.232A>G         | p.N78D         | missense         | T                 |
| 529        | PD5029 | PPV-MF      | JAK2              | 8   | 134472081 | C        | T        | 31             | 0.0                        | 157          | 19.8                     | ST3GAL1         | CCDS6373.1      | c.949G>A         | p.D317N        | missense         | T                 |
| 530        | PD5029 | PPV-MF      | JAK2              | 12  | 11461420  | G        | A        | 110            | 0.0                        | 181          | 18.8                     | PRB4            | CCDS8641.1      | c.497C>T         | p.P166L        | missense         | T                 |
| 531        | PD5029 | PPV-MF      | JAK2              | 8   | 67808529  | A        | G        | 64             | 0.0                        | 85           | 17.7                     | C8orf45         | CCDS6197.2      | c.1404A>G        | p.S468S        | silent           | T                 |
| 532        | PD5029 | PPV-MF      | JAK2              | 2   | 197530377 | G        | A        | 46             | 0.0                        | 150          | 15.3                     | CCDC150         | CCDS46478.1     | c.732G>A         | p.M244I        | missense         | T                 |
| 533        | PD5029 | PPV-MF      | JAK2              | 1   | 10363911  | G        | A        | 99             | 0.0                        | 62           | 11.3                     | KIF1B           | CCDS112.1       | c.2668G>A        | p.V890I        | missense         | T                 |
| 534        | PD5029 | PPV-MF      | JAK2              | 1   | 92647821  | _        | delAC    | 131            | 1.0                        | 72           | 11.1                     | KIAA1107        | CCDS44172.1     | c.3267_3268delAC | p.Q1090fs*17   | frameshift       | T                 |
| 535        | PD5111 | PV          | JAK2              | 9   | 5073770   | G        | T        | 260            | 2.6                        | 228          | 44.3                     | JAK2            | CCDS6457.1      | c.1849G>T        | p.V617F        | missense         | T                 |
| 536        | PD5115 | PV          | JAK2              | 9   | 5073770   | G        | T        | 162            | 4.3                        | 86           | 74.4                     | JAK2            | CCDS6457.1      | c.1849G>T        | p.V617F        | missense         | M                 |
| 537        | PD5115 | PV          | JAK2              | 17  | 39296629  | G        | A        | 172            | 1.2                        | 155          | 41.9                     | KRTAP4-6        | ENST00000345847 | c.111C>T         | p.R37R         | silent           | M                 |
| 538        | PD5115 | PV          | JAK2              | 5   | 115351332 | G        | T        | 83             | 0.0                        | 56           | 39.3                     | LVRN            | CCDS4124.1      | c.2626G>T        | p.E876*        | nonsense         | M                 |
| 539        | PD5115 | PV          | JAK2              | 2   | 1312324   | C        | T        | 146            | 0.7                        | 132          | 37.9                     | SNTG2           | CCDS46220.1     | c.1343C>T        | p.A448V        | missense         | M                 |
| 540        | PD5115 | PV          | JAK2              | 11  | 101818851 | C        | T        | 76             | 2.6                        | 35           | 37.1                     | KIAA1377        | CCDS31658.1     | c.484C>T         | p.R162C        | missense         | M                 |
| 541        | PD5115 | PV          | JAK2              | 8   | 56436264  | C        | T        | 101            | 3.0                        | 79           | 35.4                     | XKR4            | CCDS34893.1     | c.1431C>T        | p.L477L        | silent           | M                 |
| 542        | PD5115 | PV          | JAK2              | 16  | 67942955  | G        | A        | 37             | 5.4                        | 43           | 34.9                     | PSKH1           | CCDS10851.1     | c.303G>A         | p.K101K        | silent           | M                 |
| 543        | PD5115 | PV          | JAK2              | 16  | 21261645  | C        | A        | 104            | 5.8                        | 103          | 30.1                     | ANKS4B          | CCDS42130.1     | c.758C>A         | p.S253*        | nonsense         | M                 |
| 544        | PD5115 | PV          | JAK2              | 5   | 175392025 | G        | A        | 86             | 1.2                        | 111          | 27.0                     | THOC3           | CCDS4397.1      | c.558C>T         | p.N186N        | silent           | M                 |
| 545        | PD5115 | PV          | JAK2              | X   | 13780563  | T        | A        | 121            | 0.0                        | 65           | 9.2                      | OFD1            | CCDS14157.1     | c.2488T>A        | p.S830T        | missense         | M                 |
| 546        | PD5115 | PV          | JAK2              | 2   | 231326080 | G        | C        | 86             | 0.0                        | 99           | 5.1                      | SP100           | CCDS42832.1     | c.924G>C         | p.E308D        | missense         | M                 |
| 547        | PD5117 | PV          | JAK2              | 1   | 196748430 | A        | C        | 90             | 4.4                        | 78           | 20.5                     | CFHR3           | CCDS30958.1     | c.197A>C         | p.Y66S         | missense         | T                 |
| 548        | PD5117 | PV          | JAK2              | 6   | 31632125  | T        | C        | 63             | 0.0                        | 39           | 10.3                     | BAT4            | CCDS4711.1      | c.131A>G         | p.Y44C         | missense         | T                 |
| 549        | PD5117 | PV          | JAK2              | 12  | 57457968  | T        | C        | 231            | 1.7                        | 220          | 7.3                      | TMEM194A        | CCDS44927.1     | c.640A>G         | p.K214E        | missense         | T                 |
| 550        | PD5117 | PV          | JAK2              | 6   | 49483372  | G        | T        | 294            | 2.4                        | 239          | 6.7                      | GLYATL3         | CCDS47440.1     | c.85G>T          | p.G29*         | nonsense         | T                 |
| 551        | PD5117 | PV          | JAK2              | 9   | 5073770   | G        | T        | 181            | 1.1                        | 164          | 5.5                      | JAK2            | CCDS6457.1      | c.1849G>T        | p.V617F        | missense         | T                 |
| 552        | PD5120 | PV          | JAK2              | 9   | 5073770   | G        | T        | 212            | 9.4                        | 259          | 95.0                     | JAK2            | CCDS6457.1      | c.1849G>T        | p.V617F        | missense         | T                 |
| 553        | PD5120 | PV          | JAK2              | 4   | 41984532  | T        | C        | 91             | 6.6                        | 177          | 48.0                     | DCAF4L1         | CCDS33978.1     | c.723T>C         | p.N241N        | silent           | T                 |
| 554        | PD5120 | PV          | JAK2              | 6   | 42633250  | A        | G        | 305            | 2.3                        | 266          | 47.7                     | UBR2            | CCDS4870.1      | c.3802A>G        | p.N1268D       | missense         | T                 |
| 555        | PD5120 | PV          | JAK2              | 12  | 71092090  | T        | A        | 300            | 2.3                        | 143          | 44.1                     | PTPRR           | CCDS8998.1      | c.1234A>T        | p.I412F        | missense         | T                 |
| 556        | PD5120 | PV          | JAK2              | 1   | 74945966  | G        | A        | 81             | 2.5                        | 152          | 42.1                     | LRRCS5          | ENST00000416014 | c.775C>T         | p.Q259*        | nonsense         | T                 |
| 557        | PD5120 | PV          | JAK2              | 6   | 41705484  | G        | A        | 50             | 0.0                        | 93           | 36.6                     | PGC             | CCDS4859.1      | c.998C>T         | p.S333F        | missense         | T                 |
| 558        | PD5120 | PV          | JAK2              | 5   | 82360885  | A        | C        | 278            | 3.2                        | 467          | 31.1                     | TMEM167A        | ENST00000502346 | c.55T>G          | p.C19G         | missense         | T                 |
| 559        | PD5120 | PV          | JAK2              | 12  | 120146005 | G        | A        | 107            | 1.9                        | 199          | 16.6                     | CIT             | CCDS9192.1      | c.5064C>T        | p.C1688C       | silent           | T                 |
| 560        | PD5120 | PV          | JAK2              | 4   | 123274060 | A        | G        | 227            | 0.9                        | 247          | 16.2                     | KIAA1109        | CCDS43267.1     | c.13851A>G       | p.L4617L       | silent           | T                 |
| 561        | PD5120 | PV          | JAK2              | 5   | 140772789 | G        | T        | 110            | 0.0                        | 225          | 16.0                     | PCDHGA12        | CCDS47291.1     | c.409G>T         | p.D137Y        | missense         | T                 |
| 562        | PD5120 | PV          | JAK2              | 5   | 16703177  | T        | C        | 311            | 0.0                        | 351          | 11.1                     | MYO10           | ENST00000427430 | c.2400A>G        | p.K800K        | silent           | T                 |
| 563        | PD5120 | PV          | JAK2              | X   | 133559280 | G        | A        | 114            | 3.5                        | 139          | 10.8                     | PHF6            | CCDS14639.1     | c.1018G>A        | p.E340K        | missense         | T                 |
| 564        | PD5120 | PV          | JAK2              | 14  | 65068268  | C        | T        | 30             | 0.0                        | 78           | 10.3                     | ENSG00000238163 | ENST00000428403 | c.96G>A          | p.E32E         | silent           | T                 |
| 565        | PD5120 | PV          | JAK2              | 6   | 30919290  | C        | A        | 161            | 0.0                        | 193          | 9.8                      | DPCR1           | ENST00000462446 | c.3049C>A        | p.P1017T       | missense         | T                 |
| 566        | PD5120 | PV          | JAK2              | X   | 37526605  | G        | T        | 67             | 0.0                        | 96           | 9.4                      | LANCL3          | CCDS14240.1     | c.966G>T         | p.R322R        | silent           | T                 |
| 567        | PD5120 | PV          | JAK2              | 1   | 29323832  | G        | A        | 260            | 0.8                        | 243          | 8.2                      | EPB41           | CCDS332.1       | c.159+1G>A       | p.?            | essential splice | T                 |
| 568        | PD5120 | PV          | JAK2              | 5   | 32089484  | C        | T        | 62             | 0.0                        | 150          | 8.0                      | PDZD2           | CCDS34137.1     | c.5930C>T        | p.T1977M       | missense         | T                 |
| 569        | PD5120 | PV          | JAK2              | 14  | 96924440  | C        | T        | 65             | 1.5                        | 148          | 5.4                      | AK7             | CCDS9945.1      | c.1248C>T        | p.N416N        | silent           | T                 |
| 570        | PD5120 | PV          | JAK2              | 9   | 93641130  | C        | G        | 173            | 0.0                        | 268          | 4.9                      | SYK             | CCDS6688.1      | c.1476C>G        | p.H492Q        | missense         | T                 |

| Variant No | PDID   | MPN Subtype | JAK2/MPL mutation | Chr | Position  | Ref base | Mut base  | Germline reads | Germline allele burden (%) | Tumour reads | Tumour allele burden (%) | Gene            | CCDS            | DNA Change           | Protein Change  | Type of Change   | Validation Method |
|------------|--------|-------------|-------------------|-----|-----------|----------|-----------|----------------|----------------------------|--------------|--------------------------|-----------------|-----------------|----------------------|-----------------|------------------|-------------------|
| 571        | PD5120 | PV          | JAK2              | 8   | 39468078  | T        | A         | 196            | 0.5                        | 171          | 4.7                      | ADAM18          | CCDS6113.1      | c.375T>A             | p.Y125*         | nonsense         | T                 |
| 572        | PD5121 | PV          | JAK2              | 9   | 5073770   | G        | T         | 160            | 4.3                        | 130          | 16.2                     | JAK2            | CCDS6457.1      | c.1849G>T            | p.V617F         | missense         | T                 |
| 573        | PD5122 | PV          | JAK2              | 9   | 5073770   | G        | T         | 131            | 0.0                        | 216          | 24.5                     | JAK2            | CCDS6457.1      | c.901G>T             | p.G301W         | missense         | T                 |
| 574        | PD5122 | PV          | JAK2              | 3   | 194373671 | C        | T         | 92             | 4.4                        | 191          | 13.6                     | LSG1            | CCDS33922.1     | c.960G>A             | p.T320T         | silent           | T                 |
| 575        | PD5122 | PV          | JAK2              | 9   | 136083552 | C        | T         | 34             | 0.0                        | 61           | 11.5                     | OBP2B           | CCDS6961.1      | c.245G>A             | p.R82Q          | missense         | T                 |
| 576        | PD5122 | PV          | JAK2              | 15  | 62945497  | G        | T         | 70             | 0.0                        | 115          | 7.0                      | TLN2            | CCDS32261.1     | c.501G>T             | p.L167L         | silent           | T                 |
| 577        | PD5122 | PV          | JAK2              | 19  | 59028367  | C        | T         | 19             | 0.0                        | 180          | 6.1                      | ZBTB45          | CCDS12984.1     | c.674G>A             | p.G225D         | missense         | T                 |
| 578        | PD5125 | PV          | JAK2              | 9   | 5070036   | -        | delATGAAG | 107            | 0.0                        | 49           | 10.2                     | JAK2            | CCDS6457.1      | c.1625_1630delATGAAG | p.E543D544delED | inframe          | T                 |
| 579        | PD5125 | PV          | JAK2              | 3   | 39104548  | A        | G         | 192            | 1.6                        | 148          | 10.1                     | WDR48           | CCDS33738.1     | c.56A>G              | p.Y19C          | missense         | T                 |
| 580        | PD5125 | PV          | JAK2              | 15  | 54006699  | G        | C         | 97             | 0.0                        | 71           | 8.5                      | WDR72           | CCDS10151.1     | c.523C>G             | p.L175V         | missense         | T                 |
| 581        | PD5125 | PV          | JAK2              | 2   | 169707629 | T        | C         | 110            | 0.9                        | 117          | 6.0                      | NOSTRIN         | CCDS42771.1     | c.666T>C             | p.L222L         | silent           | T                 |
| 582        | PD5125 | PV          | JAK2              | 2   | 107002777 | G        | A         | 418            | 0.5                        | 454          | 4.4                      | ENSG00000169659 | ENST00000324709 | c.91G>A              | p.A31T          | missense         | T                 |
| 583        | PD5125 | PV          | JAK2              | 9   | 5073770   | G        | T         | 217            | 0.0                        | 162          | 1.9                      | JAK2            | CCDS6457.1      | c.1849G>T            | p.V617F         | missense         | T C               |
| 584        | PD5134 | PV          | JAK2              | 12  | 125478381 | -        | insCTG    | 5              | 0.0                        | 12           | 33.3                     | BR13BP          | CCDS9262.1      | c.45_46insCTG        | p.L15_L16insL   | inframe          | M                 |
| 585        | PD5134 | PV          | JAK2              | 8   | 10470010  | G        | A         | 25             | 0.0                        | 61           | 9.8                      | RP111           | CCDS43708.1     | c.1598C>T            | p.S533L         | missense         | M                 |
| 586        | PD5134 | PV          | JAK2              | 9   | 5073770   | G        | T         | 146            | 0.0                        | 144          | 2.1                      | JAK2            | CCDS6457.1      | c.1849G>T            | p.V617F         | missense         | M                 |
| 587        | PD5135 | PV          | JAK2              | 9   | 5073770   | G        | T         | 158            | 0.0                        | 127          | 15.8                     | JAK2            | CCDS6457.1      | c.1849G>T            | p.V617F         | missense         | T                 |
| 588        | PD5135 | PV          | JAK2              | 19  | 9085683   | C        | T         | 251            | 0.0                        | 183          | 9.3                      | MUC16           | ENST00000397910 | c.6132G>A            | p.R2044R        | silent           | T                 |
| 589        | PD5135 | PV          | JAK2              | 2   | 234545779 | A        | C         | 338            | 0.3                        | 275          | 6.9                      | UGT1A10         | CCDS33403.1     | c.611A>C             | p.K204T         | missense         | T                 |
| 590        | PD5136 | PV          | JAK2              | 9   | 5073770   | G        | T         | 194            | 9.4                        | 124          | 34.7                     | JAK2            | CCDS6457.1      | c.1849G>T            | p.V617F         | missense         | T                 |
| 591        | PD5136 | PV          | JAK2              | 14  | 55819055  | G        | T         | 55             | 1.8                        | 65           | 16.9                     | FBXO34          | CCDS32086.1     | c.1947G>T            | p.W649C         | missense         | T                 |
| 592        | PD5138 | PV          | JAK2              | 9   | 5073770   | G        | T         | 169            | 12.4                       | 156          | 76.9                     | JAK2            | CCDS6457.1      | c.1849G>T            | p.V617F         | missense         | T                 |
| 593        | PD5138 | PV          | JAK2              | 2   | 234708446 | C        | T         | 37             | 5.4                        | 25           | 48.0                     | HEATR7B1        | ENST00000396517 | c.1443C>T            | p.H481H         | silent           | T                 |
| 594        | PD5138 | PV          | JAK2              | 9   | 87563482  | G        | A         | 31             | 3.2                        | 43           | 37.2                     | NTRK2           | CCDS6671.1      | c.1870G>A            | p.V624M         | missense         | T                 |
| 595        | PD5138 | PV          | JAK2              | 1   | 234509418 | C        | T         | 98             | 6.1                        | 101          | 31.7                     | C1orf31         | ENST00000424237 | c.206C>T             | p.A69V          | missense         | T                 |
| 596        | PD5141 | ET          | JAK2              | 20  | 42320934  | A        | T         | 85             | 0.0                        | 68           | 25.0                     | MYBL2           | CCDS13322.1     | c.638A>T             | p.Q213L         | missense         | T                 |
| 597        | PD5141 | ET          | JAK2              | 6   | 117995041 | G        | A         | 24             | 0.0                        | 25           | 24.0                     | ALS90303.1      | ENST00000501802 | Non-coding           | RNA             | T                |                   |
| 598        | PD5141 | ET          | JAK2              | 9   | 5073770   | G        | T         | 195            | 0.7                        | 186          | 23.7                     | JAK2            | CCDS6457.1      | c.1849G>T            | p.V617F         | missense         | T                 |
| 599        | PD5141 | ET          | JAK2              | 2   | 103300686 | G        | T         | 165            | 0.0                        | 145          | 22.8                     | SLC9A2          | CCDS2062.1      | c.1316G>T            | p.G439V         | missense         | T                 |
| 600        | PD5141 | ET          | JAK2              | 10  | 129347805 | T        | A         | 150            | 0.0                        | 129          | 20.2                     | NPS             | CCDS41577.1     | c.61T>A              | p.F21I          | missense         | T                 |
| 601        | PD5141 | ET          | JAK2              | 12  | 42499828  | T        | A         | 68             | 0.0                        | 117          | 18.0                     | GXYLT1          | CCDS41772.1     | c.656A>T             | p.D219V         | missense         | T                 |
| 602        | PD5141 | ET          | JAK2              | 10  | 27448599  | G        | A         | 133            | 0.0                        | 136          | 17.7                     | MASTL           | CCDS7153.1      | c.376G>A             | p.G126S         | missense         | T                 |
| 603        | PD5141 | ET          | JAK2              | 21  | 19169436  | C        | G         | 93             | 0.0                        | 84           | 16.7                     | C21orf91        | CCDS42907.1     | c.128-1G>C           | p.?             | essential splice | T                 |
| 604        | PD5141 | ET          | JAK2              | 12  | 52883847  | C        | T         | 69             | 0.0                        | 64           | 14.1                     | KRT6A           | CCDS41786.1     | c.1083G>A            | p.E361E         | silent           | T                 |
| 605        | PD5141 | ET          | JAK2              | 4   | 126240009 | G        | A         | 87             | 0.0                        | 116          | 13.8                     | FAT4            | CCDS3732.3      | c.2443G>A            | p.V815M         | missense         | T                 |
| 606        | PD5141 | ET          | JAK2              | 3   | 185146686 | A        | G         | 58             | 0.0                        | 47           | 12.8                     | MAP3K13         | CCDS3270.1      | c.317A>G             | p.D106G         | missense         | T                 |
| 607        | PD5141 | ET          | JAK2              | 21  | 31768892  | G        | T         | 71             | 0.0                        | 66           | 12.1                     | KRTAP13-1       | CCDS13590.2     | c.488G>T             | p.R163I         | missense         | T                 |
| 608        | PD5141 | ET          | JAK2              | 12  | 77423962  | T        | G         | 140            | 0.0                        | 197          | 8.6                      | E2F7            | CCDS9016.1      | c.1533A>C            | p.A511A         | silent           | T                 |
| 609        | PD5141 | ET          | JAK2              | 11  | 70224260  | T        | C         | 152            | 0.0                        | 150          | 7.3                      | PPF1A1          | CCDS31627.1     | c.3509T>C            | p.M1170T        | missense         | T                 |
| 610        | PD5141 | ET          | JAK2              | 6   | 106547343 | C        | A         | 108            | 0.0                        | 83           | 7.2                      | PRDM1           | CCDS5054.2      | c.580C>A             | p.Q194K         | missense         | T                 |
| 611        | PD5141 | ET          | JAK2              | 11  | 62563990  | A        | T         | 118            | 0.0                        | 125          | 7.2                      | NXF1            | CCDS8037.1      | c.1228T>A            | p.Y410N         | missense         | T                 |
| 612        | PD5141 | ET          | JAK2              | 14  | 94088623  | G        | A         | 246            | 0.0                        | 132          | 6.8                      | KIAA1409        | CCDS9911.2      | c.4513G>A            | p.A1505T        | missense         | T                 |
| 613        | PD5141 | ET          | JAK2              | 7   | 138363234 | G        | A         | 78             | 0.0                        | 89           | 6.7                      | SVOP1           | CCDS47721.1     | c.119C>T             | p.T40I          | missense         | T                 |
| 614        | PD5141 | ET          | JAK2              | 3   | 150396244 | G        | C         | 149            | 0.0                        | 100          | 6.0                      | FAM194A         | CCDS3151.2      | c.1209C>G            | p.N403K         | missense         | T                 |
| 615        | PD5141 | ET          | JAK2              | 4   | 88986569  | C        | T         | 156            | 0.0                        | 184          | 5.4                      | PKD2            | CCDS3627.1      | c.2162C>T            | p.T721I         | missense         | T                 |
| 616        | PD5141 | ET          | JAK2              | 11  | 56086430  | A        | T         | 153            | 0.0                        | 99           | 5.1                      | OR8K3           | CCDS31527.1     | c.648A>T             | p.L216F         | missense         | T                 |
| 617        | PD5141 | ET          | JAK2              | 11  | 14825567  | T        | G         | 85             | 0.0                        | 102          | 4.9                      | PDE3B           | CCDS7817.1      | c.1493T>G            | p.L498R         | missense         | T                 |
| 618        | PD5141 | ET          | JAK2              | 18  | 56247362  | G        | A         | 213            | 0.0                        | 249          | 4.8                      | ALPK2           | CCDS11966.2     | c.646C>T             | p.L216F         | missense         | T                 |
| 619        | PD5141 | ET          | JAK2              | 19  | 53304616  | C        | A         | 447            | 0.0                        | 408          | 4.7                      | ZNF28           | CCDS33093.1     | c.323G>T             | p.G108V         | missense         | T                 |
| 620        | PD5148 | PV          | JAK2              | 2   | 170843295 | G        | C         | 128            | 4.7                        | 107          | 20.6                     | UBR3            | CCDS2238.2      | c.3775G>C            | p.A1259P        | missense         | M                 |
| 621        | PD5148 | PV          | JAK2              | 16  | 10274070  | C        | T         | 91             | 4.4                        | 86           | 17.4                     | GRIN2A          | CCDS10539.1     | c.199G>A             | p.V67M          | missense         | M                 |
| 622        | PD5148 | PV          | JAK2              | 7   | 86811566  | G        | A         | 149            | 2.0                        | 131          | 15.3                     | DMTF1           | CCDS5601.1      | c.733G>A             | p.D245N         | missense         | M                 |

| Variant No | PDID   | MPN Subtype | JAK2/MPL mutation | Chr | Position  | Ref base | Mut base | Germline reads | Germline allele burden (%) | Tumour reads | Tumour allele burden (%) | Gene            | CCDS            | DNA Change  | Protein Change | Type of Change | Validation Method |
|------------|--------|-------------|-------------------|-----|-----------|----------|----------|----------------|----------------------------|--------------|--------------------------|-----------------|-----------------|-------------|----------------|----------------|-------------------|
| 623        | PD5148 | PV          | JAK2              | 14  | 65240018  | C        | T        | 97             | 0.0                        | 78           | 7.7                      | SPTB            | CCDS32099.1     | c.5098G>A   | p.D1700N       | missense       | M                 |
| 624        | PD5148 | PV          | JAK2              | 9   | 5073770   | G        | T        | 158            | 0.0                        | 164          | 0.6                      | JAK2            | CCDS6457.1      | c.1849G>T   | p.V617F        | missense       | M                 |
| 625        | PD5151 | PV          | JAK2              | 9   | 5073770   | G        | T        | 211            | 2.8                        | 86           | 44.2                     | JAK2            | CCDS6457.1      | c.1849G>T   | p.V617F        | missense       | T                 |
| 626        | PD5151 | PV          | JAK2              | 9   | 34976632  | G        | A        | 75             | 1.3                        | 60           | 20.0                     | KIAA1045        | CCDS43796.1     | c.744G>A    | p.A248A        | silent         | T                 |
| 627        | PD5151 | PV          | JAK2              | 16  | 31419114  | G        | T        | 70             | 2.9                        | 57           | 19.3                     | ITGAD           | CCDS32438.1     | c.886G>T    | p.A296S        | missense       | T                 |
| 628        | PD5151 | PV          | JAK2              | 18  | 46690150  | A        | T        | 51             | 0.0                        | 27           | 18.5                     | DYM             | CCDS11937.1     | c.1468T>A   | p.S490T        | missense       | T                 |
| 629        | PD5151 | PV          | JAK2              | 4   | 160275139 | A        | G        | 141            | 2.1                        | 86           | 17.4                     | RAPGEF2         | CCDS43277.1     | c.4109A>G   | p.K1370R       | missense       | T                 |
| 630        | PD5151 | PV          | JAK2              | 2   | 171715377 | C        | T        | 83             | 3.6                        | 54           | 16.7                     | GAD1            | CCDS2239.1      | c.1585C>T   | p.P529S        | missense       | T                 |
| 631        | PD5151 | PV          | JAK2              | 11  | 57268286  | A        | C        | 45             | 2.2                        | 53           | 15.1                     | SLC43A1         | CCDS7958.1      | c.431T>G    | p.F144C        | missense       | T                 |
| 632        | PD5151 | PV          | JAK2              | 5   | 127599264 | G        | A        | 99             | 0.0                        | 73           | 13.7                     | FBN2            | CCDS34222.1     | c.8045C>T   | p.S2682L       | missense       | T                 |
| 633        | PD5151 | PV          | JAK2              | 8   | 133961162 | G        | A        | 177            | 1.7                        | 117          | 12.8                     | TG              | CCDS34944.1     | c.5375G>A   | p.R1792H       | missense       | T                 |
| 634        | PD5151 | PV          | JAK2              | 14  | 74969477  | C        | A        | 74             | 0.0                        | 79           | 11.4                     | LTBP2           | CCDS9831.1      | c.5049G>T   | p.E1683D       | missense       | T                 |
| 635        | PD5151 | PV          | JAK2              | 11  | 34156762  | A        | G        | 195            | 0.0                        | 146          | 10.3                     | NAT10           | CCDS7889.1      | c.1952A>G   | p.Y651C        | missense       | T                 |
| 636        | PD5151 | PV          | JAK2              | 18  | 59958820  | A        | G        | 275            | 0.4                        | 49           | 10.2                     | KIAA1468        | CCDS11979.2     | c.3415A>G   | p.R1139G       | missense       | T                 |
| 637        | PD5151 | PV          | JAK2              | 11  | 65622897  | T        | C        | 37             | 0.0                        | 51           | 9.8                      | CFL1            | CCDS8114.1      | c.411A>G    | p.A137A        | silent         | T                 |
| 638        | PD5151 | PV          | JAK2              | 2   | 198266822 | T        | A        | 151            | 0.7                        | 99           | 9.1                      | SF3B1           | CCDS33356.1     | c.2110A>T   | p.I704F        | missense       | T                 |
| 639        | PD5151 | PV          | JAK2              | 15  | 77450934  | G        | T        | 87             | 1.2                        | 55           | 9.1                      | ENSG00000173517 | CCDS42062.1     | c.3242C>A   | p.S1081Y       | missense       | T                 |
| 640        | PD5151 | PV          | JAK2              | 1   | 152052876 | T        | A        | 390            | 0.0                        | 382          | 8.1                      | ENSG00000215854 | ENST00000400998 | c.183A>T    | p.S61S         | silent         | T                 |
| 641        | PD5151 | PV          | JAK2              | 19  | 9075010   | A        | T        | 444            | 1.1                        | 210          | 8.1                      | MUC16           | ENST00000397910 | c.12436T>A  | p.S4146T       | missense       | T                 |
| 642        | PD5151 | PV          | JAK2              | 10  | 104140270 | C        | T        | 287            | 1.1                        | 213          | 8.0                      | GBF1            | CCDS7533.1      | c.4997C>T   | p.A1666V       | missense       | T                 |
| 643        | PD5151 | PV          | JAK2              | 5   | 140182165 | G        | A        | 200            | 1.0                        | 193          | 7.8                      | PCDHA3          | CCDS34248.1     | c.1383G>A   | p.T461T        | silent         | T                 |
| 644        | PD5151 | PV          | JAK2              | 15  | 35275201  | A        | G        | 126            | 0.0                        | 68           | 7.4                      | ZNF770          | CCDS10042.1     | c.435T>C    | p.S145S        | silent         | T                 |
| 645        | PD5151 | PV          | JAK2              | X   | 37029191  | T        | C        | 234            | 0.4                        | 173          | 5.8                      | FAM47C          | CCDS35227.1     | c.2708T>C   | p.L903P        | missense       | T                 |
| 646        | PD5151 | PV          | JAK2              | 9   | 95064006  | A        | C        | 165            | 0.6                        | 125          | 5.6                      | NOL8            | CCDS47993.1     | c.3002T>G   | p.F1001C       | missense       | T                 |
| 647        | PD5151 | PV          | JAK2              | X   | 106882519 | T        | C        | 230            | 0.0                        | 247          | 5.3                      | PRPS1           | CCDS14529.1     | c.123-6T>C  | p.?            | splice         | T                 |
| 648        | PD5151 | PV          | JAK2              | 11  | 66192341  | G        | A        | 158            | 0.0                        | 211          | 5.2                      | NPAS4           | CCDS8138.1      | c.1980G>A   | p.E660E        | silent         | T                 |
| 649        | PD5151 | PV          | JAK2              | 10  | 123970851 | T        | A        | 208            | 0.0                        | 128          | 4.7                      | TACC2           | CCDS7626.1      | c.6911T>A   | p.M2304K       | missense       | T                 |
| 650        | PD5151 | PV          | JAK2              | 15  | 25425657  | G        | C        | 202            | 0.5                        | 435          | 3.7                      | SNORD115-6      | ENST00000363942 | Non-coding  | RNA            | T              |                   |
| 651        | PD5155 | PV          | JAK2              | 19  | 19349164  | G        | A        | 25             | 0.0                        | 72           | 44.4                     | NCAN            | CCDS12397.1     | c.3353G>A   | p.R1118H       | missense       | T                 |
| 652        | PD5155 | PV          | JAK2              | 16  | 28884923  | G        | A        | 11             | 0.0                        | 16           | 43.8                     | SH2B1           | ENST00000359285 | c.2053G>A   | p.G685S        | missense       | T                 |
| 653        | PD5155 | PV          | JAK2              | 15  | 42145608  | C        | T        | 10             | 0.0                        | 44           | 38.6                     | SPTBN5          | ENST00000320955 | c.10018G>A  | p.E3340K       | missense       | T                 |
| 654        | PD5155 | PV          | JAK2              | 1   | 152733326 | G        | A        | 52             | 1.9                        | 79           | 35.4                     | KPRP            | CCDS30862.1     | c.1262G>A   | p.R421H        | missense       | T                 |
| 655        | PD5155 | PV          | JAK2              | 10  | 104160201 | G        | A        | 11             | 0.0                        | 29           | 31.0                     | NFKB2           | CCDS41564.1     | c.1751G>A   | p.S584N        | missense       | T                 |
| 656        | PD5155 | PV          | JAK2              | 14  | 60591026  | A        | T        | 140            | 0.0                        | 236          | 29.7                     | C14orf135       | ENST00000406854 | c.2137A>T   | p.R713*        | nonsense       | T                 |
| 657        | PD5155 | PV          | JAK2              | 1   | 109714510 | G        | A        | 47             | 2.1                        | 53           | 28.3                     | KIAA1324        | CCDS794.1       | c.490G>A    | p.D164N        | missense       | T                 |
| 658        | PD5155 | PV          | JAK2              | 9   | 5073770   | G        | T        | 183            | 0.5                        | 191          | 27.8                     | JAK2            | CCDS6457.1      | c.1849G>T   | p.V617F        | missense       | T C               |
| 659        | PD5155 | PV          | JAK2              | 6   | 22570031  | G        | A        | 20             | 0.0                        | 34           | 23.5                     | HDGF1           | CCDS34347.1     | c.227G>A    | p.S76N         | missense       | T                 |
| 660        | PD5155 | PV          | JAK2              | 2   | 70486691  | A        | G        | 98             | 0.0                        | 264          | 21.6                     | PCYOX1          | CCDS1902.1      | c.312A>G    | p.K104K        | silent         | T                 |
| 661        | PD5155 | PV          | JAK2              | 1   | 210015695 | G        | A        | 68             | 0.0                        | 118          | 21.2                     | C1orf107        | CCDS1493.1      | c.1571G>A   | p.W524*        | nonsense       | T                 |
| 662        | PD5155 | PV          | JAK2              | 2   | 25463568  | A        | G        | 51             | 0.0                        | 88           | 19.3                     | DNMT3A          | CCDS33157.1     | c.2114T>C   | p.I705T        | missense       | T C               |
| 663        | PD5155 | PV          | JAK2              | 12  | 117768456 | G        | A        | 49             | 0.0                        | 53           | 18.9                     | NOS1            | CCDS41842.1     | c.419C>T    | p.P140L        | missense       | T                 |
| 664        | PD5155 | PV          | JAK2              | 12  | 110383092 | G        | C        | 13             | 0.0                        | 27           | 18.5                     | GIT2            | CCDS9138.1      | c.1704C>G   | p.S568S        | silent         | T                 |
| 665        | PD5155 | PV          | JAK2              | 5   | 160067574 | G        | T        | 129            | 0.0                        | 207          | 15.9                     | ATP10B          | CCDS43394.1     | c.894C>A    | p.N298K        | missense       | T                 |
| 666        | PD5155 | PV          | JAK2              | 12  | 39740311  | A        | G        | 87             | 0.0                        | 74           | 14.9                     | KIF21A          | ENST00000395670 | c.1674-5T>C | p.?            | splice         | T                 |
| 667        | PD5155 | PV          | JAK2              | 5   | 178987137 | A        | T        | 13             | 0.0                        | 34           | 14.7                     | RUFY1           | CCDS4445.2      | c.422A>T    | p.D141V        | missense       | T                 |
| 668        | PD5155 | PV          | JAK2              | 16  | 20376784  | C        | T        | 172            | 0.0                        | 135          | 13.3                     | PDILT           | CCDS10584.1     | c.1195G>A   | p.V399I        | missense       | T                 |
| 669        | PD5155 | PV          | JAK2              | 16  | 89764457  | C        | T        | 12             | 0.0                        | 30           | 13.3                     | SPATA2L         | CCDS10985.1     | c.560G>A    | p.R187H        | missense       | M                 |
| 670        | PD5155 | PV          | JAK2              | 17  | 48649313  | G        | A        | 259            | 0.0                        | 129          | 13.2                     | CACNA1G         | CCDS45730.1     | c.661G>A    | p.V221I        | missense       | T                 |
| 671        | PD5155 | PV          | JAK2              | 18  | 12115525  | A        | C        | 132            | 0.0                        | 152          | 9.9                      | ANKRD62         | ENST00000314074 | c.1190A>C   | p.E397A        | missense       | T                 |
| 672        | PD5155 | PV          | JAK2              | 9   | 33319053  | C        | T        | 52             | 0.0                        | 81           | 8.6                      | NFX1            | CCDS6538.1      | c.1834C>T   | p.R612W        | missense       | T                 |
| 673        | PD5155 | PV          | JAK2              | X   | 26212643  | G        | T        | 62             | 0.0                        | 49           | 8.2                      | MAGEB6          | CCDS14217.1     | c.680G>T    | p.R227I        | missense       | T                 |
| 674        | PD5155 | PV          | JAK2              | 7   | 13940470  | G        | A        | 87             | 0.0                        | 106          | 7.6                      | ETV1            | ENST00000405358 | c.1153-6C>T | p.?            | splice         | T                 |

| Variant No | PDID   | MPN Subtype | JAK2/MPL mutation | Chr | Position  | Ref base | Mut base | Germline reads | Germline allele burden (%) | Tumour reads | Tumour allele burden (%) | Gene     | CCDS            | DNA Change      | Protein Change | Type of Change   | Validation Method |
|------------|--------|-------------|-------------------|-----|-----------|----------|----------|----------------|----------------------------|--------------|--------------------------|----------|-----------------|-----------------|----------------|------------------|-------------------|
| 675        | PD5155 | PV          | JAK2              | 9   | 128064434 | C        | T        | 122            | 0.0                        | 155          | 7.1                      | GAPVD1   | CCDS35138.1     | c.358C>T        | p.L120F        | missense         | T                 |
| 676        | PD5155 | PV          | JAK2              | 3   | 39431020  | C        | G        | 132            | 0.0                        | 109          | 6.4                      | SLC25A38 | CCDS2685.1      | c.104C>G        | p.S35C         | missense         | T                 |
| 677        | PD5155 | PV          | JAK2              | 11  | 14316397  | C        | T        | 129            | 0.8                        | 172          | 6.4                      | RRAS2    | CCDS7814.1      | c.208G>A        | p.A70T         | missense         | T                 |
| 678        | PD5155 | PV          | JAK2              | 15  | 99670279  | G        | A        | 58             | 0.0                        | 169          | 5.9                      | SYNM     | ENST00000336292 | c.1711G>A       | p.V571M        | missense         | T                 |
| 679        | PD5155 | PV          | JAK2              | 6   | 56485273  | T        | A        | 92             | 0.0                        | 141          | 5.7                      | DST      | CCDS4959.1      | c.3559A>T       | p.I1187L       | missense         | T                 |
| 680        | PD5155 | PV          | JAK2              | 11  | 108236087 | G        | A        | 66             | 0.0                        | 144          | 5.6                      | ATM      | CCDS31669.1     | c.9023G>A       | p.R3008H       | missense         | T                 |
| 681        | PD5155 | PV          | JAK2              | 1   | 158631121 | C        | T        | 166            | 0.0                        | 209          | 4.8                      | SPTA1    | CCDS41423.1     | c.2543G>A       | p.R848H        | missense         | T                 |
| 682        | PD5155 | PV          | JAK2              | 5   | 16091158  | T        | A        | 69             | 0.0                        | 132          | 4.6                      | MARCH11  | CCDS47192.1     | c.726A>T        | p.K242N        | missense         | T                 |
| 683        | PD5158 | PV          | JAK2              | 2   | 192250642 | A        | G        | 364            | 8.0                        | 443          | 46.1                     | MYO1B    | CCDS46477.1     | c.1386A>G       | p.E462E        | silent           | T                 |
| 684        | PD5158 | PV          | JAK2              | 11  | 26581277  | G        | T        | 236            | 5.1                        | 222          | 43.7                     | ANO3     | CCDS31447.1     | c.1398G>T       | p.L466F        | missense         | T                 |
| 685        | PD5158 | PV          | JAK2              | 4   | 106196702 | _        | insT     | 148            | 13.6                       | 311          | 41.8                     | TET2     | CCDS47120.1     | c.5035_5036insT | p.Y1679fs*8    | frameshift       | T C               |
| 686        | PD5158 | PV          | JAK2              | 6   | 132910335 | G        | C        | 80             | 2.5                        | 68           | 33.8                     | TAAR5    | CCDS5156.1      | c.491C>G        | p.A164G        | missense         | T                 |
| 687        | PD5158 | PV          | JAK2              | 8   | 72975724  | T        | A        | 74             | 1.4                        | 86           | 19.8                     | TRPA1    | CCDS34908.1     | c.635A>T        | p.E212V        | missense         | T                 |
| 688        | PD5158 | PV          | JAK2              | 9   | 5073770   | G        | T        | 158            | 3.8                        | 188          | 18.6                     | JAK2     | CCDS6457.1      | c.1849G>T       | p.V617F        | missense         | T                 |
| 689        | PD5158 | PV          | JAK2              | 7   | 120906394 | C        | T        | 296            | 3.4                        | 146          | 15.8                     | C7orf58  | CCDS34739.1     | c.2424C>T       | p.N808N        | silent           | T                 |
| 690        | PD5158 | PV          | JAK2              | 7   | 139164929 | G        | T        | 60             | 1.7                        | 56           | 14.3                     | KLRG2    | CCDS5854.1      | c.822C>A        | p.V274V        | silent           | T                 |
| 691        | PD5158 | PV          | JAK2              | 2   | 11741065  | C        | G        | 104            | 3.9                        | 153          | 13.1                     | GREB1    | CCDS42655.1     | c.2473C>G       | p.Q825E        | missense         | T                 |
| 692        | PD5158 | PV          | JAK2              | 12  | 9847365   | C        | T        | 217            | 4.2                        | 273          | 11.4                     | CLEC2D   | CCDS31741.1     | c.553C>T        | p.P185S        | missense         | T                 |
| 693        | PD5158 | PV          | JAK2              | 14  | 23313685  | G        | A        | 244            | 1.6                        | 237          | 7.6                      | MMP14    | CCDS9577.1      | c.1117G>A       | p.E373K        | missense         | T                 |
| 694        | PD5158 | PV          | JAK2              | 5   | 31526394  | G        | C        | 75             | 1.3                        | 128          | 6.3                      | RNASEN   | CCDS47195.1     | c.646C>G        | p.P216A        | missense         | T                 |
| 695        | PD5161 | PV          | JAK2              | 9   | 5073770   | G        | T        | 137            | 8.8                        | 129          | 62.8                     | JAK2     | CCDS6457.1      | c.1849G>T       | p.V617F        | missense         | M                 |
| 696        | PD5161 | PV          | JAK2              | 4   | 8589022   | C        | T        | 43             | 0.0                        | 57           | 36.8                     | GPR78    | CCDS3403.1      | c.1024C>T       | p.R342C        | missense         | M                 |
| 697        | PD5161 | PV          | JAK2              | 9   | 99246896  | A        | T        | 80             | 6.3                        | 72           | 33.3                     | HABP4    | CCDS6719.1      | c.980A>T        | p.K327M        | missense         | M                 |
| 698        | PD5161 | PV          | JAK2              | 1   | 158261175 | C        | T        | 249            | 1.6                        | 91           | 30.8                     | CD1C     | CCDS1175.1      | c.313C>T        | p.Q105*        | nonsense         | M                 |
| 699        | PD5161 | PV          | JAK2              | 15  | 7890833   | T        | C        | 92             | 0.0                        | 114          | 30.7                     | SNUPN    | CCDS10281.1     | c.949A>G        | p.K317E        | missense         | M                 |
| 700        | PD5161 | PV          | JAK2              | 10  | 104572845 | T        | C        | 48             | 0.0                        | 69           | 30.4                     | C10orf26 | CCDS44473.1     | c.849T>C        | p.H283H        | silent           | M                 |
| 701        | PD5161 | PV          | JAK2              | 2   | 26653653  | G        | A        | 280            | 0.0                        | 265          | 30.2                     | C2orf39  | CCDS1723.1      | c.679-1G>A      | p.?            | essential splice | M                 |
| 702        | PD5161 | PV          | JAK2              | 6   | 123319065 | G        | A        | 121            | 0.8                        | 94           | 29.8                     | CLVS2    | CCDS34525.1     | c.143G>A        | p.R48H         | missense         | M                 |
| 703        | PD5161 | PV          | JAK2              | 17  | 57737916  | G        | A        | 287            | 0.7                        | 300          | 29.3                     | CLTC     | CCDS32696.1     | c.1134G>A       | p.S378S        | silent           | M                 |
| 704        | PD5161 | PV          | JAK2              | 16  | 53358543  | A        | C        | 152            | 0.0                        | 192          | 23.4                     | CHD9     | CCDS45485.1     | c.8382A>C       | p.P2794P       | silent           | M                 |
| 705        | PD5163 | PV          | JAK2              | 12  | 57111539  | G        | A        | 21             | 0.0                        | 28           | 21.4                     | NACA2    | CCDS44925.1     | c.3775C>T       | p.P1259S       | missense         | M                 |
| 706        | PD5163 | PV          | JAK2              | 9   | 5073770   | G        | T        | 135            | 0.7                        | 147          | 6.8                      | JAK2     | CCDS6457.1      | c.1849G>T       | p.V617F        | missense         | C                 |
| 707        | PD5165 | PV          | JAK2              | 9   | 5073770   | G        | T        | 153            | 2.6                        | 93           | 49.5                     | JAK2     | CCDS6457.1      | c.1849G>T       | p.V617F        | missense         | T                 |
| 708        | PD5165 | PV          | JAK2              | 4   | 31144181  | C        | T        | 295            | 0.7                        | 97           | 33.0                     | PCDH7    | CCDS43220.1     | c.3313C>T       | p.P1105S       | missense         | T                 |
| 709        | PD5165 | PV          | JAK2              | 1   | 90478737  | G        | A        | 83             | 4.8                        | 80           | 27.5                     | ZNF326   | CCDS727.1       | c.867G>A        | p.R289R        | silent           | T                 |
| 710        | PD5165 | PV          | JAK2              | 19  | 8841739   | C        | T        | 78             | 0.0                        | 56           | 26.8                     | OR2Z1    | CCDS32895.1     | c.349C>T        | p.L117F        | missense         | T                 |
| 711        | PD5165 | PV          | JAK2              | 2   | 232327250 | G        | C        | 49             | 2.0                        | 65           | 24.6                     | NCL      | ENST00000392033 | c.170C>G        | p.T57S         | missense         | T                 |
| 712        | PD5165 | PV          | JAK2              | 16  | 2296890   | G        | A        | 23             | 4.4                        | 64           | 20.3                     | DCI      | CCDS10464.1     | c.264C>T        | p.D88D         | silent           | T                 |
| 713        | PD5165 | PV          | JAK2              | 19  | 57325206  | G        | A        | 114            | 2.6                        | 65           | 18.5                     | PEG3AS   | CCDS12948.1     | c.4604C>T       | p.P1535L       | missense         | T                 |
| 714        | PD5165 | PV          | JAK2              | 19  | 16957798  | G        | A        | 51             | 0.0                        | 40           | 12.5                     | SIN3B    | CCDS32946.1     | c.600G>A        | p.T200T        | silent           | T                 |
| 715        | PD5165 | PV          | JAK2              | 3   | 176767859 | C        | T        | 188            | 0.0                        | 125          | 9.6                      | TBL1XR1  | CCDS46961.1     | c.628G>A        | p.V210I        | missense         | T                 |
| 716        | PD5182 | PV          | JAK2              | 2   | 25458575  | C        | T        | 58             | 1.7                        | 104          | 6.7                      | DNMT3A   | CCDS33157.1     | c.2597+1G>A     | p.?            | essential splice | T C               |
| 717        | PD5182 | PV          | JAK2              | 9   | 5073770   | G        | T        | 156            | 0.0                        | 223          | 3.6                      | JAK2     | CCDS6457.1      | c.1849G>T       | p.V617F        | missense         | T C               |
| 718        | PD5192 | PV          | JAK2              | 6   | 89975484  | C        | G        | 121            | 5.0                        | 151          | 21.2                     | GABRR2   | CCDS5020.2      | c.812G>C        | p.G271A        | missense         | T                 |
| 719        | PD5192 | PV          | JAK2              | 9   | 5073770   | G        | T        | 159            | 3.8                        | 140          | 20.0                     | JAK2     | CCDS6457.1      | c.1849G>T       | p.V617F        | missense         | T                 |
| 720        | PD5847 | PV          | JAK2              | 9   | 5073770   | G        | T        | 254            | 14.6                       | 234          | 47.0                     | JAK2     | CCDS6457.1      | c.1849G>T       | p.V617F        | missense         | T C               |
| 721        | PD5847 | PV          | JAK2              | 4   | 106155938 | _        | insT     | 176            | 14.8                       | 78           | 25.6                     | TET2     | CCDS47120.1     | c.839_840insT   | p.N281fs*0     | frameshift       | T                 |
| 722        | PD5847 | PV          | JAK2              | 5   | 74892823  | T        | C        | 390            | 8.0                        | 290          | 20.7                     | POLK     | CCDS4030.1      | c.2305T>C       | p.C769R        | missense         | T C               |
| 723        | PD5847 | PV          | JAK2              | 3   | 171320961 | C        | T        | 54             | 5.6                        | 110          | 18.2                     | PLD1     | CCDS3216.1      | c.3132G>A       | p.L1044L       | silent           | T C               |
| 724        | PD5847 | PV          | JAK2              | 11  | 64891979  | G        | T        | 88             | 3.4                        | 150          | 12.7                     | MRPL49   | CCDS8096.1      | c.84G>T         | p.Q28H         | missense         | T C               |
| 725        | PD5847 | PV          | JAK2              | 2   | 25464534  | T        | A        | 11             | 0.0                        | 25           | 12.0                     | DNMT3A   | CCDS33157.1     | c.1979A>T       | p.Y660F        | missense         | T C               |
| 726        | PD6548 | ET          | JAK2              | 4   | 106157755 | C        | T        | 36             | 5.6                        | 34           | 17.7                     | TET2     | CCDS47120.1     | c.2656C>T       | p.Q886*        | nonsense         | T                 |



| Variant No | PDID   | MPN Subtype | JAK2/MPL mutation | Chr | Position  | Ref base | Mut base          | Germline reads | Germline allele burden (%) | Tumour reads | Tumour allele burden (%) | Gene            | CCDS            | DNA Change          | Protein Change | Type of Change   | Validation Method |
|------------|--------|-------------|-------------------|-----|-----------|----------|-------------------|----------------|----------------------------|--------------|--------------------------|-----------------|-----------------|---------------------|----------------|------------------|-------------------|
| 727        | PD6548 | ET          | JAK2              | 9   | 5073770   | G        | T                 | 111            | 5.4                        | 107          | 16.8                     | JAK2            | CCDS6457.1      | c.1849G>T           | p.V617F        | missense         | T                 |
| 728        | PD6548 | ET          | JAK2              | 5   | 148748248 | C        | G                 | 19             | 0.0                        | 44           | 11.4                     | PCYOX1L         | CCDS4296.1      | Non-coding          | r.1578c>g      | UTR              | M                 |
| 729        | PD6549 | ET          | unmutated         | 19  | 13054627  | _        | insTTGTC          | 16             | 0.0                        | 13           | 61.5                     | CALR            | CCDS12288.1     | c.1154_1155insTTGTC | p.K385fs*47    | frameshift       | M T C             |
| 730        | PD6549 | ET          | unmutated         | 7   | 150498783 | G        | A                 | 12             | 0.0                        | 12           | 58.3                     | TMEM176A        | CCDS5909.1      | c.145G>A            | p.G49S         | missense         | T                 |
| 731        | PD6549 | ET          | unmutated         | 5   | 21783610  | A        | C                 | 143            | 0.0                        | 188          | 52.1                     | CDH12           | CCDS3890.1      | c.1257-7T>G         | p.?            | splice           | T                 |
| 732        | PD6549 | ET          | unmutated         | 12  | 97328812  | A        | G                 | 172            | 0.6                        | 197          | 48.7                     | NEDD1           | CCDS44955.1     | c.569A>G            | p.D190G        | missense         | T                 |
| 733        | PD6549 | ET          | unmutated         | 15  | 101816741 | C        | T                 | 109            | 0.9                        | 118          | 47.5                     | ENSG00000131871 | ENST00000398226 | c.211+5G>A          | p.?            | essential splice | T                 |
| 734        | PD6549 | ET          | unmutated         | 7   | 143141030 | G        | A                 | 143            | 0.0                        | 174          | 47.1                     | TAS2R60         | CCDS5885.1      | c.485G>A            | p.G162D        | missense         | T                 |
| 735        | PD6549 | ET          | unmutated         | 1   | 20671941  | C        | T                 | 52             | 0.0                        | 45           | 44.4                     | VWA5B1          | CCDS44078.1     | c.2627-8C>T         | p.?            | splice           | T                 |
| 736        | PD6549 | ET          | unmutated         | 14  | 77880351  | G        | A                 | 17             | 0.0                        | 37           | 40.5                     | C14orf148       | CCDS45142.1     | c.275C>T            | p.A92V         | missense         | T                 |
| 737        | PD6549 | ET          | unmutated         | 9   | 127216794 | G        | A                 | 17             | 0.0                        | 18           | 38.9                     | GPR144          | CCDS48016.1     | c.1110G>A           | p.S370S        | silent           | T                 |
| 738        | PD6549 | ET          | unmutated         | 2   | 202939644 | T        | C                 | 104            | 0.0                        | 134          | 38.8                     | ENSG00000182329 | ENST00000409515 | c.115T>C            | p.Y39H         | missense         | T                 |
| 739        | PD6549 | ET          | unmutated         | 17  | 26920087  | G        | A                 | 81             | 1.2                        | 86           | 38.4                     | SPAG5           | CCDS32594.1     | c.178-3C>T          | p.?            | splice           | T                 |
| 740        | PD6549 | ET          | unmutated         | 8   | 52320920  | C        | T                 | 133            | 0.0                        | 148          | 35.8                     | PXDNL           | CCDS47855.1     | c.3264G>A           | p.P1088P       | silent           | T                 |
| 741        | PD6561 | ET          | unmutated         | 19  | 3293325   | A        | T                 | 54             | 0.0                        | 64           | 45.3                     | CELF5           | CCDS12106.1     | c.1339A>T           | p.S447C        | missense         | T C               |
| 742        | PD6561 | ET          | unmutated         | 7   | 151135153 | C        | T                 | 49             | 0.0                        | 68           | 44.1                     | CRYGN           | CCDS5926.1      | c.199G>A            | p.G67S         | missense         | T C               |
| 743        | PD6561 | ET          | unmutated         | 18  | 8783965   | G        | A                 | 191            | 0.0                        | 215          | 43.3                     | KIAA0802        | CCDS11841.1     | c.855G>A            | p.A285A        | silent           | T C               |
| 744        | PD6561 | ET          | unmutated         | 1   | 66833673  | _        | delG              | 82             | 0.0                        | 95           | 30.5                     | PDE4B           | CCDS632.1       | c.1587delG          | p.K530fs*4     | frameshift       | T C               |
| 745        | PD6561 | ET          | unmutated         | 11  | 55433006  | G        | A                 | 97             | 0.0                        | 118          | 17.0                     | OR4C6           | CCDS31506.1     | c.364G>A            | p.V122M        | missense         | T C               |
| 746        | PD6561 | ET          | unmutated         | 3   | 141891234 | T        | C                 | 112            | 0.0                        | 111          | 15.3                     | GK5             | ENST00000392993 | c.1208A>G           | p.Y403C        | missense         | T C               |
| 747        | PD6561 | ET          | unmutated         | 19  | 13054627  | _        | insTTGTC          | 17             | 0.0                        | 14           | 21.4                     | CALR            | CCDS12288.1     | c.1154_1155insTTGTC | p.K385fs*47    | frameshift       | M T C             |
| 748        | PD6563 | ET          | unmutated         | 19  | 13054655  | _        | delGCAG<<42>AGGAG | 21             | 9.5                        | 17           | 35.3                     | CALR            | CCDS12288.1     | c.1092_1143del52    | p.L367fs*46    | frameshift       | M C               |
| 749        | PD6563 | ET          | unmutated         | 12  | 22065906  | C        | T                 | 83             | 1.2                        | 108          | 45.4                     | ABCC9           | CCDS8693.1      | c.911G>A            | p.R304H        | missense         | T C               |
| 750        | PD6563 | ET          | unmutated         | 17  | 47246181  | G        | A                 | 36             | 0.0                        | 36           | 44.4                     | B4GALNT2        | CCDS11544.1     | c.1414G>A           | p.V472M        | missense         | T C               |
| 751        | PD6563 | ET          | unmutated         | 6   | 144508545 | G        | A                 | 27             | 0.0                        | 16           | 43.8                     | STX11           | CCDS5205.1      | c.781G>A            | p.A261T        | missense         | M C               |
| 752        | PD6563 | ET          | unmutated         | 6   | 43591675  | A        | G                 | 243            | 1.2                        | 228          | 39.5                     | GTPBP2          | CCDS4903.1      | c.1231T>C           | p.F411L        | missense         | T C               |
| 753        | PD6563 | ET          | unmutated         | 12  | 123061513 | G        | A                 | 150            | 0.0                        | 283          | 36.4                     | KNTC1           | CCDS45002.1     | c.2658G>A           | p.A886A        | silent           | T C               |
| 754        | PD6563 | ET          | unmutated         | 10  | 410346    | G        | A                 | 106            | 0.9                        | 89           | 34.8                     | DIP2C           | CCDS7054.1      | c.2445C>T           | p.A815A        | silent           | M C               |
| 755        | PD6563 | ET          | unmutated         | 11  | 128851419 | C        | T                 | 96             | 1.0                        | 106          | 33.0                     | ARHGAP32        | CCDS44769.1     | c.1630G>A           | p.A544T        | missense         | T C               |
| 756        | PD6563 | ET          | unmutated         | 21  | 34707883  | A        | G                 | 109            | 0.0                        | 123          | 28.5                     | IFNAR1          | CCDS13624.1     | c.130A>G            | p.N44D         | missense         | T C               |
| 757        | PD6566 | ET          | unmutated         | 19  | 13054627  | _        | insTTGTC          | 4              | 0.0                        | 16           | 37.5                     | CALR            | CCDS12288.1     | c.1154_1155insTTGTC | p.K385fs*47    | frameshift       | M C               |
| 758        | PD6566 | ET          | unmutated         | 4   | 141543733 | C        | T                 | 63             | 6.4                        | 59           | 55.9                     | TBC1D9          | CCDS47136.1     | c.3417G>A           | p.S1139S       | silent           | T                 |
| 759        | PD6566 | ET          | unmutated         | 15  | 26825472  | C        | T                 | 49             | 0.0                        | 54           | 40.7                     | GABRB3          | CCDS10019.1     | c.676G>A            | p.A226T        | missense         | T                 |
| 760        | PD6568 | PV          | JAK2              | 9   | 5073770   | G        | T                 | 158            | 0.0                        | 145          | 31.7                     | JAK2            | CCDS6457.1      | c.1849G>T           | p.V617F        | missense         | T                 |
| 761        | PD6568 | PV          | JAK2              | 2   | 27844314  | C        | T                 | 61             | 0.0                        | 76           | 31.6                     | ZNF512          | CCDS1758.1      | c.1690C>T           | p.R564*        | nonsense         | T                 |
| 762        | PD6568 | PV          | JAK2              | 1   | 151508754 | G        | A                 | 34             | 2.9                        | 128          | 20.3                     | CGN             | CCDS999.1       | c.3239G>A           | p.R1080Q       | missense         | T                 |
| 763        | PD6568 | PV          | JAK2              | 2   | 71896831  | C        | T                 | 138            | 0.0                        | 135          | 19.3                     | DYSF            | CCDS46328.1     | c.5739C>T           | p.P1913P       | silent           | T                 |
| 764        | PD6568 | PV          | JAK2              | 19  | 16035618  | C        | T                 | 51             | 0.0                        | 96           | 16.7                     | ENSG00000171903 | CCDS12337.1     | c.600G>A            | p.L200L        | silent           | T                 |
| 765        | PD6568 | PV          | JAK2              | 1   | 179086534 | _        | delA              | 84             | 0.0                        | 142          | 14.8                     | ABL2            | CCDS41441.1     | c.1233delT          | p.P412fs*51    | frameshift       | T                 |
| 766        | PD6568 | PV          | JAK2              | 14  | 20443698  | T        | A                 | 142            | 0.0                        | 113          | 14.2                     | OR4K15          | CCDS32026.1     | c.21T>A             | p.D7E          | missense         | T                 |
| 767        | PD6568 | PV          | JAK2              | 12  | 54686911  | _        | delG              | 34             | 0.0                        | 105          | 10.5                     | NFE2            | CCDS8876.1      | c.369delC           | p.L124fs*0     | frameshift       | T                 |
| 768        | PD6568 | PV          | JAK2              | 1   | 229750071 | C        | T                 | 152            | 0.0                        | 85           | 9.4                      | TAF5L           | ENST00000366674 | c.159G>A            | p.S53S         | silent           | T                 |
| 769        | PD6568 | PV          | JAK2              | 9   | 139350516 | G        | A                 | 40             | 0.0                        | 75           | 8.0                      | SEC16A          | ENST00000313050 | c.5119C>T           | p.R1707W       | missense         | T                 |
| 770        | PD6568 | PV          | JAK2              | 9   | 91940839  | _        | insT              | 134            | 0.0                        | 111          | 7.2                      | SECISBP2        | CCDS6683.1      | c.460_461insT       | p.Y154fs*2     | frameshift       | T                 |
| 771        | PD6568 | PV          | JAK2              | 2   | 179436414 | T        | C                 | 157            | 0.0                        | 261          | 6.1                      | TTN             | ENST00000356127 | c.66735A>G          | p.P22245P      | silent           | T                 |
| 772        | PD6568 | PV          | JAK2              | 11  | 71331462  | C        | T                 | 92             | 0.0                        | 318          | 4.7                      | OR7E87P         | ENST00000454336 | c.248C>T            | p.T83I         | missense         | T                 |
| 773        | PD6573 | ET          | unmutated         | 19  | 13054627  | _        | insTTGTC          | 3              | 33.3                       | 20           | 4.0                      | CALR            | CCDS12288.1     | c.1154_1155insTTGTC | p.K385fs*47    | frameshift       | M T C             |
| 774        | PD6573 | ET          | unmutated         | X   | 70461098  | T        | C                 | 38             | 2.6                        | 34           | 32.4                     | ZMYM3           | CCDS14409.1     | c.3899A>G           | p.Y1300C       | missense         | T                 |
| 775        | PD6573 | ET          | unmutated         | 1   | 16455924  | C        | A                 | 37             | 0.0                        | 69           | 30.4                     | EPHA2           | CCDS169.1       | c.2825+5G>T         | p.?            | essential splice | T                 |
| 776        | PD6573 | ET          | unmutated         | 4   | 7398081   | C        | T                 | 89             | 3.4                        | 142          | 23.9                     | SORCS2          | CCDS47008.1     | c.547C>T            | p.R183W        | missense         | T                 |
| 777        | PD6573 | ET          | unmutated         | 2   | 32475594  | G        | T                 | 38             | 0.0                        | 87           | 21.8                     | NLRC4           | CCDS33174.1     | c.1339C>A           | p.Q447K        | missense         | T                 |
| 778        | PD6573 | ET          | unmutated         | 11  | 128840264 | C        | T                 | 33             | 0.0                        | 91           | 7.7                      | ARHGAP32        | CCDS44769.1     | c.4802G>A           | p.R1601Q       | missense         | T                 |

| Variant No | PDID   | MPN Subtype | JAK2/MPL mutation | Chr | Position  | Ref base | Mut base | Germline reads | Germline allele burden (%) | Tumour reads | Tumour allele burden (%) | Gene            | CCDS            | DNA Change          | Protein Change | Type of Change   | Validation Method |
|------------|--------|-------------|-------------------|-----|-----------|----------|----------|----------------|----------------------------|--------------|--------------------------|-----------------|-----------------|---------------------|----------------|------------------|-------------------|
| 779        | PD6573 | ET          | unmutated         | 16  | 89016802  | A        | T        | 99             | 2.0                        | 222          | 5.9                      | ENSG00000205018 | ENST00000378347 | c.276A>T            | p.S92S         | silent           | T                 |
| 780        | PD6586 | ET          | JAK2              | 9   | 5073770   | G        | T        | 114            | 0.0                        | 177          | 9.6                      | JAK2            | CCDS6457.1      | c.1849G>T           | p.V617F        | missense         | T                 |
| 781        | PD6586 | ET          | JAK2              | 4   | 96761711  | C        | T        | 69             | 0.0                        | 130          | 8.5                      | PDHA2           | CCDS3644.1      | c.410C>T            | p.T137M        | missense         | T                 |
| 782        | PD6591 | ET          | JAK2              | 9   | 5073770   | G        | T        | 114            | 3.5                        | 42           | 14.3                     | JAK2            | CCDS6457.1      | c.1849G>T           | p.V617F        | missense         | M                 |
| 783        | PD6591 | ET          | JAK2              | 14  | 86089606  | G        | A        | 128            | 3.1                        | 269          | 11.5                     | FLRT2           | CCDS9877.1      | c.1748G>A           | p.R583Q        | missense         | M                 |
| 784        | PD6593 | ET          | MPL               | 1   | 43815009  | G        | T        | 51             | 0.0                        | 125          | 4.0                      | MPL             | CCDS483.1       | c.1544G>T           | p.W515L        | missense         | T                 |
| 785        | PD6594 | ET          | JAK2              | 4   | 122825591 | G        | T        | 85             | 2.4                        | 68           | 33.8                     | TRPC3           | CCDS47130.1     | c.2139C>A           | p.H713Q        | missense         | T                 |
| 786        | PD6594 | ET          | JAK2              | 8   | 80965612  | A        | C        | 169            | 4.1                        | 130          | 26.9                     | TPD52           | CCDS34912.1     | c.309T>G            | p.H103Q        | missense         | T                 |
| 787        | PD6594 | ET          | JAK2              | 16  | 12371903  | G        | A        | 179            | 1.7                        | 155          | 25.2                     | SNX29           | CCDS45416.1     | c.627+10G>A         | p.?            | splice           | T                 |
| 788        | PD6594 | ET          | JAK2              | 13  | 53418723  | G        | A        | 31             | 0.0                        | 65           | 12.3                     | PCDH8           | CCDS9438.1      | c.3185C>T           | p.P1062L       | missense         | T                 |
| 789        | PD6594 | ET          | JAK2              | 17  | 26108178  | G        | A        | 93             | 0.0                        | 52           | 9.6                      | NOS2            | CCDS11223.1     | c.748C>T            | p.R250W        | missense         | T                 |
| 790        | PD6594 | ET          | JAK2              | 11  | 107948968 | G        | T        | 500            | 0.0                        | 273          | 8.8                      | CUL5            | CCDS31668.1     | c.1178+1G>T         | p.?            | essential splice | T                 |
| 791        | PD6594 | ET          | JAK2              | 16  | 5134829   | C        | T        | 67             | 0.0                        | 73           | 8.2                      | ALG1            | CCDS10528.1     | c.1342C>T           | p.R448*        | nonsense         | T                 |
| 792        | PD6594 | ET          | JAK2              | 18  | 3193959   | G        | C        | 80             | 1.3                        | 75           | 8.0                      | MYOM1           | CCDS45824.1     | c.291-3C>G          | p.?            | splice           | T                 |
| 793        | PD6594 | ET          | JAK2              | 1   | 172062005 | T        | C        | 215            | 0.0                        | 146          | 7.5                      | DNM3            | CCDS44276.1     | c.1535T>C           | p.V512A        | missense         | T                 |
| 794        | PD6594 | ET          | JAK2              | 9   | 5073770   | G        | T        | 183            | 0.5                        | 120          | 4.2                      | JAK2            | CCDS6457.1      | c.1849G>T           | p.V617F        | missense         | T                 |
| 795        | PD6597 | ET          | unmutated         | 19  | 13054627  | _        | insTTGTC | 2              | 0.0                        | 20           | 45.0                     | CALR            | CCDS12288.1     | c.1154_1155insTTGTC | p.K385fs*47    | frameshift       | M T C             |
| 796        | PD6597 | ET          | unmutated         | 11  | 57077693  | A        | T        | 15             | 0.0                        | 102          | 51.0                     | TNKS1BP1        | CCDS7951.1      | c.2492T>A           | p.L831H        | missense         | T                 |
| 797        | PD6597 | ET          | unmutated         | 6   | 149916245 | T        | G        | 75             | 5.3                        | 150          | 44.7                     | KATNA1          | CCDS5217.1      | c.1403A>C           | p.K468T        | missense         | T                 |
| 798        | PD6597 | ET          | unmutated         | 6   | 56473996  | T        | C        | 500            | 2.8                        | 500          | 41.6                     | DST             | CCDS47444.1     | c.3819A>G           | p.P1273P       | silent           | T                 |
| 799        | PD6597 | ET          | unmutated         | 12  | 31269398  | G        | A        | 78             | 3.9                        | 265          | 12.5                     | ENSG00000177359 | ENST00000266524 | c.3900C>T           | p.T1300T       | silent           | T                 |
| 800        | PD6599 | ET          | JAK2              | 19  | 24115392  | A        | G        | 67             | 6.0                        | 61           | 44.3                     | ZNF726          | ENST00000322487 | c.474A>G            | p.I158M        | missense         | M                 |
| 801        | PD6599 | ET          | JAK2              | 7   | 43496045  | C        | T        | 29             | 3.5                        | 46           | 19.6                     | HECW1           | CCDS5469.2      | c.2650C>T           | p.R884W        | missense         | M                 |
| 802        | PD6599 | ET          | JAK2              | 7   | 103131214 | C        | A        | 70             | 0.0                        | 91           | 9.9                      | RELN            | CCDS47680.1     | c.9506G>T           | p.C3169F       | missense         | M                 |
| 803        | PD6599 | ET          | JAK2              | 17  | 76046069  | T        | C        | 25             | 0.0                        | 64           | 9.4                      | ENSG00000078687 | CCDS45799.1     | c.926T>C            | p.L309P        | missense         | M                 |
| 804        | PD6599 | ET          | JAK2              | 9   | 5073770   | G        | T        | 90             | 0.0                        | 206          | 1.5                      | JAK2            | CCDS6457.1      | c.1849G>T           | p.V617F        | missense         | T                 |
| 805        | PD6600 | ET          | JAK2              | 9   | 5073770   | G        | T        | 121            | 2.5                        | 137          | 29.9                     | JAK2            | CCDS6457.1      | c.1849G>T           | p.V617F        | missense         | M                 |
| 806        | PD6602 | ET          | unmutated         | 14  | 95570029  | C        | T        | 89             | 1.1                        | 154          | 22.1                     | DICER1          | CCDS9931.1      | c.3704G>A           | p.C1235Y       | missense         | T                 |
| 807        | PD6602 | ET          | unmutated         | 16  | 31123561  | G        | C        | 38             | 0.0                        | 19           | 21.1                     | BCKDK           | CCDS10705.1     | c.1214G>C           | p.G405A        | missense         | T                 |
| 808        | PD6602 | ET          | unmutated         | 1   | 91406390  | A        | T        | 165            | 4.9                        | 255          | 20.0                     | ZNF644          | CCDS731.1       | c.521T>A            | p.V174D        | missense         | T                 |
| 809        | PD6602 | ET          | unmutated         | 5   | 68661333  | G        | A        | 119            | 0.8                        | 158          | 17.1                     | TAF9            | CCDS4002.1      | c.232C>T            | p.R78C         | missense         | T                 |
| 810        | PD6602 | ET          | unmutated         | 5   | 149277971 | T        | C        | 119            | 7.6                        | 137          | 16.1                     | PDE6A           | CCDS4299.1      | c.1362A>G           | p.V454V        | silent           | T                 |
| 811        | PD6602 | ET          | unmutated         | 12  | 14019063  | C        | T        | 64             | 1.6                        | 50           | 10.0                     | GRIN2B          | CCDS8662.1      | c.80G>A             | p.R27H         | missense         | T                 |
| 812        | PD6603 | ET          | JAK2              | 9   | 5073770   | G        | T        | 197            | 0.0                        | 220          | 9.1                      | JAK2            | CCDS6457.1      | c.1849G>T           | p.V617F        | missense         | T                 |
| 813        | PD6603 | ET          | JAK2              | 10  | 43293968  | G        | A        | 139            | 0.0                        | 155          | 6.5                      | BMS1            | CCDS7199.1      | c.2142G>A           | p.G714G        | silent           | T                 |
| 814        | PD6603 | ET          | JAK2              | 1   | 36474509  | A        | C        | 134            | 0.0                        | 147          | 5.4                      | EIF2C3          | CCDS399.1       | c.893A>C            | p.Q298P        | missense         | T                 |
| 815        | PD6603 | ET          | JAK2              | 3   | 128292319 | _        | delTC    | 90             | 0.0                        | 102          | 4.9                      | C3orf27         | CCDS3050.1      | c.253_254delGA      | p.D85fs*0      | frameshift       | T                 |
| 816        | PD6619 | ET          | JAK2              | 9   | 139751004 | C        | A        | 18             | 0.0                        | 52           | 42.3                     | MAMDC4          | ENST00000392881 | c.1946C>A           | p.T649K        | missense         | T                 |
| 817        | PD6619 | ET          | JAK2              | 1   | 16456031  | G        | A        | 47             | 0.0                        | 19           | 42.1                     | EPHA2           | CCDS169.1       | c.2723C>T           | p.T908M        | missense         | T                 |
| 818        | PD6619 | ET          | JAK2              | 1   | 53377235  | T        | C        | 82             | 0.0                        | 53           | 41.5                     | ECHDC2          | CCDS571.1       | c.277+3A>G          | p.?            | splice           | T                 |
| 819        | PD6619 | ET          | JAK2              | 4   | 140280987 | A        | T        | 64             | 0.0                        | 75           | 40.0                     | NAA15           | CCDS43270.1     | c.1348A>T           | p.K450*        | nonsense         | T                 |
| 820        | PD6619 | ET          | JAK2              | 18  | 74536368  | C        | T        | 43             | 2.3                        | 95           | 37.9                     | ZNF236          | CCDS42447.1     | c.49+6C>T           | p.?            | splice           | T                 |
| 821        | PD6619 | ET          | JAK2              | 9   | 5073770   | G        | T        | 139            | 0.7                        | 162          | 37.0                     | JAK2            | CCDS6457.1      | c.1849G>T           | p.V617F        | missense         | T                 |
| 822        | PD6619 | ET          | JAK2              | 18  | 74536367  | G        | A        | 44             | 2.3                        | 96           | 36.5                     | ZNF236          | CCDS42447.1     | c.49+5G>A           | p.?            | essential splice | T                 |
| 823        | PD6619 | ET          | JAK2              | 17  | 17062183  | A        | G        | 33             | 0.0                        | 72           | 34.7                     | MPRIIP          | CCDS42268.1     | c.1913A>G           | p.Q638R        | missense         | T                 |
| 824        | PD6619 | ET          | JAK2              | 1   | 204518404 | G        | A        | 98             | 0.0                        | 123          | 34.2                     | MDM4            | CCDS1447.1      | c.1067G>A           | p.G356E        | missense         | T                 |
| 825        | PD6619 | ET          | JAK2              | 20  | 31022675  | _        | delC     | 30             | 0.0                        | 48           | 33.3                     | ASXL1           | CCDS13201.1     | c.2160delC          | p.L721fs*4     | frameshift       | T                 |
| 826        | PD6619 | ET          | JAK2              | 1   | 216390859 | G        | A        | 64             | 0.0                        | 58           | 29.3                     | USH2A           | CCDS31025.1     | c.3027C>T           | p.A1009A       | silent           | T                 |
| 827        | PD6619 | ET          | JAK2              | 18  | 9887213   | C        | T        | 286            | 0.0                        | 245          | 26.5                     | TXNDC2          | CCDS42414.1     | c.737C>T            | p.T246I        | missense         | T                 |
| 828        | PD6619 | ET          | JAK2              | 19  | 51827026  | A        | G        | 24             | 0.0                        | 30           | 16.7                     | IGLON5          | CCDS46158.1     | c.269A>G            | p.N90S         | missense         | T                 |
| 829        | PD6619 | ET          | JAK2              | 8   | 95178104  | G        | A        | 62             | 0.0                        | 71           | 9.9                      | CDH17           | CCDS6260.1      | c.1167C>T           | p.P389P        | silent           | T                 |
| 830        | PD6619 | ET          | JAK2              | 16  | 4751105   | G        | A        | 85             | 0.0                        | 182          | 7.7                      | ANKS3           | CCDS10520.1     | c.1150C>T           | p.R384C        | missense         | T                 |

| Variant No | PDID   | MPN Subtype | JAK2/MPL mutation | Chr | Position  | Ref base | Mut base | Germline reads | Germline allele burden (%) | Tumour reads | Tumour allele burden (%) | Gene            | CCDS            | DNA Change          | Protein Change | Type of Change   | Validation Method |
|------------|--------|-------------|-------------------|-----|-----------|----------|----------|----------------|----------------------------|--------------|--------------------------|-----------------|-----------------|---------------------|----------------|------------------|-------------------|
| 831        | PD6619 | ET          | JAK2              | 5   | 90049557  | C        | T        | 144            | 0.0                        | 151          | 7.3                      | GPR98           | CCDS47246.1     | c.11288C>T          | p.S3763F       | missense         | T                 |
| 832        | PD6619 | ET          | JAK2              | 6   | 148848683 | C        | T        | 106            | 0.0                        | 111          | 6.3                      | SASH1           | CCDS5212.1      | c.1379C>T           | p.T460M        | missense         | T                 |
| 833        | PD6619 | ET          | JAK2              | 12  | 95650963  | G        | T        | 161            | 0.0                        | 203          | 4.4                      | VEZT            | CCDS44954.1     | c.206G>T            | p.S69I         | missense         | T                 |
| 834        | PD6626 | ET          | JAK2              | 9   | 5073770   | G        | T        | 174            | 1.7                        | 164          | 72.6                     | JAK2            | CCDS6457.1      | c.1849G>T           | p.V617F        | missense         | T                 |
| 835        | PD6626 | ET          | JAK2              | 19  | 50958380  | G        | A        | 61             | 0.0                        | 96           | 39.6                     | MYBPC2          | CCDS46152.1     | c.2030G>A           | p.R677Q        | missense         | T                 |
| 836        | PD6626 | ET          | JAK2              | 5   | 169535413 | C        | T        | 35             | 0.0                        | 37           | 37.8                     | FOXI1           | CCDS4372.1      | c.935C>T            | p.T312M        | missense         | T                 |
| 837        | PD6626 | ET          | JAK2              | 6   | 125619850 | C        | T        | 51             | 0.0                        | 59           | 37.3                     | HDDC2           | CCDS43503.1     | c.309+10G>A         | p.?            | splice           | T                 |
| 838        | PD6626 | ET          | JAK2              | 21  | 35254619  | G        | A        | 50             | 0.0                        | 68           | 36.8                     | ITSN1           | CCDS33545.1     | c.4414G>A           | p.A1472T       | missense         | T                 |
| 839        | PD6626 | ET          | JAK2              | 16  | 67696071  | C        | T        | 10             | 0.0                        | 32           | 31.3                     | PARD6A          | CCDS10843.1     | c.562C>T            | p.R188W        | missense         | T                 |
| 840        | PD6626 | ET          | JAK2              | 6   | 126320661 | T        | C        | 278            | 0.0                        | 122          | 30.3                     | TRMT11          | CCDS35496.1     | c.581T>C            | p.I194T        | missense         | T                 |
| 841        | PD6626 | ET          | JAK2              | 11  | 55419131  | C        | T        | 381            | 0.3                        | 209          | 29.7                     | OR4S2           | CCDS31505.1     | c.752C>T            | p.P251L        | missense         | T                 |
| 842        | PD6626 | ET          | JAK2              | 3   | 185636158 | G        | A        | 145            | 0.0                        | 144          | 23.6                     | TRA2B           | CCDS33905.1     | c.851C>T            | p.S284L        | missense         | T                 |
| 843        | PD6626 | ET          | JAK2              | 6   | 56819403  | G        | A        | 12             | 0.0                        | 26           | 23.1                     | DST             | ENST00000281662 | c.2C>T              | p.P1L          | missense         | T                 |
| 844        | PD6626 | ET          | JAK2              | 19  | 49253923  | G        | A        | 51             | 0.0                        | 135          | 14.1                     | FUT1            | CCDS12733.1     | c.616C>T            | p.R206C        | missense         | T                 |
| 845        | PD6626 | ET          | JAK2              | 12  | 41949546  | G        | T        | 268            | 0.0                        | 149          | 9.4                      | PDZRN4          | CCDS8739.1      | c.575G>T            | p.G192V        | missense         | T                 |
| 846        | PD6626 | ET          | JAK2              | 12  | 41949545  | G        | A        | 275            | 0.0                        | 152          | 8.6                      | PDZRN4          | CCDS8739.1      | c.574G>A            | p.G192R        | missense         | T                 |
| 847        | PD6626 | ET          | JAK2              | 1   | 53504619  | G        | A        | 200            | 0.0                        | 97           | 7.2                      | SCP2            | CCDS572.1       | c.1369G>A           | p.G457S        | missense         | T                 |
| 848        | PD6626 | ET          | JAK2              | 19  | 9058926   | G        | A        | 157            | 0.0                        | 248          | 4.8                      | MUC16           | ENST00000331986 | c.15419C>T          | p.T5140M       | missense         | T                 |
| 849        | PD6626 | ET          | JAK2              | 11  | 10876254  | G        | C        | 191            | 0.0                        | 166          | 4.2                      | ZBED5           | ENST00000432999 | c.239C>G            | p.S80C         | missense         | T                 |
| 850        | PD6628 | ET          | unmutated         | 19  | 13054627  | _        | insTTGTC | 13             | 15.4                       | 10           | 40.0                     | CALR            | CCDS12288.1     | c.1154_1155insTTGTC | p.K385fs*47    | frameshift       | M T C             |
| 851        | PD6628 | ET          | unmutated         | 7   | 148507424 | C        | G        | 60             | 5.0                        | 39           | 18.0                     | EZH2            | CCDS5891.1      | c.2029+1G>C         | p.?            | essential splice | M                 |
| 852        | PD6628 | ET          | unmutated         | 7   | 142989778 | C        | A        | 60             | 0.0                        | 42           | 11.9                     | CASP2           | CCDS5879.1      | c.462C>A            | p.L154L        | silent           | M                 |
| 853        | PD6629 | ET          | JAK2              | 12  | 58112814  | G        | A        | 297            | 5.4                        | 191          | 48.2                     | OS9             | CCDS31843.1     | c.1449G>A           | p.E483E        | silent           | T C               |
| 854        | PD6629 | ET          | JAK2              | 11  | 129993661 | G        | A        | 103            | 1.0                        | 107          | 46.7                     | APLP2           | CCDS8486.1      | c.1077G>A           | p.V359V        | silent           | T C               |
| 855        | PD6629 | ET          | JAK2              | 9   | 5073770   | G        | T        | 123            | 0.8                        | 208          | 44.2                     | JAK2            | CCDS6457.1      | c.1849G>T           | p.V617F        | missense         | T C               |
| 856        | PD6629 | ET          | JAK2              | 15  | 42564273  | T        | C        | 91             | 3.3                        | 109          | 42.2                     | TMEM87A         | CCDS32205.1     | c.193A>G            | p.I65V         | missense         | T C               |
| 857        | PD6629 | ET          | JAK2              | 2   | 198511265 | G        | A        | 84             | 3.6                        | 239          | 37.2                     | RFTN2           | CCDS2323.1      | c.265C>T            | p.R89*         | nonsense         | T C               |
| 858        | PD6629 | ET          | JAK2              | 2   | 25457242  | C        | T        | 56             | 0.0                        | 67           | 34.3                     | DNMT3A          | CCDS33157.1     | c.2645G>A           | p.R882H        | missense         | T C               |
| 859        | PD6629 | ET          | JAK2              | 4   | 106157326 | _        | insA     | 70             | 0.0                        | 97           | 11.3                     | TET2            | CCDS47120.1     | c.2227_2228insA     | p.Q744fs*10    | frameshift       | T C               |
| 860        | PD6637 | ET          | MPL               | 18  | 32374073  | C        | T        | 54             | 7.4                        | 37           | 29.7                     | DTNA            | CCDS42425.1     | c.221C>T            | p.T74I         | missense         | M                 |
| 861        | PD6637 | ET          | MPL               | 19  | 34819061  | C        | A        | 18             | 0.0                        | 36           | 16.7                     | KIAA0355        | CCDS12436.1     | c.1104+5C>A         | p.?            | essential splice | M                 |
| 862        | PD6637 | ET          | MPL               | X   | 53590752  | C        | A        | 19             | 0.0                        | 32           | 15.6                     | HUWE1           | CCDS35301.1     | c.7060G>T           | p.E2354*       | nonsense         | M                 |
| 863        | PD6637 | ET          | MPL               | 17  | 71166765  | C        | A        | 18             | 0.0                        | 42           | 14.3                     | SSTR2           | CCDS11691.1     | Non-coding          | r.1667c>a      | UTR              | M                 |
| 864        | PD6637 | ET          | MPL               | 12  | 73046869  | C        | A        | 66             | 0.0                        | 54           | 13.0                     | TRHDE           | CCDS9004.1      | c.2782C>A           | p.R928R        | silent           | M                 |
| 865        | PD6637 | ET          | MPL               | 7   | 99697209  | C        | A        | 28             | 0.0                        | 64           | 10.9                     | MCM7            | CCDS5683.1      | c.276+3G>T          | p.?            | splice           | M                 |
| 866        | PD6637 | ET          | MPL               | 18  | 23713967  | C        | A        | 75             | 0.0                        | 65           | 10.8                     | PSMA8           | CCDS32808.1     | c.38C>A             | p.S13Y         | missense         | M                 |
| 867        | PD6637 | ET          | MPL               | 6   | 2890534   | C        | A        | 66             | 0.0                        | 80           | 10.0                     | SERPINB9        | CCDS4478.1      | c.994G>T            | p.A332S        | missense         | M                 |
| 868        | PD6637 | ET          | MPL               | 13  | 36765945  | C        | A        | 135            | 0.0                        | 123          | 7.3                      | SOHLH2          | CCDS9355.1      | c.517G>T            | p.D173Y        | missense         | M                 |
| 869        | PD6637 | ET          | MPL               | 5   | 63894228  | C        | A        | 180            | 0.0                        | 161          | 6.8                      | RGS7BP          | CCDS34170.1     | c.648C>A            | p.L216L        | silent           | M                 |
| 870        | PD6637 | ET          | MPL               | 1   | 43815009  | G        | T        | 27             | 0.0                        | 42           | 4.8                      | MPL             | CCDS483.1       | c.1544G>T           | p.W515L        | missense         | T                 |
| 871        | PD6642 | ET          | JAK2              | 9   | 5073770   | G        | T        | 95             | 10.5                       | 143          | 25.9                     | JAK2            | CCDS6457.1      | c.1849G>T           | p.V617F        | missense         | T                 |
| 872        | PD6642 | ET          | JAK2              | 2   | 80136837  | C        | T        | 29             | 0.0                        | 46           | 13.0                     | CTNNA2          | CCDS42703.2     | c.970C>T            | p.R324*        | nonsense         | T                 |
| 873        | PD6642 | ET          | JAK2              | 4   | 2175745   | C        | T        | 140            | 0.7                        | 149          | 10.1                     | POLN            | CCDS3360.1      | c.1311G>A           | p.V437V        | silent           | T                 |
| 874        | PD6642 | ET          | JAK2              | X   | 134428048 | T        | A        | 122            | 0.0                        | 211          | 7.6                      | ZNF75D          | CCDS14648.1     | c.19A>T             | p.N7Y          | missense         | T                 |
| 875        | PD6642 | ET          | JAK2              | 1   | 176853475 | C        | T        | 43             | 0.0                        | 113          | 7.1                      | ASTN1           | CCDS1319.1      | c.3226G>A           | p.E1076K       | missense         | T                 |
| 876        | PD6644 | ET          | JAK2              | 17  | 42090488  | G        | A        | 25             | 0.0                        | 27           | 14.8                     | TMEM101         | CCDS11474.1     | c.354C>T            | p.G118G        | silent           | T                 |
| 877        | PD6644 | ET          | JAK2              | 9   | 5073770   | G        | T        | 237            | 0.0                        | 126          | 13.5                     | JAK2            | CCDS6457.1      | c.1849G>T           | p.V617F        | missense         | T                 |
| 878        | PD6646 | ET          | JAK2              | 22  | 38212690  | G        | A        | 22             | 0.0                        | 38           | 60.5                     | GCAT            | CCDS13957.1     | c.1225G>A           | p.V409M        | missense         | T C               |
| 879        | PD6646 | ET          | JAK2              | X   | 153209030 | G        | A        | 19             | 0.0                        | 37           | 59.5                     | RENBP           | CCDS14738.2     | c.430C>T            | p.L144L        | silent           | T C               |
| 880        | PD6646 | ET          | JAK2              | 5   | 139744100 | T        | A        | 20             | 0.0                        | 26           | 53.9                     | SLC4A9          | CCDS47278.1     | c.1541T>A           | p.I514N        | missense         | T C               |
| 881        | PD6646 | ET          | JAK2              | 1   | 40767003  | C        | G        | 23             | 0.0                        | 23           | 52.2                     | COL9A2          | CCDS450.1       | c.1921G>C           | p.G641R        | missense         | T C               |
| 882        | PD6646 | ET          | JAK2              | 2   | 21362519  | A        | G        | 58             | 1.7                        | 89           | 48.3                     | ENSG00000218819 | ENST00000405799 | c.2180A>G           | p.N727S        | missense         | T C               |

| Variant No | PDID   | MPN Subtype | JAK2/MPL mutation | Chr | Position  | Ref base | Mut base          | Germline reads | Germline allele burden (%) | Tumour reads | Tumour allele burden (%) | Gene     | CCDS            | DNA Change         | Protein Change  | Type of Change   | Validation Method |
|------------|--------|-------------|-------------------|-----|-----------|----------|-------------------|----------------|----------------------------|--------------|--------------------------|----------|-----------------|--------------------|-----------------|------------------|-------------------|
| 883        | PD6646 | ET          | JAK2              | 2   | 219691670 | C        | T                 | 32             | 0.0                        | 40           | 45.0                     | PRKAG3   | CCDS2424.1      | c.1149G>A          | p.L383L         | silent           | T C               |
| 884        | PD6646 | ET          | JAK2              | 11  | 9519238   | T        | A                 | 73             | 1.4                        | 62           | 43.6                     | ZNF143   | CCDS7799.2      | c.858T>A           | p.S286R         | missense         | T C               |
| 885        | PD6646 | ET          | JAK2              | 5   | 38957800  | A        | G                 | 118            | 0.0                        | 117          | 42.7                     | RICTOR   | CCDS34148.1     | c.2453T>C          | p.L818P         | missense         | T C               |
| 886        | PD6646 | ET          | JAK2              | 1   | 20829715  | C        | T                 | 24             | 0.0                        | 58           | 41.4                     | MUL1     | CCDS208.1       | c.208G>A           | p.G70R          | missense         | T C               |
| 887        | PD6646 | ET          | JAK2              | X   | 119388450 | _        | delA              | 138            | 0.0                        | 146          | 41.1                     | ZBTB33   | CCDS14596.1     | c.1180delA         | p.I394fs*0      | frameshift       | T                 |
| 888        | PD6646 | ET          | JAK2              | 3   | 39227114  | G        | A                 | 35             | 0.0                        | 36           | 38.9                     | XIRP1    | CCDS2683.1      | c.3823C>T          | p.R1275C        | missense         | T C               |
| 889        | PD6646 | ET          | JAK2              | 5   | 154394878 | G        | A                 | 161            | 0.0                        | 173          | 36.4                     | KIF4B    | CCDS47324.1     | c.1459G>A          | p.A487T         | missense         | T C               |
| 890        | PD6646 | ET          | JAK2              | 9   | 5073770   | G        | T                 | 114            | 0.0                        | 139          | 36.0                     | JAK2     | CCDS6457.1      | c.1849G>T          | p.V617F         | missense         | T C               |
| 891        | PD6646 | ET          | JAK2              | 2   | 238742968 | G        | A                 | 93             | 0.0                        | 88           | 34.1                     | RBM44    | CCDS46554.1     | c.3083G>A          | p.G1028D        | missense         | T C               |
| 892        | PD6646 | ET          | JAK2              | 15  | 72144573  | A        | T                 | 49             | 0.0                        | 73           | 32.9                     | MYO9A    | CCDS10239.1     | c.6375T>A          | p.Y2125*        | nonsense         | T C               |
| 893        | PD6646 | ET          | JAK2              | 2   | 25469624  | _        | delTCCCC<13>CCACC | 52             | 0.0                        | 47           | 17.0                     | DNMT3A   | CCDS33157.1     | c.1123-1_1144del23 | p.?             | frameshift       | T C               |
| 894        | PD6646 | ET          | JAK2              | 15  | 26812851  | G        | A                 | 87             | 0.0                        | 65           | 7.7                      | GABRB3   | CCDS10019.1     | c.712C>T           | p.R238W         | missense         | T C               |
| 895        | PD6646 | ET          | JAK2              | 3   | 38888444  | A        | G                 | 72             | 1.4                        | 159          | 6.3                      | SCN11A   | CCDS33737.1     | c.5117T>C          | p.M1706T        | missense         | T C               |
| 896        | PD6646 | ET          | JAK2              | 11  | 119148981 | T        | A                 | 91             | 0.0                        | 123          | 4.9                      | CBL      | CCDS8418.1      | c.1201T>A          | p.C401S         | missense         | T C               |
| 897        | PD6647 | ET          | JAK2              | 3   | 48999113  | G        | A                 | 85             | 1.2                        | 54           | 48.2                     | ARIH2    | CCDS2780.1      | c.323+1G>A         | p.?             | essential splice | M                 |
| 898        | PD6647 | ET          | JAK2              | 15  | 100672279 | A        | T                 | 23             | 0.0                        | 23           | 39.1                     | ADAMTS17 | CCDS10383.1     | c.1654T>A          | p.W552R         | missense         | M                 |
| 899        | PD6647 | ET          | JAK2              | 9   | 123476543 | _        | delICGGCGG        | 2              | 0.0                        | 16           | 25.0                     | MEGF9    | CCDS48010.1     | c.65_70delICGGCGG  | p.A22_A23delIAA | inframe          | M                 |
| 900        | PD6647 | ET          | JAK2              | 1   | 157668287 | T        | G                 | 77             | 2.6                        | 91           | 23.1                     | FCRL3    | CCDS1167.1      | c.185A>C           | p.E62A          | missense         | M                 |
| 901        | PD6647 | ET          | JAK2              | 9   | 5073770   | G        | T                 | 165            | 0.0                        | 119          | 10.1                     | JAK2     | CCDS6457.1      | c.1849G>T          | p.V617F         | missense         | T                 |
| 902        | PD6647 | ET          | JAK2              | 8   | 25287389  | G        | A                 | 216            | 0.0                        | 192          | 9.9                      | KCTD9    | CCDS6048.1      | c.1154C>T          | p.S385L         | missense         | M                 |
| 903        | PD6647 | ET          | JAK2              | 4   | 148582072 | C        | A                 | 148            | 0.0                        | 74           | 9.5                      | PRMT10   | CCDS3771.1      | c.1071G>T          | p.M357I         | missense         | M                 |
| 904        | PD6647 | ET          | JAK2              | 1   | 213046037 | C        | A                 | 81             | 0.0                        | 91           | 8.8                      | FLVCR1   | CCDS1510.1      | c.901C>A           | p.R301R         | silent           | M                 |
| 905        | PD6647 | ET          | JAK2              | 3   | 57454685  | C        | T                 | 140            | 0.0                        | 134          | 8.2                      | DNAH12   | CCDS46857.1     | c.2127G>A          | p.L709L         | silent           | M                 |
| 906        | PD6647 | ET          | JAK2              | 14  | 75514023  | G        | A                 | 101            | 1.0                        | 144          | 7.6                      | MLH3     | CCDS32123.1     | c.2336C>T          | p.T779I         | missense         | M                 |
| 907        | PD6647 | ET          | JAK2              | 1   | 203786225 | _        | delIT             | 106            | 0.0                        | 80           | 7.5                      | ZC3H11A  | CCDS30978.1     | c.27delIT          | p.F12fs*20      | frameshift       | M                 |
| 908        | PD6648 | ET          | JAK2              | 15  | 41961052  | G        | A                 | 143            | 0.7                        | 136          | 19.9                     | MGA      | ENST00000219905 | Non-coding         | r.141g>a        | start gained     | T                 |
| 909        | PD6648 | ET          | JAK2              | 9   | 5073770   | G        | T                 | 163            | 0.6                        | 187          | 18.2                     | JAK2     | CCDS6457.1      | c.1849G>T          | p.V617F         | missense         | T                 |
| 910        | PD6648 | ET          | JAK2              | 20  | 34022174  | G        | A                 | 47             | 0.0                        | 66           | 18.2                     | GDF5     | CCDS13254.1     | c.1039C>T          | p.R347C         | missense         | T                 |
| 911        | PD6648 | ET          | JAK2              | 12  | 21954026  | C        | G                 | 56             | 0.0                        | 102          | 15.7                     | ABCC9    | CCDS8693.1      | c.4602G>C          | p.L1534F        | missense         | T                 |
| 912        | PD6648 | ET          | JAK2              | 15  | 60740283  | T        | C                 | 298            | 1.3                        | 168          | 15.5                     | NARG2    | CCDS10176.1     | c.2181A>G          | p.E727E         | silent           | T                 |
| 913        | PD6648 | ET          | JAK2              | 2   | 197674092 | C        | T                 | 122            | 0.0                        | 111          | 13.5                     | C2orf66  | CCDS2317.1      | c.20G>A            | p.R7H           | missense         | T                 |
| 914        | PD6648 | ET          | JAK2              | X   | 31152268  | C        | T                 | 52             | 3.9                        | 71           | 12.7                     | DMD      | CCDS14233.1     | c.10965G>A         | p.G3655G        | silent           | T                 |
| 915        | PD6650 | ET          | JAK2              | 8   | 113236797 | G        | A                 | 13             | 0.0                        | 8            | 50.0                     | CSMD3    | CCDS6315.1      | Non-coding         | r.11572c>u      | UTR              | M                 |
| 916        | PD6650 | ET          | JAK2              | 8   | 73850113  | G        | C                 | 86             | 0.0                        | 75           | 42.7                     | KCNB2    | CCDS6209.1      | c.2523G>C          | p.G841G         | silent           | M                 |
| 917        | PD6650 | ET          | JAK2              | 1   | 185153997 | G        | A                 | 186            | 0.5                        | 161          | 41.0                     | C1orf26  | CCDS1367.1      | c.1363G>A          | p.D455N         | missense         | M                 |
| 918        | PD6650 | ET          | JAK2              | 7   | 150555973 | G        | A                 | 17             | 0.0                        | 40           | 40.0                     | ABP1     | CCDS43679.1     | c.1693G>A          | p.A565T         | missense         | M                 |
| 919        | PD6650 | ET          | JAK2              | 7   | 51111193  | C        | T                 | 63             | 0.0                        | 93           | 38.7                     | COBL     | CCDS34637.1     | c.1293G>A          | p.K431K         | silent           | M                 |
| 920        | PD6650 | ET          | JAK2              | 17  | 10409167  | G        | A                 | 71             | 0.0                        | 73           | 38.4                     | MYH1     | CCDS11155.1     | c.2136C>T          | p.G712G         | silent           | M                 |
| 921        | PD6650 | ET          | JAK2              | 2   | 77745645  | G        | A                 | 255            | 0.8                        | 201          | 37.3                     | LRRTM4   | CCDS46346.1     | c.1350C>T          | p.Y450Y         | silent           | M                 |
| 922        | PD6650 | ET          | JAK2              | 6   | 79713494  | C        | A                 | 96             | 0.0                        | 51           | 35.3                     | PHIP     | CCDS4987.1      | c.1606G>T          | p.G536*         | nonsense         | M                 |
| 923        | PD6650 | ET          | JAK2              | 8   | 133146533 | C        | T                 | 98             | 0.0                        | 61           | 31.2                     | KCNQ3    | CCDS34943.1     | c.1799+4G>A        | p.?             | splice           | M                 |
| 924        | PD6650 | ET          | JAK2              | 9   | 5073770   | G        | T                 | 208            | 0.0                        | 99           | 27.3                     | JAK2     | CCDS6457.1      | c.1849G>T          | p.V617F         | missense         | T                 |
| 925        | PD6650 | ET          | JAK2              | 1   | 235657991 | C        | T                 | 176            | 0.6                        | 146          | 26.7                     | B3GALNT2 | CCDS1606.1      | c.260G>A           | p.R87H          | missense         | M                 |
| 926        | PD6650 | ET          | JAK2              | X   | 53239664  | G        | T                 | 33             | 0.0                        | 29           | 20.7                     | KDM5C    | CCDS14351.1     | c.1678C>A          | p.Q560K         | missense         | M                 |
| 927        | PD6650 | ET          | JAK2              | 6   | 111912621 | _        | insC              | 54             | 0.0                        | 78           | 9.0                      | TRAF3IP2 | CCDS5092.1      | c.695_696insG      | p.Y232fs*1      | frameshift       | M                 |
| 928        | PD6650 | ET          | JAK2              | 3   | 38407165  | C        | G                 | 12             | 0.0                        | 50           | 8.0                      | XYLB     | CCDS2678.1      | c.445C>G           | p.L149V         | missense         | M                 |
| 929        | PD6653 | ET          | JAK2              | 9   | 5073770   | G        | T                 | 153            | 3.3                        | 121          | 30.6                     | JAK2     | CCDS6457.1      | c.1849G>T          | p.V617F         | missense         | T                 |
| 930        | PD6653 | ET          | JAK2              | 20  | 31389221  | C        | T                 | 38             | 0.0                        | 45           | 11.1                     | DNMT3B   | CCDS13205.1     | c.2134C>T          | p.R712W         | missense         | T                 |
| 931        | PD6653 | ET          | JAK2              | 15  | 101432816 | C        | A                 | 30             | 0.0                        | 68           | 10.3                     | ALDH1A3  | CCDS10389.1     | c.447C>A           | p.D149E         | missense         | T                 |
| 932        | PD6654 | ET          | JAK2              | 5   | 140711266 | G        | T                 | 81             | 0.0                        | 96           | 44.8                     | PCDHGA1  | CCDS34256.1     | c.1015G>T          | p.D339Y         | missense         | T                 |
| 933        | PD6654 | ET          | JAK2              | 17  | 7577121   | G        | C                 | 42             | 2.4                        | 33           | 42.4                     | TP53     | CCDS11118.1     | c.817C>G           | p.R273G         | missense         | T                 |
| 934        | PD6654 | ET          | JAK2              | 11  | 34979073  | C        | T                 | 68             | 0.0                        | 98           | 37.8                     | PDHX     | CCDS7896.1      | c.485C>T           | p.S162L         | missense         | T                 |

| Variant No | PDID   | MPN Subtype | JAK2/MPL mutation | Chr | Position  | Ref base | Mut base | Germline reads | Germline allele burden (%) | Tumour reads | Tumour allele burden (%) | Gene     | CCDS            | DNA Change       | Protein Change | Type of Change | Validation Method |
|------------|--------|-------------|-------------------|-----|-----------|----------|----------|----------------|----------------------------|--------------|--------------------------|----------|-----------------|------------------|----------------|----------------|-------------------|
| 935        | PD6654 | ET          | JAK2              | 9   | 5073770   | G        | T        | 116            | 0.8                        | 150          | 36.0                     | JAK2     | CCDS6457.1      | c.1849G>T        | p.V617F        | missense       | T                 |
| 936        | PD6654 | ET          | JAK2              | 2   | 152563482 | A        | T        | 242            | 0.8                        | 115          | 35.7                     | NEB      | CCDS46424.1     | c.1065T>A        | p.N355K        | missense       | T                 |
| 937        | PD6654 | ET          | JAK2              | 3   | 96706460  | C        | T        | 350            | 0.3                        | 500          | 35.6                     | EPHA6    | CCDS46876.1     | c.737C>T         | p.A246V        | missense       | T                 |
| 938        | PD6654 | ET          | JAK2              | 10  | 118896116 | C        | A        | 32             | 0.0                        | 32           | 34.4                     | VAX1     | CCDS44483.1     | c.296G>T         | p.R99L         | missense       | T                 |
| 939        | PD6654 | ET          | JAK2              | 7   | 94043209  | G        | A        | 43             | 0.0                        | 43           | 32.6                     | COL1A2   | CCDS34682.1     | c.1615G>A        | p.V539I        | missense       | T                 |
| 940        | PD6654 | ET          | JAK2              | 20  | 40044124  | T        | A        | 29             | 0.0                        | 43           | 25.6                     | CHD6     | CCDS13317.1     | c.6641A>T        | p.E2214V       | missense       | T                 |
| 941        | PD6654 | ET          | JAK2              | 2   | 234294602 | G        | T        | 28             | 0.0                        | 76           | 21.1                     | DGKD     | ENST00000447484 | c.12G>T          | p.S4S          | silent         | T                 |
| 942        | PD6654 | ET          | JAK2              | 21  | 10916395  | T        | C        | 415            | 0.0                        | 369          | 14.4                     | TPTE     | CCDS13560.2     | c.1251A>G        | p.K417K        | silent         | T                 |
| 943        | PD6654 | ET          | JAK2              | 3   | 52536076  | G        | A        | 21             | 0.0                        | 43           | 14.0                     | STAB1    | CCDS33768.1     | c.386G>A         | p.G129D        | missense       | T                 |
| 944        | PD6654 | ET          | JAK2              | 7   | 126882891 | A        | G        | 56             | 0.0                        | 87           | 13.8                     | GRM8     | CCDS5794.1      | c.368T>C         | p.L123S        | missense       | T                 |
| 945        | PD6654 | ET          | JAK2              | 2   | 207452084 | A        | G        | 234            | 0.0                        | 143          | 6.3                      | ADAM23   | CCDS2369.1      | c.1773A>G        | p.A591A        | silent         | T                 |
| 946        | PD6654 | ET          | JAK2              | 20  | 31022284  | -        | insT     | 99             | 0.0                        | 133          | 3.8                      | ASXL1    | CCDS13201.1     | c.1769_1770insT  | p.Y591fs*28    | frameshift     | M                 |
| 947        | PD6656 | ET          | JAK2              | 9   | 5073770   | G        | T        | 102            | 7.8                        | 49           | 24.5                     | JAK2     | CCDS6457.1      | c.1849G>T        | p.V617F        | missense       | T                 |
| 948        | PD6656 | ET          | JAK2              | 5   | 9629623   | T        | C        | 60             | 3.3                        | 74           | 14.9                     | TAS2R1   | CCDS3876.1      | c.522A>G         | p.I174M        | missense       | T                 |
| 949        | PD6661 | ET          | JAK2              | 2   | 25457242  | C        | T        | 30             | 0.0                        | 74           | 41.9                     | DNMT3A   | CCDS33157.1     | c.2645G>A        | p.R882H        | missense       | T C               |
| 950        | PD6661 | ET          | JAK2              | 11  | 61295466  | G        | A        | 23             | 0.0                        | 124          | 30.7                     | SYT7     | CCDS31577.1     | c.543C>T         | p.P181P        | silent         | T                 |
| 951        | PD6661 | ET          | JAK2              | 18  | 32418142  | T        | C        | 47             | 4.3                        | 95           | 30.5                     | DTNA     | CCDS42425.1     | c.1172+7T>C      | p.?            | splice         | T                 |
| 952        | PD6661 | ET          | JAK2              | 2   | 17884509  | T        | A        | 51             | 5.9                        | 192          | 29.2                     | SMC6     | CCDS1690.1      | c.2057A>T        | p.Q686L        | missense       | T                 |
| 953        | PD6661 | ET          | JAK2              | 19  | 9087213   | A        | T        | 124            | 0.0                        | 500          | 26.0                     | MUC16    | ENST00000397910 | c.4602T>A        | p.T1534T       | silent         | T                 |
| 954        | PD6661 | ET          | JAK2              | 9   | 5073770   | G        | T        | 68             | 0.0                        | 246          | 23.2                     | JAK2     | CCDS6457.1      | c.1849G>T        | p.V617F        | missense       | T                 |
| 955        | PD6661 | ET          | JAK2              | 19  | 50204031  | G        | A        | 69             | 1.5                        | 182          | 23.1                     | CPT1C    | CCDS12779.1     | c.372G>A         | p.V124V        | silent         | T                 |
| 956        | PD6661 | ET          | JAK2              | 18  | 34853037  | C        | T        | 13             | 0.0                        | 42           | 21.4                     | CELF4    | CCDS32818.1     | c.891G>A         | p.Q297Q        | silent         | T                 |
| 957        | PD6661 | ET          | JAK2              | 5   | 16818188  | G        | A        | 19             | 0.0                        | 96           | 20.8                     | MYO10    | ENST00000427430 | c.209C>T         | p.S70F         | missense       | T                 |
| 958        | PD6661 | ET          | JAK2              | 5   | 175711747 | G        | A        | 39             | 0.0                        | 157          | 18.5                     | C5orf25  | ENST00000443967 | c.563G>A         | p.C188Y        | missense       | T                 |
| 959        | PD6661 | ET          | JAK2              | 9   | 104189866 | C        | T        | 26             | 0.0                        | 141          | 14.9                     | ALDOB    | CCDS6756.1      | c.438G>A         | p.G146G        | silent         | T                 |
| 960        | PD6661 | ET          | JAK2              | 17  | 40996845  | A        | T        | 73             | 0.0                        | 298          | 8.4                      | AOC2     | CCDS11443.1     | c.202A>T         | p.M68L         | missense       | T                 |
| 961        | PD6661 | ET          | JAK2              | 1   | 150234627 | -        | delC     | 63             | 0.0                        | 212          | 8.0                      | CA14     | CCDS947.1       | c.327delC        | p.L110fs*38    | frameshift     | T                 |
| 962        | PD7268 | ET          | JAK2              | 9   | 5073770   | G        | T        | 131            | 0.8                        | 118          | 5.9                      | JAK2     | CCDS6457.1      | c.1849G>T        | p.V617F        | missense       | M                 |
| 963        | PD7269 | ET          | JAK2              | 9   | 5073770   | G        | T        | 103            | 3.9                        | 113          | 17.7                     | JAK2     | CCDS6457.1      | c.1849G>T        | p.V617F        | missense       | T                 |
| 964        | PD7269 | ET          | JAK2              | 8   | 20022628  | T        | C        | 36             | 0.0                        | 70           | 8.6                      | SLC18A1  | CCDS6013.1      | c.859-10A>G      | p.?            | splice         | T                 |
| 965        | PD7270 | ET          | JAK2              | 19  | 8651554   | G        | T        | 52             | 1.9                        | 98           | 31.6                     | ADAMTS10 | CCDS12206.1     | c.2291C>A        | p.P764H        | missense       | T                 |
| 966        | PD7270 | ET          | JAK2              | 9   | 5073770   | G        | T        | 153            | 0.0                        | 236          | 27.5                     | JAK2     | CCDS6457.1      | c.1849G>T        | p.V617F        | missense       | T                 |
| 967        | PD7271 | ET          | JAK2              | 9   | 5073770   | G        | T        | 147            | 0.0                        | 166          | 4.8                      | JAK2     | CCDS6457.1      | c.1849G>T        | p.V617F        | missense       | T                 |
| 968        | PD7272 | ET          | JAK2              | 9   | 5073770   | G        | T        | 145            | 0.7                        | 201          | 9.0                      | JAK2     | CCDS6457.1      | c.1849G>T        | p.V617F        | missense       | T                 |
| 969        | PD7272 | ET          | JAK2              | 16  | 112802    | C        | T        | 41             | 0.0                        | 126          | 7.1                      | RHBDF1   | CCDS32344.1     | c.766G>A         | p.D256N        | missense       | T                 |
| 970        | PD7272 | ET          | JAK2              | 4   | 139980385 | T        | C        | 137            | 0.7                        | 173          | 6.4                      | ELF2     | CCDS3744.1      | c.1498A>G        | p.M500V        | missense       | T                 |
| 971        | PD7272 | ET          | JAK2              | 1   | 32498884  | T        | A        | 99             | 0.0                        | 124          | 4.8                      | KHDRBS1  | CCDS350.1       | c.720T>A         | p.A240A        | silent         | T                 |
| 972        | PD7273 | ET          | JAK2              | 1   | 1635577   | A        | G        | 12             | 0.0                        | 23           | 26.1                     | CDK11B   | CCDS44042.1     | c.1695T>C        | p.D565D        | silent         | M                 |
| 973        | PD7273 | ET          | JAK2              | 1   | 1635574   | A        | G        | 12             | 0.0                        | 22           | 22.7                     | CDK11B   | CCDS44042.1     | c.1698T>C        | p.F566F        | silent         | M                 |
| 974        | PD7273 | ET          | JAK2              | 9   | 5073770   | G        | T        | 93             | 1.1                        | 125          | 8.8                      | JAK2     | CCDS6457.1      | c.1849G>T        | p.V617F        | missense       | T                 |
| 975        | PD7274 | ET          | JAK2              | 3   | 75787646  | -        | delAA    | 10             | 1.0                        | 13           | 46.2                     | ZNF717   | CCDS46871.1     | c.1127_1128delIT | p.F376fs*3     | frameshift     | M                 |
| 976        | PD7274 | ET          | JAK2              | 22  | 17680532  | G        | A        | 18             | 0.0                        | 28           | 39.3                     | CECR1    | CCDS13743.1     | Non-coding       | r.142c>u       | start gained   | M                 |
| 977        | PD7274 | ET          | JAK2              | 1   | 204124264 | G        | A        | 50             | 2.0                        | 34           | 38.2                     | REN      | CCDS30981.1     | c.1101C>T        | p.H367H        | silent         | M                 |
| 978        | PD7274 | ET          | JAK2              | 16  | 50104098  | G        | A        | 39             | 2.6                        | 37           | 37.8                     | HEATR3   | CCDS10739.1     | c.409G>A         | p.G137R        | missense       | M                 |
| 979        | PD7274 | ET          | JAK2              | X   | 54013571  | C        | T        | 73             | 0.0                        | 42           | 35.7                     | PHF8     | CCDS14355.1     | c.1935G>A        | p.A645A        | silent         | M                 |
| 980        | PD7274 | ET          | JAK2              | 7   | 103008053 | C        | T        | 104            | 0.0                        | 52           | 28.9                     | PSMC2    | CCDS5731.1      | c.1038C>T        | p.P346P        | silent         | M                 |
| 981        | PD7274 | ET          | JAK2              | 6   | 157714009 | A        | C        | 105            | 0.0                        | 108          | 28.7                     | C6orf35  | CCDS43519.1     | c.350T>G         | p.M117R        | missense       | M                 |
| 982        | PD7274 | ET          | JAK2              | 9   | 37732388  | C        | T        | 64             | 0.0                        | 70           | 28.6                     | FRMPD1   | CCDS6612.1      | c.946C>T         | p.R316W        | missense       | M                 |
| 983        | PD7274 | ET          | JAK2              | 14  | 69925152  | T        | C        | 128            | 0.0                        | 174          | 25.9                     | SLC39A9  | CCDS9795.1      | c.766T>C         | p.Y256H        | missense       | M                 |
| 984        | PD7274 | ET          | JAK2              | X   | 105281066 | T        | A        | 117            | 0.0                        | 75           | 24.0                     | SERPINA7 | CCDS14518.1     | Non-coding       | r.320a>u       | UTR            | M                 |
| 985        | PD7274 | ET          | JAK2              | 22  | 17443634  | C        | T        | 18             | 0.0                        | 25           | 24.0                     | GAB4     | CCDS42976.1     | c.1714G>A        | p.A572T        | missense       | M                 |
| 986        | PD7274 | ET          | JAK2              | 22  | 32113131  | -        | delIG    | 248            | 2.0                        | 193          | 19.7                     | C22orf30 | CCDS13900.2     | c.694delC        | p.Q232fs*3     | frameshift     | M                 |

| Variant No | PDID   | MPN Subtype | JAK2/MPL mutation | Chr | Position  | Ref base | Mut base  | Germline reads | Germline allele burden (%) | Tumour reads | Tumour allele burden (%) | Gene            | CCDS            | DNA Change | Protein Change | Type of Change   | Validation Method |
|------------|--------|-------------|-------------------|-----|-----------|----------|-----------|----------------|----------------------------|--------------|--------------------------|-----------------|-----------------|------------|----------------|------------------|-------------------|
| 987        | PD7274 | ET          | JAK2              | X   | 100129303 | C        | T         | 27             | 0.0                        | 26           | 19.2                     | NOX1            | CCDS14474.1     | Non-coding | r.32g>a        | UTR              | M                 |
| 988        | PD7274 | ET          | JAK2              | 9   | 5073770   | G        | T         | 151            | 0.7                        | 146          | 19.2                     | JAK2            | CCDS6457.1      | c.1849G>T  | p.V617F        | missense         | T                 |
| 989        | PD7274 | ET          | JAK2              | 7   | 94540180  | T        | C         | 37             | 0.0                        | 48           | 12.5                     | PPP1R9A         | CCDS34683.1     | c.755T>C   | p.L252P        | missense         | M                 |
| 990        | PD7274 | ET          | JAK2              | 4   | 106157212 | C        | T         | 112            | 0.0                        | 89           | 7.9                      | TET2            | CCDS47120.1     | c.2113C>T  | p.Q705*        | nonsense         | M                 |
| 991        | PD7275 | PET_PV      | JAK2              | 9   | 5073770   | G        | T         | 172            | 0.0                        | 88           | 39.8                     | JAK2            | CCDS6457.1      | c.1849G>T  | p.V617F        | missense         | T                 |
| 992        | PD7275 | PET_PV      | JAK2              | X   | 107436891 | C        | T         | 251            | 0.8                        | 203          | 18.7                     | COL4A6          | CCDS14541.1     | c.1042G>A  | p.V348I        | missense         | M                 |
| 993        | PD7275 | PET_PV      | JAK2              | 15  | 102300097 | _        | ins_delGC | 16             | 0.0                        | 58           | 8.6                      | AC107977.4      | ENSG00000237157 | Non-coding |                | RNA              | M                 |
| 994        | PD7275 | PET_PV      | JAK2              | 1   | 10355727  | A        | G         | 134            | 0.0                        | 84           | 7.1                      | KIF1B           | CCDS1111.1      | c.1542A>G  | p.Q514Q        | silent           | M                 |
| 995        | PD7276 | PET-PV      | JAK2              | 1   | 11848080  | G        | A         | 63             | 6.4                        | 12           | 50.0                     | C1orf167        | ENST00000433342 | c.3896G>A  | p.S1299N       | missense         | M                 |
| 996        | PD7276 | PET-PV      | JAK2              | 9   | 5073770   | G        | T         | 139            | 0.7                        | 127          | 15.0                     | JAK2            | CCDS6457.1      | c.1849G>T  | p.V617F        | missense         | M                 |
| 997        | PD7276 | PET-PV      | JAK2              | 11  | 48510924  | G        | T         | 159            | 0.6                        | 134          | 14.2                     | OR4A47          | CCDS31490.1     | c.580G>T   | p.G194C        | missense         | M                 |
| 998        | PD7278 | PET-PV      | JAK2              | 9   | 5073770   | G        | T         | 128            | 2.3                        | 119          | 23.5                     | JAK2            | CCDS6457.1      | c.1849G>T  | p.V617F        | missense         | M                 |
| 999        | PD7278 | PET-PV      | JAK2              | 11  | 92714701  | C        | T         | 253            | 0.0                        | 108          | 17.6                     | MTNR1B          | CCDS8290.1      | c.312C>T   | p.D104D        | silent           | M                 |
| 1000       | PD7278 | PET-PV      | JAK2              | 12  | 112371734 | C        | T         | 68             | 0.0                        | 62           | 16.1                     | TMEM116         | CCDS9157.1      | c.413G>A   | p.R138Q        | missense         | M                 |
| 1001       | PD7278 | PET-PV      | JAK2              | 20  | 31395706  | A        | G         | 104            | 1.0                        | 55           | 12.7                     | DNMT3B          | CCDS13205.1     | c.2559A>G  | p.E853E        | silent           | M                 |
| 1002       | PD7278 | PET-PV      | JAK2              | 7   | 128632094 | C        | T         | 108            | 0.0                        | 129          | 12.4                     | TNPO3           | CCDS5809.1      | c.1317G>A  | p.A439A        | silent           | M                 |
| 1003       | PD7278 | PET-PV      | JAK2              | X   | 77224411  | G        | T         | 211            | 0.5                        | 110          | 10.0                     | PGAM4           | CCDS35338.1     | c.725C>A   | p.A242D        | missense         | M                 |
| 1004       | PD7278 | PET-PV      | JAK2              | 1   | 45798841  | C        | T         | 37             | 2.7                        | 70           | 10.0                     | MUTYH           | CCDS44129.1     | c.390G>A   | p.V130V        | silent           | M                 |
| 1005       | PD7279 | PET-PV      | JAK2              | 9   | 5073770   | G        | T         | 210            | 1.9                        | 108          | 68.5                     | JAK2            | CCDS6457.1      | c.1849G>T  | p.V617F        | missense         | T                 |
| 1006       | PD7279 | PET-PV      | JAK2              | 14  | 91942197  | A        | T         | 167            | 1.8                        | 30           | 50.0                     | SMEK1           | CCDS9895.1      | c.1224T>A  | p.D408E        | missense         | T                 |
| 1007       | PD7279 | PET-PV      | JAK2              | X   | 12939245  | C        | T         | 139            | 1.4                        | 92           | 38.0                     | TLR8            | CCDS14152.1     | c.2086C>T  | p.R696C        | missense         | T                 |
| 1008       | PD7279 | PET-PV      | JAK2              | 16  | 89825010  | T        | G         | 174            | 5.2                        | 74           | 37.8                     | FANCA           | CCDS32515.1     | c.2956A>C  | p.N986H        | missense         | T                 |
| 1009       | PD7279 | PET-PV      | JAK2              | 5   | 167674668 | C        | T         | 63             | 1.6                        | 85           | 37.7                     | ODZ2            | ENST00000388903 | c.6223C>T  | p.R2075C       | missense         | T                 |
| 1010       | PD7279 | PET-PV      | JAK2              | 18  | 2891624   | G        | A         | 109            | 4.6                        | 67           | 32.8                     | EMILIN2         | CCDS11828.1     | c.1499G>A  | p.R500H        | missense         | T                 |
| 1011       | PD7279 | PET-PV      | JAK2              | 8   | 91033209  | A        | G         | 62             | 3.2                        | 61           | 32.8                     | DECR1           | CCDS6250.1      | c.490A>G   | p.I164V        | missense         | T                 |
| 1012       | PD7279 | PET-PV      | JAK2              | 12  | 53216930  | C        | T         | 95             | 2.1                        | 49           | 32.7                     | KRT79           | CCDS8839.1      | c.1237G>A  | p.V413M        | missense         | T                 |
| 1013       | PD7279 | PET-PV      | JAK2              | X   | 118724851 | C        | T         | 194            | 1.0                        | 143          | 32.2                     | NKRF            | CCDS35375.1     | c.537G>A   | p.A179A        | silent           | T                 |
| 1014       | PD7279 | PET-PV      | JAK2              | 11  | 118014557 | C        | T         | 32             | 6.3                        | 23           | 30.4                     | SCN4B           | CCDS8389.1      | c.454G>A   | p.V152I        | missense         | T                 |
| 1015       | PD7279 | PET-PV      | JAK2              | 1   | 209963860 | C        | G         | 69             | 0.0                        | 55           | 29.1                     | IRF6            | CCDS1492.1      | c.1040G>C  | p.C347S        | missense         | T                 |
| 1016       | PD7279 | PET-PV      | JAK2              | 4   | 106196641 | G        | T         | 142            | 0.0                        | 116          | 27.6                     | TET2            | CCDS47120.1     | c.4974G>T  | p.L1658L       | silent           | T                 |
| 1017       | PD7280 | PV          | JAK2              | 9   | 5073770   | G        | T         | 170            | 3.5                        | 126          | 25.4                     | JAK2            | CCDS6457.1      | c.1849G>T  | p.V617F        | missense         | T                 |
| 1018       | PD7280 | PV          | JAK2              | 19  | 17411794  | G        | A         | 70             | 0.0                        | 78           | 14.1                     | ABHD8           | CCDS12355.1     | c.632C>T   | p.A211V        | missense         | M                 |
| 1019       | PD7280 | PV          | JAK2              | 6   | 29599327  | G        | A         | 59             | 0.0                        | 72           | 8.3                      | GABBR1          | CCDS4663.1      | c.135C>T   | p.G45G         | silent           | M                 |
| 1020       | PD7281 | PV          | JAK2              | 9   | 5073770   | G        | T         | 104            | 0.0                        | 123          | 99.2                     | JAK2            | CCDS6457.1      | c.1849G>T  | p.V617F        | missense         | T                 |
| 1021       | PD7281 | PV          | JAK2              | 5   | 154275775 | C        | T         | 53             | 0.0                        | 73           | 54.8                     | GEMIN5          | CCDS4330.1      | c.3474G>A  | p.E1158E       | silent           | M                 |
| 1022       | PD7281 | PV          | JAK2              | 20  | 45801371  | G        | T         | 51             | 0.0                        | 56           | 53.6                     | EYA2            | CCDS13403.1     | c.1054G>T  | p.A352S        | missense         | M                 |
| 1023       | PD7281 | PV          | JAK2              | 19  | 20727943  | G        | C         | 171            | 0.0                        | 171          | 52.1                     | ZNF737          | ENST00000344519 | c.1063C>G  | p.L355V        | missense         | M                 |
| 1024       | PD7281 | PV          | JAK2              | 2   | 220409562 | C        | T         | 42             | 0.0                        | 50           | 52.0                     | TMEM198         | CCDS33385.1     | c.113C>T   | p.P38L         | missense         | T                 |
| 1025       | PD7281 | PV          | JAK2              | 3   | 195498647 | T        | A         | 37             | 0.0                        | 36           | 50.0                     | MUC4            | CCDS3310.1      | c.410A>T   | p.Y137F        | missense         | M                 |
| 1026       | PD7281 | PV          | JAK2              | 2   | 136594655 | T        | C         | 109            | 0.0                        | 102          | 50.0                     | LCT             | CCDS2178.1      | c.85A>G    | p.I29V         | missense         | M                 |
| 1027       | PD7281 | PV          | JAK2              | 12  | 108589739 | G        | A         | 88             | 0.0                        | 85           | 48.2                     | WSCD2           | CCDS41828.1     | c.130G>A   | p.A44T         | missense         | M                 |
| 1028       | PD7281 | PV          | JAK2              | 17  | 45993985  | C        | T         | 28             | 0.0                        | 25           | 48.0                     | SP2             | CCDS11521.2     | c.548C>T   | p.P183L        | missense         | M                 |
| 1029       | PD7281 | PV          | JAK2              | 2   | 242524037 | T        | C         | 129            | 0.0                        | 105          | 47.6                     | THAP4           | CCDS2551.1      | c.1718A>G  | p.K573R        | missense         | T                 |
| 1030       | PD7281 | PV          | JAK2              | 6   | 129835661 | C        | T         | 110            | 0.0                        | 118          | 46.6                     | LAMA2           | CCDS5138.1      | c.9132C>T  | p.N3044N       | silent           | M                 |
| 1031       | PD7281 | PV          | JAK2              | 7   | 6150943   | C        | A         | 104            | 0.0                        | 110          | 46.4                     | USP42           | CCDS47535.1     | c.179C>A   | p.A60D         | missense         | M                 |
| 1032       | PD7281 | PV          | JAK2              | X   | 100086592 | G        | A         | 102            | 0.0                        | 96           | 44.8                     | CSTF2           | CCDS14473.1     | c.978G>A   | p.P326P        | silent           | M                 |
| 1033       | PD7281 | PV          | JAK2              | X   | 135443653 | A        | C         | 93             | 0.0                        | 100          | 43.0                     | GPR112          | CCDS35409.1     | c.7184A>C  | p.Y2395S       | missense         | M                 |
| 1034       | PD7281 | PV          | JAK2              | 18  | 44260149  | C        | T         | 59             | 0.0                        | 57           | 42.1                     | ST8SIA5         | CCDS11930.1     | c.987G>A   | p.S329S        | silent           | M                 |
| 1035       | PD7281 | PV          | JAK2              | 6   | 56475247  | C        | T         | 66             | 0.0                        | 69           | 36.2                     | DST             | CCDS47441.1     | c.5162G>A  | p.G1721E       | missense         | M                 |
| 1036       | PD7281 | PV          | JAK2              | 1   | 162381753 | C        | T         | 63             | 0.0                        | 91           | 31.9                     | SH2D1B          | CCDS30928.1     | c.54G>A    | p.L18L         | silent           | M                 |
| 1037       | PD7281 | PV          | JAK2              | 16  | 53404748  | C        | T         | 53             | 0.0                        | 54           | 29.6                     | ENSG00000236139 | ENST00000416703 | c.547G>A   | p.G183R        | missense         | M                 |
| 1038       | PD7281 | PV          | JAK2              | 5   | 884052    | C        | T         | 44             | 0.0                        | 37           | 27.0                     | BRD9            | CCDS34127.1     | c.678+1G>A | p.?            | essential splice | M                 |

| Variant No | PDID   | MPN Subtype | JAK2/MPL mutation | Chr | Position  | Ref base | Mut base | Germline reads | Germline allele burden (%) | Tumour reads | Tumour allele burden (%) | Gene            | CCDS            | DNA Change      | Protein Change | Type of Change   | Validation Method |
|------------|--------|-------------|-------------------|-----|-----------|----------|----------|----------------|----------------------------|--------------|--------------------------|-----------------|-----------------|-----------------|----------------|------------------|-------------------|
| 1039       | PD7281 | PV          | JAK2              | 16  | 1837704   | G        | A        | 61             | 0.0                        | 57           | 22.8                     | NUBP2           | CCDS10445.1     | c.361G>A        | p.V121M        | missense         | M                 |
| 1040       | PD7281 | PV          | JAK2              | 2   | 42553332  | T        | C        | 269            | 0.0                        | 272          | 15.4                     | EML4            | CCDS1807.1      | c.2281T>C       | p.S761P        | missense         | M                 |
| 1041       | PD7281 | PV          | JAK2              | X   | 123185054 | T        | A        | 89             | 0.0                        | 56           | 14.3                     | STAG2           | CCDS43990.1     | c.1101T>A       | p.F367L        | missense         | M                 |
| 1042       | PD7281 | PV          | JAK2              | 11  | 113857734 | C        | T        | 43             | 0.0                        | 42           | 14.3                     | HTR3A           | CCDS8366.1      | c.1200C>T       | p.A400A        | silent           | M                 |
| 1043       | PD7281 | PV          | JAK2              | 7   | 129037063 | G        | A        | 31             | 0.0                        | 38           | 13.2                     | AHCYL2          | CCDS5812.1      | c.721G>A        | p.V241M        | missense         | M                 |
| 1044       | PD7281 | PV          | JAK2              | 3   | 57898950  | G        | T        | 79             | 0.0                        | 94           | 12.8                     | SLMAP           | CCDS33774.1     | c.1984G>T       | p.E662*        | nonsense         | M                 |
| 1045       | PD7281 | PV          | JAK2              | 19  | 37903967  | G        | A        | 110            | 0.0                        | 99           | 12.1                     | ZNF569          | CCDS12503.1     | c.1593C>T       | p.F531F        | silent           | T                 |
| 1046       | PD7281 | PV          | JAK2              | 5   | 55247394  | A        | C        | 101            | 0.0                        | 81           | 8.6                      | IL6ST           | CCDS3971.1      | c.1738T>G       | p.S580A        | missense         | M                 |
| 1047       | PD7394 | PET-MF      | MPL               | 6   | 135510928 | G        | C        | 120            | 6.7                        | 316          | 26.6                     | MYB             | CCDS47481.1     | c.214-1G>C      | p.?            | essential splice | T                 |
| 1048       | PD7394 | PET-MF      | MPL               | 17  | 39191011  | G        | C        | 50             | 0.0                        | 105          | 9.5                      | KRTAP1-3        | CCDS42323.1     | c.63C>G         | p.G21G         | silent           | T                 |
| 1049       | PD7394 | PET-MF      | MPL               | 1   | 43818310  | G        | A        | 35             | 2.9                        | 64           | 9.4                      | MPL             | CCDS483.1       | c.1775G>A       | p.R592Q        | missense         | T                 |
| 1050       | PD7394 | PET-MF      | MPL               | 1   | 208206700 | C        | T        | 28             | 3.6                        | 103          | 8.7                      | PLXNA2          | CCDS31013.1     | c.5019G>A       | p.V1673V       | silent           | T                 |
| 1051       | PD7394 | PET-MF      | MPL               | X   | 118717178 | G        | C        | 99             | 3.0                        | 237          | 6.3                      | UBE2A           | CCDS14580.1     | c.419G>C        | p.R140P        | missense         | T                 |
| 1052       | PD7395 | PV          | JAK2              | 9   | 5073770   | G        | T        | 159            | 1.3                        | 185          | 46.5                     | JAK2            | CCDS6457.1      | c.1849G>T       | p.V617F        | missense         | T                 |
| 1053       | PD7395 | PV          | JAK2              | 16  | 86544980  | G        | A        | 11             | 0.0                        | 22           | 31.8                     | FOXF1           | CCDS10957.2     | c.805G>A        | p.A269T        | missense         | T                 |
| 1054       | PD7395 | PV          | JAK2              | 16  | 2813025   | A        | G        | 472            | 0.9                        | 398          | 24.1                     | SRRM2           | CCDS32373.1     | c.2496A>G       | p.R832R        | silent           | T                 |
| 1055       | PD7395 | PV          | JAK2              | 1   | 207039688 | T        | A        | 221            | 0.5                        | 226          | 21.2                     | IL20            | CCDS1470.1      | c.204T>A        | p.T68T         | silent           | T                 |
| 1056       | PD7395 | PV          | JAK2              | 9   | 136577783 | A        | G        | 30             | 0.0                        | 53           | 20.8                     | SARDH           | CCDS6978.1      | c.1286T>C       | p.I429T        | missense         | T                 |
| 1057       | PD7395 | PV          | JAK2              | 2   | 73677832  | A        | C        | 122            | 1.6                        | 179          | 18.4                     | ALMS1           | CCDS42697.1     | c.4175A>C       | p.Q1392P       | missense         | T                 |
| 1058       | PD7395 | PV          | JAK2              | 16  | 18861780  | _        | insT     | 118            | 0.0                        | 133          | 18.0                     | SMG1            | CCDS45430.1     | c.5061_5062insA | p.I1688fs*7    | frameshift       | T                 |
| 1059       | PD7395 | PV          | JAK2              | X   | 32486696  | T        | A        | 90             | 1.1                        | 84           | 14.3                     | DMD             | CCDS14233.1     | c.3081A>T       | p.G1027G       | silent           | T                 |
| 1060       | PD7396 | MPN_u       | JAK2              | 9   | 5073770   | G        | T        | 185            | 0.0                        | 65           | 23.1                     | JAK2            | CCDS6457.1      | c.1849G>T       | p.V617F        | missense         | T                 |
| 1061       | PD7396 | MPN_u       | JAK2              | 6   | 39838188  | C        | T        | 105            | 0.0                        | 167          | 9.0                      | DAAM2           | ENST00000398904 | c.946C>T        | p.L316F        | missense         | T                 |
| 1062       | PD7396 | MPN_u       | JAK2              | 20  | 37153481  | G        | A        | 196            | 0.0                        | 125          | 8.8                      | RALGAPB         | CCDS13305.1     | c.1680G>A       | p.L560L        | silent           | T                 |
| 1063       | PD7396 | MPN_u       | JAK2              | 3   | 10359778  | C        | A        | 50             | 0.0                        | 76           | 6.6                      | SEC13           | CCDS2599.1      | c.4G>T          | p.V2L          | missense         | T                 |
| 1064       | PD7397 | PV          | JAK2              | 9   | 5073770   | G        | T        | 187            | 1.6                        | 176          | 63.6                     | JAK2            | CCDS6457.1      | c.1849G>T       | p.V617F        | missense         | T                 |
| 1065       | PD7397 | PV          | JAK2              | 9   | 112144048 | C        | T        | 70             | 0.0                        | 65           | 40.0                     | PTPN3           | CCDS6776.1      | c.2548G>A       | p.G850S        | missense         | T                 |
| 1066       | PD7397 | PV          | JAK2              | 17  | 39464493  | C        | T        | 40             | 2.5                        | 53           | 34.0                     | KRTAP16-1       | ENST00000391352 | c.1013G>A       | p.R338H        | missense         | T                 |
| 1067       | PD7397 | PV          | JAK2              | 3   | 1415683   | G        | A        | 164            | 0.6                        | 110          | 33.6                     | CNTN6           | CCDS2557.1      | c.2021G>A       | p.R674H        | missense         | T                 |
| 1068       | PD7397 | PV          | JAK2              | 2   | 219695533 | G        | T        | 89             | 0.0                        | 102          | 28.4                     | PRKAG3          | CCDS2424.1      | c.165C>A        | p.A55A         | silent           | T                 |
| 1069       | PD7397 | PV          | JAK2              | 19  | 49703901  | G        | A        | 49             | 0.0                        | 58           | 24.1                     | TRPM4           | CCDS33073.1     | c.2812G>A       | p.G938S        | missense         | T                 |
| 1070       | PD7397 | PV          | JAK2              | 3   | 54922025  | T        | G        | 198            | 0.5                        | 152          | 21.7                     | CACNA2D3        | ENST00000474759 | c.2096T>G       | p.V699G        | missense         | T                 |
| 1071       | PD7397 | PV          | JAK2              | 3   | 125295185 | T        | C        | 87             | 0.0                        | 76           | 21.1                     | OSBPL11         | CCDS3033.1      | c.514A>G        | p.S172G        | missense         | T                 |
| 1072       | PD7397 | PV          | JAK2              | 1   | 99772258  | G        | A        | 49             | 0.0                        | 54           | 20.4                     | ENSG00000117600 | CCDS757.1       | c.1984G>A       | p.E662K        | missense         | T                 |
| 1073       | PD7397 | PV          | JAK2              | 7   | 92098285  | G        | A        | 89             | 0.0                        | 83           | 19.3                     | ERVWE1          | ENST00000493463 | c.1411C>T       | p.L471F        | missense         | T                 |
| 1074       | PD7397 | PV          | JAK2              | 1   | 44159715  | A        | G        | 64             | 0.0                        | 51           | 15.7                     | KDM4A           | CCDS491.1       | c.2426A>G       | p.N809S        | missense         | T                 |
| 1075       | PD7397 | PV          | JAK2              | 4   | 187524079 | G        | A        | 168            | 0.0                        | 214          | 5.6                      | FAT1            | CCDS47177.1     | c.11460C>T      | p.S3820S       | silent           | T                 |
| 1076       | PD7397 | PV          | JAK2              | 9   | 113171090 | A        | T        | 235            | 0.4                        | 332          | 4.5                      | SVEP1           | CCDS48004.1     | c.6790T>A       | p.C2264S       | missense         | T                 |
| 1077       | PD7398 | ET          | JAK2              | 9   | 5073770   | G        | T        | 138            | 2.1                        | 166          | 68.7                     | JAK2            | CCDS6457.1      | c.1849G>T       | p.V617F        | missense         | M                 |
| 1078       | PD7398 | ET          | JAK2              | 1   | 33944913  | A        | C        | 100            | 1.0                        | 89           | 50.6                     | ZSCAN20         | CCDS41300.1     | c.24A>C         | p.Q8H          | missense         | M                 |
| 1079       | PD7398 | ET          | JAK2              | 3   | 56115005  | G        | A        | 82             | 2.4                        | 131          | 50.4                     | ERC2            | CCDS46851.1     | c.1481C>T       | p.A494V        | missense         | M                 |
| 1080       | PD7398 | ET          | JAK2              | 1   | 50941357  | G        | A        | 28             | 0.0                        | 28           | 50.0                     | FAF1            | CCDS554.1       | c.1654-6C>T     | p.?            | splice           | M                 |
| 1081       | PD7398 | ET          | JAK2              | 3   | 124351541 | C        | T        | 115            | 0.0                        | 132          | 47.7                     | KALRN           | CCDS3028.1      | c.360C>T        | p.S120S        | silent           | M                 |
| 1082       | PD7398 | ET          | JAK2              | 15  | 90631934  | C        | T        | 87             | 5.8                        | 77           | 46.8                     | IDH2            | CCDS10359.1     | c.419G>A        | p.R140Q        | missense         | T                 |
| 1083       | PD7398 | ET          | JAK2              | 6   | 160679401 | G        | A        | 134            | 0.0                        | 98           | 43.9                     | SLC22A2         | CCDS5276.1      | c.389C>T        | p.T130M        | missense         | T                 |
| 1084       | PD7398 | ET          | JAK2              | 17  | 76166929  | A        | G        | 95             | 1.1                        | 140          | 43.6                     | SYNR2           | CCDS11753.1     | c.131A>G        | p.Y44C         | missense         | M                 |
| 1085       | PD7398 | ET          | JAK2              | 2   | 87013080  | G        | T        | 234            | 1.7                        | 228          | 42.1                     | CDBA            | CCDS1992.1      | c.671C>A        | p.S224*        | nonsense         | T                 |
| 1086       | PD7398 | ET          | JAK2              | 10  | 135204920 | G        | A        | 27             | 0.0                        | 49           | 38.8                     | PAOX            | CCDS7682.1      | c.1339G>A       | p.V447M        | missense         | T                 |
| 1087       | PD7398 | ET          | JAK2              | 12  | 88440625  | C        | A        | 155            | 0.0                        | 106          | 38.7                     | C12orf29        | CCDS31866.1     | c.661C>A        | p.H221N        | missense         | M                 |
| 1088       | PD7398 | ET          | JAK2              | 5   | 140431959 | C        | T        | 83             | 1.2                        | 107          | 37.4                     | PCDH11          | CCDS4243.1      | c.904C>T        | p.R302*        | nonsense         | M                 |
| 1089       | PD7398 | ET          | JAK2              | 14  | 74824762  | C        | T        | 61             | 0.0                        | 81           | 14.8                     | C14orf115       | CCDS9830.1      | c.1276C>T       | p.R426C        | missense         | M                 |
| 1090       | PD7399 | PV          | JAK2              | 9   | 5073770   | G        | T        | 135            | 7.4                        | 198          | 28.8                     | JAK2            | CCDS6457.1      | c.1849G>T       | p.V617F        | missense         | T                 |

| Variant No | PDID   | MPN Subtype | JAK2/MPL mutation | Chr | Position  | Ref base | Mut base | Germline reads | Germline allele burden (%) | Tumour reads | Tumour allele burden (%) | Gene     | CCDS            | DNA Change | Protein Change | Type of Change | Validation Method |
|------------|--------|-------------|-------------------|-----|-----------|----------|----------|----------------|----------------------------|--------------|--------------------------|----------|-----------------|------------|----------------|----------------|-------------------|
| 1091       | PD7399 | PV          | JAK2              | 11  | 66190678  | C        | T        | 11             | 0.0                        | 21           | 28.6                     | NPAS4    | CCDS8138.1      | c.783C>T   | p.H261H        | silent         | T                 |
| 1092       | PD7399 | PV          | JAK2              | 13  | 52991208  | G        | A        | 45             | 4.4                        | 59           | 22.0                     | VPS36    | CCDS9434.1      | c.974C>T   | p.A325V        | missense       | T                 |
| 1093       | PD7399 | PV          | JAK2              | 17  | 76832207  | G        | A        | 62             | 4.8                        | 78           | 21.8                     | USP36    | CCDS32755.1     | c.239C>T   | p.P80L         | missense       | T                 |
| 1094       | PD7399 | PV          | JAK2              | 6   | 42141493  | C        | A        | 152            | 4.0                        | 187          | 21.4                     | GUCA1A   | CCDS4864.1      | c.142C>A   | p.L48M         | missense       | T                 |
| 1095       | PD7399 | PV          | JAK2              | 5   | 13829681  | C        | T        | 149            | 6.0                        | 137          | 19.0                     | DNAH5    | CCDS3882.1      | c.6382G>A  | p.V2128I       | missense       | T                 |
| 1096       | PD7399 | PV          | JAK2              | 6   | 76558241  | C        | T        | 101            | 6.9                        | 120          | 18.3                     | MYO6     | CCDS34487.1     | c.1071C>T  | p.S357S        | silent         | T                 |
| 1097       | PD7399 | PV          | JAK2              | 1   | 222902998 | G        | T        | 98             | 1.0                        | 88           | 17.1                     | C1orf58  | CCDS1534.1      | c.793G>T   | p.D265Y        | missense       | T                 |
| 1098       | PD7399 | PV          | JAK2              | 3   | 189587194 | C        | A        | 104            | 5.8                        | 90           | 16.7                     | TP63     | CCDS3293.1      | c.1211C>A  | p.P404Q        | missense       | T                 |
| 1099       | PD7399 | PV          | JAK2              | 11  | 4881667   | C        | T        | 274            | 2.9                        | 161          | 15.5                     | OR51H1P  | ENST00000322059 | c.128G>A   | p.G43E         | missense       | T                 |
| 1100       | PD7399 | PV          | JAK2              | 7   | 116937852 | C        | T        | 198            | 2.5                        | 152          | 14.5                     | WNT2     | CCDS5771.1      | c.667G>A   | p.A223T        | missense       | T                 |
| 1101       | PD7399 | PV          | JAK2              | 17  | 45232056  | G        | C        | 147            | 2.0                        | 143          | 13.3                     | CDC27    | CCDS45720.1     | c.939C>G   | p.T313T        | silent         | T                 |
| 1102       | PD7399 | PV          | JAK2              | 17  | 11833352  | A        | G        | 58             | 1.7                        | 42           | 11.9                     | DNAH9    | CCDS11160.1     | c.12047A>G | p.N4016S       | missense       | T                 |
| 1103       | PD7399 | PV          | JAK2              | 10  | 105906091 | G        | T        | 73             | 2.7                        | 120          | 11.7                     | C10orf79 | CCDS31281.1     | c.3785C>A  | p.A1262D       | missense       | T                 |
| 1104       | PD7399 | PV          | JAK2              | 4   | 39905790  | T        | C        | 116            | 4.3                        | 193          | 8.8                      | PDS5A    | CCDS47045.1     | c.1255A>G  | p.M419V        | missense       | T                 |
| 1105       | PD7399 | PV          | JAK2              | 3   | 40231666  | C        | T        | 35             | 2.9                        | 70           | 8.6                      | MYRIP    | CCDS2689.1      | c.1377C>T  | p.S459S        | silent         | T                 |
| 1106       | PD7400 | PV          | JAK2              | 9   | 5073770   | G        | T        | 147            | 1.3                        | 199          | 9.1                      | JAK2     | CCDS6457.1      | c.1849G>T  | p.V617F        | missense       | T                 |
| 1107       | PD7400 | PV          | JAK2              | 1   | 55349366  | G        | A        | 130            | 0.0                        | 169          | 8.9                      | DHCR24   | CCDS600.1       | c.312C>T   | p.V104V        | silent         | T                 |
| 1108       | PD7400 | PV          | JAK2              | 11  | 6262735   | G        | T        | 209            | 3.4                        | 149          | 8.1                      | CNGA4    | CCDS31408.1     | c.992G>T   | p.R331L        | missense       | T                 |
| 1109       | PD7436 | ET          | JAK2              | 7   | 48411838  | C        | T        | 402            | 0.3                        | 250          | 24.0                     | ABCA13   | CCDS47584.1     | c.10877C>T | p.T3626I       | missense       | T                 |
| 1110       | PD7436 | ET          | JAK2              | 7   | 43591845  | G        | A        | 221            | 0.0                        | 105          | 21.9                     | HECW1    | CCDS5469.2      | c.4420G>A  | p.V1474M       | missense       | T                 |
| 1111       | PD7436 | ET          | JAK2              | 4   | 56473507  | A        | G        | 47             | 2.1                        | 69           | 21.7                     | NMU      | CCDS3501.1      | c.318T>C   | p.F106F        | silent         | T                 |
| 1112       | PD7436 | ET          | JAK2              | 4   | 125590313 | C        | A        | 283            | 0.0                        | 229          | 21.4                     | ANKRD50  | CCDS34060.1     | c.4119G>T  | p.Q1373H       | missense       | T                 |
| 1113       | PD7436 | ET          | JAK2              | 22  | 32828527  | C        | G        | 43             | 0.0                        | 80           | 21.3                     | BPIL2    | CCDS13906.1     | c.982G>C   | p.A328P        | missense       | T                 |
| 1114       | PD7436 | ET          | JAK2              | 15  | 45848048  | C        | T        | 302            | 1.0                        | 265          | 21.1                     | C15orf21 | ENST00000396645 | c.398C>T   | p.A133V        | missense       | T                 |
| 1115       | PD7436 | ET          | JAK2              | 16  | 20548587  | G        | A        | 500            | 0.0                        | 418          | 21.1                     | ACSM2B   | CCDS10586.1     | c.1727C>T  | p.A576V        | missense       | T                 |
| 1116       | PD7436 | ET          | JAK2              | 13  | 114542721 | C        | T        | 27             | 0.0                        | 38           | 21.1                     | GAS6     | CCDS45072.1     | c.446G>A   | p.G149E        | missense       | T                 |
| 1117       | PD7436 | ET          | JAK2              | X   | 114425813 | T        | A        | 12             | 0.0                        | 15           | 20.0                     | RBMXL3   | ENST00000424776 | c.1809T>A  | p.S603R        | missense       | T                 |
| 1118       | PD7436 | ET          | JAK2              | 3   | 52786237  | G        | A        | 318            | 0.0                        | 363          | 19.8                     | NEK4     | CCDS2863.1      | c.1079C>T  | p.A360V        | missense       | T                 |
| 1119       | PD7436 | ET          | JAK2              | 2   | 26257516  | C        | T        | 47             | 0.0                        | 94           | 19.2                     | RAB10    | CCDS1720.1      | c.39C>T    | p.L13L         | silent         | T                 |
| 1120       | PD7436 | ET          | JAK2              | 12  | 6806545   | T        | C        | 37             | 0.0                        | 42           | 19.1                     | C12orf53 | CCDS44818.1     | c.431A>G   | p.N144S        | missense       | T                 |
| 1121       | PD7436 | ET          | JAK2              | 8   | 23106826  | C        | G        | 29             | 0.0                        | 32           | 18.8                     | CHMP7    | CCDS6040.1      | c.403C>G   | p.L135V        | missense       | T                 |
| 1122       | PD7436 | ET          | JAK2              | 6   | 84056052  | G        | A        | 38             | 5.3                        | 65           | 18.5                     | ME1      | CCDS34492.1     | c.440C>T   | p.A147V        | missense       | T                 |
| 1123       | PD7436 | ET          | JAK2              | 2   | 206592724 | C        | A        | 46             | 2.2                        | 65           | 18.5                     | NRP2     | CCDS2364.1      | c.1100C>A  | p.T367N        | missense       | T                 |
| 1124       | PD7436 | ET          | JAK2              | 7   | 2594058   | G        | C        | 18             | 0.0                        | 28           | 17.9                     | C7orf27  | CCDS5334.1      | c.8C>G     | p.P3R          | missense       | T                 |
| 1125       | PD7436 | ET          | JAK2              | 12  | 59307770  | G        | T        | 49             | 0.0                        | 68           | 17.7                     | LRIG3    | CCDS8960.1      | c.376C>A   | p.L126I        | missense       | T                 |
| 1126       | PD7436 | ET          | JAK2              | 2   | 44553960  | C        | A        | 116            | 1.7                        | 140          | 17.1                     | PREPL    | CCDS33190.1     | c.1637G>T  | p.G546V        | missense       | T                 |
| 1127       | PD7436 | ET          | JAK2              | 2   | 25457242  | C        | T        | 42             | 0.0                        | 30           | 16.7                     | DNMT3A   | CCDS33157.1     | c.2645G>A  | p.R882H        | missense       | T C               |
| 1128       | PD7436 | ET          | JAK2              | 7   | 99695778  | G        | A        | 20             | 0.0                        | 36           | 16.7                     | MCM7     | CCDS5683.1      | c.856C>T   | p.R286*        | nonsense       | T                 |
| 1129       | PD7436 | ET          | JAK2              | X   | 41598667  | A        | G        | 328            | 0.3                        | 142          | 16.2                     | CASK     | CCDS14257.1     | c.399T>C   | p.H133H        | silent         | T                 |
| 1130       | PD7436 | ET          | JAK2              | 1   | 197071594 | G        | A        | 144            | 0.0                        | 190          | 15.3                     | ASPM     | CCDS1389.1      | c.6787C>T  | p.H2263Y       | missense       | T                 |
| 1131       | PD7436 | ET          | JAK2              | 1   | 248129264 | G        | T        | 40             | 0.0                        | 59           | 15.3                     | OR2AK2   | CCDS31102.1     | c.631G>T   | p.E211*        | nonsense       | T                 |
| 1132       | PD7436 | ET          | JAK2              | 10  | 82126661  | A        | C        | 265            | 0.0                        | 337          | 15.1                     | DYDC2    | CCDS7367.1      | c.488A>C   | p.H163P        | missense       | T                 |
| 1133       | PD7436 | ET          | JAK2              | 5   | 142662140 | A        | G        | 80             | 0.0                        | 110          | 14.6                     | NR3C1    | CCDS34258.1     | c.2177T>C  | p.M726T        | missense       | T                 |
| 1134       | PD7436 | ET          | JAK2              | 5   | 118525568 | A        | G        | 369            | 0.0                        | 249          | 14.1                     | DMXL1    | CCDS4125.1      | c.7301A>G  | p.Y2434C       | missense       | T                 |
| 1135       | PD7436 | ET          | JAK2              | 10  | 5969443   | C        | G        | 99             | 1.0                        | 105          | 13.3                     | FBXO18   | CCDS7073.1      | c.2921C>G  | p.T974S        | missense       | T                 |
| 1136       | PD7436 | ET          | JAK2              | 9   | 73479380  | G        | A        | 157            | 0.0                        | 148          | 12.2                     | TRPM3    | CCDS43835.1     | c.225C>T   | p.V75V         | silent         | T                 |
| 1137       | PD7436 | ET          | JAK2              | 10  | 73571109  | C        | T        | 26             | 0.0                        | 36           | 11.1                     | CDH23    | ENST00000398860 | c.9130C>T  | p.R3044W       | missense       | T                 |
| 1138       | PD7436 | ET          | JAK2              | 12  | 91396234  | A        | C        | 215            | 0.0                        | 155          | 5.2                      | EPYC     | CCDS31870.1     | c.109T>G   | p.L37V         | missense       | T                 |
| 1139       | PD7436 | ET          | JAK2              | 9   | 5073770   | G        | T        | 149            | 0.0                        | 147          | 0.7                      | JAK2     | CCDS6457.1      | c.1849G>T  | p.V617F        | missense       | T C               |
| 1140       | PD7437 | ET          | MPL               | 1   | 43815009  | G        | T        | 49             | 0.0                        | 56           | 39.3                     | MPL      | CCDS483.1       | c.1544G>T  | p.W515L        | missense       | T C               |
| 1141       | PD7437 | ET          | MPL               | 1   | 76378423  | G        | A        | 52             | 0.0                        | 67           | 37.3                     | MSH4     | CCDS670.1       | c.2662G>A  | p.V888M        | missense       | T C               |
| 1142       | PD7437 | ET          | MPL               | 2   | 217724631 | G        | A        | 158            | 0.0                        | 148          | 23.7                     | TNP1     | CCDS2406.1      | c.127C>T   | p.R43W         | missense       | T C               |



| Variant No | PDID   | MPN Subtype | JAK2/MPL mutation | Chr | Position  | Ref base | Mut base          | Germline reads | Germline allele burden (%) | Tumour reads | Tumour allele burden (%) | Gene            | CCDS            | DNA Change          | Protein Change   | Type of Change   | Validation Method |
|------------|--------|-------------|-------------------|-----|-----------|----------|-------------------|----------------|----------------------------|--------------|--------------------------|-----------------|-----------------|---------------------|------------------|------------------|-------------------|
| 1143       | PD7437 | ET          | MPL               | 16  | 31382405  | C        | T                 | 65             | 0.0                        | 103          | 20.4                     | ITGAX           | CCDS10711.1     | c.1711C>T           | p.R571W          | missense         | T C               |
| 1144       | PD7437 | ET          | MPL               | 2   | 128886594 | T        | C                 | 100            | 0.0                        | 222          | 19.8                     | UGGT1           | CCDS2154.1      | c.1227-9T>C         | p.?              | splice           | T C               |
| 1145       | PD7437 | ET          | MPL               | 3   | 10443892  | G        | A                 | 128            | 0.0                        | 265          | 18.9                     | ATP2B2          | CCDS33701.1     | c.538C>T            | p.R180W          | missense         | T C               |
| 1146       | PD7437 | ET          | MPL               | 5   | 55265528  | T        | G                 | 108            | 0.0                        | 117          | 18.0                     | IL6ST           | CCDS3971.1      | c.220A>C            | p.I74L           | missense         | T C               |
| 1147       | PD7437 | ET          | MPL               | 6   | 79668297  | C        | T                 | 59             | 0.0                        | 113          | 16.8                     | PHIP            | CCDS4987.1      | c.3677G>A           | p.W1226*         | nonsense         | T C               |
| 1148       | PD7437 | ET          | MPL               | 2   | 25457242  | C        | T                 | 30             | 0.0                        | 49           | 14.3                     | DNMT3A          | CCDS33157.1     | c.2645G>A           | p.R882H          | missense         | T C               |
| 1149       | PD7437 | ET          | MPL               | 1   | 215972270 | C        | G                 | 176            | 0.0                        | 71           | 12.7                     | USH2A           | CCDS31025.1     | c.9937G>C           | p.V3313L         | missense         | T C               |
| 1150       | PD7437 | ET          | MPL               | 6   | 124979623 | T        | G                 | 197            | 0.0                        | 205          | 4.9                      | NKAIN2          | ENST00000368416 | c.565T>G            | p.*189E          | nonstop          | T C               |
| 1151       | PD7438 | ET          | unmutated         | 12  | 133277885 | C        | T                 | 100            | 2.0                        | 186          | 41.4                     | PGAM5           | CCDS9279.1      | c.449C>T            | p.P150L          | missense         | T                 |
| 1152       | PD7438 | ET          | unmutated         | 6   | 46826302  | T        | C                 | 38             | 5.3                        | 87           | 40.2                     | GPR116          | CCDS4919.1      | c.3338A>G           | p.Y113C          | missense         | T                 |
| 1153       | PD7438 | ET          | unmutated         | 15  | 35083473  | C        | T                 | 102            | 2.0                        | 149          | 39.6                     | ACTC1           | CCDS10041.1     | c.832G>A            | p.E278K          | missense         | T                 |
| 1154       | PD7438 | ET          | unmutated         | X   | 17743974  | G        | A                 | 70             | 1.4                        | 70           | 24.3                     | NHS             | CCDS14181.1     | c.1685G>A           | p.R562H          | missense         | T                 |
| 1155       | PD7438 | ET          | unmutated         | 2   | 106739466 | T        | C                 | 183            | 1.1                        | 372          | 22.0                     | UXS1            | CCDS46378.1     | c.704A>G            | p.K235R          | missense         | T                 |
| 1156       | PD7438 | ET          | unmutated         | 10  | 69881306  | C        | T                 | 75             | 2.7                        | 95           | 12.6                     | MYPN            | CCDS7275.1      | c.111C>T            | p.P37P           | silent           | T                 |
| 1157       | PD7438 | ET          | unmutated         | 11  | 59626652  | C        | T                 | 177            | 0.0                        | 196          | 10.7                     | TCN1            | CCDS7978.1      | c.645G>A            | p.K215K          | silent           | T                 |
| 1158       | PD7438 | ET          | unmutated         | 14  | 58955535  | A        | C                 | 209            | 0.5                        | 243          | 4.1                      | KIAA0586        | CCDS45115.1     | c.3496A>C           | p.K1166Q         | missense         | T                 |
| 1159       | PD7438 | ET          | unmutated         | 19  | 13054569  | _        | delAGGCT<24>ACGCA | 15             | 0.0                        | 23           | 30.4                     | CALR            | CCDS12288.1     | c.1096_1129del34    | p.R366fs*53      | frameshift       | M T C             |
| 1160       | PD7440 | ET          | unmutated         | 13  | 23907724  | C        | T                 | 121.00         | 3.3                        | 139          | 21.6                     | SACS            | CCDS9300.2      | c.10291G>A          | p.V3431I         | missense         | M                 |
| 1161       | PD7440 | ET          | unmutated         | 10  | 85984824  | G        | A                 | 121.00         | 4.1                        | 182          | 21.4                     | LRIT2           | CCDS31234.1     | c.157C>T            | p.L53F           | missense         | M                 |
| 1162       | PD7440 | ET          | unmutated         | 11  | 6648209   | G        | A                 | 65.00          | 4.6                        | 97           | 19.6                     | DCHS1           | CCDS7771.1      | c.6061C>T           | p.R2021C         | missense         | M                 |
| 1163       | PD7440 | ET          | unmutated         | 1   | 10364041  | A        | G                 | 118            | 5.1                        | 137          | 19.0                     | KIF1B           | CCDS112.1       | c.2798A>G           | p.Q933R          | missense         | M                 |
| 1164       | PD7440 | ET          | unmutated         | 12  | 109998861 | G        | A                 | 35.00          | 0.0                        | 44           | 15.9                     | MMAB            | CCDS9131.1      | c.568C>T            | p.R190C          | missense         | M                 |
| 1165       | PD7440 | ET          | unmutated         | 7   | 100549502 | C        | T                 | 232.00         | 5.6                        | 271          | 15.1                     | ENSG00000228273 | ENST00000379458 | c.83C>T             | p.S28F           | missense         | M                 |
| 1166       | PD7440 | ET          | unmutated         | 5   | 140348426 | A        | G                 | 77.00          | 2.6                        | 104          | 14.4                     | PCDHAC2         | CCDS4242.1      | c.2075A>G           | p.Q692R          | missense         | M                 |
| 1167       | PD7440 | ET          | unmutated         | 12  | 70352300  | C        | T                 | 71.00          | 2.8                        | 59           | 8.5                      | C12orf28        | ENST00000299350 | c.817C>T            | p.R273C          | missense         | M                 |
| 1168       | PD7440 | ET          | unmutated         | 19  | 13054627  | _        | insTTGTC          | 11             | 0.0                        | 25           | 52.0                     | CALR            | CCDS12288.1     | c.1154_1155insTTGTC | p.K385fs*47      | frameshift       | M T C             |
| 1169       | PD7441 | ET          | unmutated         | 3   | 52027854  | _        | delCCTGG          | 4.00           | 0.0                        | 24           | 20.8                     | RPL29           | CCDS2845.1      | c.386_391delCCAAGG  | p.A129_K130delAK | inframe          | T                 |
| 1170       | PD7442 | ET          | unmutated         | 7   | 129939220 | C        | T                 | 123            | 0.0                        | 90           | 7.8                      | CPA4            | CCDS5818.1      | c.261C>G            | p.Y87Y           | silent           | T C               |
| 1171       | PD7442 | ET          | unmutated         | 19  | 13054627  | _        | insTTGTC          | 2              | 0.0                        | 25           | 24.0                     | CALR            | CCDS12288.1     | c.1154_1155insTTGTC | p.K385fs*47      | frameshift       | M T C             |
| 1172       | PD7443 | ET          | unmutated         | 19  | 13054565  | _        | delGCAGA<42>AGGAG | 23             | 0.0                        | 30           | 23.3                     | CALR            | CCDS12288.1     | c.1092_1143del52    | p.L367fs*46      | frameshift       | M T C             |
| 1173       | PD7443 | ET          | unmutated         | 20  | 42972021  | C        | T                 | 117            | 0.0                        | 87           | 25.3                     | R3HDM1          | CCDS13329.1     | c.385C>T            | p.R129W          | missense         | T                 |
| 1174       | PD7443 | ET          | unmutated         | 9   | 135203790 | T        | G                 | 279            | 0.0                        | 214          | 24.8                     | SETX            | CCDS6947.1      | c.3195A>C           | p.E1065D         | missense         | T                 |
| 1175       | PD7443 | ET          | unmutated         | 15  | 59506831  | G        | C                 | 363            | 0.3                        | 289          | 23.9                     | MYO1E           | CCDS32254.1     | c.1188+8C>G         | p.?              | splice           | T                 |
| 1176       | PD7443 | ET          | unmutated         | 19  | 50550026  | C        | T                 | 155            | 0.0                        | 104          | 23.1                     | ZNF473          | CCDS33077.1     | c.2326C>T           | p.H776Y          | missense         | T                 |
| 1177       | PD7443 | ET          | unmutated         | 4   | 84205996  | T        | A                 | 60             | 0.0                        | 68           | 22.1                     | COQ2            | ENST00000311469 | c.72A>T             | p.G24G           | silent           | T                 |
| 1178       | PD7443 | ET          | unmutated         | 1   | 40367080  | A        | G                 | 51             | 0.0                        | 55           | 21.8                     | MYCL1           | CCDS30682.1     | c.27T>C             | p.Y9Y            | silent           | T                 |
| 1179       | PD7443 | ET          | unmutated         | 2   | 145162549 | G        | A                 | 87             | 1.2                        | 57           | 21.1                     | ZEB2            | CCDS2186.1      | c.446C>T            | p.A149V          | missense         | T                 |
| 1180       | PD7443 | ET          | unmutated         | 18  | 10487660  | C        | T                 | 117            | 0.0                        | 92           | 20.7                     | APCDD1          | CCDS11849.1     | c.1170C>T           | p.C390C          | silent           | T                 |
| 1181       | PD7443 | ET          | unmutated         | 7   | 5257594   | G        | A                 | 399            | 0.0                        | 285          | 18.6                     | WIP12           | CCDS5339.1      | c.618G>A            | p.A206A          | silent           | T                 |
| 1182       | PD7443 | ET          | unmutated         | 19  | 47278828  | T        | C                 | 168            | 0.0                        | 140          | 18.6                     | SLC1A5          | CCDS12692.1     | c.1565A>G           | p.K522R          | missense         | T                 |
| 1183       | PD7443 | ET          | unmutated         | 17  | 1561620   | T        | C                 | 158            | 0.0                        | 138          | 11.6                     | PRPF8           | CCDS11010.1     | c.5432A>G           | p.N1811S         | missense         | T                 |
| 1184       | PD7443 | ET          | unmutated         | 11  | 18955840  | C        | G                 | 203            | 0.0                        | 211          | 10.9                     | MIRGPRX1        | CCDS7846.1      | c.492G>C            | p.L164L          | silent           | T                 |
| 1185       | PD8624 | PV          | JAK2              | X   | 12734270  | G        | A                 | 167            | 0.0                        | 157          | 92.4                     | FRMPD4          | CCDS35201.1     | c.1692G>A           | p.G564G          | silent           | T                 |
| 1186       | PD8624 | PV          | JAK2              | X   | 130420627 | C        | T                 | 78             | 0.0                        | 52           | 90.4                     | IGSF1           | CCDS14629.1     | c.22G>A             | p.E8K            | missense         | T                 |
| 1187       | PD8624 | PV          | JAK2              | 9   | 5073770   | G        | T                 | 191            | 0.0                        | 151          | 89.4                     | JAK2            | CCDS6457.1      | c.1849G>T           | p.V617F          | missense         | T                 |
| 1188       | PD8624 | PV          | JAK2              | 16  | 47345182  | C        | T                 | 55             | 0.0                        | 53           | 52.8                     | ITFG1           | CCDS10728.1     | c.1039G>A           | p.A347T          | missense         | T                 |
| 1189       | PD8624 | PV          | JAK2              | 5   | 98228280  | A        | G                 | 132            | 0.0                        | 101          | 45.5                     | CHD1            | CCDS34204.1     | c.2129T>C           | p.V710A          | missense         | T                 |
| 1190       | PD8624 | PV          | JAK2              | 8   | 143960835 | G        | A                 | 20             | 0.0                        | 33           | 45.5                     | CYP11B1         | ENST00000377675 | c.301C>T            | p.R101C          | missense         | T                 |
| 1191       | PD8624 | PV          | JAK2              | 5   | 70308219  | C        | T                 | 104            | 0.0                        | 98           | 42.9                     | ENSG00000249437 | CCDS4009.1      | c.524G>A            | p.G175E          | missense         | T                 |
| 1192       | PD8624 | PV          | JAK2              | 4   | 82369281  | A        | T                 | 234            | 0.0                        | 173          | 39.9                     | RASGEF1B        | CCDS34022.1     | c.596T>A            | p.I199N          | missense         | T                 |
| 1193       | PD8624 | PV          | JAK2              | 1   | 146751866 | T        | G                 | 193            | 0.0                        | 58           | 37.9                     | CHD1L           | CCDS927.1       | c.1705+2T>G         | p.?              | essential splice | T                 |
| 1194       | PD8624 | PV          | JAK2              | 16  | 2336765   | C        | T                 | 45             | 0.0                        | 78           | 29.5                     | ABCA3           | CCDS10466.1     | c.3208G>A           | p.A1070T         | missense         | T                 |

| Variant No | PDID   | MPN Subtype | JAK2/MPL mutation | Chr | Position  | Ref base | Mut base          | Germline reads | Germline allele burden (%) | Tumour reads | Tumour allele burden (%) | Gene     | CCDS            | DNA Change       | Protein Change | Type of Change   | Validation Method |
|------------|--------|-------------|-------------------|-----|-----------|----------|-------------------|----------------|----------------------------|--------------|--------------------------|----------|-----------------|------------------|----------------|------------------|-------------------|
| 1195       | PD8624 | PV          | JAK2              | 6   | 32015790  | C        | T                 | 20             | 0.0                        | 41           | 29.3                     | TNXB     | CCDS47407.1     | c.10040-1G>A     | p.?            | essential splice | T                 |
| 1196       | PD8625 | PV          | JAK2              | 9   | 5073770   | G        | T                 | 265            | 0.7                        | 173          | 31.2                     | JAK2     | CCDS6457.1      | c.1849G>T        | p.V617F        | missense         | T C               |
| 1197       | PD8625 | PV          | JAK2              | 8   | 26365706  | G        | A                 | 181            | 0.0                        | 95           | 17.9                     | PNMA2    | ENST00000494213 | c.566C>T         | p.T189M        | missense         | T C               |
| 1198       | PD8625 | PV          | JAK2              | X   | 65253670  | G        | A                 | 182            | 1.7                        | 90           | 13.3                     | VSIG4    | CCDS14383.1     | c.58C>T          | p.R20C         | missense         | T C               |
| 1199       | PD8625 | PV          | JAK2              | 5   | 422892    | C        | T                 | 26             | 0.0                        | 65           | 12.3                     | AHRR     | CCDS43297.1     | c.502C>T         | p.R168C        | missense         | T C               |
| 1200       | PD8625 | PV          | JAK2              | 4   | 47589194  | C        | G                 | 128            | 0.0                        | 129          | 8.5                      | ATP10D   | CCDS3476.1      | c.3912C>G        | p.I1303M       | missense         | T C               |
| 1201       | PD8625 | PV          | JAK2              | 9   | 113169278 | C        | T                 | 157            | 1.3                        | 228          | 8.3                      | SVEP1    | CCDS48004.1     | c.8602G>A        | p.A2868T       | missense         | T C               |
| 1202       | PD8625 | PV          | JAK2              | 2   | 228221829 | G        | A                 | 227            | 1.3                        | 142          | 5.6                      | MFF      | CCDS2465.1      | c.1025G>A        | p.R342H        | missense         | T C               |
| 1203       | PD8626 | PV          | JAK2              | 9   | 5073770   | G        | T                 | 201            | 1.5                        | 138          | 43.5                     | JAK2     | CCDS6457.1      | c.1849G>T        | p.V617F        | missense         | T                 |
| 1204       | PD8626 | PV          | JAK2              | 4   | 73942011  | T        | C                 | 59             | 0.0                        | 30           | 16.7                     | ANKRD17  | CCDS34004.1     | c.7753-4A>G      | p.?            | splice           | T                 |
| 1205       | PD8626 | PV          | JAK2              | 16  | 818666    | C        | A                 | 14             | 0.0                        | 36           | 11.1                     | MSLN     | CCDS32356.1     | c.1826C>A        | p.P609H        | missense         | T                 |
| 1206       | PD8628 | ET          | JAK2              | 15  | 91769745  | G        | C                 | 53             | 1.9                        | 38           | 42.1                     | SV2B     | CCDS10370.1     | c.252G>C         | p.R84S         | missense         | T                 |
| 1207       | PD8628 | ET          | JAK2              | 15  | 48539175  | G        | A                 | 500            | 8.8                        | 350          | 39.1                     | SLC12A1  | CCDS10129.2     | c.1522G>A        | p.A508T        | missense         | T                 |
| 1208       | PD8628 | ET          | JAK2              | 2   | 133538788 | G        | T                 | 64             | 1.6                        | 74           | 37.8                     | NCKAP5   | CCDS46418.1     | c.4886C>A        | p.A1629E       | missense         | T                 |
| 1209       | PD8628 | ET          | JAK2              | 19  | 33355032  | C        | T                 | 21             | 4.8                        | 34           | 35.3                     | SLC7A9   | CCDS12425.1     | c.448G>A         | p.V150I        | missense         | T                 |
| 1210       | PD8628 | ET          | JAK2              | 1   | 154680715 | G        | T                 | 500            | 4.2                        | 340          | 31.2                     | KCNN3    | CCDS30880.1     | c.1933C>A        | p.L645I        | missense         | T                 |
| 1211       | PD8628 | ET          | JAK2              | 9   | 5073770   | G        | T                 | 182            | 2.7                        | 142          | 27.5                     | JAK2     | CCDS6457.1      | c.1849G>T        | p.V617F        | missense         | T                 |
| 1212       | PD8628 | ET          | JAK2              | 5   | 138240097 | G        | A                 | 147            | 2.7                        | 84           | 27.4                     | CTNNA1   | CCDS34243.1     | c.1356G>A        | p.M452I        | missense         | T                 |
| 1213       | PD8628 | ET          | JAK2              | 4   | 41263917  | G        | A                 | 41             | 2.4                        | 44           | 27.3                     | UCHL1    | CCDS5295.1      | c.436G>A         | p.V146M        | missense         | T                 |
| 1214       | PD8628 | ET          | JAK2              | 15  | 57730653  | G        | A                 | 126            | 0.0                        | 130          | 23.1                     | CGNL1    | CCDS10161.1     | c.456G>A         | p.L152L        | silent           | T                 |
| 1215       | PD8628 | ET          | JAK2              | 1   | 169519234 | G        | A                 | 98             | 0.0                        | 81           | 18.5                     | F5       | CCDS1281.1      | c.1416C>T        | p.I472I        | silent           | T                 |
| 1216       | PD8628 | ET          | JAK2              | 10  | 50916646  | _        | insAGGG           | 161            | 0.0                        | 128          | 10.2                     | C10orf53 | CCDS31202.1     | c.457_458insAGGG | p.G153fs*37    | frameshift       | T                 |
| 1217       | PD8628 | ET          | JAK2              | 9   | 74526679  | G        | A                 | 246            | 1.2                        | 393          | 4.8                      | C9orf85  | CCDS6639.1      | c.29G>A          | p.R10H         | missense         | T                 |
| 1218       | PD8629 | ET          | JAK2              | 17  | 40871212  | A        | C                 | 245            | 0.4                        | 211          | 26.5                     | EZH1     | CCDS32659.1     | c.678T>G         | p.S226R        | missense         | T                 |
| 1219       | PD8629 | ET          | JAK2              | 18  | 19085865  | C        | T                 | 163            | 0.0                        | 160          | 26.3                     | GREB1L   | CCDS45836.1     | c.4323C>T        | p.H1441H       | silent           | T                 |
| 1220       | PD8629 | ET          | JAK2              | 2   | 236715959 | C        | T                 | 84             | 0.0                        | 112          | 24.1                     | AGAP1    | CCDS33408.1     | c.1034C>T        | p.A345V        | missense         | T                 |
| 1221       | PD8629 | ET          | JAK2              | 8   | 17814836  | T        | C                 | 500            | 0.0                        | 229          | 23.6                     | PCM1     | CCDS47812.1     | c.1710T>C        | p.S570S        | silent           | T                 |
| 1222       | PD8629 | ET          | JAK2              | 6   | 87967906  | C        | T                 | 78             | 0.0                        | 81           | 23.5                     | ZNF292   | CCDS47457.1     | c.4559C>T        | p.A1520V       | missense         | T                 |
| 1223       | PD8629 | ET          | JAK2              | 22  | 40704607  | G        | A                 | 191            | 0.0                        | 197          | 22.8                     | TNRC6B   | CCDS46713.1     | c.3882G>A        | p.E1294E       | silent           | T                 |
| 1224       | PD8629 | ET          | JAK2              | X   | 73963048  | G        | T                 | 159            | 0.0                        | 137          | 22.6                     | KIAA2022 | CCDS35337.1     | c.1344C>A        | p.I448I        | silent           | T                 |
| 1225       | PD8629 | ET          | JAK2              | X   | 71694531  | C        | T                 | 92             | 0.0                        | 106          | 21.7                     | HDAC8    | ENST00000373561 | c.787G>A         | p.A263T        | missense         | T                 |
| 1226       | PD8629 | ET          | JAK2              | 11  | 36297713  | C        | T                 | 35             | 0.0                        | 43           | 20.9                     | COMMD9   | CCDS7900.1      | c.430G>A         | p.V144I        | missense         | T                 |
| 1227       | PD8629 | ET          | JAK2              | 10  | 44112369  | C        | T                 | 43             | 0.0                        | 54           | 20.4                     | ZNF485   | CCDS7205.2      | c.878C>T         | p.T293I        | missense         | T                 |
| 1228       | PD8629 | ET          | JAK2              | 2   | 71839789  | C        | T                 | 93             | 0.0                        | 70           | 20.0                     | DYSF     | CCDS46328.1     | c.4240C>T        | p.L1414F       | missense         | T                 |
| 1229       | PD8629 | ET          | JAK2              | X   | 150345326 | G        | A                 | 192            | 0.0                        | 198          | 19.7                     | GPR50    | CCDS44012.1     | c.133G>A         | p.G45S         | missense         | T                 |
| 1230       | PD8629 | ET          | JAK2              | 5   | 54619984  | C        | G                 | 54             | 0.0                        | 36           | 19.4                     | SKIV2L2  | CCDS3967.1      | c.297C>G         | p.V99V         | silent           | T                 |
| 1231       | PD8629 | ET          | JAK2              | 6   | 12120176  | C        | T                 | 500            | 0.2                        | 321          | 17.5                     | HIVEP1   | CCDS43426.1     | c.148C>T         | p.R50C         | missense         | T                 |
| 1232       | PD8629 | ET          | JAK2              | 9   | 5073770   | G        | T                 | 202            | 0.5                        | 92           | 17.4                     | JAK2     | CCDS6457.1      | c.1849G>T        | p.V617F        | missense         | T                 |
| 1233       | PD8629 | ET          | JAK2              | 1   | 207648508 | G        | A                 | 85             | 0.0                        | 69           | 17.4                     | CR2      | CCDS31007.1     | c.2663G>A        | p.R888K        | missense         | T                 |
| 1234       | PD8629 | ET          | JAK2              | 18  | 77893846  | _        | delAACTC<10>CTAAG | 68             | 0.0                        | 52           | 17.3                     | ADNP2    | CCDS32853.1     | c.550_569del20   | p.S185fs*0     | frameshift       | T                 |
| 1235       | PD8629 | ET          | JAK2              | 14  | 95670757  | G        | A                 | 110            | 0.0                        | 106          | 16.0                     | CLMN     | CCDS9933.1      | c.929C>T         | p.T310I        | missense         | T                 |
| 1236       | PD8629 | ET          | JAK2              | 5   | 79032617  | _        | delAG             | 368            | 0.0                        | 271          | 5.9                      | CMYA5    | CCDS47238.1     | c.8029_8030delAG | p.E2678fs*36   | frameshift       | T                 |
| 1237       | PD8630 | PV          | JAK2              | 4   | 106157653 | G        | T                 | 89             | 6.3                        | 79           | 32.9                     | TET2     | CCDS47120.1     | c.2554G>T        | p.E852*        | nonsense         | T                 |
| 1238       | PD8630 | PV          | JAK2              | 12  | 55969008  | G        | A                 | 147            | 4.1                        | 137          | 30.7                     | OR2AP1   | ENST00000321688 | c.810G>A         | p.K270K        | silent           | T                 |
| 1239       | PD8630 | PV          | JAK2              | 1   | 11115942  | G        | T                 | 13             | 0.0                        | 10           | 30.0                     | SRM      | CCDS125.1       | c.661C>A         | p.R221R        | silent           | T                 |
| 1240       | PD8630 | PV          | JAK2              | 9   | 5073770   | G        | T                 | 200            | 0.0                        | 165          | 24.2                     | JAK2     | CCDS6457.1      | c.1849G>T        | p.V617F        | missense         | T                 |
| 1241       | PD8630 | PV          | JAK2              | 12  | 49691801  | T        | C                 | 42             | 4.8                        | 33           | 15.2                     | PRPH     | CCDS8783.1      | c.1328T>C        | p.I443T        | missense         | T                 |
| 1242       | PD8630 | PV          | JAK2              | 3   | 168834115 | T        | C                 | 160            | 0.6                        | 149          | 14.8                     | MECOM    | CCDS3205.1      | c.981A>G         | p.L327L        | silent           | T                 |
| 1243       | PD8630 | PV          | JAK2              | 3   | 58149042  | G        | A                 | 29             | 3.5                        | 44           | 13.6                     | FLNB     | CCDS2885.1      | c.7183G>A        | p.E2395K       | missense         | T                 |
| 1244       | PD8630 | PV          | JAK2              | 12  | 101799685 | C        | T                 | 73             | 0.0                        | 67           | 11.9                     | ARL1     | CCDS44958.1     | c.79G>A          | p.G27R         | missense         | T                 |
| 1245       | PD8630 | PV          | JAK2              | 19  | 46733615  | G        | T                 | 211            | 1.0                        | 185          | 11.9                     | IGFL1    | CCDS46123.1     | c.164G>T         | p.C55F         | missense         | T                 |
| 1246       | PD8630 | PV          | JAK2              | 1   | 150776560 | G        | A                 | 260            | 0.0                        | 183          | 10.9                     | CTSK     | CCDS969.1       | c.555C>T         | p.A185A        | silent           | T                 |

| Variant No | PDID   | MPN Subtype | JAK2/MPL mutation | Chr | Position  | Ref base | Mut base          | Germline reads | Germline allele burden (%) | Tumour reads | Tumour allele burden (%) | Gene            | CCDS            | DNA Change                | Protein Change        | Type of Change   | Validation Method |
|------------|--------|-------------|-------------------|-----|-----------|----------|-------------------|----------------|----------------------------|--------------|--------------------------|-----------------|-----------------|---------------------------|-----------------------|------------------|-------------------|
| 1247       | PD8630 | PV          | JAK2              | 11  | 63486810  | C        | A                 | 103            | 3.9                        | 111          | 10.8                     | RTN3            | CCDS8050.1      | c.779C>A                  | p.T260N               | missense         | T                 |
| 1248       | PD8630 | PV          | JAK2              | 3   | 132360937 | G        | A                 | 144            | 0.0                        | 128          | 8.6                      | ACAD11          | CCDS3074.1      | c.416C>T                  | p.P139L               | missense         | T                 |
| 1249       | PD8630 | PV          | JAK2              | 1   | 155921296 | T        | C                 | 103            | 1.9                        | 75           | 8.0                      | ARHGGEF2        | CCDS1125.1      | c.2153A>G                 | p.Y718C               | missense         | T                 |
| 1250       | PD8630 | PV          | JAK2              | 7   | 149480728 | G        | A                 | 90             | 0.0                        | 80           | 7.5                      | SSPO            | ENST00000378016 | c.2434G>A                 | p.G812S               | missense         | T                 |
| 1251       | PD8630 | PV          | JAK2              | 5   | 140181545 | G        | A                 | 63             | 0.0                        | 81           | 7.4                      | PCDHA3          | CCDS34248.1     | c.763G>A                  | p.A255T               | missense         | T                 |
| 1252       | PD8630 | PV          | JAK2              | 4   | 106158509 | G        | A                 | 176            | 0.6                        | 123          | 7.3                      | TET2            | CCDS47120.1     | c.3409+1G>A               | p.?                   | essential splice | T                 |
| 1253       | PD8630 | PV          | JAK2              | 11  | 56237766  | A        | T                 | 126            | 0.0                        | 131          | 5.3                      | OR5M3           | CCDS31532.1     | c.208T>A                  | p.W70R                | missense         | T                 |
| 1254       | PD8630 | PV          | JAK2              | 15  | 43438717  | G        | A                 | 343            | 0.0                        | 302          | 5.0                      | TMEM62          | CCDS32210.1     | c.503G>A                  | p.G168D               | missense         | T                 |
| 1255       | PD8631 | PV          | JAK2              | 9   | 5073770   | G        | T                 | 114            | 0.0                        | 117          | 36.8                     | JAK2            | CCDS6457.1      | c.1849G>T                 | p.V617F               | missense         | T                 |
| 1256       | PD8631 | PV          | JAK2              | 10  | 118310706 | G        | A                 | 36             | 0.0                        | 63           | 20.6                     | PNLIP           | CCDS7594.1      | c.421G>A                  | p.V141M               | missense         | T                 |
| 1257       | PD8631 | PV          | JAK2              | 15  | 49308749  | G        | C                 | 119            | 0.0                        | 98           | 19.4                     | SECISBP2L       | CCDS32234.1     | c.1426+8C>G               | p.?                   | splice           | T                 |
| 1258       | PD8631 | PV          | JAK2              | 4   | 71099842  | C        | T                 | 207            | 0.0                        | 190          | 17.4                     | C4orf7          | CCDS3537.1      | c.196C>T                  | p.R66C                | missense         | T                 |
| 1259       | PD8631 | PV          | JAK2              | 11  | 9871702   | A        | C                 | 122            | 0.0                        | 151          | 15.9                     | SBF2            | CCDS31427.1     | c.2674T>G                 | p.L892V               | missense         | T                 |
| 1260       | PD8631 | PV          | JAK2              | 1   | 197111833 | C        | G                 | 288            | 0.0                        | 220          | 14.6                     | ASPM            | CCDS1389.1      | c.1549G>C                 | p.A517P               | missense         | T                 |
| 1261       | PD8631 | PV          | JAK2              | 12  | 78598873  | A        | T                 | 60             | 0.0                        | 71           | 14.1                     | NAV3            | CCDS41815.1     | c.6927A>T                 | p.T2309T              | silent           | T                 |
| 1262       | PD8631 | PV          | JAK2              | 17  | 34236448  | G        | T                 | 76             | 1.3                        | 82           | 12.2                     | AC015849.4      | CCDS31216.1     | Non-coding                | RNA                   | T                |                   |
| 1263       | PD8631 | PV          | JAK2              | 10  | 118202630 | C        | T                 | 57             | 0.0                        | 92           | 12.0                     | PNLIPRP3        | CCDS31292.1     | c.268C>T                  | p.R90C                | missense         | T                 |
| 1264       | PD8631 | PV          | JAK2              | 7   | 148508779 | A        | G                 | 76             | 1.3                        | 62           | 11.3                     | EZH2            | CCDS5891.1      | c.1885T>C                 | p.W629R               | missense         | T                 |
| 1265       | PD8631 | PV          | JAK2              | 1   | 39352328  | C        | T                 | 141            | 0.0                        | 168          | 10.1                     | RHBDL2          | CCDS30680.1     | c.760G>A                  | p.G254R               | missense         | T                 |
| 1266       | PD8631 | PV          | JAK2              | 19  | 22496698  | T        | A                 | 210            | 0.0                        | 61           | 9.8                      | ZNF729          | ENST00000357491 | c.479T>A                  | p.M160K               | missense         | T                 |
| 1267       | PD8631 | PV          | JAK2              | 4   | 152060988 | G        | A                 | 26             | 0.0                        | 51           | 9.8                      | SH3D19          | CCDS34077.2     | c.1464C>T                 | p.H488H               | silent           | T                 |
| 1268       | PD8631 | PV          | JAK2              | 4   | 164247072 | G        | A                 | 52             | 0.0                        | 65           | 7.7                      | NPY1R           | CCDS34089.1     | c.635C>T                  | p.T212I               | missense         | T                 |
| 1269       | PD8631 | PV          | JAK2              | 2   | 132238024 | C        | T                 | 41             | 0.0                        | 185          | 6.5                      | TUBA3D          | CCDS33290.1     | c.758C>T                  | p.T253M               | missense         | T                 |
| 1270       | PD8631 | PV          | JAK2              | 19  | 5739421   | A        | C                 | 58             | 0.0                        | 66           | 6.1                      | TMEM146         | CCDS12149.2     | c.544A>C                  | p.S182R               | missense         | T                 |
| 1271       | PD8631 | PV          | JAK2              | 5   | 180374517 | T        | A                 | 153            | 0.0                        | 300          | 4.7                      | BTNL8           | CCDS43413.1     | c.679T>A                  | p.F227I               | missense         | T                 |
| 1272       | PD8632 | ET          | unmutated         | 19  | 13054627  | -        | insTTGTC          | 5              | 0.0                        | 9            | 55.6                     | CALR            | CCDS12288.1     | c.1154_1155insTTGTC       | p.K385fs*47           | frameshift       | M C               |
| 1273       | PD8632 | ET          | unmutated         | 13  | 111080938 | T        | C                 | 18             | 0.0                        | 44           | 47.7                     | COL4A2          | CCDS41907.1     | c.477+8T>C                | p.?                   | splice           | T                 |
| 1274       | PD8632 | ET          | unmutated         | 11  | 4609000   | C        | G                 | 427            | 0.9                        | 261          | 34.1                     | OR5212          | CCDS31355.1     | c.958C>G                  | p.P320A               | missense         | T                 |
| 1275       | PD8632 | ET          | unmutated         | 17  | 48264235  | C        | T                 | 29             | 0.0                        | 100          | 33.0                     | COL1A1          | CCDS11561.1     | c.3580G>A                 | p.A1194T              | missense         | T                 |
| 1276       | PD8632 | ET          | unmutated         | 3   | 54959184  | C        | T                 | 62             | 0.0                        | 67           | 26.9                     | LRTM1           | CCDS2876.1      | c.66G>A                   | p.P22P                | silent           | T                 |
| 1277       | PD8633 | PV          | JAK2              | 19  | 8550858   | -        | delGAGCG<11>CCATC | 15             | 0.0                        | 43           | 14.0                     | HNRNPM          | CCDS12203.1     | c.1546_1566del21          | p.E516_I522delERMGPAL | inframe          | M                 |
| 1278       | PD8633 | PV          | JAK2              | 7   | 31146163  | C        | T                 | 128            | 0.0                        | 88           | 10.2                     | ADCYAP1R1       | CCDS5433.1      | c.1272C>T                 | p.F424F               | silent           | M                 |
| 1279       | PD8633 | PV          | JAK2              | 9   | 5073770   | G        | T                 | 173            | 0.0                        | 154          | 7.8                      | JAK2            | CCDS6457.1      | c.1849G>T                 | p.V617F               | missense         | T                 |
| 1280       | PD8635 | ET          | unmutated         | 13  | 52345553  | -        | delATT            | 4              | 1.0                        | 24           | 45.8                     | DHRS12          | CCDS31976.1     | c.636_638delAAT           | p.I212delI            | inframe          | M                 |
| 1281       | PD8635 | ET          | unmutated         | 2   | 47641560  | -        | delIAAAAAAAAA     | 40             | 1.0                        | 20           | 20.0                     | MSH2            | CCDS1834.1      | c.942+3_942+10delaaaaaaaa | p.?                   | frameshift       | M                 |
| 1282       | PD8637 | ET          | unmutated         | 19  | 13054565  | -        | delGCAGA<42>AGGAG | 17             | 0.0                        | 17           | 29.4                     | CALR            | CCDS12288.1     | c.1092_1143delI52         | p.L367fs*46           | frameshift       | M C               |
| 1283       | PD8637 | ET          | unmutated         | 15  | 23811321  | G        | A                 | 66             | 0.0                        | 77           | 58.4                     | MKNR3           | CCDS10013.1     | c.392G>A                  | p.G131D               | missense         | T                 |
| 1284       | PD8637 | ET          | unmutated         | 19  | 54403681  | C        | T                 | 14             | 0.0                        | 53           | 41.5                     | PRKCG           | CCDS12867.1     | c.1382C>T                 | p.A461V               | missense         | T                 |
| 1285       | PD8637 | ET          | unmutated         | 17  | 44145030  | C        | A                 | 56             | 0.0                        | 51           | 35.3                     | KIAA1267        | CCDS11503.1     | c.1537G>T                 | p.E513*               | nonsense         | T                 |
| 1286       | PD8637 | ET          | unmutated         | 2   | 26667723  | C        | T                 | 85             | 0.0                        | 66           | 34.9                     | C2orf39         | CCDS1723.1      | c.1303C>T                 | p.P435S               | missense         | T                 |
| 1287       | PD8637 | ET          | unmutated         | 6   | 34101001  | G        | A                 | 29             | 0.0                        | 29           | 34.5                     | GRM4            | CCDS4787.1      | c.273C>T                  | p.N91N                | silent           | T                 |
| 1288       | PD8637 | ET          | unmutated         | 8   | 143623641 | C        | T                 | 14             | 0.0                        | 51           | 29.4                     | BAI1            | ENST00000323289 | c.4046C>T                 | p.P1349L              | missense         | T                 |
| 1289       | PD8637 | ET          | unmutated         | 11  | 57100173  | A        | G                 | 40             | 0.0                        | 73           | 27.4                     | SSRP1           | CCDS7952.1      | c.694T>C                  | p.Y232H               | missense         | T                 |
| 1290       | PD8637 | ET          | unmutated         | X   | 53588740  | A        | G                 | 96             | 0.0                        | 81           | 18.5                     | HUWE1           | CCDS35301.1     | c.7484T>C                 | p.F2495S              | missense         | T                 |
| 1291       | PD8640 | ET          | MPL               | 22  | 29837831  | G        | T                 | 104            | 6.7                        | 83           | 51.8                     | RFPL1           | CCDS13857.2     | c.674G>T                  | p.R225L               | missense         | T                 |
| 1292       | PD8640 | ET          | MPL               | 19  | 48382367  | C        | T                 | 179            | 2.8                        | 167          | 49.7                     | SULT2A1         | CCDS12707.1     | c.493G>A                  | p.D165N               | missense         | T                 |
| 1293       | PD8640 | ET          | MPL               | 5   | 140615008 | T        | C                 | 196            | 1.5                        | 206          | 48.1                     | PCDHB18         | ENST00000274705 | c.723T>C                  | p.H241H               | silent           | T                 |
| 1294       | PD8640 | ET          | MPL               | 17  | 45560429  | G        | T                 | 221            | 1.8                        | 130          | 46.9                     | ENSG00000228782 | ENST00000425159 | c.387C>A                  | p.A129A               | silent           | T                 |
| 1295       | PD8640 | ET          | MPL               | 1   | 43815009  | G        | T                 | 62             | 3.2                        | 67           | 46.3                     | MPL             | CCDS483.1       | c.1544G>T                 | p.W515L               | missense         | T                 |
| 1296       | PD8640 | ET          | MPL               | 2   | 25463302  | A        | C                 | 38             | 2.6                        | 50           | 44.0                     | DNMT3A          | CCDS33157.1     | c.2191T>G                 | p.F731V               | missense         | T C               |
| 1297       | PD8640 | ET          | MPL               | 3   | 161220904 | G        | T                 | 30             | 0.0                        | 37           | 43.2                     | ENSG00000182447 | CCDS46948.1     | c.608G>T                  | p.C203F               | missense         | T                 |
| 1298       | PD8640 | ET          | MPL               | 4   | 30726223  | G        | A                 | 29             | 0.0                        | 39           | 41.0                     | PCDH7           | CCDS43220.1     | c.3033+5G>A               | p.?                   | essential splice | T                 |

| Variant No | PDID   | MPN Subtype | JAK2/MPL mutation | Chr | Position  | Ref base | Mut base           | Germline reads | Germline allele burden (%) | Tumour reads | Tumour allele burden (%) | Gene            | CCDS            | DNA Change          | Protein Change | Type of Change   | Validation Method |
|------------|--------|-------------|-------------------|-----|-----------|----------|--------------------|----------------|----------------------------|--------------|--------------------------|-----------------|-----------------|---------------------|----------------|------------------|-------------------|
| 1299       | PD8640 | ET          | MPL               | 2   | 100029344 | A        | G                  | 46             | 0.0                        | 118          | 40.7                     | REV1            | CCDS2045.1      | c.2021T>C           | p.M674T        | missense         | T                 |
| 1300       | PD8640 | ET          | MPL               | 13  | 115052022 | C        | G                  | 42             | 2.4                        | 47           | 40.4                     | UPF3A           | CCDS9543.1      | c.549C>G            | p.T183T        | silent           | T                 |
| 1301       | PD8640 | ET          | MPL               | 20  | 31023437  | C        | G                  | 46             | 2.2                        | 89           | 39.3                     | ASXL1           | CCDS13201.1     | c.2922C>G           | p.Y974*        | nonsense         | T                 |
| 1302       | PD8640 | ET          | MPL               | 15  | 28090177  | G        | A                  | 61             | 4.9                        | 74           | 35.1                     | OCA2            | CCDS10020.1     | c.2360C>T           | p.A787V        | missense         | T                 |
| 1303       | PD8640 | ET          | MPL               | 11  | 58034551  | C        | T                  | 125            | 0.8                        | 72           | 34.7                     | OR10W1          | CCDS7968.1      | c.780G>A            | p.K260K        | silent           | T                 |
| 1304       | PD8640 | ET          | MPL               | 8   | 48885458  | C        | G                  | 69             | 0.0                        | 42           | 31.0                     | MCM4            | CCDS6143.1      | c.1970C>G           | p.A657G        | missense         | T                 |
| 1305       | PD8640 | ET          | MPL               | 22  | 32110551  | -        | delA               | 178            | 0.6                        | 171          | 24.0                     | C22orf30        | CCDS13900.2     | c.3274delT          | p.S1092fs*37   | frameshift       | T                 |
| 1306       | PD8640 | ET          | MPL               | 2   | 97276503  | T        | A                  | 376            | 0.0                        | 251          | 4.8                      | KIAA1310        | CCDS46361.1     | c.1279A>T           | p.N427Y        | missense         | T                 |
| 1307       | PD8642 | ET          | unmutated         | 19  | 13054565  | -        | delGCGAGA<42>AGGAG | 9              | 0.0                        | 30           | 33.3                     | CALR            | CCDS12288.1     | c.1092_1143del52    | p.L367fs*46    | frameshift       | M C               |
| 1308       | PD8642 | ET          | unmutated         | 1   | 183091306 | C        | T                  | 239            | 4.2                        | 107          | 39.3                     | LAMC1           | CCDS1351.1      | c.2321C>T           | p.P774L        | missense         | T                 |
| 1309       | PD8642 | ET          | unmutated         | 16  | 1961985   | C        | T                  | 20             | 0.0                        | 39           | 38.5                     | HS3ST6          | CCDS45381.1     | c.542G>A            | p.G181D        | missense         | T                 |
| 1310       | PD8642 | ET          | unmutated         | 14  | 95912380  | G        | A                  | 68             | 0.0                        | 163          | 26.4                     | C14orf49        | CCDS9935.1      | c.1498C>T           | p.Q500*        | nonsense         | T                 |
| 1311       | PD8642 | ET          | unmutated         | 11  | 105758298 | G        | C                  | 135            | 1.5                        | 35           | 22.9                     | GRIA4           | CCDS8333.1      | c.726G>C            | p.L242F        | missense         | T                 |
| 1312       | PD8642 | ET          | unmutated         | 12  | 6692423   | C        | T                  | 134            | 0.0                        | 246          | 21.1                     | CHD4            | CCDS8552.1      | c.4001G>A           | p.G1334D       | missense         | T                 |
| 1313       | PD8642 | ET          | unmutated         | 6   | 93964450  | G        | A                  | 69             | 0.0                        | 68           | 20.6                     | EPHA7           | CCDS5031.1      | c.2447C>T           | p.A816V        | missense         | T                 |
| 1314       | PD8642 | ET          | unmutated         | 6   | 90573428  | C        | G                  | 133            | 0.0                        | 177          | 19.2                     | CASP8AP2        | ENST00000455594 | c.2000C>G           | p.T667S        | missense         | T                 |
| 1315       | PD8642 | ET          | unmutated         | 9   | 125281519 | A        | C                  | 264            | 0.4                        | 177          | 14.1                     | OR1J4           | CCDS35122.1     | c.100A>C            | p.M34L         | missense         | T                 |
| 1316       | PD8642 | ET          | unmutated         | 11  | 74994323  | T        | C                  | 31             | 0.0                        | 53           | 11.3                     | ARRB1           | CCDS44684.1     | c.354+8A>G          | p.?            | splice           | T                 |
| 1317       | PD8642 | ET          | unmutated         | 1   | 94996094  | C        | T                  | 98             | 2.0                        | 89           | 11.2                     | F3              | ENST00000370207 | c.650G>A            | p.W217*        | nonsense         | T                 |
| 1318       | PD8642 | ET          | unmutated         | 17  | 39846180  | A        | C                  | 43             | 0.0                        | 86           | 10.5                     | EIF1            | CCDS11403.1     | c.182A>C            | p.K61T         | missense         | T                 |
| 1319       | PD8642 | ET          | unmutated         | 12  | 56848342  | G        | A                  | 54             | 0.0                        | 134          | 10.5                     | MIP             | CCDS8919.1      | c.56C>T             | p.A19V         | missense         | T                 |
| 1320       | PD8642 | ET          | unmutated         | 7   | 114269863 | C        | A                  | 126            | 3.2                        | 96           | 9.4                      | FOXP2           | CCDS43635.1     | c.475C>A            | p.Q159K        | missense         | T                 |
| 1321       | PD8642 | ET          | unmutated         | 2   | 179464144 | T        | A                  | 207            | 2.9                        | 260          | 8.9                      | TTN             | ENST00000356127 | c.48666A>T          | p.I16222I      | silent           | T                 |
| 1322       | PD8642 | ET          | unmutated         | 16  | 56717865  | T        | C                  | 101            | 2.0                        | 269          | 8.6                      | MT1X            | CCDS10768.1     | c.95-5T>C           | p.?            | splice           | T                 |
| 1323       | PD8642 | ET          | unmutated         | 13  | 7823580   | C        | G                  | 219            | 2.3                        | 500          | 4.6                      | ENSG00000215419 | ENST00000400287 | c.957G>C            | p.R319S        | missense         | T                 |
| 1324       | PD8643 | ET          | JAK2              | 9   | 5073770   | G        | T                  | 153            | 0.0                        | 210          | 8.1                      | JAK2            | CCDS6457.1      | c.1849G>T           | p.V617F        | missense         | T                 |
| 1325       | PD8643 | ET          | JAK2              | 7   | 156451184 | G        | C                  | 182            | 0.6                        | 161          | 5.0                      | RNF32           | CCDS5944.1      | c.604G>C            | p.V202L        | missense         | T                 |
| 1326       | PD8644 | ET          | JAK2              | 8   | 27927128  | T        | G                  | 346            | 6.4                        | 370          | 32.2                     | C8orf80         | CCDS47833.1     | c.190A>C            | p.T64P         | missense         | T                 |
| 1327       | PD8644 | ET          | JAK2              | 11  | 19192021  | T        | C                  | 28             | 0.0                        | 32           | 28.1                     | ZDHC13          | CCDS44550.1     | c.1538T>C           | p.I513T        | missense         | T                 |
| 1328       | PD8644 | ET          | JAK2              | 9   | 5073770   | G        | T                  | 300            | 0.0                        | 223          | 26.9                     | JAK2            | CCDS6457.1      | c.1849G>T           | p.V617F        | missense         | T                 |
| 1329       | PD8644 | ET          | JAK2              | 3   | 48694538  | G        | A                  | 24             | 0.0                        | 38           | 26.3                     | CELSR3          | CCDS2775.1      | c.3992C>T           | p.S1331L       | missense         | T                 |
| 1330       | PD8644 | ET          | JAK2              | 2   | 70130314  | G        | A                  | 271            | 5.9                        | 216          | 23.2                     | SNRNP27         | CCDS33219.1     | c.350G>A            | p.G117D        | missense         | T                 |
| 1331       | PD8644 | ET          | JAK2              | 12  | 118610293 | C        | T                  | 140            | 0.0                        | 217          | 17.5                     | TAOK3           | CCDS9188.1      | c.1868G>A           | p.R623Q        | missense         | T                 |
| 1332       | PD8644 | ET          | JAK2              | X   | 40568684  | G        | C                  | 111            | 0.0                        | 86           | 17.4                     | MED14           | CCDS14254.1     | c.1201C>G           | p.L401V        | missense         | T                 |
| 1333       | PD8644 | ET          | JAK2              | 1   | 82421647  | T        | C                  | 140            | 0.0                        | 147          | 17.0                     | LPHN2           | CCDS689.1       | c.1869T>C           | p.T623T        | silent           | T                 |
| 1334       | PD8644 | ET          | JAK2              | 2   | 137928444 | C        | T                  | 242            | 0.0                        | 188          | 14.9                     | THSD7B          | ENST00000272643 | c.1659C>T           | p.F553F        | silent           | T                 |
| 1335       | PD8644 | ET          | JAK2              | 19  | 17312945  | A        | T                  | 72             | 0.0                        | 156          | 14.1                     | MYO9B           | CCDS46010.1     | c.4669A>T           | p.K1557*       | nonsense         | T                 |
| 1336       | PD8644 | ET          | JAK2              | 2   | 101902564 | G        | A                  | 231            | 0.0                        | 205          | 12.7                     | RNF149          | CCDS2051.1      | c.939C>T            | p.V313V        | silent           | T                 |
| 1337       | PD8644 | ET          | JAK2              | 22  | 29108001  | C        | T                  | 101            | 0.0                        | 96           | 12.5                     | CHEK2           | CCDS33629.1     | c.817G>A            | p.A273T        | missense         | T                 |
| 1338       | PD8644 | ET          | JAK2              | 15  | 41011043  | A        | C                  | 89             | 2.3                        | 130          | 10.0                     | RAD51           | CCDS10062.1     | c.476A>C            | p.Y159S        | missense         | T                 |
| 1339       | PD8644 | ET          | JAK2              | 3   | 120977900 | C        | T                  | 169            | 0.0                        | 128          | 9.4                      | STXBPSL         | CCDS43137.1     | c.1843C>T           | p.R615W        | missense         | T                 |
| 1340       | PD8644 | ET          | JAK2              | 3   | 122591345 | G        | C                  | 363            | 0.8                        | 354          | 5.7                      | DIRC2           | CCDS3018.1      | c.1222G>C           | p.V408L        | missense         | T                 |
| 1341       | PD8644 | ET          | JAK2              | X   | 119387380 | T        | C                  | 500            | 0.0                        | 500          | 4.2                      | ZBTB33          | CCDS14596.1     | c.110T>C            | p.I37T         | missense         | T                 |
| 1342       | PD8942 | ET          | unmutated         | 19  | 13054627  | -        | insTTGTC           | 4              | 0.0                        | 7            | 57.1                     | CALR            | CCDS12288.1     | c.1154_1155insTTGTC | p.K385fs*47    | frameshift       | M T C             |
| 1343       | PD8942 | ET          | unmutated         | 1   | 112997118 | G        | A                  | 257            | 5.1                        | 240          | 48.3                     | CTTNBP2NL       | CCDS845.1       | c.378G>A            | p.T126T        | silent           | M                 |
| 1344       | PD8942 | ET          | unmutated         | 7   | 122153323 | G        | A                  | 73             | 0.0                        | 69           | 13.0                     | CADPS2          | CCDS47691.1     | c.1522C>T           | p.R508C        | missense         | M                 |
| 1345       | PD8943 | PET-MF      | unmutated         | 1   | 17736549  | T        | C                  | 19             | 0.0                        | 22           | 77.3                     | RCC2            | CCDS181.1       | c.1387-2A>G         | p.?            | essential splice | M                 |
| 1346       | PD8943 | PET-MF      | unmutated         | 8   | 108264028 | G        | A                  | 58             | 0.0                        | 37           | 59.5                     | ANGPT1          | CCDS6306.1      | Non-coding          | r.2049c>u      | UTR              | M                 |
| 1347       | PD8943 | PET-MF      | unmutated         | 3   | 24009427  | A        | G                  | 102            | 0.0                        | 74           | 56.8                     | NR1D2           | CCDS33718.1     | c.1456A>G           | p.M486V        | missense         | M                 |
| 1348       | PD8943 | PET-MF      | unmutated         | 2   | 219305522 | G        | T                  | 24             | 0.0                        | 42           | 54.8                     | VIL1            | CCDS2417.1      | c.2307G>T           | p.L769L        | silent           | M                 |
| 1349       | PD8943 | PET-MF      | unmutated         | 2   | 203162177 | A        | G                  | 134            | 0.0                        | 98           | 54.1                     | NOP58           | CCDS2353.1      | c.1147A>G           | p.M383V        | missense         | M                 |
| 1350       | PD8943 | PET-MF      | unmutated         | 19  | 22363093  | G        | A                  | 195            | 0.5                        | 115          | 53.9                     | ZNF676          | CCDS42539.1     | c.1426C>T           | p.P476S        | missense         | M                 |

| Variant No | PDID   | MPN Subtype | JAK2/MPL mutation | Chr | Position  | Ref base | Mut base          | Germline reads | Germline allele burden (%) | Tumour reads | Tumour allele burden (%) | Gene            | CCDS            | DNA Change          | Protein Change | Type of Change | Validation Method |
|------------|--------|-------------|-------------------|-----|-----------|----------|-------------------|----------------|----------------------------|--------------|--------------------------|-----------------|-----------------|---------------------|----------------|----------------|-------------------|
| 1351       | PD8943 | PET-MF      | unmutated         | 17  | 29559200  | T        | G                 | 82             | 0.0                        | 47           | 53.2                     | NF1             | CCDS42292.1     | c.3307T>G           | p.F1103V       | missense       | M                 |
| 1352       | PD8943 | PET-MF      | unmutated         | 12  | 75444967  | T        | A                 | 111            | 0.0                        | 100          | 51.0                     | KCNK2           | CCDS9007.1      | c.818A>T            | p.Q273L        | missense       | M                 |
| 1353       | PD8943 | PET-MF      | unmutated         | 3   | 52734472  | G        | C                 | 96             | 0.0                        | 80           | 50.0                     | GLT8D1          | CCDS2862.1      | c.5C>G              | p.S2*          | nonsense       | M                 |
| 1354       | PD8943 | PET-MF      | unmutated         | 10  | 71716795  | C        | A                 | 46             | 0.0                        | 57           | 47.4                     | COL13A1         | CCDS44420.1     | c.2148C>A           | p.N716K        | missense       | M                 |
| 1355       | PD8943 | PET-MF      | unmutated         | 15  | 89825042  | T        | C                 | 94             | 0.0                        | 104          | 47.1                     | FANCI           | CCDS45346.1     | c.1559T>C           | p.V520A        | missense       | M                 |
| 1356       | PD8943 | PET-MF      | unmutated         | 10  | 30653708  | G        | A                 | 31             | 0.0                        | 41           | 46.3                     | MTPAP           | ENST00000358107 | c.474C>T            | p.A158A        | silent         | M                 |
| 1357       | PD8943 | PET-MF      | unmutated         | 5   | 80552759  | T        | C                 | 52             | 0.0                        | 46           | 45.7                     | CKMT2           | CCDS4053.1      | c.695T>C            | p.V232A        | missense       | M                 |
| 1358       | PD8943 | PET-MF      | unmutated         | 17  | 39645706  | G        | C                 | 36             | 0.0                        | 107          | 43.9                     | KRT36           | CCDS11395.1     | c.411C>G            | p.C137W        | missense       | M                 |
| 1359       | PD8943 | PET-MF      | unmutated         | 5   | 23527933  | T        | A                 | 15             | 0.0                        | 23           | 43.5                     | PRDM9           | CCDS43307.1     | Non-coding          | r.2918u>a      | UTR            | M                 |
| 1360       | PD8943 | PET-MF      | unmutated         | 11  | 85979541  | A        | G                 | 193            | 0.0                        | 87           | 42.5                     | EED             | CCDS8273.1      | c.904A>G            | p.R302G        | missense       | M                 |
| 1361       | PD8943 | PET-MF      | unmutated         | 6   | 50803774  | T        | C                 | 251            | 0.0                        | 118          | 42.4                     | TFAP2B          | CCDS4934.2      | c.602T>C            | p.V201A        | missense       | M                 |
| 1362       | PD8943 | PET-MF      | unmutated         | 12  | 67705481  | A        | G                 | 59             | 0.0                        | 60           | 41.7                     | CAND1           | CCDS8977.1      | c.3369A>G           | p.T1123T       | silent         | M                 |
| 1363       | PD8943 | PET-MF      | unmutated         | 5   | 156670701 | G        | A                 | 151            | 0.0                        | 94           | 40.4                     | ITK             | CCDS4336.1      | c.1129G>A           | p.V377M        | missense       | M                 |
| 1364       | PD8943 | PET-MF      | unmutated         | 20  | 31022403  | -        | delCACCA<13>GCGGC | 10             | 0.0                        | 25           | 16.0                     | ASXL1           | CCDS13201.1     | c.1888_1910del23    | p.E635fs*15    | frameshift     | M                 |
| 1365       | PD8943 | PET-MF      | unmutated         | 17  | 38189431  | C        | A                 | 17             | 0.0                        | 32           | 15.6                     | MED24           | CCDS11359.1     | c.700G>T            | p.E234*        | nonsense       | M                 |
| 1366       | PD8943 | PET-MF      | unmutated         | 15  | 40917018  | C        | A                 | 40             | 0.0                        | 40           | 12.5                     | CASC5           | CCDS42023.1     | c.4634C>A           | p.A1545D       | missense       | M                 |
| 1367       | PD8943 | PET-MF      | unmutated         | 5   | 150282754 | C        | A                 | 108            | 0.0                        | 40           | 12.5                     | ZNF300          | ENST00000446148 | c.22-10G>T          | p.?            | splice         | M                 |
| 1368       | PD8943 | PET-MF      | unmutated         | 20  | 24944532  | C        | A                 | 27             | 0.0                        | 61           | 9.8                      | C20orf3         | CCDS13166.1     | c.1168G>T           | p.E390*        | nonsense       | M                 |
| 1369       | PD8943 | PET-MF      | unmutated         | 11  | 46907700  | C        | A                 | 86             | 0.0                        | 65           | 9.2                      | LRP4            | CCDS31478.1     | c.2448G>T           | p.E816D        | missense       | M                 |
| 1370       | PD8943 | PET-MF      | unmutated         | 7   | 154379692 | A        | C                 | 45             | 0.0                        | 86           | 5.8                      | DPP6            | ENST00000406326 | c.960A>C            | p.P320P        | silent         | M                 |
| 1371       | PD8943 | PET-MF      | unmutated         | 19  | 13054627  | -        | insTTGTC          | 3              | 0.0                        | 7            | 57.1                     | CALR            | CCDS12288.1     | c.1154_1155insTTGTC | p.K385fs*47    | frameshift     | M T C             |
| 1372       | PD8944 | ET          | MPL               | 4   | 100871390 | G        | T                 | 16             | 0.0                        | 25           | 28.0                     | H2AFZ           | CCDS3654.1      | Non-coding          | r.156c>a       | UTR            | M                 |
| 1373       | PD8944 | ET          | MPL               | 1   | 43815009  | G        | T                 | 71             | 4.2                        | 67           | 16.4                     | MPL             | CCDS483.1       | c.1544G>T           | p.W515L        | missense       | T                 |
| 1374       | PD8944 | ET          | MPL               | 16  | 23678523  | T        | G                 | 42             | 0.0                        | 33           | 15.2                     | DCTN5           | CCDS10615.1     | Non-coding          | r.758u>g       | UTR            | M                 |
| 1375       | PD8945 | ET          | unmutated         | 12  | 21926351  | A        | G                 | 54             | 0.0                        | 41           | 12.2                     | KCNJ5           | CCDS8692.1      | c.200T>C            | p.L67P         | missense       | M                 |
| 1376       | PD9409 | PMF         | JAK2              | 9   | 5073770   | G        | T                 | 144            | 0.0                        | 131          | 45.0                     | JAK2            | CCDS6457.1      | c.1849G>T           | p.V617F        | missense       | T                 |
| 1377       | PD9409 | PMF         | JAK2              | 3   | 52817062  | G        | A                 | 32             | 0.0                        | 83           | 27.7                     | ITIH1           | CCDS2864.1      | c.1020G>A           | p.W340*        | nonsense       | M                 |
| 1378       | PD9409 | PMF         | JAK2              | 10  | 118969313 | C        | T                 | 34             | 0.0                        | 58           | 24.1                     | KCNK18          | CCDS7598.1      | c.658C>T            | p.R220C        | missense       | T                 |
| 1379       | PD9409 | PMF         | JAK2              | 13  | 41524011  | G        | A                 | 118            | 0.0                        | 75           | 21.3                     | ELF1            | CCDS9374.1      | c.460C>T            | p.Q154*        | nonsense       | T                 |
| 1380       | PD9409 | PMF         | JAK2              | 17  | 48271336  | C        | T                 | 17             | 0.0                        | 35           | 20.0                     | COL1A1          | CCDS11561.1     | c.1735G>A           | p.V579M        | missense       | M                 |
| 1381       | PD9409 | PMF         | JAK2              | 17  | 79517543  | G        | A                 | 19             | 0.0                        | 47           | 10.6                     | C17orf70        | CCDS32765.1     | c.524C>T            | p.A175V        | missense       | M                 |
| 1382       | PD9410 | PMF         | JAK2              | 9   | 5073770   | G        | T                 | 140            | 0.0                        | 111          | 17.1                     | JAK2            | CCDS6457.1      | c.1849G>T           | p.V617F        | missense       | T                 |
| 1383       | PD9410 | PMF         | JAK2              | 21  | 44514777  | T        | G                 | 45             | 0.0                        | 48           | 14.6                     | U2AF1           | CCDS13694.1     | c.470A>C            | p.Q157P        | missense       | T                 |
| 1384       | PD9410 | PMF         | JAK2              | 16  | 4016686   | G        | A                 | 57             | 0.0                        | 135          | 13.3                     | ADCY9           | CCDS32382.1     | c.3152C>T           | p.S1051F       | missense       | T                 |
| 1385       | PD9410 | PMF         | JAK2              | 20  | 31022712  | C        | T                 | 27             | 0.0                        | 38           | 13.2                     | ASXL1           | CCDS13201.1     | c.2197C>T           | p.Q733*        | nonsense       | T                 |
| 1386       | PD9410 | PMF         | JAK2              | 12  | 122090661 | C        | A                 | 49             | 0.0                        | 35           | 11.4                     | MORN3           | CCDS31917.1     | c.702G>T            | p.R234S        | missense       | T                 |
| 1387       | PD9411 | PMF         | JAK2              | 8   | 124659198 | G        | A                 | 145            | 0.0                        | 198          | 63.1                     | KLHL38          | CCDS43766.1     | c.1407C>T           | p.N469N        | silent         | T                 |
| 1388       | PD9411 | PMF         | JAK2              | 19  | 57329187  | G        | A                 | 19             | 0.0                        | 16           | 62.5                     | PEG3AS          | CCDS12948.1     | c.789C>T            | p.D263D        | silent         | T                 |
| 1389       | PD9411 | PMF         | JAK2              | 1   | 157803029 | C        | T                 | 117            | 0.0                        | 78           | 51.3                     | CDS5            | CCDS1171.1      | c.992G>A            | p.G331E        | missense       | T                 |
| 1390       | PD9411 | PMF         | JAK2              | 20  | 31021250  | C        | T                 | 71             | 0.0                        | 90           | 51.1                     | ASXL1           | CCDS13201.1     | c.1249C>T           | p.R417*        | nonsense       | T                 |
| 1391       | PD9411 | PMF         | JAK2              | 12  | 108169147 | G        | T                 | 19             | 0.0                        | 11           | 45.5                     | ASCL4           | CCDS31894.2     | c.155G>T            | p.R52L         | missense       | T                 |
| 1392       | PD9411 | PMF         | JAK2              | 18  | 52896219  | G        | A                 | 133            | 0.0                        | 110          | 40.9                     | TCF4            | CCDS42438.1     | c.1738C>T           | p.R580W        | missense       | T                 |
| 1393       | PD9411 | PMF         | JAK2              | 17  | 39258401  | G        | A                 | 21             | 0.0                        | 44           | 40.9                     | ENSG00000241241 | ENST00000440582 | c.61C>T             | p.P21S         | missense       | T                 |
| 1394       | PD9411 | PMF         | JAK2              | 10  | 5435809   | C        | T                 | 41             | 0.0                        | 36           | 38.9                     | TUBAL3          | CCDS7066.2      | c.1012G>A           | p.A338T        | missense       | T                 |
| 1395       | PD9411 | PMF         | JAK2              | 11  | 65113527  | C        | T                 | 95             | 0.0                        | 94           | 37.2                     | DPF2            | CCDS8100.1      | c.902C>T            | p.S301L        | missense       | T                 |
| 1396       | PD9411 | PMF         | JAK2              | 7   | 148523590 | C        | T                 | 53             | 0.0                        | 31           | 29.0                     | EZH2            | CCDS5891.1      | c.863G>A            | p.R288Q        | missense       | T                 |
| 1397       | PD9411 | PMF         | JAK2              | 8   | 15531331  | C        | T                 | 121            | 0.0                        | 129          | 27.1                     | TUSC3           | CCDS5994.1      | c.784C>T            | p.H262Y        | missense       | T                 |
| 1398       | PD9411 | PMF         | JAK2              | 5   | 93120106  | G        | A                 | 155            | 0.0                        | 82           | 11.0                     | FAM172A         | CCDS4069.1      | c.1006C>T           | p.R336*        | nonsense       | T                 |
| 1399       | PD9412 | PMF         | JAK2              | Y   | 15435532  | C        | A                 | 41             | 2.4                        | 33           | 100.0                    | UTY             | CCDS14783.1     | c.2888G>T           | p.G963V        | missense       | T                 |
| 1400       | PD9412 | PMF         | JAK2              | 9   | 5073770   | G        | T                 | 136            | 0.0                        | 169          | 62.1                     | JAK2            | CCDS6457.1      | c.1849G>T           | p.V617F        | missense       | T                 |
| 1401       | PD9412 | PMF         | JAK2              | 9   | 34729283  | G        | A                 | 211            | 1.4                        | 243          | 61.3                     | ENSG00000205108 | ENST00000378788 | c.142C>T            | p.R48W         | missense       | T                 |
| 1402       | PD9412 | PMF         | JAK2              | 12  | 45810576  | C        | T                 | 42             | 0.0                        | 63           | 60.3                     | ANO6            | CCDS44865.1     | c.2106C>T           | p.D702D        | silent         | T                 |

| Variant No | PDID   | MPN Subtype | JAK2/MPL mutation | Chr | Position  | Ref base | Mut base  | Germline reads | Germline allele burden (%) | Tumour reads | Tumour allele burden (%) | Gene     | CCDS                            | DNA Change         | Protein Change  | Type of Change | Validation Method |
|------------|--------|-------------|-------------------|-----|-----------|----------|-----------|----------------|----------------------------|--------------|--------------------------|----------|---------------------------------|--------------------|-----------------|----------------|-------------------|
| 1403       | PD9412 | PMF         | JAK2              | 4   | 170912850 | C        | T         | 58             | 0.0                        | 43           | 53.5                     | MFAP3L   | CCDS34103.1                     | c.909G>A           | p.S303S         | silent         | T                 |
| 1404       | PD9412 | PMF         | JAK2              | 3   | 86010782  | G        | A         | 66             | 0.0                        | 72           | 52.8                     | CADM2    | CCDS33792.1                     | c.934G>A           | p.V312I         | missense       | T                 |
| 1405       | PD9412 | PMF         | JAK2              | 11  | 810334    | G        | T         | 16             | 0.0                        | 27           | 48.2                     | RPLP2    | CCDS7717.1                      | c.100G>T           | p.A34S          | missense       | T                 |
| 1406       | PD9412 | PMF         | JAK2              | 1   | 115128224 | T        | C         | 80             | 0.0                        | 50           | 44.0                     | DENND2C  | CCDS875.1                       | c.2613A>G          | p.K871K         | silent         | T                 |
| 1407       | PD9412 | PMF         | JAK2              | 17  | 38340509  | C        | T         | 106            | 0.0                        | 117          | 42.7                     | RAPGEF11 | CCDS11363.1                     | c.25C>T            | p.R9W           | missense       | T                 |
| 1408       | PD9412 | PMF         | JAK2              | 1   | 248757047 | A        | G         | 78             | 0.0                        | 70           | 34.3                     | OR2T10   | CCDS31121.1                     | c.23T>C            | p.L8P           | missense       | T                 |
| 1409       | PD9412 | PMF         | JAK2              | 3   | 130287404 | G        | A         | 182            | 0.6                        | 187          | 34.2                     | COL6A6   | CCDS46911.1                     | c.2357G>A          | p.R786H         | missense       | T                 |
| 1410       | PD9412 | PMF         | JAK2              | 1   | 153657511 | G        | A         | 35             | 0.0                        | 45           | 31.1                     | NPR1     | CCDS1051.1                      | c.1556G>A          | p.S519N         | missense       | T                 |
| 1411       | PD9412 | PMF         | JAK2              | 1   | 217947788 | C        | T         | 215            | 0.5                        | 184          | 25.0                     | SPATA17  | CCDS1519.1                      | c.632C>T           | p.S211F         | missense       | T                 |
| 1412       | PD9412 | PMF         | JAK2              | 3   | 128200131 | _        | ins_del   | 56             | 0.0                        | 30           | 23.3                     | GATA2    | c.1162_1173delATGAAGAAGGAinsTTC | p.M388_E391delinF  | frameshift      | T              |                   |
| 1413       | PD9412 | PMF         | JAK2              | 19  | 11486314  | _        | delAGACCC | 105            | 0.0                        | 34           | 14.0                     | C19orf39 | CCDS12259.1                     | c.312_317delAGACCC | p.D105P106delDP | inframe        | T                 |
| 1414       | PD9412 | PMF         | JAK2              | 17  | 30267491  | _        | delAACA   | 23             | 0.0                        | 15           | 6.0                      | SUZ12P   | CCDS11270.1                     | c.372_375delAACA   | p.N126fs*15     | frameshift     | T                 |
| 1415       | PD9415 | PMF         | JAK2              | 12  | 116421136 | C        | T         | 78             | 0.0                        | 64           | 60.9                     | MED13L   | CCDS9177.1                      | c.4741G>A          | p.G1581S        | missense       | T                 |
| 1416       | PD9415 | PMF         | JAK2              | 1   | 228430956 | C        | T         | 56             | 0.0                        | 48           | 60.4                     | OBSCN    | ENST00000422127                 | c.3002C>T          | p.T1001M        | missense       | T                 |
| 1417       | PD9415 | PMF         | JAK2              | 3   | 123512526 | G        | A         | 29             | 0.0                        | 34           | 55.9                     | MYLK     | CCDS46896.1                     | c.163C>T           | p.R55W          | missense       | T                 |
| 1418       | PD9415 | PMF         | JAK2              | 6   | 33371816  | G        | A         | 100            | 0.0                        | 85           | 54.1                     | KIFC1    | CCDS34430.1                     | c.666G>A           | p.T222T         | silent         | T                 |
| 1419       | PD9415 | PMF         | JAK2              | 4   | 3318020   | C        | G         | 26             | 0.0                        | 53           | 52.8                     | RGS12    | CCDS3366.1                      | c.123C>G           | p.P41P          | silent         | T                 |
| 1420       | PD9415 | PMF         | JAK2              | 5   | 82835692  | G        | A         | 81             | 0.0                        | 77           | 52.0                     | VCAN     | CCDS4060.1                      | c.6870G>A          | p.V2290V        | silent         | T                 |
| 1421       | PD9415 | PMF         | JAK2              | 17  | 74732959  | G        | T         | 18             | 0.0                        | 16           | 50.0                     | SFRS2    | CCDS11749.1                     | c.284C>A           | p.P95H          | missense       | T                 |
| 1422       | PD9415 | PMF         | JAK2              | 20  | 9319661   | G        | A         | 47             | 2.1                        | 71           | 49.3                     | PLCB4    | CCDS13104.1                     | c.346G>A           | p.A116T         | missense       | T                 |
| 1423       | PD9415 | PMF         | JAK2              | 17  | 48602274  | C        | T         | 48             | 0.0                        | 53           | 49.1                     | MYCBPAP  | CCDS32680.2                     | c.1801C>T          | p.R601C         | missense       | T                 |
| 1424       | PD9415 | PMF         | JAK2              | 9   | 116175797 | G        | A         | 39             | 0.0                        | 49           | 49.0                     | C9orf43  | CCDS6796.1                      | c.24G>A            | p.Q8Q           | silent         | T                 |
| 1425       | PD9415 | PMF         | JAK2              | 5   | 79054625  | C        | A         | 174            | 0.0                        | 144          | 48.6                     | CMYA5    | CCDS47238.1                     | c.11160C>A         | p.S3720R        | missense       | T                 |
| 1426       | PD9415 | PMF         | JAK2              | 4   | 106197285 | T        | C         | 51             | 0.0                        | 33           | 48.5                     | TET2     | CCDS47120.1                     | c.5618T>C          | p.I1873T        | missense       | T                 |
| 1427       | PD9415 | PMF         | JAK2              | 10  | 24790464  | G        | A         | 41             | 0.0                        | 44           | 47.7                     | KIAA1217 | CCDS31165.1                     | c.1991G>A          | p.R664Q         | missense       | T                 |
| 1428       | PD9415 | PMF         | JAK2              | 17  | 56573571  | C        | T         | 47             | 0.0                        | 36           | 47.2                     | MTMR4    | CCDS11608.1                     | c.1932G>A          | p.L644L         | silent         | T                 |
| 1429       | PD9415 | PMF         | JAK2              | 17  | 34951522  | G        | A         | 96             | 0.0                        | 67           | 46.3                     | DHRS11   | CCDS11315.2                     | c.269G>A           | p.G90D          | missense       | T                 |
| 1430       | PD9415 | PMF         | JAK2              | 6   | 5771526   | C        | T         | 42             | 0.0                        | 31           | 45.2                     | FARS2    | CCDS4494.1                      | c.1220C>T          | p.T407M         | missense       | T                 |
| 1431       | PD9415 | PMF         | JAK2              | 6   | 63990252  | C        | T         | 104            | 1.0                        | 113          | 45.1                     | LGSN     | CCDS4964.1                      | c.1204G>A          | p.G402S         | missense       | T                 |
| 1432       | PD9415 | PMF         | JAK2              | 20  | 31023261  | A        | T         | 55             | 0.0                        | 71           | 43.7                     | ASXL1    | CCDS13201.1                     | c.2746A>T          | p.R916*         | nonsense       | T                 |
| 1433       | PD9415 | PMF         | JAK2              | 5   | 110439576 | G        | A         | 132            | 0.0                        | 56           | 42.9                     | WDR36    | CCDS4102.1                      | c.857G>A           | p.R286H         | missense       | T                 |
| 1434       | PD9415 | PMF         | JAK2              | 9   | 5073770   | G        | T         | 179            | 0.0                        | 119          | 41.2                     | JAK2     | CCDS6457.1                      | c.1849G>T          | p.V617F         | missense       | T                 |
| 1435       | PD9415 | PMF         | JAK2              | 8   | 67478976  | A        | G         | 204            | 0.5                        | 121          | 40.5                     | MYBL1    | CCDS47867.1                     | c.1893T>C          | p.N631N         | silent         | T                 |
| 1436       | PD9415 | PMF         | JAK2              | 19  | 2403080   | G        | A         | 14             | 0.0                        | 13           | 38.5                     | TMPRSS9  | CCDS12088.1                     | c.455G>A           | p.G152D         | missense       | T                 |
| 1437       | PD9415 | PMF         | JAK2              | 14  | 23586984  | C        | T         | 41             | 0.0                        | 34           | 38.2                     | CEBPE    | CCDS9589.1                      | c.558G>A           | p.A186A         | silent         | T                 |
| 1438       | PD9415 | PMF         | JAK2              | 1   | 205689762 | _        | delIT     | 74             | 0.0                        | 43           | 37.2                     | NUCKS1   | CCDS30987.1                     | c.249delA          | p.E84fs*54      | frameshift     | T                 |
| 1439       | PD9416 | MPN_u       | JAK2              | 19  | 45923652  | C        | T         | 17             | 0.0                        | 17           | 58.8                     | ERCC1    | CCDS12663.1                     | c.355G>A           | p.V119M         | missense       | T                 |
| 1440       | PD9416 | MPN_u       | JAK2              | 5   | 126753474 | T        | C         | 44             | 0.0                        | 29           | 58.6                     | MEGF10   | CCDS4142.1                      | c.1275T>C          | p.T425T         | silent         | T                 |
| 1441       | PD9416 | MPN_u       | JAK2              | 14  | 50625345  | A        | C         | 116            | 0.0                        | 111          | 52.3                     | SOS2     | CCDS9697.1                      | c.1872T>G          | p.T624T         | silent         | T                 |
| 1442       | PD9416 | MPN_u       | JAK2              | 9   | 5073770   | G        | T         | 148            | 0.0                        | 131          | 51.2                     | JAK2     | CCDS6457.1                      | c.1849G>T          | p.V617F         | missense       | T                 |
| 1443       | PD9416 | MPN_u       | JAK2              | 4   | 53468066  | C        | T         | 55             | 0.0                        | 76           | 43.4                     | USP46    | CCDS47053.1                     | c.877G>A           | p.D293N         | missense       | T                 |
| 1444       | PD9416 | MPN_u       | JAK2              | 8   | 18413811  | G        | A         | 132            | 0.0                        | 114          | 41.2                     | PSD3     | CCDS43720.1                     | c.2836C>T          | p.L946L         | silent         | T                 |
| 1445       | PD9416 | MPN_u       | JAK2              | 4   | 106888582 | G        | A         | 33             | 0.0                        | 23           | 34.8                     | NPNT     | CCDS3796.1                      | c.1586G>A          | p.R529Q         | missense       | T                 |
| 1446       | PD9416 | MPN_u       | JAK2              | 4   | 106157814 | _        | insA      | 66             | 0.0                        | 54           | 33.3                     | TET2     | CCDS47120.1                     | c.2715_2716insA    | p.M906fs*18     | frameshift     | T                 |
| 1447       | PD9416 | MPN_u       | JAK2              | 9   | 136596438 | G        | A         | 14             | 0.0                        | 24           | 33.3                     | SARDH    | CCDS6978.1                      | c.679C>T           | p.R227*         | nonsense       | T                 |
| 1448       | PD9416 | MPN_u       | JAK2              | 2   | 25141256  | G        | A         | 14             | 0.0                        | 24           | 33.3                     | ADCY3    | CCDS1715.1                      | c.601C>T           | p.H201Y         | missense       | T                 |
| 1449       | PD9416 | MPN_u       | JAK2              | 16  | 70913204  | G        | A         | 40             | 0.0                        | 39           | 28.2                     | HYDIN2   | CCDS42189.1                     | c.10550C>T         | p.A3517V        | missense       | T                 |
| 1450       | PD9416 | MPN_u       | JAK2              | 17  | 67305421  | T        | C         | 77             | 0.0                        | 92           | 22.8                     | ABCA5    | CCDS11685.1                     | c.451A>G           | p.I151V         | missense       | T                 |
| 1451       | PD9417 | PMF         | JAK2              | 15  | 85327544  | G        | A         | 61             | 0.0                        | 56           | 30.4                     | ZNF592   | CCDS32317.1                     | c.1638G>A          | p.K546K         | silent         | T                 |
| 1452       | PD9417 | PMF         | JAK2              | 9   | 5073770   | G        | T         | 135            | 0.0                        | 142          | 30.3                     | JAK2     | CCDS6457.1                      | c.1849G>T          | p.V617F         | missense       | T                 |
| 1453       | PD9417 | PMF         | JAK2              | 6   | 93965550  | G        | A         | 54             | 0.0                        | 48           | 29.2                     | EPHA7    | CCDS5031.1                      | c.2378C>T          | p.T793I         | missense       | T                 |
| 1454       | PD9417 | PMF         | JAK2              | 2   | 217343018 | A        | C         | 111            | 0.9                        | 108          | 25.0                     | SMARCAL1 | CCDS2403.1                      | c.2621A>C          | p.Y874S         | missense       | T                 |

| Variant No | PDID   | MPN Subtype | JAK2/MPL mutation | Chr | Position  | Ref base | Mut base          | Germline reads | Germline allele burden (%) | Tumour reads | Tumour allele burden (%) | Gene            | CCDS            | DNA Change       | Protein Change | Type of Change | Validation Method |
|------------|--------|-------------|-------------------|-----|-----------|----------|-------------------|----------------|----------------------------|--------------|--------------------------|-----------------|-----------------|------------------|----------------|----------------|-------------------|
| 1455       | PD9417 | PMF         | JAK2              | 19  | 9346728   | A        | G                 | 112            | 0.9                        | 113          | 23.9                     | ENSG00000188314 | ENST00000344049 | c.594A>G         | p.R198R        | silent         | T                 |
| 1456       | PD9417 | PMF         | JAK2              | 17  | 3370847   | G        | A                 | 54             | 0.0                        | 21           | 23.8                     | SPATA22         | CCDS11027.1     | c.45C>T          | p.G15G         | silent         | T                 |
| 1457       | PD9417 | PMF         | JAK2              | 17  | 7577114   | C        | T                 | 45             | 0.0                        | 32           | 21.9                     | TP53            | CCDS11118.1     | c.824G>A         | p.C275Y        | missense       | T                 |
| 1458       | PD9417 | PMF         | JAK2              | X   | 129154967 | A        | G                 | 48             | 0.0                        | 40           | 10.0                     | BCORL1          | CCDS14616.1     | c.3449A>G        | p.K1150R       | missense       | T                 |
| 1459       | PD9418 | PMF         | JAK2              | 4   | 106156035 | -        | insA              | 79             | 1.3                        | 22           | 31.8                     | TET2            | CCDS47120.1     | c.936_937insA    | p.T313fs*18    | frameshift     | M                 |
| 1460       | PD9418 | PMF         | JAK2              | 20  | 44520238  | -        | delCTG            | 11             | 3.0                        | 28           | 25.0                     | CTSA            | CCDS13385.2     | c.85_87delCTG    | p.L29delL      | inframe        | T                 |
| 1461       | PD9418 | PMF         | JAK2              | 1   | 109276151 | T        | A                 | 71             | 1.4                        | 48           | 20.8                     | FNDC7           | CCDS44185.1     | c.2137T>A        | p.S713T        | missense       | T                 |
| 1462       | PD9418 | PMF         | JAK2              | 20  | 35884838  | G        | A                 | 17             | 0.0                        | 36           | 19.4                     | GHRH            | CCDS13292.1     | c.147C>T         | p.S49S         | silent         | T                 |
| 1463       | PD9418 | PMF         | JAK2              | 18  | 22040794  | T        | C                 | 153            | 2.0                        | 126          | 18.3                     | HRH4            | CCDS11887.1     | c.102T>C         | p.A34A         | silent         | T                 |
| 1464       | PD9418 | PMF         | JAK2              | 1   | 25785241  | G        | A                 | 229            | 2.2                        | 196          | 16.3                     | TMEM57          | CCDS30638.1     | c.1012G>A        | p.A338T        | missense       | T                 |
| 1465       | PD9418 | PMF         | JAK2              | 8   | 609907    | G        | A                 | 14             | 0.0                        | 49           | 10.2                     | ENSG00000206100 | ENST00000382819 | c.56C>T          | p.A19V         | missense       | T                 |
| 1466       | PD9418 | PMF         | JAK2              | 9   | 5073770   | G        | T                 | 116            | 0.9                        | 98           | 6.1                      | JAK2            | CCDS6457.1      | c.1849G>T        | p.V617F        | missense       | T                 |
| 1467       | PD9419 | PMF         | unmutated         | 3   | 134085206 | G        | A                 | 97             | 2.1                        | 207          | 56.5                     | AMOTL2          | CCDS33860.1     | c.1105C>T        | p.R369C        | missense       | T                 |
| 1468       | PD9419 | PMF         | unmutated         | 18  | 51750421  | A        | C                 | 10             | 0.0                        | 27           | 55.6                     | MBD2            | CCDS11953.1     | c.509T>G         | p.L170R        | missense       | T                 |
| 1469       | PD9419 | PMF         | unmutated         | 12  | 3686127   | T        | C                 | 150            | 0.0                        | 135          | 55.6                     | PRMT8           | CCDS8521.2      | c.803T>C         | p.V268A        | missense       | T                 |
| 1470       | PD9419 | PMF         | unmutated         | 11  | 100211267 | G        | A                 | 200            | 1.5                        | 177          | 52.5                     | CNTN5           | ENST00000279463 | c.2755G>A        | p.V919I        | missense       | T                 |
| 1471       | PD9419 | PMF         | unmutated         | 3   | 121647917 | C        | G                 | 181            | 0.0                        | 140          | 52.1                     | SLC15A2         | CCDS3007.1      | c.1430C>G        | p.T477S        | missense       | T                 |
| 1472       | PD9419 | PMF         | unmutated         | 6   | 27776252  | C        | A                 | 56             | 1.8                        | 41           | 51.2                     | HIST1H2AI       | CCDS4626.1      | c.265C>A         | p.R89S         | missense       | T                 |
| 1473       | PD9419 | PMF         | unmutated         | 20  | 31022712  | C        | T                 | 32             | 0.0                        | 30           | 46.7                     | ASXL1           | CCDS13201.1     | c.2197C>T        | p.Q733*        | nonsense       | T                 |
| 1474       | PD9419 | PMF         | unmutated         | 13  | 48955389  | -        | delC              | 46             | 0.0                        | 24           | 41.7                     | RB1             | CCDS31973.1     | c.1505delC       | p.T502fs*17    | frameshift     | T                 |
| 1475       | PD9419 | PMF         | unmutated         | 1   | 190068069 | G        | A                 | 85             | 0.0                        | 72           | 38.9                     | FAM5C           | CCDS1373.1      | c.1380C>T        | p.C460C        | silent         | T                 |
| 1476       | PD9419 | PMF         | unmutated         | 16  | 57723866  | C        | A                 | 39             | 0.0                        | 32           | 34.4                     | GPR97           | ENST00000327655 | c.1064C>A        | p.S355Y        | missense       | T                 |
| 1477       | PD9419 | PMF         | unmutated         | 20  | 57569190  | A        | G                 | 56             | 0.0                        | 45           | 33.3                     | TH1L            | CCDS13473.1     | c.1634A>G        | p.Y545C        | missense       | T                 |
| 1478       | PD9419 | PMF         | unmutated         | 6   | 151907162 | C        | T                 | 36             | 0.0                        | 33           | 30.3                     | C6orf97         | CCDS43515.1     | c.1231C>T        | p.L411L        | silent         | T                 |
| 1479       | PD9419 | PMF         | unmutated         | 7   | 148506443 | C        | T                 | 168            | 0.0                        | 125          | 14.4                     | EZH2            | CCDS5891.1      | c.2069G>A        | p.R690H        | missense       | T                 |
| 1480       | PD9419 | PMF         | unmutated         | 6   | 31721211  | G        | A                 | 45             | 0.0                        | 35           | 14.3                     | MSH5            | CCDS34409.1     | c.997G>A         | p.V333M        | missense       | T                 |
| 1481       | PD9419 | PMF         | unmutated         | 19  | 13054565  | -        | delGCAGA<42>AGGAG | 23             | 0.0                        | 18           | 16.7                     | CALR            | CCDS12288.1     | c.1092_1143del52 | p.L367fs*46    | frameshift     | M T C             |
| 1482       | PD9420 | PMF         | unmutated         | 14  | 23652114  | C        | A                 | 119            | 0.0                        | 89           | 47.2                     | SLC7A8          | CCDS9590.1      | c.10G>T          | p.G4*          | nonsense       | T                 |
| 1483       | PD9420 | PMF         | unmutated         | 2   | 196737130 | C        | A                 | 153            | 0.0                        | 82           | 43.9                     | DNAH7           | CCDS42794.1     | c.6477G>T        | p.L2159L       | silent         | T                 |
| 1484       | PD9420 | PMF         | unmutated         | 8   | 8239236   | T        | C                 | 24             | 0.0                        | 21           | 42.9                     | ENSG00000182319 | CCDS43706.1     | c.22A>G          | p.N8D          | missense       | T                 |
| 1485       | PD9420 | PMF         | unmutated         | 11  | 55451219  | C        | T                 | 345            | 0.0                        | 234          | 42.7                     | OR4P1P          | ENST00000345013 | c.233C>T         | p.T78M         | missense       | T                 |
| 1486       | PD9420 | PMF         | unmutated         | 13  | 53624898  | -        | delC              | 54             | 0.0                        | 62           | 38.7                     | OLFM4           | CCDS9440.1      | c.1525delC       | p.Q510fs*7     | frameshift     | T                 |
| 1487       | PD9420 | PMF         | unmutated         | 3   | 12963735  | C        | T                 | 18             | 0.0                        | 21           | 28.6                     | IQSEC1          | CCDS33703.1     | c.1780G>A        | p.V594M        | missense       | T                 |
| 1488       | PD9420 | PMF         | unmutated         | 11  | 108143537 | A        | G                 | 82             | 0.0                        | 63           | 20.6                     | ATM             | CCDS31669.1     | c.3242A>G        | p.N1081S       | missense       | T                 |
| 1489       | PD9423 | ET          | unmutated         | 19  | 13054565  | -        | delGCAGA<42>AGGAG | 26             | 0.0                        | 10           | 40.0                     | CALR            | CCDS12288.1     | c.1092_1143del52 | p.L367fs*46    | frameshift     | M C               |
| 1490       | PD9423 | ET          | unmutated         | 18  | 64178840  | G        | A                 | 120            | 0.0                        | 91           | 44.0                     | CDH19           | CCDS11994.1     | c.1541C>T        | p.T514I        | missense       | T                 |
| 1491       | PD9423 | ET          | unmutated         | 10  | 104596833 | G        | A                 | 41             | 0.0                        | 32           | 31.3                     | CYP17A1         | CCDS7541.1      | c.286C>T         | p.R96W         | missense       | T                 |
| 1492       | PD9423 | ET          | unmutated         | 11  | 32636148  | G        | A                 | 143            | 0.0                        | 66           | 21.2                     | CCDC73          | CCDS41630.1     | c.1716C>T        | p.N572N        | silent         | T                 |
| 1493       | PD9423 | ET          | unmutated         | 14  | 96707595  | C        | T                 | 17             | 0.0                        | 35           | 20.0                     | BDKRB2          | CCDS9942.1      | c.930C>T         | p.I310I        | silent         | T                 |
| 1494       | PD9423 | ET          | unmutated         | 7   | 11082383  | C        | A                 | 194            | 0.0                        | 130          | 15.4                     | PHF14           | CCDS47541.1     | c.2254C>A        | p.L752I        | missense       | T                 |
| 1495       | PD9423 | ET          | unmutated         | 2   | 10104439  | C        | T                 | 40             | 0.0                        | 60           | 15.0                     | GRHL1           | CCDS33144.1     | c.412C>T         | p.R138W        | missense       | T                 |
| 1496       | PD9423 | ET          | unmutated         | 16  | 68847239  | C        | T                 | 134            | 0.0                        | 117          | 12.0                     | CDH1            | CCDS10869.1     | c.1161C>T        | p.N387N        | silent         | T                 |
| 1497       | PD9423 | ET          | unmutated         | 17  | 10402008  | A        | C                 | 71             | 0.0                        | 95           | 11.6                     | MYH1            | CCDS11155.1     | c.4116T>G        | p.V1372V       | silent         | T                 |
| 1498       | PD9423 | ET          | unmutated         | 21  | 45798945  | C        | T                 | 27             | 0.0                        | 38           | 10.5                     | TRPM2           | CCDS13710.1     | c.1080C>T        | p.A360A        | silent         | T                 |

JAK2/MPL status was defined by source data and confirmed by exome sequencing. Validation method; T (custom bait capture and targetted resequencing), M (manual curation), C (Sanger sequencing).

**Table S3. Significance of recurrently mutated genes in 151 MPN samples.**

| gene_name | cds_ID    | n_syn  | n_mis    | n_non  | wMIS      | wNON      | pMIS   | pNON   | qMIS   | qNON   | qSPICE | qUNIFMUT |
|-----------|-----------|--------|----------|--------|-----------|-----------|--------|--------|--------|--------|--------|----------|
| TET2      | CCDS47120 | 1.0000 | 4.0000   | 8.0000 | 43.2281   | 1122.9864 | 0.0000 | 0.0000 | 0.0078 | 0.0000 | 1.0000 | 1.0000   |
| ASXL1     | CCDS13201 | 0.0000 | 0.0000   | 6.0000 | 0.0000    | 1141.5622 | 0.6827 | 0.0000 | 1.0000 | 0.0000 | 1.0000 | 1.0000   |
| PHIP      | CCDS4987  | 0.0000 | 0.0000   | 2.0000 | 0.0000    | 242.2355  | 0.6761 | 0.0000 | 1.0000 | 0.1505 | 1.0000 | 1.0000   |
| JAK2      | CCDS6457  | 0.0000 | 112.0000 | 0.0000 | 2171.6949 | 0.0000    | 0.0000 | 0.9252 | 0.0000 | 1.0000 | 1.0000 | 1.0000   |
| DNMT3A    | CCDS33157 | 0.0000 | 11.0000  | 0.0000 | 185.1983  | 0.0000    | 0.0000 | 0.9365 | 0.0000 | 1.0000 | 1.0000 | 1.0000   |
| MPL       | CCDS483   | 0.0000 | 7.0000   | 0.0000 | 208.9336  | 0.0000    | 0.0000 | 0.9369 | 0.0000 | 1.0000 | 1.0000 | 1.0000   |
| U2AF1     | CCDS13694 | 0.0000 | 4.0000   | 0.0000 | 224.9228  | 0.0000    | 0.0000 | 0.9648 | 0.0000 | 1.0000 | 1.0000 | 1.0000   |
| TP53      | CCDS11118 | 0.0000 | 3.0000   | 0.0000 | 130.2332  | 0.0000    | 0.0000 | 0.9588 | 0.0057 | 1.0000 | 1.0000 | 1.0000   |
| CHEK2     | CCDS33629 | 0.0000 | 3.0000   | 0.0000 | 105.0720  | 0.0000    | 0.0000 | 0.9497 | 0.0079 | 1.0000 | 1.0000 | 1.0000   |
| EZH2      | CCDS5891  | 0.0000 | 3.0000   | 0.0000 | 77.3616   | 0.0000    | 0.0000 | 0.9402 | 0.0179 | 1.0000 | 1.0000 | 1.0000   |
| SF3B1     | CCDS33356 | 0.0000 | 3.0000   | 0.0000 | 47.2070   | 0.0000    | 0.0000 | 0.9179 | 0.0733 | 1.0000 | 1.0000 | 1.0000   |
| PHF6      | CCDS14639 | 0.0000 | 2.0000   | 0.0000 | 122.8925  | 0.0000    | 0.0001 | 0.9494 | 0.1873 | 1.0000 | 1.0000 | 1.0000   |
| PRKACB    | CCDS693   | 0.0000 | 2.0000   | 0.0000 | 112.9548  | 0.0000    | 0.0001 | 0.9569 | 0.2033 | 1.0000 | 1.0000 | 1.0000   |
| IDH1      | CCDS2381  | 0.0000 | 2.0000   | 0.0000 | 95.8897   | 0.0000    | 0.0002 | 0.9573 | 0.2366 | 1.0000 | 1.0000 | 1.0000   |
| SRSF2     | CCDS11749 | 0.0000 | 2.0000   | 0.0000 | 93.6919   | 0.0000    | 0.0002 | 0.9668 | 0.2366 | 1.0000 | 1.0000 | 1.0000   |
| ZNF485    | CCDS7205  | 0.0000 | 2.0000   | 0.0000 | 95.0616   | 0.0000    | 0.0002 | 0.9540 | 0.2366 | 1.0000 | 1.0000 | 1.0000   |
| FARS2     | CCDS4494  | 0.0000 | 2.0000   | 0.0000 | 82.5813   | 0.0000    | 0.0002 | 0.9547 | 0.2880 | 1.0000 | 1.0000 | 1.0000   |
| GABRB3    | CCDS10018 | 0.0000 | 2.0000   | 0.0000 | 78.6749   | 0.0000    | 0.0002 | 0.9525 | 0.2990 | 1.0000 | 1.0000 | 1.0000   |
| EZH1      | CCDS32659 | 0.0000 | 2.0000   | 0.0000 | 52.8312   | 0.0000    | 0.0005 | 0.9388 | 0.6308 | 1.0000 | 1.0000 | 1.0000   |
| DTNA      | CCDS42425 | 0.0000 | 2.0000   | 0.0000 | 52.1854   | 0.0000    | 0.0006 | 0.9429 | 0.6308 | 1.0000 | 1.0000 | 1.0000   |
| TCF4      | CCDS58631 | 0.0000 | 2.0000   | 0.0000 | 49.6090   | 0.0000    | 0.0006 | 0.9415 | 0.6649 | 1.0000 | 1.0000 | 1.0000   |
| IL6ST     | CCDS3971  | 0.0000 | 2.0000   | 0.0000 | 48.2155   | 0.0000    | 0.0007 | 0.9353 | 0.6707 | 1.0000 | 1.0000 | 1.0000   |
| ZNF473    | CCDS33077 | 0.0000 | 2.0000   | 0.0000 | 43.7881   | 0.0000    | 0.0008 | 0.9386 | 0.7825 | 1.0000 | 1.0000 | 1.0000   |
| EPHA7     | CCDS5031  | 0.0000 | 2.0000   | 0.0000 | 41.0193   | 0.0000    | 0.0009 | 0.9317 | 0.8571 | 1.0000 | 1.0000 | 1.0000   |
| HUWE1     | CCDS35301 | 0.0000 | 2.0000   | 1.0000 | 8.8069    | 67.0359   | 0.0232 | 0.0112 | 1.0000 | 1.0000 | 1.0000 | 1.0000   |
| SARDH     | CCDS6978  | 0.0000 | 1.0000   | 1.0000 | 16.2575   | 313.1889  | 0.0544 | 0.0021 | 1.0000 | 1.0000 | 1.0000 | 1.0000   |
| MPHOSPH10 | CCDS1916  | 1.0000 | 1.0000   | 1.0000 | 32.1569   | 394.6692  | 0.0253 | 0.0016 | 1.0000 | 1.0000 | 1.0000 | 1.0000   |
| MUC16     | CCDS54212 | 3.0000 | 3.0000   | 0.0000 | 4.5380    | 0.0000    | 0.0360 | 0.8060 | 1.0000 | 1.0000 | 1.0000 | 1.0000   |
| HECW1     | CCDS5469  | 0.0000 | 2.0000   | 0.0000 | 21.0022   | 0.0000    | 0.0038 | 0.9114 | 1.0000 | 1.0000 | 1.0000 | 1.0000   |
| TG        | CCDS34944 | 1.0000 | 2.0000   | 0.0000 | 13.2801   | 0.0000    | 0.0099 | 0.8834 | 1.0000 | 1.0000 | 1.0000 | 1.0000   |
| SYNE2     | CCDS9761  | 1.0000 | 2.0000   | 0.0000 | 6.3895    | 0.0000    | 0.0443 | 0.8180 | 1.0000 | 1.0000 | 1.0000 | 1.0000   |
| ASPM      | CCDS1389  | 0.0000 | 2.0000   | 0.0000 | 12.5545   | 0.0000    | 0.0112 | 0.8633 | 1.0000 | 1.0000 | 1.0000 | 1.0000   |
| ABCC9     | CCDS8693  | 0.0000 | 2.0000   | 0.0000 | 27.1517   | 0.0000    | 0.0022 | 0.9194 | 1.0000 | 1.0000 | 1.0000 | 1.0000   |
| FAT2      | CCDS4317  | 0.0000 | 2.0000   | 0.0000 | 8.9551    | 0.0000    | 0.0224 | 0.8771 | 1.0000 | 1.0000 | 1.0000 | 1.0000   |
| SI        | CCDS3196  | 0.0000 | 2.0000   | 0.0000 | 23.7487   | 0.0000    | 0.0029 | 0.9035 | 1.0000 | 1.0000 | 1.0000 | 1.0000   |
| DICER1    | CCDS9931  | 0.0000 | 2.0000   | 0.0000 | 22.0816   | 0.0000    | 0.0034 | 0.9084 | 1.0000 | 1.0000 | 1.0000 | 1.0000   |
| COL1A1    | CCDS11561 | 0.0000 | 2.0000   | 0.0000 | 20.7844   | 0.0000    | 0.0039 | 0.9216 | 1.0000 | 1.0000 | 1.0000 | 1.0000   |
| ARHGAP32  | CCDS44769 | 0.0000 | 2.0000   | 0.0000 | 18.7072   | 0.0000    | 0.0049 | 0.9082 | 1.0000 | 1.0000 | 1.0000 | 1.0000   |
| FBN2      | CCDS34222 | 0.0000 | 2.0000   | 0.0000 | 12.5647   | 0.0000    | 0.0111 | 0.8859 | 1.0000 | 1.0000 | 1.0000 | 1.0000   |
| MUC4      | CCDS54700 | 0.0000 | 2.0000   | 0.0000 | 6.9626    | 0.0000    | 0.0373 | 0.8906 | 1.0000 | 1.0000 | 1.0000 | 1.0000   |
| SEC16A    | CCDS55351 | 0.0000 | 2.0000   | 0.0000 | 14.4955   | 0.0000    | 0.0083 | 0.9050 | 1.0000 | 1.0000 | 1.0000 | 1.0000   |
| ATM       | CCDS31669 | 0.0000 | 2.0000   | 0.0000 | 14.7026   | 0.0000    | 0.0080 | 0.8768 | 1.0000 | 1.0000 | 1.0000 | 1.0000   |
| GRIN2B    | CCDS8662  | 0.0000 | 2.0000   | 0.0000 | 23.7904   | 0.0000    | 0.0029 | 0.9275 | 1.0000 | 1.0000 | 1.0000 | 1.0000   |
| SACS      | CCDS9300  | 0.0000 | 2.0000   | 0.0000 | 9.7036    | 0.0000    | 0.0190 | 0.8582 | 1.0000 | 1.0000 | 1.0000 | 1.0000   |
| PLEKHG4B  | CCDS34124 | 0.0000 | 2.0000   | 0.0000 | 26.2325   | 0.0000    | 0.0024 | 0.9280 | 1.0000 | 1.0000 | 1.0000 | 1.0000   |
| CACNA2D3  | CCDS54598 | 0.0000 | 2.0000   | 0.0000 | 34.7681   | 0.0000    | 0.0013 | 0.9316 | 1.0000 | 1.0000 | 1.0000 | 1.0000   |
| SVEP1     | CCDS48004 | 0.0000 | 2.0000   | 0.0000 | 10.8832   | 0.0000    | 0.0150 | 0.8749 | 1.0000 | 1.0000 | 1.0000 | 1.0000   |
| PDZRN4    | CCDS53777 | 0.0000 | 2.0000   | 0.0000 | 32.0658   | 0.0000    | 0.0016 | 0.9276 | 1.0000 | 1.0000 | 1.0000 | 1.0000   |
| KSR2      |           | 0.0000 | 2.0000   | 0.0000 | 34.6530   | 0.0000    | 0.0013 | 0.9393 | 1.0000 | 1.0000 | 1.0000 | 1.0000   |
| SGK223    | CCDS43706 | 0.0000 | 2.0000   | 0.0000 | 22.5478   | 0.0000    | 0.0033 | 0.9311 | 1.0000 | 1.0000 | 1.0000 | 1.0000   |
| CSMD1     | CCDS55189 | 0.0000 | 2.0000   | 0.0000 | 10.4146   | 0.0000    | 0.0164 | 0.8746 | 1.0000 | 1.0000 | 1.0000 | 1.0000   |
| FAT4      | CCDS3732  | 0.0000 | 2.0000   | 0.0000 | 7.9911    | 0.0000    | 0.0282 | 0.8700 | 1.0000 | 1.0000 | 1.0000 | 1.0000   |
| TDRD15    |           | 0.0000 | 2.0000   | 0.0000 | 24.3721   | 0.0000    | 0.0028 | 0.9085 | 1.0000 | 1.0000 | 1.0000 | 1.0000   |
| USH2A     | CCDS31025 | 1.0000 | 1.0000   | 0.0000 | 3.9756    | 0.0000    | 0.2610 | 0.8492 | 1.0000 | 1.0000 | 1.0000 | 1.0000   |
| DNMT3B    | CCDS13205 | 1.0000 | 1.0000   | 0.0000 | 19.3668   | 0.0000    | 0.0447 | 0.9287 | 1.0000 | 1.0000 | 1.0000 | 1.0000   |
| CIT       | CCDS55891 | 1.0000 | 1.0000   | 0.0000 | 8.7558    | 0.0000    | 0.1091 | 0.8975 | 1.0000 | 1.0000 | 1.0000 | 1.0000   |
| ANO3      | CCDS31447 | 1.0000 | 1.0000   | 0.0000 | 21.2902   | 0.0000    | 0.0402 | 0.9271 | 1.0000 | 1.0000 | 1.0000 | 1.0000   |
| DYSF      | CCDS46328 | 1.0000 | 1.0000   | 0.0000 | 8.1101    | 0.0000    | 0.1188 | 0.9097 | 1.0000 | 1.0000 | 1.0000 | 1.0000   |
| GENPE     | CCDS34042 | 1.0000 | 1.0000   | 0.0000 | 8.9780    | 0.0000    | 0.1060 | 0.8851 | 1.0000 | 1.0000 | 1.0000 | 1.0000   |



|        |           |        |        |        |         |        |        |        |        |        |        |        |
|--------|-----------|--------|--------|--------|---------|--------|--------|--------|--------|--------|--------|--------|
| MYO10  | CCDS54834 | 1.0000 | 1.0000 | 0.0000 | 8.7128  | 0.0000 | 0.1097 | 0.8992 | 1.0000 | 1.0000 | 1.0000 | 1.0000 |
| LANCL3 | CCDS55398 | 1.0000 | 1.0000 | 0.0000 | 34.3428 | 0.0000 | 0.0235 | 0.9581 | 1.0000 | 1.0000 | 1.0000 | 1.0000 |
| TTN    | CCDS54424 | 2.0000 | 1.0000 | 0.0000 | 0.6201  | 0.0000 | 0.6037 | 0.6310 | 1.0000 | 1.0000 | 1.0000 | 1.0000 |
| SOGA2  | CCDS11841 | 1.0000 | 1.0000 | 0.0000 | 10.1826 | 0.0000 | 0.0921 | 0.9164 | 1.0000 | 1.0000 | 1.0000 | 1.0000 |
| SYNM   |           | 1.0000 | 1.0000 | 0.0000 | 9.9696  | 0.0000 | 0.0943 | 0.9169 | 1.0000 | 1.0000 | 1.0000 | 1.0000 |
| PEG3   | CCDS12948 | 1.0000 | 1.0000 | 0.0000 | 12.2464 | 0.0000 | 0.0748 | 0.9177 | 1.0000 | 1.0000 | 1.0000 | 1.0000 |
| DMD    | CCDS14233 | 2.0000 | 1.0000 | 0.0000 | 5.8133  | 0.0000 | 0.1721 | 0.8555 | 1.0000 | 1.0000 | 1.0000 | 1.0000 |
| PCDHA3 | CCDS54915 | 1.0000 | 1.0000 | 0.0000 | 16.1985 | 0.0000 | 0.0546 | 0.9422 | 1.0000 | 1.0000 | 1.0000 | 1.0000 |
| CDK11A | CCDS44042 | 2.0000 | 0.0000 | 0.0000 | 0.0000  | 0.0000 | 0.7561 | 0.9385 | 1.0000 | 1.0000 | 1.0000 | 1.0000 |
| PCM1   | CCDS47812 | 2.0000 | 0.0000 | 0.0000 | 0.0000  | 0.0000 | 0.6685 | 0.9010 | 1.0000 | 1.0000 | 1.0000 | 1.0000 |
| MYH1   | CCDS11155 | 2.0000 | 0.0000 | 0.0000 | 0.0000  | 0.0000 | 0.6606 | 0.9107 | 1.0000 | 1.0000 | 1.0000 | 1.0000 |
| PRKAG3 | CCDS2424  | 2.0000 | 0.0000 | 0.0000 | 0.0000  | 0.0000 | 0.8147 | 0.9599 | 1.0000 | 1.0000 | 1.0000 | 1.0000 |
| NPAS4  | CCDS8138  | 2.0000 | 0.0000 | 0.0000 | 0.0000  | 0.0000 | 0.7707 | 0.9462 | 1.0000 | 1.0000 | 1.0000 | 1.0000 |

| Gene  | CDSlength | Indels  | wIND      | Pval   | Qval   |
|-------|-----------|---------|-----------|--------|--------|
| TET2  | 6049      | 11.0000 | 632.3250  | 0.0000 | 0.0000 |
| ASXL1 | 4686      | 7.0000  | 519.4300  | 0.0000 | 0.0000 |
| CALR  | 1294      | 25.0000 | 6717.9537 | 0.0000 | 0.0000 |

Genes with mutations in greater than 1 MPN sample are shown. Top table shows significance of missense, nonsense and splice site mutations. Lower panel shows insertion/deletion variants. Green shading highlights significantly mutated genes. Dark green, q<0.05; Light green, q<0.20.

**Table S4. Clinical characteristics of *JAK2* and *CALR* mutated essential thrombocythemia and myelofibrosis.**

|                                          | <i>JAK2</i> mutated | <i>CALR</i> mutated | Significance     |
|------------------------------------------|---------------------|---------------------|------------------|
| <b>Essential thrombocythemia</b>         |                     |                     |                  |
| Number of patients                       | 45                  | 21                  |                  |
| Age (years, median, range)               | 60 (21-87)          | 60 (32-85)          | 0.5              |
| Female (median, %)                       | 24 (53)             | 10 (48)             | 0.8              |
| Hemoglobin (g/L, mean, SD)               | 142 (14)            | 132 (16)            | <b>0.02*</b>     |
| White-cell count ( $10^9/L$ , mean, SD)  | 10.4 (5.3)          | 8.3 (2.2)           | 0.2              |
| Platelet count ( $10^9/L$ , mean, SD)    | 833 (300)           | 1193 (504)          | <b>0.0003***</b> |
| Disease follow up (years, median, range) | 7 (1-21)            | 7 (1-21)            | 0.5              |
| Complications                            |                     |                     |                  |
| Thrombosis (%)                           | 10 (22)             | 5 (24)              | 1                |
| Transformation to myelofibrosis (%)      | 1 (2)               | 4 (19)              | <b>0.03*</b>     |
| Transformation to polycythemia vera (%)  | 7 (16)              | 0 (0)               | 0.09             |
| Death                                    | 3 (7)               | 0 (0)               | 0.5              |
| Therapy with hydroxyurea (%)             | 34 (76)             | 17 (81)             | 0.8              |
| Therapy with anagrelide (%)              | 7 (16)              | 6 (29)              | 0.3              |
| <b>Myelofibrosis</b>                     |                     |                     |                  |
| Number of patients                       | 20                  | 5                   |                  |
| Age (years, median, range)               | 63 (41-84)          | 66 (41-70)          | 0.9              |
| Female (%)                               | 8 (40)              | 0                   | 0.1              |
| Hemoglobin (g/L, mean, SD)               | 116 (23)            | 107 (15)            | 0.4              |
| White-cell count ( $10^9/L$ )            | 11.5 (9.0)          | 6.9 (4.5)           | 0.1              |
| Platelet count ( $10^9/L$ , mean, SD)    | 275 (150)           | 201 (116)           | 0.4              |
| Disease follow up (years, median, range) | 4 (1-14)            | 11 (5-16)           | <b>0.02*</b>     |
| Complications                            |                     |                     |                  |
| Thrombosis (%)                           | 4 (20)              | 2 (40)              | 0.6              |
| Transformation to acute leukemia (%)     | 1(5)                | 0                   | 1                |
| Death                                    | 3 (15)              | 1 (20)              | 1                |

Clinical characteristics of patients with essential thrombocythemia (ET), primary myelofibrosis and post-ET myelofibrosis from the exome sequencing cohort are shown. Average values for blood indices are shown from the time of diagnosis. Diagnostic blood counts and follow up information were not available in 2 and 1 patient respectively. Data refer to number of patients (%), unless otherwise stated. The large number of post ET transformations to polycythaemia vera were due to specific inclusion in the study. \*  $p < 0.05$ ; \*\*  $p < 0.01$ ; \*\*\*  $p < 0.001$

**Table S5. Cell lines screened for mutations in *CALR* exon 9**

| GDCS description                   | Number of cell lines | Name                                                                                                                                                                                                            |
|------------------------------------|----------------------|-----------------------------------------------------------------------------------------------------------------------------------------------------------------------------------------------------------------|
| acute_myeloid_leukemia             | 27                   | CESS, CMK, CTV-1, GDM-1, HEL, HL-60, KASUMI-1, KG-1, KMOE-2, KO52, ME-1, ML-2, MOLM-13, MONO-MAC-6, NB-4, NKM-1, NOMO-1, OCI-AML2, OCI-AML3, OCI-AML5, OCI-M1, P31-FUJ, PL-21, QIMR-WIL, SIG-M5, THP-1, MOLM-16 |
| adrenal_gland                      | 1                    |                                                                                                                                                                                                                 |
| anaplastic_large_cell_lymphoma     | 3                    |                                                                                                                                                                                                                 |
| B_cell_leukemia                    | 13                   |                                                                                                                                                                                                                 |
| B_cell_lymphoma                    | 35                   |                                                                                                                                                                                                                 |
| biliary_tract                      | 5                    |                                                                                                                                                                                                                 |
| Bladder                            | 20                   |                                                                                                                                                                                                                 |
| bone_other                         | 3                    |                                                                                                                                                                                                                 |
| breast                             | 52                   |                                                                                                                                                                                                                 |
| Burkitt_lymphoma                   | 13                   |                                                                                                                                                                                                                 |
| cervix                             | 15                   |                                                                                                                                                                                                                 |
| chondrosarcoma                     | 5                    |                                                                                                                                                                                                                 |
| chronic_myeloid_leukaemia          | 10                   |                                                                                                                                                                                                                 |
| digestive_system_other             | 1                    |                                                                                                                                                                                                                 |
| endometrium                        | 11                   |                                                                                                                                                                                                                 |
| ewings_sarcoma                     | 22                   |                                                                                                                                                                                                                 |
| fibrosarcoma                       | 3                    |                                                                                                                                                                                                                 |
| glioma                             | 53                   |                                                                                                                                                                                                                 |
| hematopoietic_neoplasm other       | 6                    | AMO-1, EoL-1-cell, JJN-3, KARPAS-620, MC-CAR, SKM-1                                                                                                                                                             |
| hairy_cell_leukaemia               | 4                    |                                                                                                                                                                                                                 |
| head_and_neck                      | 45                   |                                                                                                                                                                                                                 |
| Hodgkin_lymphoma                   | 9                    |                                                                                                                                                                                                                 |
| kidney                             | 34                   |                                                                                                                                                                                                                 |
| large_intestine                    | 52                   |                                                                                                                                                                                                                 |
| leukemia                           | 4                    | KY821, MV-4-11, MY-M12, RS4-11                                                                                                                                                                                  |
| liver                              | 17                   |                                                                                                                                                                                                                 |
| lung_NSCLC_adenocarcinoma          | 68                   |                                                                                                                                                                                                                 |
| lung_NSCLC_carcinoid               | 4                    |                                                                                                                                                                                                                 |
| lung_NSCLC_large cell              | 14                   |                                                                                                                                                                                                                 |
| lung_NSCLC_not specified           | 11                   |                                                                                                                                                                                                                 |
| lung_NSCLC_squamous_cell_carcinoma | 15                   |                                                                                                                                                                                                                 |
| Lung_other                         | 1                    |                                                                                                                                                                                                                 |
| lung_small_cell_carcinoma          | 66                   |                                                                                                                                                                                                                 |
| lymphoblastic_leukemia             | 12                   |                                                                                                                                                                                                                 |
| lymphoblastic_T_cell_leukaemia     | 9                    |                                                                                                                                                                                                                 |
| lymphoid_neoplasm other            | 11                   |                                                                                                                                                                                                                 |
| medulloblastoma                    | 4                    |                                                                                                                                                                                                                 |
| melanoma                           | 59                   |                                                                                                                                                                                                                 |
| mesothelioma                       | 21                   |                                                                                                                                                                                                                 |
| myeloma                            | 13                   |                                                                                                                                                                                                                 |
| nervous_system_other               | 1                    |                                                                                                                                                                                                                 |
| neuroblastoma                      | 34                   |                                                                                                                                                                                                                 |
| oesophagus                         | 35                   |                                                                                                                                                                                                                 |
| osteosarcoma                       | 10                   |                                                                                                                                                                                                                 |
| ovary                              | 43                   |                                                                                                                                                                                                                 |
| pancreas                           | 32                   |                                                                                                                                                                                                                 |
| prostate                           | 8                    |                                                                                                                                                                                                                 |
| rhabdomyosarcoma                   | 9                    |                                                                                                                                                                                                                 |
| skin_other                         | 3                    |                                                                                                                                                                                                                 |
| soft_tissue_other                  | 9                    |                                                                                                                                                                                                                 |
| stomach                            | 29                   |                                                                                                                                                                                                                 |
| T_cell_leukemia                    | 4                    |                                                                                                                                                                                                                 |
| testis                             | 3                    |                                                                                                                                                                                                                 |
| thyroid                            | 17                   |                                                                                                                                                                                                                 |
| urogenital_system_other            | 4                    |                                                                                                                                                                                                                 |
| uterus                             | 3                    |                                                                                                                                                                                                                 |
| <b>Total</b>                       | <b>1015</b>          |                                                                                                                                                                                                                 |

GDCS - Genome damage and stability centre database. Specific cell lines tested have been listed for hematopoietic groups.

Table S6. CALR mutations in exome and follow up cohorts.

| Study     | Sample         | Start(bp) | End (bp) | Length (bp) | Mutation type | DNA change      | Hematological disorder | Protein     |
|-----------|----------------|-----------|----------|-------------|---------------|-----------------|------------------------|-------------|
| Exome     | PD10056        | 13054565  | 13054616 | 52          | Deletion      | gcaga<42>aggag  | PET-MF                 | p.L367fs*46 |
| Exome     | PD4063         | 13054565  | 13054616 | 52          | Deletion      | gcaga<42>aggag  | PET-MF                 | p.L367fs*46 |
| Exome     | PD4996         | 13054565  | 13054616 | 52          | Deletion      | gcaga<42>aggag  | PET-MF                 | p.L367fs*46 |
| Exome     | PD5003         | 13054565  | 13054616 | 52          | Deletion      | gcaga<42>aggag  | ET                     | p.L367fs*46 |
| Exome     | PD5004         | 13054565  | 13054616 | 52          | Deletion      | gcaga<42>aggag  | PMF                    | p.L367fs*46 |
| Exome     | PD5005         | 13054575  | 13054608 | 34          | Deletion      | aagga<24>agagg  | PMF                    | p.K368fs*51 |
| Exome     | PD5014         | 13054565  | 13054616 | 52          | Deletion      | gcaga<42>aggag  | PMF                    | p.L367fs*46 |
| Exome     | PD6549         | 13054627  | 13054628 | 5           | Insertion     | TTGTC           | ET                     | p.K385fs*47 |
| Exome     | PD6561         | 13054627  | 13054628 | 5           | Insertion     | TTGTC           | ET                     | p.K385fs*47 |
| Exome     | PD6563         | 13054565  | 13054616 | 52          | Deletion      | gcaga<42>aggag  | ET                     | p.L367fs*46 |
| Exome     | PD6566         | 13054627  | 13054628 | 5           | Insertion     | TTGTC           | ET                     | p.K385fs*47 |
| Exome     | PD6573         | 13054627  | 13054628 | 5           | Insertion     | TTGTC           | ET                     | p.K385fs*47 |
| Exome     | PD6597         | 13054627  | 13054628 | 5           | Insertion     | TTGTC           | ET                     | p.K385fs*47 |
| Exome     | PD6602         | 13054627  | 13054628 | 5           | Insertion     | TTGTC           | ET                     | p.K385fs*47 |
| Exome     | PD6628         | 13054627  | 13054628 | 5           | Insertion     | TTGTC           | ET                     | p.K385fs*47 |
| Exome     | PD7438         | 13054569  | 13054602 | 34          | Deletion      | aggct<24>acgca  | ET                     | p.R366fs*53 |
| Exome     | PD7440         | 13054627  | 13054628 | 5           | Insertion     | TTGTC           | ET                     | p.K385fs*47 |
| Exome     | PD7442         | 13054627  | 13054628 | 5           | Insertion     | TTGTC           | ET                     | p.K385fs*47 |
| Exome     | PD7443         | 13054565  | 13054616 | 52          | Deletion      | gcaga<42>aggag  | ET                     | p.L367fs*46 |
| Exome     | PD8632         | 13054627  | 13054628 | 5           | Insertion     | TTGTC           | ET                     | p.K385fs*47 |
| Exome     | PD8637         | 13054565  | 13054616 | 52          | Deletion      | gcaga<42>aggag  | ET                     | p.L367fs*46 |
| Exome     | PD8642         | 13054565  | 13054616 | 52          | Deletion      | gcaga<42>aggag  | ET                     | p.L367fs*46 |
| Exome     | PD8942         | 13054627  | 13054628 | 5           | Insertion     | TTGTC           | ET                     | p.K385fs*47 |
| Exome     | PD8943         | 13054627  | 13054628 | 5           | Insertion     | TTGTC           | PET-MF                 | p.K385fs*47 |
| Exome     | PD9419         | 13054565  | 13054616 | 52          | Deletion      | gcaga<42>aggag  | PMF                    | p.L367fs*46 |
| Exome     | PD9423         | 13054565  | 13054616 | 52          | Deletion      | gcaga<42>aggag  | ET                     | p.L367fs*46 |
| Follow_up | CU2258         | 13054627  | 13054628 | 5           | Insertion     | TTGTC           | ET                     | p.K385fs*47 |
| Follow_up | E2737          | 13054565  | 13054616 | 52          | Deletion      | gcaga<42>aggag  | aCML                   | p.L367fs*46 |
| Follow_up | FD86           | 13054565  | 13054616 | 52          | Deletion      | gcaga<42>aggag  | ET                     | p.L367fs*46 |
| Follow_up | IF0903         | 13054627  | 13054628 | 5           | Insertion     | TTGTC           | ET                     | p.K385fs*47 |
| Follow_up | JC1148         | 13054627  | 13054628 | 5           | Insertion     | TTGTC           | ET                     | p.K385fs*47 |
| Follow_up | JM83           | 13054627  | 13054628 | 5           | Insertion     | TTGTC           | ET                     | p.K385fs*47 |
| Follow_up | JY91           | 13054627  | 13054628 | 5           | Insertion     | TTGTC           | ET                     | p.K385fs*47 |
| Follow_up | KT03_AML_phase | 13054627  | 13054628 | 5           | Insertion     | TTGTC           | AML                    | p.K385fs*47 |
| Follow_up | KT03_PMF_phase | 13054627  | 13054628 | 5           | Insertion     | TTGTC           | PMF                    | p.K385fs*47 |
| Follow_up | LT99           | 13054565  | 13054616 | 52          | Deletion      | gcaga<42>aggag  | ET                     | p.L367fs*46 |
| Follow_up | MD08           | 13054575  | 13054608 | 34          | Deletion      | aagga<24>agagg  | ET                     | p.K368fs*51 |
| Follow_up | MP69_AML_phase | 13054627  | 13054628 | 5           | Insertion     | TTGTC           | AML                    | p.K385fs*47 |
| Follow_up | MP69_ET_phase  | 13054627  | 13054628 | 5           | Insertion     | TTGTC           | ET                     | p.K385fs*47 |
| Follow_up | SD38           | 13054627  | 13054628 | 5           | Insertion     | TTGTC           | ET                     | p.K385fs*47 |
| Follow_up | WGA-PD10095c   | 13054565  | 13054616 | 52          | Deletion      | gcaga<42>aggag  | ET                     | p.L367fs*46 |
| Follow_up | WGA-PD10105c   | 13054627  | 13054628 | 5           | Insertion     | TTGTC           | ET                     | p.K385fs*47 |
| Follow_up | WGA-PD10155c   | 13054565  | 13054616 | 52          | Deletion      | gcaga<42>aggag  | ET                     | p.L367fs*46 |
| Follow_up | WGA-PD10156c   | 13054565  | 13054616 | 52          | Deletion      | gcaga<42>aggag  | ET                     | p.L367fs*46 |
| Follow_up | WGA-PD10160c   | 13054627  | 13054628 | 5           | Insertion     | TTGTC           | ET                     | p.K385fs*47 |
| Follow_up | WGA-PD10225c   | 13054627  | 13054628 | 5           | Insertion     | TTGTC           | ET                     | p.K385fs*47 |
| Follow_up | WGA-PD10250c   | 13054627  | 13054628 | 5           | Insertion     | TTGTC           | ET                     | p.K385fs*47 |
| Follow_up | WGA-PD10313c   | 13054627  | 13054628 | 5           | Insertion     | TTGTC           | ET                     | p.K385fs*47 |
| Follow_up | WGA-PD10328c   | 13054627  | 13054628 | 5           | Insertion     | TTGTC           | ET                     | p.K385fs*47 |
| Follow_up | WGA-PD10368c   | 13054584  | 13054614 | 31          | Deletion      | gaaga<21>ggagg  | ET                     | p.E371fs*49 |
| Follow_up | WGA-PD10369c   | 13054627  | 13054628 | 5           | Insertion     | TTGTC           | ET                     | p.K385fs*47 |
| Follow_up | WGA-PD10390c   | 13054565  | 13054616 | 52          | Deletion      | gcaga<42>aggag  | ET                     | p.L367fs*46 |
| Follow_up | WGA-PD10397d   | 13054573  | 13054633 | 61          | Deletion      | ttaag<51>gaggga | ET                     | p.K368fs*43 |
| Follow_up | WGA-PD10433c   | 13054627  | 13054628 | 5           | Insertion     | TTGTC           | ET                     | p.K385fs*47 |
| Follow_up | WGA-PD10445c   | 13054568  | 13054613 | 46          | Deletion      | gaggc<36>aggag  | ET                     | p.L367fs*48 |
| Follow_up | WGA-PD10505c   | 13054627  | 13054628 | 5           | Insertion     | TTGTC           | ET                     | p.K385fs*47 |
| Follow_up | WGA-PD10506c   | 13054565  | 13054616 | 52          | Deletion      | gcaga<42>aggag  | ET                     | p.L367fs*46 |
| Follow_up | WGA-PD10514c   | 13054565  | 13054616 | 52          | Deletion      | gcaga<42>aggag  | ET                     | p.L367fs*46 |
| Follow_up | WGA-PD10517c   | 13054627  | 13054628 | 5           | Insertion     | TTGTC           | ET                     | p.K385fs*47 |
| Follow_up | WGA-PD10522c   | 13054582  | 13054618 | 37          | Deletion      | aggaa<27>gaggc  | ET                     | p.E371fs*47 |
| Follow_up | WGA-PD10538c   | 13054627  | 13054628 | 5           | Insertion     | TTGTC           | ET                     | p.K385fs*47 |
| Follow_up | WGA-PD10574c   | 13054565  | 13054616 | 52          | Deletion      | gcaga<42>aggag  | ET                     | p.L367fs*46 |
| Follow_up | WGA-PD10595c   | 13054565  | 13054616 | 52          | Deletion      | gcaga<42>aggag  | ET                     | p.L367fs*46 |
| Follow_up | WGA-PD10611c   | 13054565  | 13054616 | 52          | Deletion      | gcaga<42>aggag  | ET                     | p.L367fs*46 |
| Follow_up | WGA-PD10626c   | 13054565  | 13054616 | 52          | Deletion      | gcaga<42>aggag  | ET                     | p.L367fs*46 |
| Follow_up | WGA-PD10671c   | 13054627  | 13054628 | 5           | Insertion     | TTGTC           | ET                     | p.K385fs*47 |
| Follow_up | WGA-PD10676c   | 13054565  | 13054616 | 52          | Deletion      | gcaga<42>aggag  | ET                     | p.L367fs*46 |
| Follow_up | WGA-PD11836a   | 13054565  | 13054616 | 52          | Deletion      | gcaga<42>aggag  | PMF                    | p.L367fs*46 |
| Follow_up | WGA-PD11838a   | 13054565  | 13054616 | 52          | Deletion      | gcaga<42>aggag  | PMF                    | p.L367fs*46 |
| Follow_up | WGA-PD11852a   | 13054627  | 13054628 | 5           | Insertion     | GTGTC           | PMF                    | p.K385fs*47 |
| Follow_up | WGA-PD11879a   | 13054565  | 13054616 | 52          | Deletion      | gcaga<42>aggag  | PMF                    | p.L367fs*46 |
| Follow_up | WGA-PD11882a   | 13054565  | 13054616 | 52          | Deletion      | gcaga<42>aggag  | PET-MF                 | p.L367fs*46 |
| Follow_up | WGA-PD11889a   | 13054627  | 13054628 | 5           | Insertion     | TTGTC           | PET-MF                 | p.K385fs*47 |
| Follow_up | WGA-PD11898a   | 13054565  | 13054616 | 52          | Deletion      | gcaga<42>aggag  | PET-MF                 | p.L367fs*46 |
| Follow_up | WGA-PD11901a   | 13054582  | 13054633 | 52          | Deletion      | aggaa<42>gaggga | PMF                    | p.E370fs*42 |
| Follow_up | WGA-PD11902a   | 13054627  | 13054628 | 5           | Insertion     | TTGTC           | PMF                    | p.K385fs*47 |
| Follow_up | WGA-PD11920a   | 13054571  | 13054604 | 34          | Deletion      | gctta<24>gcaaa  | PMF                    | p.L367fs*52 |
| Follow_up | WGA-PD11927a   | 13054565  | 13054616 | 52          | Deletion      | gcaga<42>aggag  | PMF                    | p.L367fs*46 |
| Follow_up | WGA-PD11935a   | 13054565  | 13054616 | 52          | Deletion      | gcaga<42>aggag  | PET-MF                 | p.L367fs*46 |
| Follow_up | WGA-PD11939a   | 13054565  | 13054616 | 52          | Deletion      | gcaga<42>aggag  | PET-MF                 | p.L367fs*46 |

| Study     | Sample       | Start(bp) | End (bp) | Length (bp) | Mutation type | DNA change            | Hematological disorder | Protein     |
|-----------|--------------|-----------|----------|-------------|---------------|-----------------------|------------------------|-------------|
| Follow_up | WGA-PD11950a | 13054565  | 13054616 | 52          | Deletion      | gcaga<42>aggag        | PET-MF                 | p.L367fs*46 |
| Follow_up | WGA-PD11951a | 13054627  | 13054628 | 5           | Insertion     | TTGTC                 | PET-MF                 | p.K385fs*47 |
| Follow_up | WGA-PD11971a | 13054565  | 13054616 | 52          | Deletion      | gcaga<42>aggag        | PET-MF                 | p.L367fs*46 |
| Follow_up | WGA-PD11988a | 13054565  | 13054616 | 52          | Deletion      | gcaga<42>aggag        | PET-MF                 | p.L367fs*46 |
| Follow_up | WGA-PD11994a | 13054627  | 13054628 | 5           | Insertion     | TTGTC                 | PMF                    | p.K385fs*47 |
| Follow_up | WGA-PD12001a | 13054565  | 13054616 | 52          | Deletion      | gcaga<42>aggag        | PMF                    | p.L367fs*46 |
| Follow_up | WGA-PD12005a | 13054627  | 13054628 | 5           | Insertion     | TTGTC                 | PET-MF                 | p.K385fs*47 |
| Follow_up | WGA-PD12006a | 13054565  | 13054616 | 52          | Deletion      | gcaga<42>aggag        | PET-MF                 | p.L367fs*46 |
| Follow_up | WGA-PD12012a | 13054581  | 13054617 | 37          | Deletion      | gagga<27>ggagg        | PET-MF                 | p.E370fs*48 |
| Follow_up | WGA-PD12281a | 13054565  | 13054616 | 52          | Deletion      | gcaga<42>aggag        | ET                     | p.L367fs*46 |
| Follow_up | WGA-PD12285a | 13054627  | 13054628 | 5           | Insertion     | TTGTC                 | ET                     | p.K385fs*47 |
| Follow_up | WGA-PD12786a | 13054627  | 13054628 | 5           | Insertion     | TTGTC                 | ET                     | p.K385fs*47 |
| Follow_up | WGA-PD12789a | 13054616  | 13054628 | 4           | Complex       | ggcagaggacaa_TCCTTGTC | ET                     | p.E381fs*48 |
| Follow_up | WGA-PD12904a | 13054565  | 13054616 | 52          | Deletion      | gcaga<42>aggag        | PMF                    | p.L367fs*46 |
| Follow_up | WGA-PD12914a | 13054565  | 13054616 | 52          | Deletion      | gcaga<42>aggag        | ET                     | p.L367fs*46 |
| Follow_up | WGA-PD12919a | 13054565  | 13054616 | 52          | Deletion      | gcaga<42>aggag        | PMF                    | p.L367fs*46 |
| Follow_up | WGA-PD12934a | 13054565  | 13054616 | 52          | Deletion      | gcaga<42>aggag        | ET                     | p.L367fs*46 |
| Follow_up | WGA-PD12940a | 13054565  | 13054616 | 52          | Deletion      | gcaga<42>aggag        | ET                     | p.L367fs*46 |
| Follow_up | WGA-PD12941a | 13054627  | 13054628 | 5           | Insertion     | TTGTC                 | PMF                    | p.K385fs*47 |
| Follow_up | WGA-PD12943a | 13054565  | 13054616 | 52          | Deletion      | gcaga<42>aggag        | PMF                    | p.L367fs*46 |
| Follow_up | WGA-PD12956a | 13054565  | 13054616 | 52          | Deletion      | gcaga<42>aggag        | ET                     | p.L367fs*46 |
| Follow_up | WGA-PD12980a | 13054565  | 13054616 | 52          | Deletion      | gcaga<42>aggag        | ET                     | p.L367fs*46 |
| Follow_up | WGA-PD12982a | 13054565  | 13054616 | 52          | Deletion      | gcaga<42>aggag        | ET                     | p.L367fs*46 |
| Follow_up | WGA-PD12985a | 13054565  | 13054616 | 52          | Deletion      | gcaga<42>aggag        | PMF                    | p.L367fs*46 |
| Follow_up | WGA-PD12986a | 13054568  | 13054613 | 46          | Deletion      | gaggg<36>aggag        | ET                     | p.L367fs*48 |
| Follow_up | WGA-PD13007a | 13054565  | 13054616 | 52          | Deletion      | gcaga<42>aggag        | ET                     | p.L367fs*46 |
| Follow_up | WGA-PD13019a | 13054627  | 13054628 | 5           | Insertion     | TTGTC                 | ET                     | p.K385fs*47 |
| Follow_up | WGA-PD13028a | 13054627  | 13054628 | 5           | Insertion     | TTGTC                 | ET                     | p.K385fs*47 |
| Follow_up | WGA-PD13039a | 13054599  | 13054602 | 2           | Complex       | TTTGC_gca             | PMF                    | p.R376fs*55 |
| Follow_up | WGA-PD13040a | 13054627  | 13054628 | 5           | Insertion     | TTGTC                 | PMF                    | p.K385fs*47 |
| Follow_up | WGA-PD13042a | 13054565  | 13054616 | 52          | Deletion      | gcaga<42>aggag        | ET                     | p.L367fs*46 |
| Follow_up | WGA-PD5292h  | 13054627  | 13054628 | 5           | Insertion     | TTGTC                 | ET                     | p.K385fs*47 |
| Follow_up | WGA-PD5323c  | 13054627  | 13054628 | 5           | Insertion     | TTGTC                 | ET                     | p.K385fs*47 |
| Follow_up | WGA-PD5324c  | 13054565  | 13054616 | 52          | Deletion      | gcaga<42>aggag        | ET                     | p.L367fs*46 |
| Follow_up | WGA-PD5331c  | 13054627  | 13054628 | 5           | Insertion     | TTGTC                 | ET                     | p.K385fs*47 |
| Follow_up | WGA-PD5349c  | 13054627  | 13054628 | 5           | Insertion     | TTGTC                 | ET                     | p.K385fs*47 |
| Follow_up | WGA-PD5361c  | 13054627  | 13054628 | 5           | Insertion     | TTGTC                 | ET                     | p.K385fs*47 |
| Follow_up | WGA-PD5363c  | 13054580  | 13054649 | 70          | Deletion      | ggagg<60>aagat        | ET                     | p.E370fs*37 |
| Follow_up | WGA-PD5364c  | 13054565  | 13054616 | 52          | Deletion      | gcaga<42>aggag        | ET                     | p.L367fs*46 |
| Follow_up | WGA-PD5373c  | 13054565  | 13054616 | 52          | Deletion      | gcaga<42>aggag        | ET                     | p.L367fs*46 |
| Follow_up | WGA-PD5377c  | 13054575  | 13054608 | 34          | Deletion      | aagga<24>agagg        | ET                     | p.K368fs*51 |
| Follow_up | WGA-PD5388d  | 13054627  | 13054628 | 5           | Insertion     | TTGTC                 | ET                     | p.K385fs*47 |
| Follow_up | WGA-PD5395c  | 13054625  | 13054628 | 5           | Complex       | TCCTTGTC_aa           | ET                     | p.K385fs*47 |
| Follow_up | WGA-PD5397c  | 13054565  | 13054616 | 52          | Deletion      | gcaga<42>aggag        | ET                     | p.L367fs*46 |
| Follow_up | WGA-PD5402c  | 13054627  | 13054628 | 5           | Insertion     | TTGTC                 | ET                     | p.K385fs*47 |
| Follow_up | WGA-PD5407c  | 13054565  | 13054616 | 52          | Deletion      | gcaga<42>aggag        | ET                     | p.L367fs*46 |
| Follow_up | WGA-PD5412c  | 13054565  | 13054616 | 52          | Deletion      | gcaga<42>aggag        | ET                     | p.L367fs*46 |
| Follow_up | WGA-PD5415c  | 13054565  | 13054616 | 52          | Deletion      | gcaga<42>aggag        | ET                     | p.L367fs*46 |
| Follow_up | WGA-PD5430c  | 13054588  | 13054618 | 31          | Deletion      | aagac<21>gaggg        | ET                     | p.D373fs*48 |
| Follow_up | WGA-PD5435c  | 13054627  | 13054628 | 5           | Insertion     | TTGTC                 | ET                     | p.K385fs*47 |
| Follow_up | WGA-PD5437c  | 13054627  | 13054628 | 5           | Insertion     | TTGTC                 | ET                     | p.K385fs*47 |
| Follow_up | WGA-PD5446c  | 13054593  | 13054602 | 10          | Deletion      | aagaa<0>acgca         | ET                     | p.K374fs*53 |
| Follow_up | WGA-PD5448c  | 13054565  | 13054616 | 52          | Deletion      | gcaga<42>aggag        | ET                     | p.L367fs*46 |
| Follow_up | WGA-PD5451c  | 13054627  | 13054628 | 5           | Insertion     | TTGTC                 | ET                     | p.K385fs*47 |
| Follow_up | WGA-PD5455c  | 13054565  | 13054616 | 52          | Deletion      | gcaga<42>aggag        | ET                     | p.L367fs*46 |
| Follow_up | WGA-PD5457c  | 13054627  | 13054628 | 5           | Insertion     | TTGTC                 | ET                     | p.K385fs*47 |
| Follow_up | WGA-PD5458c  | 13054627  | 13054628 | 5           | Insertion     | TTGTC                 | ET                     | p.K385fs*47 |
| Follow_up | WGA-PD5477c  | 13054565  | 13054616 | 52          | Deletion      | gcaga<42>aggag        | ET                     | p.L367fs*46 |
| Follow_up | WGA-PD6260a  | 13054565  | 13054616 | 52          | Deletion      | gcaga<42>aggag        | RA                     | p.L367fs*46 |
| Follow_up | WGA-PD6265a  | 13054565  | 13054616 | 52          | Deletion      | gcaga<42>aggag        | RAEB                   | p.L367fs*46 |
| Follow_up | WGA-PD6295a  | 13054627  | 13054628 | 5           | Insertion     | TTGTC                 | RARS                   | p.K385fs*47 |
| Follow_up | WGA-PD6296a  | 13054565  | 13054616 | 52          | Deletion      | gcaga<42>aggag        | RARS                   | p.L367fs*46 |
| Follow_up | WGA-PD6308a  | 13054627  | 13054628 | 5           | Insertion     | TTGTC                 | RAEB                   | p.K385fs*47 |
| Follow_up | WGA-PD6313a  | 13054627  | 13054628 | 5           | Insertion     | TTGTC                 | RARS                   | p.K385fs*47 |
| Follow_up | WGA-PD6476a  | 13054568  | 13054628 | 61          | Deletion      | gaggg<51>acaag        | RA                     | p.L367fs*44 |
| Follow_up | WGA-PD6484a  | 13054627  | 13054628 | 5           | Insertion     | TTGTC                 | CMMML                  | p.K385fs*47 |
| Follow_up | WGA-PD6503a  | 13054565  | 13054616 | 52          | Deletion      | gcaga<42>aggag        | RA                     | p.L367fs*46 |
| Follow_up | WGA-PD6506a  | 13054627  | 13054628 | 5           | Insertion     | TTGTC                 | RA                     | p.K385fs*47 |
| Follow_up | WGA-PD6515a  | 13054565  | 13054616 | 52          | Deletion      | gcaga<42>aggag        | RA                     | p.L367fs*46 |
| Follow_up | WGA-PD6575e  | 13054627  | 13054628 | 5           | Insertion     | TTGTC                 | ET                     | p.K385fs*47 |

All CALR mutations identified in the exome sequencing cohort and follow up study are listed. For deletions, base pair positions are of the first and last nucleotide of the deleted sequence; for insertions the base pair positions are of nucleotides between which the insertion occurs. 'DNA change' shows the exact nucleotide change that occurs with deleted nucleotides in lower case and inserted nucleotides in upper case. ET, essential thrombocythemia; PET-MF, post-ET myelofibrosis; PMF, primary myelofibrosis; RA, refractory anemia; RARS, refractory anemia with ringed sideroblasts; RAEB, refractory anemia with excess blasts; CMMML, chronic myelomonocytic leukemia; aCML, atypical chronic myeloid leukemia.
